# Supplementary material
Source: publisher site journal article supplement (https://www.spandidos-publications.com/6090/downloadSupplementary)
Supplement: Supplementary file 1 [file downloadSupplementary]

## Sheet: diffExplog2 S1
Table SI. Differential expression analysis and the mRNA expression profile of the differentially expressed genes from the GSE46408 dataset.
Gene	GSM1129835	GSM1129837	GSM1129839	GSM1129841	GSM1129843	GSM1129845	GSM1129834	GSM1129836	GSM1129838	GSM1129840	GSM1129842	GSM1129844	Log fold change	Average expression	t-value	P-value	Adjusted P-value	B
ITLN1	10.085837670	10.498475830	11.385790050	10.025162250	10.450122250	9.840536563	5.757077500	6.434618699	5.426012207	6.094082976	5.705207917	5.172467572	-4.616076291	8.072949290	-15.351244270	1.64x10^-9	3.24x10^-5	11.603721060
CNTN3	7.450184917	6.939896667	7.538302789	7.068889667	7.265032917	7.143551541	4.407170583	2.725596000	2.789340583	3.875010250	3.262787250	3.632750558	-3.785533879	5.341542810	-12.918808330	1.27x10^-8	1.26x10^-4	9.939577825
LCAT	10.131485580	10.739513330	11.129432300	10.587969230	11.282491670	9.308220417	5.381100529	6.236674560	6.479452583	6.529045250	6.022232745	4.892636500	-4.606328394	8.226687892	-11.936340830	3.20x10^-8	1.47x10^-4	9.148584453
MT1F	13.671167500	14.594578780	14.963324170	14.420754170	14.197629170	14.311375090	9.332357227	11.338928330	9.500052750	10.013539080	8.748815667	9.259350417	-4.660964232	12.029322700	-11.848370910	3.49x10^-8	1.47x10^-4	9.073937030
CDKN3	6.272005608	7.201300489	5.601913546	5.133058917	6.253009664	7.321286500	11.052577600	11.928499270	11.271560530	11.609462500	10.185517190	10.870744170	4.855964422	8.725077998	11.779262290	3.73x10^-8	1.47x10^-4	9.014833303
PEG10	5.392802083	5.045365250	5.307332250	2.837860936	4.095691000	4.943200333	10.180806780	11.841535940	10.080154500	10.840144170	10.661845420	9.130214462	5.852074902	7.529746093	11.513006840	4.86x10^-8	1.60x10^-4	8.783264414
ADAMTS13	10.662735430	10.137499740	9.582986944	10.617298900	9.911421050	10.447017840	6.963403982	7.405087913	7.395237412	7.533785223	7.060217324	6.162591742	-3.139772719	8.656606959	-11.079633570	7.56x10^-8	2.13x10^-4	8.392825853
CCNB1	7.113983333	7.511101167	7.313574567	6.853643898	6.705677167	7.276179669	11.308605830	11.745247670	10.455723370	11.874950580	9.793945500	10.501361000	3.817612360	9.037832813	10.806852030	1.01x10^-7	2.41x10^-4	8.138129755
TMEM27	11.413621550	10.749470000	12.412231670	11.642856670	11.821330830	11.258952500	7.552449229	5.926776891	8.204753000	7.449307593	7.948716500	6.741615792	-4.245807369	9.426840185	-10.694139770	1.13x10^-7	2.41x10^-4	8.030805514
CENPA	2.063117008	3.025114500	1.027909096	0.147304583	0.619490617	3.168679167	9.219001167	9.967309883	7.743416083	8.677769083	7.006047333	7.681060833	6.707164902	5.028851613	10.626304070	1.22x10^-7	2.41x10^-4	7.965613950
CLEC4M	10.798002500	10.158346330	10.935484170	9.225514907	10.533832420	10.654212060	6.065172583	6.393005667	6.580098001	6.994270917	7.622278917	7.124356833	-3.587701577	8.590381275	-10.518525260	1.37x10^-7	2.46x10^-4	7.861100083
C6orf173	8.007241967	8.008832250	7.955538750	7.993862417	7.789298667	8.465097167	10.522868270	11.488305890	9.929321583	11.018967400	11.471935950	10.780025000	2.831925480	9.452607943	10.240301440	1.86x10^-7	2.73x10^-4	7.585893341
CDC2	6.366103667	6.532686742	6.379317167	5.123322833	6.575932975	7.694423581	11.296058330	11.309782500	10.178325080	11.692567340	9.698281449	10.871646990	4.395812455	8.643204055	10.135355510	2.08x10^-7	2.73x10^-4	7.480018334
PTTG1	10.153562950	10.134852540	9.062663235	9.009639465	9.867391417	9.822442750	13.467075000	14.215357500	12.779301420	13.350195010	12.404712500	12.584517500	3.458434429	11.404309270	10.063468190	2.26x10^-7	2.73x10^-4	7.406828929
TPPP2	10.501024000	9.314048417	10.941460340	10.514118580	11.273451670	9.856872167	5.931994296	6.435802863	6.998017500	5.714358417	6.987888667	7.322339479	-3.835095659	8.482614700	-10.055339570	2.28x10^-7	2.73x10^-4	7.398518759
CLEC4G	12.963115000	12.361061670	13.223817610	11.284337500	12.106387010	12.842843330	6.898714315	5.918331948	6.029003417	9.132548000	7.377044167	5.623680969	-5.633706550	9.646740411	-10.033087630	2.34x10^-7	2.73x10^-4	7.375734009
DSCC1	5.220718750	4.911169417	5.373230917	5.506971156	4.458642500	5.406662167	8.510435155	8.957552167	7.646794167	8.505871400	7.329206287	8.153537083	3.037666892	6.665065930	10.026656970	2.35x10^-7	2.73x10^-4	7.369139587
FAM13A1	10.956654140	10.802043330	11.471935950	11.105361810	11.860533330	11.074269170	8.029594120	9.012995417	8.207779833	6.897880583	7.743984067	7.219542151	-3.359836927	9.531881159	-9.802707079	3.03x10^-7	3.22x10^-4	7.136720752
KCNK17	6.811299367	6.380783935	6.628535050	7.395608667	5.833111667	6.931805833	4.152017020	3.557850000	4.049461333	4.096587083	4.463789417	3.688901583	-2.662089680	5.332479246	-9.784165245	3.10x10^-7	3.22x10^-4	7.117234259
GCGR	8.784806073	9.290857995	9.251073279	9.237565334	9.756514750	9.088689781	5.562358526	5.653090718	5.836307029	6.335871963	6.151091260	7.448398426	-3.070398215	7.699718761	-9.725155323	3.32x10^-7	3.27x10^-4	7.054967084
MOGAT2	9.580156917	8.993342703	10.193485310	9.441971982	9.307337250	8.679845249	5.146493894	3.149498083	4.583196299	5.453011833	5.596990083	6.149756417	-4.352865468	7.189590502	-9.630213881	3.70x10^-7	3.48x10^-4	6.953978242
CCNB2	6.046059847	6.708348572	5.519997344	5.127357750	5.667032946	6.127306760	10.148451790	10.700735830	8.835762202	10.551475330	8.822873094	8.987011277	3.808367718	7.770201062	9.306308388	5.41x10^-7	4.78x10^-4	6.601807330
FLJ22763	8.770877250	9.744155833	10.132663320	9.941146083	10.351032420	8.766380750	4.589119083	2.709240500	5.767314949	4.395036583	4.902485167	6.102832583	-4.873371132	7.181023710	-9.268666951	5.66x10^-7	4.78x10^-4	6.560101270
ZGPAT	14.328504290	13.614515830	14.888944170	14.648635800	15.037449170	13.329760000	11.763877500	11.455544170	11.388542690	11.650844680	11.597200830	11.356552710	-2.772541112	12.921697650	-9.230072830	5.93x10^-7	4.78x10^-4	6.517168355
MELK	5.049898603	5.707487820	5.586768667	4.803801091	4.359748833	5.491773887	9.740486583	9.685212572	8.270788583	8.470836268	7.572387901	9.186280333	3.654418890	6.993789262	9.213501975	6.05x10^-7	4.78x10^-4	6.498681169
CYP4A11	10.755268330	11.136272690	11.608365830	11.025337500	11.099344170	10.043254400	6.384009529	6.899575626	8.262585583	8.403101928	7.558448330	7.698269250	-3.410308779	9.239486097	-9.143751541	6.58x10^-7	5.00x10^-4	6.420510904
SGOL2	5.656975250	5.820443583	5.493017915	4.617936083	4.799480750	5.326536297	9.003496250	9.103160583	7.879517915	8.137399250	7.384275324	8.448701250	3.040360116	6.805911704	9.109637113	6.85x10^-7	5.01x10^-4	6.382069339
CDCA5	6.325020696	6.735150333	5.369939417	5.333945004	6.751423167	7.373254495	10.666360000	11.185662390	9.542409991	9.904122667	9.585496463	9.628443087	3.770626914	8.200102309	9.061919633	7.26x10^-7	5.12x10^-4	6.328067519
UBE2C	6.903539000	8.160888000	6.421134500	6.905637833	8.031431055	8.058441040	12.129515000	12.311901220	10.947059170	12.256294170	10.644572500	10.324062420	4.022055507	9.424539659	8.880775546	9.06x10^-7	6.00x10^-4	6.120580921
PROZ	11.446359280	10.549629680	11.230231670	11.106462300	9.654147161	10.149863080	5.719167333	6.476737250	8.116108471	6.582336968	6.391753000	7.640582667	-3.868334579	8.755281571	-8.854770165	9.36x10^-7	6.00x10^-4	6.090467508
AURKA	6.419604167	7.137673500	6.955177333	6.535051205	6.965490137	6.817991917	10.053513600	10.372797330	9.636359000	10.611776620	8.373603417	10.403763860	3.103470928	8.356900174	8.849972448	9.42x10^-7	6.00x10^-4	6.084902880
CNIH4	12.510857840	12.421211670	12.871495000	12.688900000	12.600463330	12.611085000	14.479461670	14.424812600	13.982751670	15.006209280	14.292014630	14.249427500	1.788444083	13.511557510	8.820434746	9.77x10^-7	6.03x10^-4	6.050581524
GBP7	11.872874170	12.429159170	12.446377500	12.383273930	12.432635000	12.355680920	8.243380917	7.312649891	9.289469507	9.293326838	7.861111083	10.062941580	-3.642853477	10.498573370	-8.782058953	1.02x10^-6	6.13x10^-4	6.005830791
BIRC5	7.152616934	8.589777416	6.601301583	6.670284495	8.249768023	9.299375274	12.141837350	13.171570950	11.954314200	12.585670830	11.408808150	11.457083330	4.359360182	9.940200712	8.756190498	1.06x10^-6	6.14x10^-4	5.975562738
CENPF	6.505422333	6.946612764	5.032598417	5.173893083	5.877632000	6.677780750	12.258238330	11.919061670	9.781900083	11.053106670	9.266055679	10.332309060	4.732788691	8.402050903	8.708777351	1.12x10^-6	6.18x10^-4	5.919870840
SPINK1	9.226674583	9.745013193	8.029594120	9.455856417	8.722038018	6.157525545	17.237363330	15.849693330	15.425322230	16.094965830	17.497568390	12.452744170	7.203492568	12.157863260	8.680309240	1.16x10^-6	6.18x10^-4	5.886297808
TOP2A	5.780594173	5.686888667	4.149125582	3.266245917	5.372534665	5.879994917	10.963163590	11.359450710	9.646623500	10.071613420	8.211291471	10.041423290	5.026363677	7.535745825	8.671306947	1.18x10^-6	6.18x10^-4	5.875660204
MARCO	12.665957500	12.604917510	13.370608330	11.563091670	13.190042500	12.284891670	8.296364485	9.113727167	7.585150985	10.147454000	8.097264739	7.115437833	-4.220684995	10.502909030	-8.662317533	1.19x10^-6	6.18x10^-4	5.865027725
KIF20A	4.737637833	5.568925836	5.347369174	6.131439864	5.740817167	5.570529250	8.784241798	9.134070917	8.230341818	9.118014784	7.214581417	8.403770465	2.964717013	6.998478360	8.566687454	1.34x10^-6	6.43x10^-4	5.751291558
C6	13.558063630	13.426957320	13.561224170	13.453300830	13.601696670	12.245158380	8.004282750	9.696336417	10.763074170	10.227805300	9.139219095	10.016551330	-3.666521990	11.474472500	-8.566514439	1.34x10^-6	6.43x10^-4	5.751084742
HMMR	6.772626528	7.407703667	7.773867167	7.303811989	8.119714491	8.387532073	11.194187500	11.700496250	10.546534670	11.317779170	9.547563633	11.469117500	3.335070467	9.295077886	8.553680520	1.36x10^-6	6.43x10^-4	5.735733008
CDCA8	7.687176396	7.926593750	7.437353667	7.408509917	8.323632333	8.494888167	11.086870160	11.283453330	10.111912920	10.934075830	9.706676912	10.388082310	2.705486206	9.232435475	8.547878998	1.37x10^-6	6.43x10^-4	5.728786482
CDC25C	2.487578750	4.207696833	4.138466750	3.159297991	4.042141833	4.431220000	7.421163833	8.719845097	7.259367500	8.897260417	6.321392912	7.949627000	4.017042433	5.752921576	8.515731713	1.43x10^-6	6.43x10^-4	5.690217250
GOT2	12.943619530	12.876845830	12.523552950	12.389267030	12.405837700	12.204327280	10.146367680	10.834052960	10.833333330	10.191710470	10.582500500	11.066908330	-1.948096175	11.583193630	-8.510387128	1.44x10^-6	6.43x10^-4	5.683792284
LRAT	7.859908459	7.614522917	7.879777667	8.680543583	8.116746417	8.633611671	4.464811334	4.419668583	5.236896750	5.534267667	5.773558767	6.157058423	-2.866474865	6.697614353	-8.497817066	1.46x10^-6	6.43x10^-4	5.668666933
NUF2	7.123212105	6.619767667	4.661544167	5.360334000	5.477399333	6.523541167	11.714128330	11.855639170	9.651058583	10.648666610	9.045732932	10.805310830	4.659123003	8.290527908	8.467736605	1.52x10^-6	6.43x10^-4	5.632389913
KMO	10.657785830	10.607824280	11.258101670	11.321325000	11.236390830	9.789124000	7.383231917	8.013078250	8.960153396	8.028912888	7.442029417	8.062283076	-2.830143779	9.396686713	-8.463463315	1.53x10^-6	6.43x10^-4	5.627226963
E2F1	4.951204710	6.096521000	5.281976583	5.249242000	5.835130167	6.308749520	8.294209167	8.649371776	7.708055563	8.576332689	7.513666833	8.079454917	2.516377827	6.878659577	8.440022191	1.58x10^-6	6.49x10^-4	5.598864084
ASPM	5.675978417	6.593072333	4.267418167	4.028784750	6.729975000	6.783871083	10.800696660	11.382336920	9.809344849	10.303976330	9.420244001	9.923563648	4.593510443	7.976605180	8.388939915	1.68x10^-6	6.79x10^-4	5.536812404
NDRG2	14.747769170	14.723737500	14.266775000	14.501587500	15.006209280	14.928061490	11.149695000	11.861364370	12.853540830	12.273948330	12.593077990	12.717897680	-2.454102622	13.468638680	-8.311599099	1.86x10^-6	7.28x10^-4	5.442223131
KCND3	8.594054917	8.969453750	8.538427150	8.764312132	9.006009250	7.677437333	6.031554269	5.971377250	6.615803164	6.309442250	6.881272843	6.526327583	-2.202319529	7.490455991	-8.303511088	1.88x10^-6	7.28x10^-4	5.432286577
CYP4V2	11.770286560	12.417192150	11.919061670	11.008956700	11.971912810	11.910740030	9.282397167	9.847520833	10.119303170	8.915952083	9.757190806	9.236414736	-2.306561854	10.679744060	-8.274619527	1.95x10^-6	7.31x10^-4	5.396722244
CPEB3	11.352489170	10.877718330	11.249764410	12.016545000	11.937772500	11.298604460	8.446041333	8.441320750	9.457473808	8.615728685	9.728062603	9.229777833	-2.469081475	10.220941570	-8.264615238	1.98x10^-6	7.31x10^-4	5.384382014
BUB1	5.897898500	6.011799000	4.551905250	4.619561583	4.807203083	5.866644148	9.739297995	10.284678420	8.296710333	9.415950500	7.712349083	8.871775417	3.760958363	7.172981109	8.256183533	2.00x10^-6	7.31x10^-4	5.373971411
HAMP	15.916963330	16.694060830	15.146810830	17.130553430	15.859337500	15.745724170	9.228209797	8.203440583	10.089233720	12.914980830	11.075594820	7.868644750	-6.185557599	12.989462880	-8.217572272	2.10x10^-6	7.55x10^-4	5.326179379
AADAT	11.269313290	11.600547890	12.241519240	12.173990580	11.886447420	11.511562530	7.756861604	8.307112493	9.000490560	7.937953976	6.417326364	9.510976769	-3.625443199	9.967841893	-8.184725174	2.19x10^-6	7.68x10^-4	5.285368111
KIF4A	3.629731210	4.202582793	3.609237083	3.999560118	1.899813181	4.819880667	8.263521833	8.432431142	6.836254018	8.399964189	6.693584833	7.370474667	3.972570938	5.679752978	8.173369090	2.23x10^-6	7.68x10^-4	5.271225584
KBTBD11	11.890113330	10.940297600	12.088314040	12.717897680	12.055187100	10.785055830	8.064134369	7.927008987	9.136149500	9.519714663	7.715870373	8.021994917	-3.348665463	10.071811530	-8.163338394	2.26x10^-6	7.68x10^-4	5.258719515
SLCO5A1	9.571592833	9.306851583	10.402589920	10.092061330	11.648830000	10.563164860	7.044074946	6.967550500	7.624305583	7.044074946	7.035883417	7.932347571	-2.989475594	8.769443957	-8.117277524	2.40x10^-6	8.03x10^-4	5.201121041
GPSM2	4.690613250	4.042955167	4.811955500	2.682984774	2.147420850	3.091183333	8.364455822	8.081990889	6.758490610	7.976186958	6.797214735	7.476502754	3.997954816	5.576829554	8.077539899	2.53x10^-6	8.32x10^-4	5.151203661
GLS2	11.879411670	11.299608330	12.399553160	12.348023330	12.359456300	11.845901670	4.646387701	4.050166167	8.767443333	6.163525347	8.005996167	6.543615000	-5.659136791	9.192424015	-8.047822802	2.63x10^-6	8.51x10^-4	5.113736419
APOF	14.130512610	13.390674020	13.295041310	13.430131470	13.835945550	11.599694280	7.220837963	9.434018119	10.043835220	9.041693982	9.328564944	9.909018897	-4.117338354	11.221664030	-8.009324682	2.77x10^-6	8.68x10^-4	5.065022621
KPNA2	10.423828620	10.942605980	9.869732667	10.354764170	10.349128580	10.773960000	13.081599770	13.210399170	12.351690740	12.751822280	11.954900000	12.309672500	2.157677407	11.531175370	8.001535055	2.79x10^-6	8.68x10^-4	5.055141821
ANGPTL6	9.766912256	9.556516545	10.345714100	10.825738630	9.913069758	10.029998520	6.446917556	6.414298936	7.344452563	7.772074108	7.979023178	7.938275426	-2.757151340	8.694415964	-7.996522229	2.81x10^-6	8.68x10^-4	5.048778964
DLGAP5	5.309892379	5.986897750	5.207157750	2.979298083	5.261035783	6.058588875	10.161967330	11.424480000	9.442733833	10.139623510	8.164970667	9.498292917	4.671532938	7.469578239	7.983597049	2.86x10^-6	8.70x10^-4	5.032357263
ARHGAP11A	-0.107270027	2.339916489	1.027909096	2.210473740	1.904730992	1.963917798	6.000620255	6.170953627	4.824363113	5.862182273	4.173650071	4.896793158	3.764814068	3.439020049	7.953326402	2.98x10^-6	8.75x10^-4	4.993809828
PTTG2	7.484796155	7.574987083	7.412429727	7.547801462	8.486906011	8.336613366	9.896905583	11.137888300	9.682990167	10.687029690	9.825459628	10.308795940	2.449255917	9.031883592	7.947258319	3.00x10^-6	8.75x10^-4	4.986067712
UBE2T	7.957447037	8.397454167	8.082979838	8.386784167	8.474974917	9.395860583	12.319348690	12.480841670	11.344192940	11.988391670	10.145155830	11.235537500	3.136327931	10.017414080	7.936865237	3.05x10^-6	8.75x10^-4	4.972795890
GPR128	8.898202183	9.419473917	10.968680830	9.355576686	10.360461080	9.399702000	5.906221583	7.644227000	6.192902012	6.011265667	6.317121833	7.070895500	-3.209910518	8.128727525	-7.934381290	3.06x10^-6	8.75x10^-4	4.969621763
ERCC6L	-0.101205063	3.855902750	1.027909096	1.081779175	0.887888983	3.023041417	8.349016715	9.045096000	6.881272843	6.709084394	5.622287770	7.231292583	5.677122325	4.467780555	7.903325545	3.19x10^-6	8.99x10^-4	4.929866540
CHEK1	5.531139209	5.745471167	4.536530500	4.958113583	3.905187750	6.094367746	9.348936370	10.078426170	8.470157417	9.171732720	7.424401253	8.523770667	3.707769106	6.982352879	7.880281937	3.29x10^-6	9.14x10^-4	4.900283365
BDH2	13.132232500	13.474101550	13.418153330	13.439404170	13.507203330	13.745727880	11.170706670	10.344833750	12.258238330	11.160143400	11.466433550	10.968680830	-2.224631039	12.340488270	-7.866634165	3.35x10^-6	9.18x10^-4	4.882728467
HAO2	11.888428970	11.565376900	12.682115840	11.956445600	12.644283250	11.353071020	5.360334000	4.850710500	9.113238750	6.608685366	8.493342167	5.904192651	-5.293203023	9.368352084	-7.825219940	3.54x10^-6	9.57x10^-4	4.829302754
SRD5A2	12.209051670	12.435455830	12.890549170	12.725783330	13.446996670	10.360891080	6.106814667	6.524848000	7.202825685	7.233932500	7.524198333	9.907143167	-4.928160899	9.880707508	-7.741098519	3.97x10^-6	1.02x10^-3	4.720060889
ENAH	9.794646917	8.938970917	8.611040500	8.768731491	8.735988010	9.420909333	11.289842150	10.738710000	10.567862250	10.963163590	11.270686450	10.977840000	1.922969546	10.006532630	7.734228368	4.00x10^-6	1.02x10^-3	4.711096213
FCN3	13.458110080	13.571564430	14.047012500	11.751176670	12.538244970	13.720734170	8.780332417	7.447542667	8.447555343	10.463588640	10.147454000	8.040289491	-4.293346709	11.034467110	-7.723702319	4.06x10^-6	1.02x10^-3	4.697348429
C14orf68	13.123922570	13.345989690	12.643031670	13.044241670	12.756607900	12.272952730	8.152886124	7.187017796	10.682073610	9.323608425	9.821881667	7.947170478	-4.012018020	10.858448690	-7.718468701	4.09x10^-6	1.02x10^-3	4.690507254
PTTG3	5.585198500	5.525138833	4.609129583	4.327900833	5.999733115	5.277912333	7.774416918	8.496655417	7.424850167	7.978665639	7.165145219	7.508680333	2.503900082	6.472785574	7.717836960	4.09x10^-6	1.02x10^-3	4.689681213
AFM	13.715675800	14.921598460	14.968326030	14.471573020	14.648635800	14.367553020	8.958096403	9.802087200	12.257049160	10.756956720	8.895222767	11.354360000	-4.178264979	12.426427860	-7.711386931	4.13x10^-6	1.02x10^-3	4.681244229
C1RL	12.358281720	12.349384170	11.367901670	11.866192500	12.157580830	11.230805000	9.608236897	9.281635416	9.969796037	10.078426170	10.293769170	9.513652167	-2.097438339	10.839638480	-7.703384936	4.18x10^-6	1.02x10^-3	4.670769202
SLC22A1	13.027954170	13.256370000	14.279058900	13.931403920	13.967162500	12.492144310	6.841795833	5.861685206	10.371735610	8.307112493	9.334374500	9.079729333	-5.192943470	10.895877230	-7.686662417	4.27x10^-6	1.02x10^-3	4.648849964
FLVCR1	7.385198120	6.946237000	6.360833411	6.096521000	6.936484167	7.545231473	9.186657917	9.890414800	8.847370000	10.359723450	8.957552167	9.320146583	2.548559958	8.152697507	7.683468369	4.29x10^-6	1.02x10^-3	4.644658926
ROBO1	8.995686207	8.308889417	6.589514333	7.492483044	6.412867500	9.209703960	12.238496670	11.873603700	11.512509920	10.775207150	12.227265830	11.514215830	3.855359108	9.762536964	7.669422577	4.37x10^-6	1.02x10^-3	4.626212099
LOC100128311	8.983813667	8.596659667	9.805423979	9.619389000	11.130849720	10.082204580	4.901121917	6.394567553	6.908106818	6.187884250	5.780026667	7.025369472	-3.503543991	7.951284775	-7.665137104	4.40x10^-6	1.02x10^-3	4.620578393
PBK	4.115384583	5.798751667	4.559667750	4.741591534	6.072773250	7.377624833	10.183321080	11.673787320	9.638906167	10.357475500	8.371350333	10.622986750	4.697005589	7.792801731	7.661614622	4.42x10^-6	1.02x10^-3	4.615945810
TAPT1	10.367740750	10.211091670	10.296988670	10.447537150	10.475219950	10.253181120	8.693144870	8.229460833	9.061208176	8.030036500	8.637998509	9.146410917	-1.708916583	9.487501593	-7.650182241	4.49x10^-6	1.02x10^-3	4.600898674
ASPG	11.472482680	12.032715960	12.515346670	12.343476670	13.117757500	11.168250030	6.257580667	6.705144988	9.530772331	9.068230500	7.253581910	6.355654417	-4.579844115	9.818416193	-7.650089629	4.49x10^-6	1.02x10^-3	4.600776705
FCN2	11.912496670	9.819307750	11.579707500	9.074645663	10.984670830	11.956445600	5.763546333	4.078176386	4.527712667	7.766759000	6.584050000	5.854757583	-5.125378674	8.325189665	-7.626487498	4.64x10^-6	1.04x10^-3	4.569654138
ECT2	6.541168667	7.119931417	6.556742000	6.303377804	6.587647834	7.708516917	11.057362500	11.199666670	9.558868500	10.005406670	8.803070854	9.415707000	3.203782925	8.404788902	7.587573704	4.89x10^-6	1.09x10^-3	4.518171607
IDO2	9.717551171	9.991645500	10.548937610	11.515202750	11.240499530	9.597274917	7.233564833	3.223772583	5.937202167	5.664946500	3.137599679	6.130380667	-5.213940842	7.828214826	-7.542595035	5.21x10^-6	1.14x10^-3	4.458401547
ACOT12	11.902051660	12.553002900	11.842397230	11.780298530	11.811972180	11.995276350	7.456581180	9.038082053	9.494941898	9.548313040	9.358351991	10.059287630	-2.821573507	10.570046390	-7.526251177	5.33x10^-6	1.16x10^-3	4.436612679
ANPEP	11.272783740	11.085336310	11.201067140	10.984199880	11.548526820	10.742484690	8.760471690	8.449065742	8.806209247	10.177023740	8.998310501	8.557123913	-2.181032291	10.048550280	-7.496374311	5.55x10^-6	1.19x10^-3	4.396685144
ECHDC2	13.542515830	14.308383330	14.530059470	14.623027500	14.695996670	14.249427500	11.244682080	11.475564170	11.708188330	12.117020000	12.215744630	13.015581670	-2.362104905	13.143849260	-7.490094586	5.60x10^-6	1.19x10^-3	4.388276911
OIT3	11.560878700	10.730343590	12.173990580	10.040881020	10.780025000	11.843875000	6.069587750	7.126541000	4.571936628	8.597921045	7.341608333	5.416717642	-4.667613581	8.854525523	-7.484254195	5.65x10^-6	1.19x10^-3	4.380451932
ANGPTL1	9.004758130	8.332592526	9.199034499	9.795551006	8.844970107	9.891939803	6.443722194	5.034870968	7.417014571	6.306343953	5.358410196	5.072149620	-3.239389095	7.558446464	-7.476296659	5.71x10^-6	1.19x10^-3	4.369782648
MT1JP	10.685742240	14.218671580	13.437023640	13.259037500	11.760423130	12.518738330	6.667841750	8.931666167	8.704392333	8.687344333	6.376328583	8.205391667	-4.717778596	10.287716770	-7.422145088	6.16x10^-6	1.24x10^-3	4.296939682
LOC728148	6.145958888	5.900905500	9.001220917	8.390837167	6.717700109	5.846428438	2.984257792	2.237688342	2.456921450	0.102078833	2.742232833	0.132998375	-5.224478899	4.388269054	-7.415020415	6.22x10^-6	1.24x10^-3	4.287324873
GLRA3	8.707484036	8.512084514	10.244818810	9.712113333	10.397000170	9.147423000	5.852390750	6.441912592	7.373516368	7.034064333	6.333260696	6.795720833	-2.815009714	8.045982453	-7.410224225	6.26x10^-6	1.24x10^-3	4.280848316
NEK2	0.103028333	0.177961250	1.027909096	0.147304583	3.590537641	4.795256083	9.200839833	9.511517005	6.826504265	8.847769561	6.463319071	8.579531061	6.597913968	4.939289815	7.408111281	6.28x10^-6	1.24x10^-3	4.277994055
CYP1A2	13.390674020	12.762655000	10.923123850	12.269798040	13.514133330	12.188445830	9.409660738	8.315879833	7.278241302	9.167621167	8.668979917	9.851634014	-3.726135519	10.645070590	-7.400704192	6.35x10^-6	1.24x10^-3	4.267983214
CD5L	12.702469290	12.600463330	12.117020000	11.350030830	12.073285000	11.878725000	7.463760917	9.900202583	9.858736000	8.209667833	7.266904167	7.255341288	-3.794563445	10.223050520	-7.394494869	6.40x10^-6	1.24x10^-3	4.259585171
NOX4	3.742234064	0.177961250	4.156148107	1.663946550	2.838597675	3.408096833	7.772552250	6.469166583	7.816406326	8.414023398	6.808092833	6.705144988	4.666400317	4.997697571	7.392989826	6.42x10^-6	1.24x10^-3	4.257548792
UGT2B7	16.793626500	16.985042440	17.071018330	17.369974650	17.429469450	16.904734040	12.147489950	14.109675100	14.141579170	14.823410760	14.238265240	14.988238330	-3.017534480	15.583543660	-7.370625553	6.62x10^-6	1.27x10^-3	4.227251102
SHBG	11.616391200	11.096437700	8.949290000	10.647766670	10.217304580	10.306659920	6.760807917	5.530586935	7.161694833	7.679078083	7.920523583	6.593408333	-3.531291730	8.706662479	-7.356021078	6.76x10^-6	1.28x10^-3	4.207427430
IGFALS	11.363492540	13.370608330	13.743063330	14.228291700	14.555046670	12.905315830	8.620712983	5.771652208	9.755942583	8.959933574	8.904905760	8.767828667	-4.897473773	10.912232850	-7.325069150	7.06x10^-6	1.33x10^-3	4.165313586
SAT2	15.655935990	15.089022090	15.674963960	15.758678330	15.712556670	15.176704760	13.075342630	14.141579170	14.087482500	13.395118330	13.561224170	14.062703330	-1.790735278	14.615942660	-7.307325517	7.24x10^-6	1.33x10^-3	4.141109446
KIAA0101	8.787468159	9.105459844	8.875943108	8.588618500	8.841762206	9.914239250	11.500265000	11.832065000	11.981231690	11.253712500	10.283589060	11.147517500	2.314148281	10.175989320	7.301070393	7.30x10^-6	1.33x10^-3	4.132566066
NCAPG	7.360994866	8.271582167	5.428457043	5.048398929	7.652739500	8.730155857	12.046515830	12.950470000	11.137012500	11.377050830	11.427682380	11.046885170	4.582214727	9.373162090	7.299170759	7.32x10^-6	1.33x10^-3	4.129970395
CENPE	6.201633957	6.504885196	6.128867917	5.723308750	6.359525036	6.635612000	9.382476667	9.483535273	8.278565917	8.521994248	7.692366708	8.192836734	2.332990448	7.425467367	7.291264637	7.40x10^-6	1.33x10^-3	4.119161868
LOC100129113	10.173416560	11.962217910	11.705321670	11.907194140	11.326649170	10.984670830	7.909555750	8.486446021	8.919933667	8.735694296	8.353825206	9.699342750	-2.659112097	10.013689000	-7.290033098	7.42x10^-6	1.33x10^-3	4.117477413
PALM3	9.642401667	8.774824574	8.873476417	8.232585250	9.256259333	8.803070854	6.976575479	6.577459314	7.098339583	6.699449333	5.226855000	6.327214298	-2.446120848	7.707375925	-7.265928006	7.67x10^-6	1.35x10^-3	4.084463501
OIP5	6.548291167	7.226961333	6.897880583	6.394567553	7.444926917	8.666062872	10.987698620	10.783870830	10.293357120	11.118135000	8.931165780	10.377871950	3.218901480	8.805899144	7.264630423	7.69x10^-6	1.35x10^-3	4.082683986
SPC25	5.612956833	6.471135988	3.567763171	2.620249833	5.424217821	6.467355500	10.502579060	11.281498330	9.261099000	10.535192830	8.716393333	9.844267250	4.996225109	7.525392413	7.263985736	7.70x10^-6	1.35x10^-3	4.081799769
CAT	14.654142500	14.968326030	14.992747750	15.665416460	14.997115000	15.072200100	11.400361540	12.048670830	12.748154410	12.879856000	12.390999170	13.750928330	-2.521829594	13.797409840	-7.231451573	8.06x10^-6	1.37x10^-3	4.037099978
EFCAB6	3.755913118	3.774414417	4.266406750	3.275444221	2.817845500	3.258158917	1.853336471	-0.271067613	0.249255292	1.418712717	0.606910567	1.131250975	-2.693297419	2.178048444	-7.229645034	8.08x10^-6	1.37x10^-3	4.034613445
RAD51AP1	6.100089833	6.065172583	6.277719500	5.323803688	5.262509500	6.939896667	9.999578500	10.926955000	9.209703960	10.153562950	7.559706697	9.748581583	3.604816152	7.797273371	7.222467605	8.16x10^-6	1.37x10^-3	4.024729733
UGT2B28	13.804948330	13.501242500	14.833813330	14.294696670	14.599998330	13.882809360	8.843544081	10.191233100	11.476436670	11.467567610	10.517016670	11.880248330	-3.423577011	12.441129580	-7.221976716	8.17x10^-6	1.37x10^-3	4.024053480
POLA2	5.161174000	4.936276714	4.456966250	4.340107398	4.413181118	4.649016948	6.569424833	6.351442250	6.409662748	6.713739078	5.817660667	5.989011167	1.649036386	5.483971931	7.219116660	8.20x10^-6	1.37x10^-3	4.020112753
RACGAP1	7.428493583	6.526933250	6.338332167	5.764900333	6.099210667	7.712072559	10.758570360	10.819824170	9.011655333	10.145705500	8.642755833	10.309544160	3.303018799	8.296499826	7.192289969	8.52x10^-6	1.41x10^-3	3.983092121
JMJD5	9.530772331	10.089958920	10.697489170	9.901486051	10.510159870	9.530365735	6.845501500	7.823305333	7.961271057	7.603631945	8.257134833	8.419698250	-2.224948193	8.930897916	-7.190452264	8.55x10^-6	1.41x10^-3	3.980552296
SHCBP1	3.392938567	0.177961250	1.027909096	0.147304583	0.745147725	3.081755917	8.252795833	8.161853398	6.375403417	6.533228083	4.415074929	7.571667833	5.456167726	4.156920053	7.185030806	8.61x10^-6	1.41x10^-3	3.973056649
KIF11	5.479782750	5.502748500	5.688737917	5.417445916	6.403414917	6.182178212	8.876866872	8.575967250	7.120897340	8.260877417	7.635366250	7.846123191	2.273631685	6.915867211	7.173419315	8.76x10^-6	1.41x10^-3	3.956988426
RDH5	10.868765910	10.889445830	10.519632840	11.555778510	10.555447970	9.935465583	7.174523167	6.943128333	7.419868833	8.314247000	8.378500794	9.128692156	-2.827596062	9.306958078	-7.169382573	8.81x10^-6	1.41x10^-3	3.951397726
UROC1	8.206204750	7.953772011	9.505690557	8.887669054	9.152366374	7.743416083	3.866044750	4.261597790	5.757514250	4.964421417	6.750031174	5.142145500	-3.451227325	6.849239476	-7.159912586	8.93x10^-6	1.42x10^-3	3.938272967
MTHFD1L	6.169661250	6.529449406	6.024001074	5.812984833	5.240639333	5.913979750	8.210928677	8.414386689	7.600555709	8.241268617	8.358965917	7.127028074	2.043736339	6.970320778	7.143806698	9.14x10^-6	1.44x10^-3	3.915921439
KIF18B	3.616639123	3.956200000	1.027909096	0.147304583	1.999692050	4.144783826	7.886581917	8.558107992	6.479991750	7.181409083	6.868322061	7.197494683	4.879896468	4.922036347	7.128607293	9.34x10^-6	1.45x10^-3	3.894793386
COLEC10	7.340135000	8.084220800	9.071155583	8.619446841	6.924634638	8.622263500	4.967514833	5.035389500	5.312734250	5.864571333	5.607301333	3.886367417	-2.997996283	6.611311252	-7.124692436	9.39x10^-6	1.45x10^-3	3.889346073
C12orf48	4.547149917	5.385735637	4.339038250	4.272708250	4.716946533	5.422459560	8.188640083	9.371604333	7.130748417	7.989347527	6.506057083	7.801249009	3.050601384	6.305973717	7.123918751	9.40x10^-6	1.45x10^-3	3.888269269
NME1	13.791082500	13.660387280	13.957342250	13.913712930	13.723884270	13.818878330	15.103262500	15.167531670	15.401967500	15.241221420	15.078143820	14.627635830	1.292412530	14.457087520	7.099920268	9.73x10^-6	1.49x10^-3	3.854825259
KIFC1	1.225687064	0.177961250	1.027909096	0.147304583	1.004615255	3.510614625	7.581693277	7.551604583	4.954580076	7.243671333	3.991188716	7.616616398	5.307543752	3.836120521	7.082132071	9.98x10^-6	1.52x10^-3	3.829981723
ETFDH	13.281270490	14.092214430	13.610458970	13.874624660	13.733457500	13.570455830	10.033635250	10.585643580	12.308587500	10.905068660	11.447407500	11.845901670	-2.506039622	12.440727170	-7.048407992	1.05x10^-5	1.58x10^-3	3.782754944
FAM54A	5.473283333	5.684205228	4.302197083	2.667768917	4.571171750	5.298624099	9.294700833	9.540444000	6.955458250	8.952278583	7.978329250	8.751520167	3.912580112	6.622498458	7.029847108	1.08x10^-5	1.61x10^-3	3.756691615
EZH2	7.912197546	8.539202917	7.738634083	8.008187253	7.841850167	7.972000086	10.290923330	11.168250030	9.999578500	10.095737420	9.339880264	9.566009873	2.074717895	9.039370956	7.024897108	1.08x10^-5	1.61x10^-3	3.749732274
ANKRD60	5.526201440	4.823634739	6.431172824	5.952738511	6.517292414	5.516667163	0.067004467	0.141257917	2.693902558	1.757671054	-2.497450795	1.817974480	-5.131224568	3.229005564	-7.014357782	1.10x10^-5	1.61x10^-3	3.734902795
CCL15	11.443843970	10.936316080	11.040513090	9.934667583	10.490063670	11.022049670	8.493342167	8.267838548	8.784806073	8.685665750	9.221191417	9.347248948	-2.011226860	9.805628914	-7.013687856	1.10x10^-5	1.61x10^-3	3.733959618
PBLD	12.338242500	12.356922500	12.925451670	12.435455830	13.072157790	12.152045000	8.198578583	8.402445167	9.270395417	9.746778917	7.676746333	11.113880000	-3.478575146	10.807424980	-6.988530012	1.14x10^-5	1.66x10^-3	3.698492696
CDT1	6.207514417	6.814580833	6.885230083	6.949996348	6.685058776	7.110016355	9.932081806	11.006948160	8.465097167	9.681999500	8.580281417	9.364876917	2.729814692	8.140306815	6.982529914	1.15x10^-5	1.66x10^-3	3.690020188
TRAIP	6.237913917	6.051552250	5.921266833	4.912718917	6.605059250	6.721426250	9.414359241	9.692302167	7.932809583	8.698440250	8.087654583	8.514092500	2.648286818	7.399132978	6.971781323	1.17x10^-5	1.67x10^-3	3.674829295
TTK	4.614861026	1.833055308	1.027909096	5.644241167	1.069569989	4.370735833	9.460890267	9.785822333	7.409522638	9.106457151	8.110729333	8.854752932	5.694633706	5.940712256	6.968401701	1.18x10^-5	1.67x10^-3	3.670049395
SRPK1	11.515202750	11.799479170	11.364410510	11.499468550	11.512509920	11.669352900	12.782212480	13.134123270	12.983996670	12.469449610	12.659589170	12.964421670	1.272228177	12.196184720	6.963662036	1.19x10^-5	1.67x10^-3	3.663343119
RAD51	6.729155167	6.999653500	6.824678833	6.689172882	6.594174415	7.714144654	10.075413600	9.900720667	9.030461750	9.639109417	8.216420620	8.769396741	2.346757224	8.098541854	6.955641662	1.20x10^-5	1.68x10^-3	3.651987356
SMC4	7.242587871	7.372668167	7.564785750	7.048477664	7.218132451	7.530903583	9.196219417	10.194996320	9.062663235	9.160450750	8.657270388	8.679448282	1.828915483	8.244050323	6.950441425	1.21x10^-5	1.68x10^-3	3.644619468
EPHX2	14.954510830	15.072200100	14.718911960	14.960889690	14.937155000	14.351604310	11.812815830	12.717897680	12.429159170	11.727866670	12.914980830	13.759202520	-2.272224867	13.696432880	-6.932915322	1.24x10^-5	1.70x10^-3	3.619758521
MT1A	16.566785000	17.920167480	17.900984480	17.616495800	17.012093980	17.385194280	13.058595000	15.125190830	14.134694170	14.583177500	13.185719240	15.633437380	-3.113484484	15.843544600	-6.928852847	1.25x10^-5	1.70x10^-3	3.613989402
DBH	8.527221083	8.715569176	7.889203667	8.121306250	8.803479153	9.982164485	4.008981049	3.603459583	4.510253417	5.337485970	6.490909917	6.196178500	-3.648612563	6.848851021	-6.926415658	1.25x10^-5	1.70x10^-3	3.610527184
ENO3	10.628062500	13.641655720	14.201233170	13.627113330	14.434768960	13.363636670	8.227333500	10.169821170	9.301311858	9.013393000	9.337540317	9.841765250	-4.000884208	11.315636290	-6.920107937	1.26x10^-5	1.70x10^-3	3.601562505
NCAPG2	7.662049507	7.740989250	7.299473000	7.402879333	7.342988775	7.960299981	9.366983773	9.619808963	8.998969083	8.964635750	8.713805417	8.798454917	1.508996343	8.322611479	6.911341357	1.28x10^-5	1.70x10^-3	3.589093494
CACNA1F	8.121306250	8.025076369	8.985743417	9.037297833	9.475001167	8.492257667	5.413187686	6.166810250	6.992491062	6.662645678	6.483310083	6.784673500	-2.272260741	7.553316747	-6.907922628	1.29x10^-5	1.70x10^-3	3.584227844
NCAPH	6.158383911	6.155637089	4.313235833	4.243228624	4.374921583	5.831101586	9.640859667	10.266512720	7.815011457	8.852274000	7.638903702	8.858731083	3.665964000	7.012400105	6.903151074	1.29x10^-5	1.70x10^-3	3.577433924
SHMT1	11.167934350	11.449451370	12.038639170	11.634935000	11.441864910	10.662257500	7.423531167	7.656171369	8.373603417	8.097745237	9.289773417	9.984013667	-2.928374003	9.934993380	-6.902672312	1.30x10^-5	1.70x10^-3	3.576752059
GMNN	10.489328120	10.400388080	11.117345680	10.926370830	10.699518010	10.991805430	14.203026670	12.557928330	12.725783330	13.030256670	12.172258330	13.749258330	2.302292585	11.921938990	6.900350713	1.30x10^-5	1.70x10^-3	3.573445098
PCDH24	9.978763667	9.924295574	9.809767803	10.559621420	10.509402880	9.820821566	7.385671340	7.784131917	8.120662232	8.279184553	8.762141583	8.765923622	-1.917492944	9.141699013	-6.892321273	1.32x10^-5	1.71x10^-3	3.562001567
SHPK	10.821655830	10.831562500	10.744553330	10.942605980	10.773447680	11.090237500	9.103927168	9.943840917	9.418554590	8.939580405	9.777849046	9.099116433	-1.486865712	10.123910950	-6.887570307	1.32x10^-5	1.71x10^-3	3.555226022
AXUD1	9.504399194	9.842582583	9.738969000	9.700491668	8.335726500	8.278565917	7.091670000	7.046537333	7.358456802	7.078924631	7.050716000	7.103760333	-2.111778294	8.177566663	-6.877821690	1.34x10^-5	1.72x10^-3	3.541312680
PRIM2	7.726652240	7.410880833	7.405963000	7.206548083	7.032102833	7.733235907	9.413860599	9.880691479	9.058579218	8.756680750	8.614790540	9.880691479	1.848318528	8.343389747	6.855303399	1.39x10^-5	1.77x10^-3	3.509120570
E2F8	0.103028333	0.177961250	1.027909096	3.884382917	2.660396249	4.344754250	7.119342250	7.634146667	6.645374750	7.284618811	5.956287970	7.835634250	5.046162100	4.556153066	6.831084779	1.44x10^-5	1.82x10^-3	3.474413865
C1orf2	9.024665250	8.736849833	8.424403869	8.556834433	8.774336000	8.772016583	11.357217500	10.882941050	10.342555550	10.337632330	10.629531040	9.673351043	1.822353759	9.626027874	6.828477950	1.45x10^-5	1.82x10^-3	3.470672942
IGFBP3	14.206379170	13.379516670	12.767947500	13.640074980	12.886135000	14.157576670	11.083721670	10.927324170	11.651541670	10.748469770	11.589837780	9.673658480	-2.560512742	12.226015290	-6.818131085	1.47x10^-5	1.82x10^-3	3.455814764
ITIH1	16.352684520	16.517125060	15.970527130	16.461439180	16.659890430	15.196813330	12.785455290	13.872486640	14.728277280	14.051256350	13.204942500	14.074617710	-2.406907313	14.989626280	-6.817274507	1.47x10^-5	1.82x10^-3	3.454584000
CLEC1B	10.100819250	9.905820333	12.191065000	9.608907428	9.789529917	10.392442640	4.493002583	0.961759283	4.115384583	7.635366250	5.298285448	3.439201092	-6.007597555	7.327631984	-6.797366759	1.51x10^-5	1.85x10^-3	3.425949083
COMP	5.879404250	5.268159895	5.433561364	5.318456408	5.931458417	5.527317944	10.526609000	6.729803109	9.075915522	8.665016167	8.947049704	8.948611167	3.255774398	7.187613579	6.794900521	1.52x10^-5	1.85x10^-3	3.422397596
CARD14	7.653208424	7.527281750	9.191693480	9.202986028	9.324080833	8.302172000	5.591462250	5.981532522	6.497319500	6.482083966	5.527317944	6.157525545	-2.494030131	7.286555354	-6.792548770	1.52x10^-5	1.85x10^-3	3.419010134
NME2	15.411672500	15.303131180	15.512782500	15.523413520	15.326640830	15.553156330	16.833383850	16.488785630	16.809265000	16.937309100	16.517125060	16.315169170	1.211706825	16.044319560	6.786087817	1.54x10^-5	1.85x10^-3	3.409699542
ALDH8A1	11.479593780	11.572431440	11.671269250	11.553303710	11.891010060	10.306077600	6.201349362	6.752280669	8.752672483	7.596557290	8.042944966	9.648374112	-3.579917825	9.622322059	-6.785414288	1.54x10^-5	1.85x10^-3	3.408728593
PTH1R	7.861660022	7.613670333	7.593749478	8.247661500	7.664978500	8.049837417	4.889279983	4.998643076	6.201633957	5.793126250	6.452473238	6.296683250	-2.066619583	6.805283084	-6.780384802	1.55x10^-5	1.86x10^-3	3.401476025
GNE	13.380297500	13.329760000	13.286326670	13.532047850	13.633268000	12.710098330	11.751176670	10.319826500	11.371637500	9.823208583	10.882270000	11.737627500	-2.331008600	12.146462090	-6.766387007	1.58x10^-5	1.88x10^-3	3.381271257
SLC46A3	7.933248106	8.322131530	9.398347809	8.754387417	8.752672483	8.551941000	5.845633695	6.204818047	6.137611988	5.892442440	6.277719500	7.663524164	-2.281829752	7.477873182	-6.744817694	1.64x10^-5	1.93x10^-3	3.350080460
GRAMD1C	11.924960980	10.961904170	11.927837500	11.877064290	12.209051670	12.155313330	10.295042340	8.358631579	10.204102670	8.867565333	9.646112000	9.353802781	-2.388479206	10.648449050	-6.741153656	1.64x10^-5	1.93x10^-3	3.344775106
C8A	15.529077890	16.155597320	15.523413520	15.875747740	16.044883330	15.037449170	10.679657500	12.187305980	13.034332500	12.754430760	12.385719800	14.175931630	-3.158131798	14.115295590	-6.737533308	1.65x10^-5	1.93x10^-3	3.339531048
C1R	15.699783530	15.548478200	14.849058240	15.308929290	15.686269170	14.984121670	14.051256350	13.826692500	14.170062500	13.826692500	13.590170070	13.298225000	-1.552256863	14.569978250	-6.729303667	1.67x10^-5	1.94x10^-3	3.327603179
FAM111B	0.103028333	0.177961250	1.027909096	0.147304583	0.573751300	4.280812104	5.421509417	5.140039583	5.623263250	5.318456408	4.828336589	7.034064333	4.509150486	3.306369687	6.722976362	1.69x10^-5	1.94x10^-3	3.318425646
CRHBP	10.809452520	10.180806780	12.725783330	9.847520833	10.206110170	12.006300900	5.781256239	5.216383917	6.820976917	9.037923333	6.142515833	6.111992677	-4.444154269	8.740585287	-6.719988740	1.70x10^-5	1.94x10^-3	3.314090129
C13orf3	6.077315994	6.296683250	4.294081438	5.648870473	6.827048167	7.023808083	9.899419083	9.952284167	8.374857083	8.791223309	8.647073210	8.973250975	3.078383404	7.567159603	6.719110345	1.70x10^-5	1.94x10^-3	3.312815184
PRC1	7.711224500	8.321015060	8.336880750	8.504577390	9.023075336	9.144627792	11.022509110	11.519720910	9.883676417	11.286624170	10.441030770	10.326181710	2.239723709	9.626761993	6.711246479	1.72x10^-5	1.95x10^-3	3.301396058
CDC45L	7.384007833	8.212280917	7.347237321	8.243015710	8.615333708	9.243684250	11.184247500	10.827403330	10.168565300	10.331172830	9.965526583	10.459902250	2.315209676	9.331864795	6.699582303	1.75x10^-5	1.97x10^-3	3.284441494
PINK1	12.367007540	12.741241200	12.352559500	12.841619890	12.827063080	12.733647080	10.254441860	9.959579640	11.297588330	10.711085960	11.237416840	11.351816670	-1.841868167	11.722922300	-6.692953202	1.77x10^-5	1.97x10^-3	3.274796647
ACAA2	14.287483200	15.006209280	14.947839800	14.221282850	14.692425980	14.744203980	11.413120150	11.973501010	12.141837350	12.714635510	12.369174750	13.674156960	-2.268836563	13.515489230	-6.691460353	1.77x10^-5	1.97x10^-3	3.272623757
GRM8	8.476861000	9.473592519	8.524643073	9.043674167	8.485243000	8.816478918	6.990813036	4.707264908	5.637306318	5.410553506	6.440509917	7.178468712	-2.742596047	7.432117423	-6.690437751	1.77x10^-5	1.97x10^-3	3.271135136
FXYD1	9.583829801	9.892429333	10.897533920	10.461510670	10.673912500	8.877324193	4.828336589	5.188719592	8.252173984	6.114957583	4.425586945	6.951083083	-4.104280440	8.012283183	-6.678680066	1.81x10^-5	1.99x10^-3	3.254008004
RRM2	5.094547561	6.122622005	3.956200000	3.080822833	5.311992750	7.193077525	8.760018333	10.487236250	9.110204917	9.972388250	8.241268617	9.464810019	4.212777285	7.232932422	6.670826406	1.83x10^-5	2.00x10^-3	3.242556252
C6orf218	8.015166098	7.865673917	8.810389250	8.603025250	7.334869167	7.657363615	5.149734833	6.071393306	6.226557953	5.956287970	4.949794463	4.059310750	-2.645568003	6.724963881	-6.664539083	1.84x10^-5	2.01x10^-3	3.233381789
SKAP1	13.304665000	11.981231690	12.904179170	12.271878400	13.687112500	13.215638790	10.589089050	11.086318330	11.420065800	10.280718920	10.596944340	10.128613460	-2.210492606	11.788871290	-6.653202218	1.88x10^-5	2.03x10^-3	3.216824081
VSX1	8.677384917	8.966822464	8.766838750	9.048020917	9.898799791	9.199034499	5.685233583	6.445842083	6.907346333	6.464790000	7.612295167	7.579894127	-2.310250007	7.937691886	-6.639152094	1.92x10^-5	2.07x10^-3	3.196276894
SERF1A	8.530462952	8.206705917	8.772388832	8.767443333	7.973255167	8.136428665	9.799133000	9.860453750	10.326752030	10.072143330	9.672002667	9.494328928	1.473021473	9.134291548	6.627840296	1.95x10^-5	2.09x10^-3	3.179712794
C4orf19	9.272882250	10.000554440	9.979890968	9.739729333	9.797325049	9.308462750	8.729114417	7.796102576	8.303121000	7.667000000	7.283130565	7.614979167	-1.784232845	8.791024376	-6.619995739	1.97x10^-5	2.10x10^-3	3.168214581
STARD5	8.420658503	9.926013636	9.539878431	9.593613862	9.190390417	9.388930083	6.548462917	7.099496083	7.351601044	7.154469726	7.254962695	8.244917489	-2.067595830	8.309449574	-6.612067780	1.99x10^-5	2.12x10^-3	3.156584742
APOA5	12.647195130	12.787183720	12.931893210	12.833004550	12.923826210	13.042681450	8.337454498	8.409552260	9.808991063	9.464810019	9.733003061	11.877064290	-3.255818179	11.233054960	-6.583209346	2.08x10^-5	2.20x10^-3	3.114171475
ANLN	4.396598911	4.475547654	1.027909096	0.990301366	4.137778988	6.941974388	10.062414380	10.098081910	9.144627792	9.282123352	8.568009217	9.325948097	5.751849057	6.537609596	6.577834871	2.10x10^-5	2.20x10^-3	3.106258785
PLGLB1	13.143336390	13.532047850	14.104921710	14.097455000	13.811195830	13.811195830	10.381056750	10.779691920	11.073178330	9.796295031	11.699309170	7.836649583	-3.488995306	12.005527780	-6.571429557	2.12x10^-5	2.20x10^-3	3.096822751
CCT6A	12.342822500	12.188445830	11.712630000	12.089056670	11.639483950	12.180434170	13.967162500	13.706686080	13.336280730	13.598280000	13.446996670	12.919145910	1.470279795	12.760618750	6.571249439	2.12x10^-5	2.20x10^-3	3.096557320
GCUD2	5.274663000	6.047621191	4.409538917	3.380473484	4.964421417	5.488512250	9.268827167	9.486530750	7.380201750	8.591370717	6.981272786	8.322554690	3.410921267	6.632999010	6.553373277	2.18x10^-5	2.25x10^-3	3.070189804
C1QTNF6	7.333933333	7.708861167	7.023214667	6.676871917	7.437902667	7.881340500	8.975710151	8.648323000	9.040299167	9.150414518	8.632843467	8.779447072	1.527485521	8.107430135	6.536375545	2.24x10^-5	2.30x10^-3	3.045073387
FEN1	7.004988586	7.483764733	7.112851083	7.289494833	6.887887583	7.395237412	9.328974167	9.599919167	8.911524313	8.558733833	8.061424333	9.095696917	1.730341417	8.060874747	6.531986584	2.25x10^-5	2.30x10^-3	3.038581046
FTCD	12.628642280	13.493481900	14.281621670	13.623502740	13.902479370	12.977817290	7.473915083	9.366983773	11.179726720	10.339936550	10.192858370	10.746561670	-3.601260513	11.683960620	-6.527955973	2.26x10^-5	2.30x10^-3	3.032616237
PCCA	13.408902500	13.911294850	13.434703420	13.494535000	13.499591430	13.207083010	10.954969170	11.108382160	12.047671240	10.789380830	11.331087760	12.603218320	-2.020233455	12.482568310	-6.526594615	2.27x10^-5	2.30x10^-3	3.030601043
SLC18A1	10.488750080	9.724904893	10.829076150	11.122902500	12.102111790	11.038378330	5.838742738	7.059079833	8.904178417	8.379538750	6.689172882	7.900917383	-3.422415624	9.173146146	-6.507136903	2.34x10^-5	2.36x10^-3	3.001767601
CLYBL	9.922738791	9.983458000	11.236390830	10.609129420	10.386989890	9.906737791	7.430684333	7.592387167	7.836649583	7.453728165	8.296710333	9.342310833	-2.348829052	9.166492928	-6.501117851	2.36x10^-5	2.36x10^-3	2.992836702
RDH16	13.130925830	12.577883330	13.247995870	13.789232500	13.283055000	11.922232500	7.987118000	6.570105250	10.272847330	9.252152503	10.220297250	9.935465583	-3.952223187	11.015775910	-6.498594747	2.37x10^-5	2.36x10^-3	2.989091369
ADRA1B	9.709388459	10.285270150	10.104772820	10.633223870	10.191710470	10.573839290	8.918256207	6.400390530	8.276748604	7.182390239	7.942934367	8.101131471	-2.446058940	9.026671373	-6.494219457	2.38x10^-5	2.37x10^-3	2.982594345
MT1G	15.925766490	17.078890000	16.872188330	16.904734040	16.652505830	16.926862500	11.618355830	14.378178330	12.994441560	13.722245000	12.120108700	15.059098330	-3.411419906	15.021114580	-6.475446259	2.45x10^-5	2.42x10^-3	2.954684577
ARHGAP30	11.238536040	11.141649120	11.111932090	11.083165480	12.127264610	10.245597630	7.166389308	7.990883094	9.077938790	8.326558388	9.468317819	9.059327585	-2.643121663	9.836463329	-6.472217658	2.46x10^-5	2.42x10^-3	2.949879317
ASPA	8.963848250	9.470040707	10.144309750	9.677854824	9.217718583	8.746255830	5.720815000	8.027660750	7.584729000	5.941593833	6.315153833	6.708702392	-2.653562189	8.043223563	-6.461830731	2.50x10^-5	2.45x10^-3	2.934409346
PHACTR3	6.468339917	6.233469020	5.385985430	6.092153550	5.533846667	6.691608083	4.289424417	3.734026026	4.379157537	4.157198721	4.665470250	4.657234667	-1.753815175	5.190659524	-6.455219980	2.53x10^-5	2.45x10^-3	2.924555013
CAPZA1	11.319667500	10.989925830	11.650844680	11.291536170	10.954969170	11.487005830	13.292885770	12.903131820	12.610020000	12.765022500	12.252520500	12.488658330	1.436381622	12.000515680	6.453978114	2.53x10^-5	2.45x10^-3	2.922703086
SRD5A1	9.915118417	11.091519170	10.466955920	11.031511670	10.505325170	10.277654580	7.583908942	7.069882417	7.913326417	8.149703159	8.616041833	9.451110500	-2.417351942	9.339338182	-6.440156095	2.59x10^-5	2.49x10^-3	2.902075334
ACADS	9.141159742	9.367203428	10.824803240	10.396625240	10.126320230	8.995318113	5.883678071	6.092342191	6.275814410	8.131903310	6.516445562	7.874105842	-3.012856769	8.302143282	-6.438462916	2.60x10^-5	2.49x10^-3	2.899546478
STMN1	11.625425830	10.836440000	11.010970720	10.299780000	10.843388420	11.699309170	14.606424170	14.104921710	13.152072500	14.246245830	12.123452500	13.978459170	2.649376956	12.377240830	6.428911078	2.63x10^-5	2.50x10^-3	2.885272161
TDRD1	8.604669250	8.178883620	9.645839250	9.680337333	9.984013667	9.347987703	5.569865136	6.366103667	7.074220276	6.908106818	7.133191728	7.471549207	-2.486448998	7.997063971	-6.428139905	2.64x10^-5	2.50x10^-3	2.884119114
TK1	9.857580412	11.471270580	10.823507430	10.918236400	11.436531860	12.198925830	13.879809500	13.458110080	13.136708070	14.020973330	12.731059440	14.038703730	2.426551938	12.330951390	6.424307037	2.65x10^-5	2.51x10^-3	2.878386932
TPX2	7.086687667	6.922345106	6.356356991	7.044419083	7.877142583	7.293388583	9.733757954	9.051704083	8.278232918	9.646112000	8.690916583	9.098020167	1.986400615	8.089923643	6.409634666	2.71x10^-5	2.55x10^-3	2.856423379
CENPK	2.364411744	2.541559083	1.027909096	0.147304583	3.540432917	5.433064167	7.393241250	8.502437333	8.008832250	6.857505856	5.967904083	8.085806833	4.960174336	4.989200766	6.400900651	2.75x10^-5	2.57x10^-3	2.843333685
ACSM5	11.626167030	11.196456300	11.669352900	12.060665980	11.270686450	11.489165270	6.596735182	6.407943878	8.134693093	8.142835998	7.140543459	10.528492750	-3.726874927	9.688644857	-6.388057382	2.80x10^-5	2.61x10^-3	2.824064474
TMEM106C	12.545425830	12.245893330	12.275168970	12.195447500	12.506985380	13.262161670	13.745727880	13.973583790	13.843149110	14.035002500	14.157576670	13.661868330	1.397637598	13.203999250	6.375143322	2.86x10^-5	2.65x10^-3	2.804663878
C10orf65	9.825459628	9.526614860	10.581997580	10.078805870	10.290538250	9.112742055	5.263243624	5.856199025	6.646199583	5.803272233	3.584151833	8.373603417	-3.981581422	7.911902330	-6.371611271	2.87x10^-5	2.65x10^-3	2.799353333
RFC4	9.052747583	9.006009250	9.682439939	9.423936917	9.112742055	9.762410569	11.271560530	12.538244970	10.920282850	11.232300830	10.666820000	11.086318330	1.945873534	10.312984490	6.363493379	2.91x10^-5	2.67x10^-3	2.787140678
SGEF	9.761683657	10.616462310	10.966888250	11.333350170	10.888450830	10.399729580	7.039225931	7.329836329	8.922175000	7.832690857	8.846915667	8.866530880	-2.521531691	9.400328289	-6.358863419	2.93x10^-5	2.67x10^-3	2.780170840
ACSL1	15.021210390	16.053657580	14.958175470	15.561358540	15.285263930	15.303131180	10.401455780	12.595464340	13.315163280	11.416077150	12.465498390	13.565859780	-3.070546394	13.828526320	-6.358622285	2.93x10^-5	2.67x10^-3	2.779807753
CENPI	2.799045000	2.315426049	1.027909096	2.888037333	3.259433949	1.430637269	6.451438500	6.136877387	5.137341750	5.701710182	3.690250917	5.887141778	3.214045303	3.893770768	6.353220987	2.96x10^-5	2.68x10^-3	2.771672459
NPC1L1	9.520402597	8.849996500	8.648323000	9.311797667	9.774341413	8.576827560	7.634751861	7.751435417	7.374351167	7.515786153	7.736773051	7.079890833	-1.598116709	8.314556435	-6.344702431	3.00x10^-5	2.69x10^-3	2.758833048
NTF3	8.806601583	7.994679988	8.500300250	8.214949750	7.839100333	8.228443021	5.969623662	7.133606530	7.129602588	6.209216000	6.546524917	5.904663750	-1.781806246	7.373109364	-6.344389433	3.00x10^-5	2.69x10^-3	2.758361079
CA2	12.016545000	11.896844510	13.268740830	13.399404170	12.807140830	12.397302440	9.704840899	8.752672483	10.337029250	10.580243500	11.108382160	9.968825170	-2.555664053	11.353164270	-6.333809016	3.05x10^-5	2.72x10^-3	2.742398158
KLHL2	9.792461718	9.755942583	9.990951833	9.764712958	9.714813000	9.649823673	8.129564951	8.360575417	8.649371776	7.708055563	8.017567748	9.024273515	-1.463216133	9.046509561	-6.317321506	3.13x10^-5	2.78x10^-3	2.717489238
C6orf48	13.363636670	12.789758330	12.906254170	13.147945000	12.477708750	12.649283310	14.351604310	14.316076670	14.864347460	14.629980090	14.191391670	13.802787500	1.470266912	13.624231160	6.312812867	3.15x10^-5	2.79x10^-3	2.710670522
ACAD11	11.211304950	11.155466720	10.109517930	11.040513090	10.779691920	10.351495180	7.600555709	8.581196260	8.454738784	7.184754124	7.807123926	9.777849046	-2.540295324	9.504517303	-6.307553901	3.17x10^-5	2.80x10^-3	2.702713140
PCK1	15.466083040	15.621394690	14.818650000	15.401967500	14.067545130	15.110045880	9.719322917	12.445502500	11.455544170	11.084090000	8.868323667	13.026656550	-3.981041074	13.090427170	-6.304941678	3.19x10^-5	2.80x10^-3	2.698759005
RPL22L1	14.167545310	13.707856670	13.707856670	13.478324170	13.414450860	13.890457500	16.162906730	16.060227690	15.755335000	14.344739030	16.044883330	15.574216200	1.929302801	14.692399930	6.298650095	3.22x10^-5	2.81x10^-3	2.689231158
HGFAC	9.641688333	9.433493566	10.640956750	10.162640960	10.433678450	7.187492667	5.046008750	5.261035783	7.323454583	5.912700000	4.865561750	3.271213917	-4.303329323	7.431660459	-6.291564600	3.25x10^-5	2.82x10^-3	2.678493835
TAS2R41	6.555640167	6.240982086	6.867355667	6.762280800	6.531312750	4.988619833	3.065809303	4.452845387	4.801898945	4.160975524	3.552764052	3.928239349	-2.330609790	5.159060322	-6.290408328	3.26x10^-5	2.82x10^-3	2.676740903
C16orf45	9.900720667	10.338253170	10.670408830	10.479703380	10.546053920	10.494345810	8.090194299	7.944823333	9.324633083	8.955049750	8.651331538	9.163797391	-1.716609396	9.546609597	-6.271161981	3.36x10^-5	2.87x10^-3	2.647533254
CENPH	6.616653833	6.358541046	7.394896670	7.058393833	7.143999000	7.635366250	9.021421167	9.329310167	8.501773783	8.915386000	8.079050180	9.364358750	1.833908236	7.951595890	6.270361580	3.36x10^-5	2.87x10^-3	2.646317373
LOC100144602	7.846996243	7.829695167	8.993644516	8.934585326	7.267278333	8.420243722	6.328678094	5.690882833	6.640288459	6.192464750	5.057611750	6.048228731	-2.222381448	7.104216494	-6.268805924	3.37x10^-5	2.87x10^-3	2.643953914
CNDP1	10.734749170	10.600119890	13.529635830	12.945416670	12.668184170	8.105328996	6.307097417	6.043393083	6.989953833	7.004619833	6.985074167	6.409084750	-4.807368606	9.026888150	-6.262605810	3.40x10^-5	2.87x10^-3	2.634530625
DTYMK	10.313579000	10.501024000	10.814354750	10.649638330	10.874070000	10.828140000	12.736941670	12.762655000	11.938945440	12.126401670	11.643268330	11.848465000	1.512645171	11.419790270	6.262355397	3.40x10^-5	2.87x10^-3	2.634149910
PSMC3IP	5.817941583	5.835615000	3.672267833	4.915620083	5.031306813	5.854757583	8.702654667	8.434576750	7.421489528	7.460865833	6.935149667	8.254004616	2.680205361	6.528020830	6.260684660	3.41x10^-5	2.87x10^-3	2.631609566
LPIN2	11.483219170	12.375368160	10.916837500	11.980340000	12.023411570	11.757654020	9.861627327	10.299780000	10.247811670	9.108565417	10.298215850	9.743731333	-1.829516470	10.841380170	-6.260286220	3.41x10^-5	2.87x10^-3	2.631003679
GCDH	11.427682380	11.779477240	11.617530830	11.266967500	11.636008040	10.880176770	8.526260250	8.477064333	8.926600250	8.802324989	8.963452500	10.849152970	-2.343831246	10.262724840	-6.256140195	3.44x10^-5	2.88x10^-3	2.624697595
CYP2A13	14.284000590	13.467075000	13.504514170	14.574587500	14.614287500	13.792820480	7.255341288	6.209577417	11.175625830	9.591750083	10.148682850	10.837346080	-4.836493615	11.621300730	-6.250567340	3.47x10^-5	2.89x10^-3	2.616217198
KIF18A	0.103028333	0.177961250	4.864258833	0.147304583	0.403919374	3.815553500	8.244449250	8.250072583	6.392479747	7.470390083	5.342658167	7.655369583	5.640565590	4.405620441	6.240302523	3.52x10^-5	2.92x10^-3	2.600584543
HMGCL	12.242295680	11.975282330	12.808309710	12.891994170	12.727263330	12.301372500	9.308220417	9.591750083	9.891503083	10.925588330	9.796731917	11.521327440	-2.318566075	11.331803250	-6.230137938	3.58x10^-5	2.95x10^-3	2.585088764
ZFP36	13.580874170	13.386704170	13.135086070	13.055729740	12.413379170	12.421824020	11.679770320	10.854465830	11.694800830	11.238174970	11.513384170	10.844621620	-1.694729930	12.151567920	-6.229694910	3.58x10^-5	2.95x10^-3	2.584413016
ABAT	13.480003970	13.266270240	13.404418690	13.606414610	13.776764350	12.682115840	9.642930994	9.023075336	10.949301410	10.078805870	10.884491550	12.272952730	-2.894071636	11.922295460	-6.223600408	3.61x10^-5	2.96x10^-3	2.575114090
NRIP3	9.646112000	9.575127291	10.197214000	10.265989750	11.355895730	10.379218170	7.276978917	7.969409167	8.074466221	7.863377583	8.672411917	8.765460000	-2.132908855	9.170138395	-6.220575316	3.63x10^-5	2.96x10^-3	2.570496341
INCENP	4.198164128	4.249019505	3.743578667	4.023398593	3.091183333	3.778685914	7.298141250	7.175508667	5.410993508	6.425427447	6.044263723	5.170353000	2.406776242	5.050726478	6.216991735	3.65x10^-5	2.96x10^-3	2.565024269
IGF1	12.085982500	12.313887970	12.492144310	13.336280730	13.535320830	12.519555000	9.055456414	8.396161333	10.597819000	8.770877250	10.799286960	10.769695000	-2.982312563	11.222705610	-6.213150671	3.67x10^-5	2.96x10^-3	2.559156859
SDS	10.682073610	13.485371670	12.957574170	12.374307420	12.510857840	12.484337500	6.627025250	7.654122250	8.398026235	9.171469658	9.498039833	10.300069670	-3.807628218	10.511939590	-6.212016661	3.68x10^-5	2.96x10^-3	2.557424175
GCKR	9.450152667	10.017721510	10.822378650	10.690804170	10.247811670	9.066290667	6.241392979	5.763871954	7.432882578	7.429163000	7.220837963	8.646810217	-2.926700106	8.585843168	-6.210699947	3.69x10^-5	2.96x10^-3	2.555412089
SPC24	4.617670000	4.930946667	5.655250787	4.513050359	5.488041667	5.530175238	6.831336083	8.290415035	6.166810250	7.831754667	7.489709250	7.711224500	2.264352511	6.254698709	6.203335328	3.73x10^-5	2.98x10^-3	2.544153264
CHAF1B	6.360421833	6.700477083	5.903841437	6.424021309	6.415315667	7.432882578	9.216518333	9.155461575	7.726366917	8.638387667	8.001826629	8.516848480	2.003074949	7.541030792	6.199323144	3.75x10^-5	2.99x10^-3	2.538016080
MYH7	6.333710541	6.096085733	7.285104917	7.230819698	5.866644148	7.371900000	4.302197083	4.307222260	4.996068851	4.303403359	3.723073016	5.331503081	-2.203466231	5.595644390	-6.192153886	3.80x10^-5	3.01x10^-3	2.527043630
GGT8P	8.651859909	7.542848583	9.415193164	9.553132833	10.592889140	9.526209304	4.716384647	5.858452417	7.359455917	5.204950833	5.406223167	6.690487673	-3.341029713	7.543173965	-6.186469050	3.83x10^-5	3.03x10^-3	2.518337513
MMP19	10.256431580	11.184961770	10.514118580	11.167934350	11.264811670	10.672332500	9.613193333	9.507644302	9.715890797	9.080467586	9.142744333	8.906805417	-1.515640780	10.085611350	-6.181183024	3.86x10^-5	3.04x10^-3	2.510237752
ESR1	9.073350333	9.166410495	9.627886667	9.534077569	9.952284167	8.427364750	5.884372827	5.796119583	6.348487833	6.033976833	6.523101833	8.553124500	-2.773698428	7.910046449	-6.179145871	3.87x10^-5	3.04x10^-3	2.507115094
TMEM74	3.151595000	0.177961250	3.592795417	-0.042855307	2.703843917	0.706896083	4.236870583	5.536298583	6.981604222	7.322646417	6.932072950	7.228130167	4.657897760	4.043988273	6.171713578	3.92x10^-5	3.06x10^-3	2.495717129
CSE1L	11.457083330	11.416990440	11.706083330	11.472482680	11.392985830	11.402604170	13.140803330	13.201045000	12.596988330	13.112397500	12.089056670	12.876845830	1.361484480	12.155447200	6.169579889	3.93x10^-5	3.06x10^-3	2.492443408
MCM8	7.507611000	6.934565021	7.121322667	6.600820750	6.460133449	7.888440667	9.220325083	9.104365917	8.792160667	8.970583500	8.079876321	9.070573845	1.787498630	7.979231574	6.155059733	4.02x10^-5	3.10x10^-3	2.470146745
MAD2L1	7.019135314	7.100473265	7.577868667	7.166389308	6.862122695	8.091824000	10.571372770	12.005377390	10.201765070	10.157290310	8.467630333	9.851058850	2.906113578	8.756025664	6.154788906	4.02x10^-5	3.10x10^-3	2.469730567
ATF5	10.077858590	11.145420830	11.298604460	11.580140270	11.448196670	9.028160500	7.513449457	7.400377906	9.316663608	7.744757119	7.481728750	7.257667250	-2.977289538	9.274418784	-6.148412848	4.06x10^-5	3.12x10^-3	2.459929315
CEP55	6.117690497	5.775057250	5.885343000	2.691542333	5.775861833	6.461196513	11.798191530	10.463588640	9.253935583	10.205745990	8.509851922	8.450962870	4.329264186	7.615747331	6.144802180	4.09x10^-5	3.13x10^-3	2.454376268
MT1H	16.346064520	17.818158490	17.762479640	17.514198330	16.926862500	17.283391740	12.190271090	14.818650000	13.640074980	14.238265240	12.336943330	15.680436670	-3.457752319	15.546316380	-6.142007285	4.11x10^-5	3.13x10^-3	2.450076482
TUBA1A	10.354764170	10.020280020	10.680311670	10.302997080	10.267612150	10.276167820	11.672987500	11.576311670	11.741614170	11.967302500	11.144767750	11.260880000	1.243621781	10.938833040	6.139224854	4.12x10^-5	3.13x10^-3	2.445794693
DTL	5.501661250	6.933521701	5.479260797	5.992180250	6.790400500	7.725643679	9.478916626	9.608907428	8.616502190	8.819794417	8.044973167	9.333754548	2.580030033	7.693793046	6.135152879	4.15x10^-5	3.13x10^-3	2.439526344
SLC25A20	11.679770320	11.992566670	12.249670930	11.823385830	11.803952770	11.659685830	9.769366000	9.626296417	11.002063330	10.329260280	10.587113750	10.512419200	-1.563752230	11.086295940	-6.133334026	4.16x10^-5	3.13x10^-3	2.436725610
RDBP	12.464157500	11.933295830	12.336943330	12.309672500	12.031745040	12.268939170	13.163821340	13.467075000	13.215638790	13.579173910	13.737271730	14.218671580	1.339483161	12.893867140	6.132589173	4.17x10^-5	3.13x10^-3	2.435578514
EXO1	4.420355750	4.801233750	1.027909096	1.816351075	3.797961145	5.897898500	9.637965250	10.107525430	8.162261216	8.673413637	6.559690417	9.218432750	5.099596564	6.176749835	6.130711296	4.18x10^-5	3.13x10^-3	2.432686151
GADD45B	13.647519170	14.471573020	14.101645830	14.147619990	13.645805830	13.026656550	11.941032500	12.697113330	12.490677700	11.691488710	12.163920000	11.914750830	-1.690306221	12.994983620	-6.124934934	4.22x10^-5	3.13x10^-3	2.423785863
MAN1C1	11.547729170	11.167084170	11.350030830	12.506985380	10.742484690	10.797386670	8.700464167	8.452040833	9.916937500	9.645296667	8.686602333	9.556125254	-2.192372359	10.255763970	-6.120849071	4.24x10^-5	3.13x10^-3	2.417487253
RTKN2	3.227117646	4.264145917	1.027909096	0.147304583	0.000000000	2.622062333	6.421613188	7.540000802	6.106814667	7.385460847	5.328353687	5.533846667	4.504591714	4.133719119	6.119997533	4.25x10^-5	3.13x10^-3	2.416174234
CIDEB	10.786894170	11.081261670	11.799479170	11.148639170	11.232962270	10.151265250	6.566734000	7.781973583	8.393241497	8.722486574	7.716345417	9.804688726	-2.869171981	9.598830957	-6.119984731	4.25x10^-5	3.13x10^-3	2.416154493
RBM3	11.899069710	11.522184170	11.964615000	10.903501670	10.918877240	11.811181810	14.189631670	13.482231300	13.429135830	13.702353330	13.042681450	12.534534170	1.893523025	12.449999780	6.116020739	4.28x10^-5	3.14x10^-3	2.410040807
TTC13	7.385460847	7.582099000	6.279006083	6.634148676	6.744110250	7.163866250	9.072775961	9.213936667	8.397134012	9.534077569	8.057296474	8.786511000	1.878840096	7.904201899	6.112595920	4.30x10^-5	3.15x10^-3	2.404756767
DCUN1D3	11.017105340	11.490691670	10.438985500	11.228439760	10.958235670	11.041896670	9.700276030	9.740922167	9.909948000	9.474013636	9.979437307	9.797802738	-1.262159121	10.398146210	-6.105108310	4.35x10^-5	3.16x10^-3	2.393198165
SLC7A11	0.965857133	0.177961250	1.027909096	3.006853083	3.503087000	0.392583142	5.855214167	4.457492833	5.145990833	4.214778500	5.346185333	5.061239908	3.501108478	3.262929357	6.103794122	4.36x10^-5	3.16x10^-3	2.391168576
PLCB1	8.650835642	8.444332656	8.508464000	8.589777416	7.847646750	7.887632322	9.685626917	9.886079975	9.760463000	9.278750583	10.608118330	10.133701000	1.570675171	9.106785716	6.101291381	4.38x10^-5	3.16x10^-3	2.387302700
MT1B	16.277708490	17.297777550	17.033241410	17.159998330	16.793626500	17.071018330	12.177695790	14.906948580	13.543991670	14.077385900	12.487595830	15.495309170	-3.157407281	15.360191460	-6.097599274	4.40x10^-5	3.16x10^-3	2.381597923
CBX1	9.918722083	9.698865583	9.688590093	9.373794500	9.530772331	9.804688726	10.858398330	10.965258330	10.876096500	10.935484170	10.615693370	10.436944920	1.112073718	10.225275750	6.097236096	4.41x10^-5	3.16x10^-3	2.381036656
ADAMTS17	6.572273299	6.223073043	6.745469973	6.876731405	8.925857324	7.813883483	4.664289456	5.194352892	4.216715131	4.635402310	4.328760144	4.908726395	-2.534840366	5.925461238	-6.095808409	4.42x10^-5	3.16x10^-3	2.378830061
MT1E	15.222288330	16.937309100	16.103330820	16.541165000	16.017765830	16.336328060	11.223053330	14.077385900	12.114006670	12.931893210	11.218318800	14.530059470	-3.510578296	14.437742040	-6.084898625	4.49x10^-5	3.20x10^-3	2.361957964
RCAN1	12.966659170	13.166491240	13.628695830	13.568243330	12.169652500	13.109287500	9.633488833	10.557207420	10.898039490	10.494345810	9.972668000	12.205456670	-2.474637227	11.864186320	-6.082990915	4.51x10^-5	3.20x10^-3	2.359005813
CDC6	5.047934250	5.728587750	1.027909096	4.214778500	5.209887170	7.205253917	9.203911904	10.029630250	9.519714663	9.152366374	9.143810000	9.874734583	4.748302849	7.113209871	6.073823788	4.57x10^-5	3.23x10^-3	2.344812097
RAD54L	4.384893250	5.685233583	4.585845750	3.408096833	4.967514833	5.998622076	9.614479791	9.481243500	7.477347750	7.728958833	6.925082041	7.833109083	3.338335779	6.507535610	6.073212920	4.58x10^-5	3.23x10^-3	2.343865820
ADHFE1	10.626982380	10.572478250	11.227519680	10.855043730	11.130257100	10.217304580	7.428948781	8.149388244	8.744296003	8.113688259	8.431504134	10.025715550	-2.289340791	9.626927224	-6.065676826	4.63x10^-5	3.25x10^-3	2.332187205
POLE2	4.975300686	5.204150993	6.239242670	6.046138423	6.350359583	6.422932017	7.551604583	8.387003048	8.449807167	8.241917250	6.982256250	8.123684000	2.083024654	6.914533056	6.064455796	4.64x10^-5	3.25x10^-3	2.330294174
LARP2	10.187810850	10.270559720	10.503333140	10.834534340	10.417648080	9.824108250	8.616890750	9.302124083	8.731607083	8.318292099	9.071933917	9.254187000	-1.457159909	9.611085777	-6.058369229	4.68x10^-5	3.26x10^-3	2.320854441
VIPR1	7.497257583	7.776311333	7.114713288	7.688267500	6.892346117	8.070787333	4.235075500	-0.141632694	3.753644426	3.284733443	2.872166167	5.307717418	-4.287996482	5.362615618	-6.054315396	4.71x10^-5	3.26x10^-3	2.314564177
RSPO3	9.563735051	9.434897621	8.395744667	8.844473417	8.901043083	9.059810417	6.953102167	4.451019250	6.888127000	6.896656500	7.129602588	5.439664500	-2.740255375	7.663156355	-6.052010094	4.73x10^-5	3.26x10^-3	2.310985962
AZI1	8.498082083	8.049122889	7.790295083	8.181714167	7.951937583	8.093562557	9.016037420	9.339880264	8.949802083	9.407625500	9.507994667	9.286041083	1.157111109	8.672674615	6.051460492	4.73x10^-5	3.26x10^-3	2.310132770
CARTPT	7.300205048	7.446969956	9.037923333	9.252962466	8.688138047	7.511101167	5.046522250	5.260418052	6.300060831	6.450964750	5.482527750	5.798256270	-2.483091686	6.964670827	-6.051153252	4.74x10^-5	3.26x10^-3	2.309655794
PLIN	6.793296467	9.586137083	9.375889703	8.592204500	6.841483000	7.518167167	4.099481167	6.157940833	4.557521010	4.573860333	3.338472265	4.788375500	-3.531921135	6.351902419	-6.045845527	4.78x10^-5	3.28x10^-3	2.301413555
ANXA10	13.185719240	13.038628740	14.540821060	13.217086270	13.342613120	11.891010060	8.599427022	8.636044159	11.888428970	8.737194764	10.366620460	9.781297326	-3.534477632	11.435407600	-6.038534600	4.83x10^-5	3.29x10^-3	2.290053576
MT1X	16.211703330	17.569848110	17.595155000	17.385194280	16.844230410	17.189527180	12.059000000	14.695996670	13.506098330	14.114348330	12.196683700	15.640277500	-3.430542297	15.417338570	-6.036611586	4.85x10^-5	3.29x10^-3	2.287064177
NDC80	8.084482417	8.576332689	6.546920703	6.260816073	7.648137645	8.493342167	11.039871820	11.092149170	10.175586730	10.431736670	10.157963320	9.311797667	2.766512279	8.984928089	6.036596490	4.85x10^-5	3.29x10^-3	2.287040707
SFRP4	5.159976000	2.341542250	3.428992333	0.147304583	0.000000000	4.760225500	10.095232310	6.383652000	11.422276280	10.339004750	9.052357000	7.440247417	6.482454848	5.880900868	6.023655658	4.95x10^-5	3.34x10^-3	2.266909040
RECQL	8.542364215	8.665612583	8.536610299	8.457878234	7.931224694	8.785223833	9.800430615	9.404501543	9.754133140	9.475446973	9.752350566	9.779783083	1.174622010	9.073796648	6.022185723	4.96x10^-5	3.34x10^-3	2.264620695
LRRN3	7.352533529	6.406166667	6.788219917	7.070895500	7.091023750	6.846815897	5.873832228	5.179363333	5.962100667	5.672666718	5.396592774	5.092969188	-1.396355058	6.227765014	-6.017003136	5.00x10^-5	3.36x10^-3	2.256549999
ITGA6	10.160180670	10.179305260	9.521571024	9.484056167	10.140012520	10.912410940	11.203581670	11.982273330	11.867196840	11.369143330	11.811181810	12.102111790	1.656325367	10.894418780	6.012189160	5.04x10^-5	3.37x10^-3	2.249049671
UHRF1	6.021832750	6.485922250	5.133695250	5.319277250	6.438291273	6.902447314	8.856795250	9.018856250	8.026950667	8.733595843	7.720763622	7.493976417	2.258245327	7.179367011	5.986051666	5.25x10^-5	3.49x10^-3	2.208265123
RILP	11.440039170	11.601147500	11.739930550	11.686009170	11.753108330	11.533607340	9.967749417	9.656274417	10.069846750	10.570795830	10.941945000	10.325564770	-1.370277647	10.940501520	-5.985290705	5.26x10^-5	3.49x10^-3	2.207076176
UCK2	9.476981917	9.682439939	9.036141251	9.869322535	8.803070854	9.064789250	11.588717510	11.566161670	10.510986290	11.241846670	10.548937610	10.635673220	1.693262868	10.168755730	5.984201294	5.27x10^-5	3.49x10^-3	2.205373895
CD244	8.767828667	7.873270500	8.163280333	8.096482520	8.745346250	7.677199766	6.639770667	7.011355833	7.180834817	6.483310083	6.724430583	6.497319500	-1.464397759	7.488369127	-5.982717235	5.28x10^-5	3.49x10^-3	2.203054658
ACAA1	14.864347460	15.004101120	14.972126250	14.856110710	14.975404680	14.661967260	11.854175280	12.099205090	12.279283130	12.875373060	13.482231300	14.081664770	-2.110354140	13.833832510	-5.978263077	5.32x10^-5	3.50x10^-3	2.196091844
COG5	8.436873333	8.121616500	8.771873462	8.297925917	8.534250841	8.452778583	9.506034884	9.328194042	9.409994917	9.484663913	9.564497250	9.500857278	1.029820608	8.950796743	5.967209453	5.41x10^-5	3.54x10^-3	2.178799604
GADD45G	10.530548250	12.261441000	12.894254430	11.691488710	12.698902500	11.507493330	9.073350333	8.952783250	9.308462750	8.789956500	9.992305333	10.388713780	-2.513092711	10.674141680	-5.966359120	5.42x10^-5	3.54x10^-3	2.177468579
SLC35D1	10.101816730	10.767800830	10.147454000	10.868765910	10.876096500	9.658775464	7.965639614	8.010336833	8.894764250	8.786857504	8.695265472	9.256259333	-1.801931073	9.502486038	-5.961943960	5.46x10^-5	3.56x10^-3	2.170555761
OGDHL	13.840937980	14.101645830	13.317289080	13.858380000	13.868217500	13.336280730	8.579882389	7.000672667	9.959579640	9.618463500	11.899069710	11.208310830	-4.009462062	11.715727490	-5.954734198	5.52x10^-5	3.58x10^-3	2.159261069
LILRB5	9.335726167	9.295279000	9.700491668	8.662279083	9.166410495	9.354201589	7.403282820	8.545710201	7.861382583	7.542588054	7.204784333	7.026876870	-1.654960523	8.424917739	-5.953667935	5.53x10^-5	3.58x10^-3	2.157590008
EEF1E1	10.067990330	9.847848103	10.711085960	10.280718920	9.752350566	10.132326920	11.480161190	11.511562530	11.217720000	11.637804170	11.004635830	11.659685830	1.286541460	10.775324200	5.947128308	5.59x10^-5	3.61x10^-3	2.147337246
GBA3	13.175849770	13.783385850	14.812475000	13.923926010	13.861452500	12.688900000	7.743737064	8.150153309	12.544230000	8.818230051	8.991040083	6.039859167	-4.993123244	11.211103230	-5.939072858	5.66x10^-5	3.62x10^-3	2.134699062
PPIL1	10.271335650	10.524658210	10.543181510	10.665842360	10.106421370	10.293563140	11.390447540	11.793107500	11.453250000	11.554244790	11.174989170	11.754487500	1.119254044	10.960460730	5.938672583	5.66x10^-5	3.62x10^-3	2.134070813
RP1-21O18.1	6.867355667	6.215850010	5.144573754	5.683150583	5.556194784	5.447067802	4.039798417	3.075223137	2.217987075	4.513050359	3.626696741	2.743725250	-2.449618604	4.594222798	-5.938591173	5.66x10^-5	3.62x10^-3	2.133943034
SLC22A10	10.110437560	11.640364170	12.351690740	11.652233430	12.777801340	11.568671950	6.082723961	7.291865417	10.101227920	8.147369456	8.742309833	7.920523583	-3.635863167	9.865601612	-5.935406923	5.69x10^-5	3.63x10^-3	2.128944317
C13orf34	7.236276083	7.014126510	6.487881000	5.703824000	6.383652000	6.949996348	9.317335307	9.447465930	8.206705917	8.284217433	8.066646224	8.364601453	1.985202720	7.621894017	5.925988427	5.78x10^-5	3.67x10^-3	2.114149907
ZWINT	7.436085549	8.119714491	7.756861604	7.462894833	7.891351001	9.464810019	11.516974170	11.798191530	10.327365420	11.849531100	9.188221750	10.846872740	2.899239869	9.471572851	5.922893542	5.81x10^-5	3.68x10^-3	2.109285574
C18orf24	5.637840257	0.177961250	1.027909096	0.147304583	0.000000000	0.419391675	6.751677167	7.465441162	5.778660750	7.654357894	4.882306167	6.691020364	5.302176107	3.886155864	5.916744197	5.87x10^-5	3.70x10^-3	2.099616130
C12orf32	5.673338917	4.670510679	4.859352250	5.064428616	5.287976500	5.705207917	7.745057250	7.209426062	6.328238167	7.048985250	6.451438500	6.718928829	1.706876530	6.063574078	5.913692841	5.89x10^-5	3.70x10^-3	2.094815940
MGAT4A	9.501775104	9.525191000	9.571057333	9.410937750	8.856795250	9.659231750	11.506605830	11.254529170	10.941945000	11.382336920	11.389320830	9.958255750	1.651334219	10.246498470	5.913524536	5.90x10^-5	3.70x10^-3	2.094551133
TARBP1	8.639874992	8.794302750	8.118467295	8.425398583	8.043887000	8.804264167	10.643605280	10.314760830	9.699801833	10.580773000	9.241774083	10.125866670	1.630064484	9.286064707	5.906701024	5.96x10^-5	3.73x10^-3	2.083811548
CCT6P1	10.341938960	10.385427310	9.823673333	10.316335080	9.785409333	10.215391500	11.592016670	11.648830000	11.205695750	11.632778710	11.599694280	10.835087930	1.274321301	10.781856570	5.900247224	6.02x10^-5	3.75x10^-3	2.073647353
MT1M	15.188371190	16.822011070	15.995991010	16.336328060	15.740825080	15.995991010	11.319667500	14.206379170	12.404712500	12.813388050	11.005470490	14.304366290	-3.337588901	14.344458450	-5.895385384	6.07x10^-5	3.77x10^-3	2.065986186
FBP1	15.193524170	16.125758410	14.910574170	15.009892500	15.277075000	15.212722250	10.914423330	10.432292130	13.568243330	12.221607540	13.413012500	12.765022500	-3.069157528	13.753678990	-5.892731316	6.10x10^-5	3.77x10^-3	2.061802456
GSTZ1	11.105835000	11.068332500	12.707413060	12.787183720	12.528612500	10.723454510	8.352465833	8.995318113	9.313594792	9.522406022	8.833635253	10.240416330	-2.610499158	10.514888970	-5.873857605	6.28x10^-5	3.88x10^-3	2.032020137
LPAL2	11.191021670	11.599694280	11.140301670	11.914750830	12.120108700	11.116710120	5.827492122	9.960723229	7.084088164	8.500300250	7.876151917	9.222248500	-3.435263849	9.796132622	-5.868959949	6.33x10^-5	3.90x10^-3	2.024282908
MATN3	-1.055156775	2.212541932	1.027909096	0.147304583	3.814624250	0.397515350	5.238404250	3.699683250	5.493392372	5.249853363	5.727371299	6.387262799	4.208538150	3.195058814	5.854135506	6.49x10^-5	3.98x10^-3	2.000841346
TFRC	9.294193333	10.108184750	9.278750583	9.282123352	9.671490976	9.336111643	11.281498330	11.809760220	12.162106670	10.858398330	10.306659920	11.364410510	1.801996556	10.396140720	5.829306681	6.75x10^-5	4.13x10^-3	1.961505454
COL11A1	0.103028333	2.996653000	1.027909096	-2.062070717	2.476785750	2.679721167	8.304316635	5.265661833	7.106558566	7.527281750	6.546273549	4.232481333	5.293424506	3.850383358	5.825188393	6.79x10^-5	4.13x10^-3	1.954971886
LYRM4	9.176356021	8.944919917	9.536347418	9.611237686	9.297453196	9.319645583	10.191710470	10.587113750	10.313579000	10.442760150	10.322267680	10.890182220	1.143608909	9.886131091	5.822214965	6.83x10^-5	4.13x10^-3	1.950253015
CD160	8.825203500	7.808834417	6.919953583	8.330536312	7.979916638	7.537451333	5.463555833	5.951375246	5.301603500	2.974279539	2.760755000	2.382045750	-3.761380152	6.019625888	-5.821819743	6.83x10^-5	4.13x10^-3	1.949625691
CAMK2B	5.041470555	7.374351167	6.136877387	6.662992167	6.261186898	5.490993500	3.354463633	3.284733443	4.082744229	1.996119117	0.665593333	0.132998375	-3.908536591	4.207043650	-5.820717544	6.84x10^-5	4.13x10^-3	1.947876080
TREML1	10.584694030	10.947659170	10.550220110	11.128166670	11.197264170	9.920179500	6.410439083	7.710566368	8.916725333	8.042944966	9.301311858	8.578959917	-2.561206020	9.440760931	-5.816038383	6.90x10^-5	4.15x10^-3	1.940446417
NME2P1	14.702256670	14.514578330	14.979745000	14.913444770	14.544720000	14.814430000	16.066396960	15.885992500	16.242232500	16.211703330	15.785611740	15.372297500	1.182509962	15.336117440	5.813170723	6.93x10^-5	4.16x10^-3	1.935891449
COL6A6	5.547520083	6.899066043	6.947129250	7.744757119	6.156677500	6.035252608	4.118345439	2.147420850	2.947602667	4.076963631	4.433956000	4.719047564	-2.814511075	5.147811563	-5.811032616	6.95x10^-5	4.16x10^-3	1.932494489
PLA2G12A	9.923042258	10.378647180	10.160180670	10.410442420	9.936711750	9.660042083	8.467282732	8.810389250	9.222248500	8.736274844	8.928303173	9.070258250	-1.205718268	9.475318592	-5.807573460	6.99x10^-5	4.17x10^-3	1.926997219
NOL7	12.130625830	12.064207500	12.456128200	12.187305980	12.179341670	12.179341670	13.062483390	13.715675800	13.266270240	13.300230000	12.999020830	13.826692500	1.162236986	12.780610300	5.802046984	7.05x10^-5	4.20x10^-3	1.918210817
ALDH1B1	9.937534490	10.788826210	10.751117880	10.910932280	11.214759970	11.363492540	7.027212335	7.943318305	8.179679976	8.117670024	9.273337324	9.698281449	-2.454527326	9.600513565	-5.796861722	7.11x10^-5	4.22x10^-3	1.909962701
GJC3	8.189051929	8.793651750	8.701853737	8.737194764	8.549305942	7.393241250	6.066796167	7.051049083	7.210355031	6.521639588	6.338332167	6.917487167	-1.709773362	7.539163215	-5.795380296	7.13x10^-5	4.22x10^-3	1.907605472
LOC341230	14.602905830	14.333501670	13.902479370	15.293273650	14.829526870	14.001112910	8.189987313	11.035076930	11.144200830	11.428215000	12.130625830	12.331406670	-3.450547954	12.768526070	-5.792687345	7.16x10^-5	4.22x10^-3	1.903319625
ABHD2	8.341726131	8.560366969	8.190216596	8.460125441	8.384656302	7.918564947	6.556318989	6.084175104	6.670284495	7.563196086	7.219542151	6.894732397	-1.477901194	7.570325467	-5.788595265	7.21x10^-5	4.24x10^-3	1.896804960
CFI	14.841034170	15.368191670	15.257157500	15.229901790	15.093629610	14.006546230	13.125547500	13.136708070	14.112301140	13.310156670	12.931057500	13.429135830	-1.625259043	14.153447310	-5.783996952	7.26x10^-5	4.26x10^-3	1.889481339
CYP2C8	14.104921710	13.513036640	14.344739030	13.877945000	13.665854750	12.418745000	8.095118500	6.426296417	10.113518330	9.383562700	6.891136750	12.142863330	-4.812124349	11.248144850	-5.778786001	7.32x10^-5	4.27x10^-3	1.881178118
CBARA1	9.711229667	9.962920327	10.122228560	9.679670505	10.255667500	9.867071170	8.441085500	8.543950750	8.700841417	8.672411917	8.558107992	9.376176250	-1.217702317	9.324280129	-5.778588566	7.33x10^-5	4.27x10^-3	1.880863441
N4BP2L1	10.869337500	11.318455830	11.272183330	11.889154170	11.318455830	10.853977500	8.888379250	10.068772890	9.455856417	8.758043333	8.287011177	10.175217500	-1.981380600	10.262903730	-5.776858687	7.35x10^-5	4.27x10^-3	1.878106062
LIN9	8.155913095	8.092731303	9.006009250	8.563463167	8.796428833	8.961162417	10.348231940	10.158346330	9.918722083	9.743731333	9.562465750	10.632310000	1.464683228	9.328292958	5.774662180	7.37x10^-5	4.27x10^-3	1.874604240
AKR7A3	13.571564430	13.070407250	13.586850780	13.434703420	13.274514640	13.389766110	9.207710597	9.418554590	9.643723427	12.041407460	11.467567610	11.577210840	-2.828605350	11.973665100	-5.768530190	7.45x10^-5	4.30x10^-3	1.864824337
MMACHC	8.972999485	8.807923679	8.829052250	8.500300250	8.786052250	7.759879333	6.718928829	7.175050144	7.364771333	7.183759000	6.644904917	7.610663563	-1.493021577	7.862857086	-5.766935665	7.47x10^-5	4.30x10^-3	1.862280300
ESM1	6.425739833	5.447432244	5.870669750	6.519540583	6.032953583	5.521197333	8.543570000	9.716217667	8.255201250	8.429053602	6.802211750	9.712933167	2.606942351	7.273060064	5.763419242	7.51x10^-5	4.30x10^-3	1.856668551
KIF14	0.103028333	0.177961250	3.597764720	0.147304583	0.000000000	0.000000000	6.449736417	5.226855000	4.687366667	5.212958250	2.662481167	4.343435750	4.092795727	2.717407678	5.762189475	7.52x10^-5	4.30x10^-3	1.854705563
GAP43	1.392280096	0.177961250	1.027909096	0.147304583	-0.524620525	2.919793417	6.503908709	5.353105863	4.339038250	3.786362000	3.203246583	4.071760500	3.686132331	2.699837485	5.761447529	7.53x10^-5	4.30x10^-3	1.853521138
CENPP	7.289203717	8.037161866	7.910564750	7.508129070	7.420763917	7.816683816	8.737640750	10.532595330	9.253484053	8.836944583	9.435249417	9.509885000	1.720548667	8.524025523	5.756810273	7.59x10^-5	4.30x10^-3	1.846116447
ALPL	6.396783995	6.283292989	6.849521041	6.902127093	6.154728233	6.233050954	4.916092030	4.839050478	5.413187686	5.505932171	5.410993508	5.254471449	-1.246629498	5.846602635	-5.756206093	7.60x10^-5	4.30x10^-3	1.845151464
CCDC34	6.602750333	5.512735938	6.937305583	6.555223250	5.776601178	7.013477990	9.824776000	8.717948583	8.239435208	8.883799106	7.435907796	9.167161417	2.311822306	7.555593532	5.755414592	7.61x10^-5	4.30x10^-3	1.843887211
H2AFX	10.888450830	11.289842150	10.224656750	10.088019170	10.436944920	10.916044170	12.745545560	13.195712560	11.839342500	12.977817290	12.545425830	11.630830590	1.848452723	11.564886030	5.752064525	7.65x10^-5	4.32x10^-3	1.838535153
MMP1	5.987656663	5.603262083	6.383652000	5.659146167	6.083858179	6.152157021	11.903836670	10.788826210	7.696213295	9.775957652	7.966634055	9.147423000	3.568193128	7.762385249	5.746696209	7.71x10^-5	4.34x10^-3	1.829955213
PHLDA1	10.619704920	10.551475330	10.665097500	11.301173290	10.057325080	9.754133140	8.796428833	8.590215917	8.657553722	9.087475083	9.195825667	9.330179500	-1.548538424	9.717215665	-5.735504643	7.86x10^-5	4.41x10^-3	1.812054239
CCNA2	4.806235667	5.332859667	5.243508500	5.398946583	6.169360939	6.016281000	7.872126000	9.083815001	7.134613521	7.742921872	6.784673500	7.337272667	2.164705034	6.576884576	5.733165439	7.89x10^-5	4.41x10^-3	1.808310280
AQP7P2	6.902447314	7.850249562	8.633611671	8.033390643	7.913517311	7.773596694	4.312231746	6.208293481	5.393197883	4.706537053	6.099440265	6.441912592	-2.324200029	6.689035518	-5.730787080	7.92x10^-5	4.42x10^-3	1.804502805
PSMD14	12.047671240	12.358281720	12.555376670	12.499246670	12.076620830	12.273948330	13.990608330	13.916280000	13.123922570	13.698329170	13.158189750	13.388117550	1.244050320	12.923882740	5.722794206	8.02x10^-5	4.46x10^-3	1.791700894
DEPDC1	6.117189381	6.466283340	4.370735833	4.081160750	5.897434184	5.842935187	8.484925886	8.760471690	7.527617650	7.623946083	7.512268978	7.818070583	2.491927033	6.708586629	5.719184325	8.07x10^-5	4.48x10^-3	1.785915913
LOC202451	5.114707083	1.865523087	1.027909096	0.147304583	0.427954851	4.123079381	9.552660912	6.296683250	6.135793352	8.684713833	8.607831667	6.037618373	5.434803884	4.835148289	5.711747145	8.17x10^-5	4.52x10^-3	1.773991333
ATAD2	7.183759000	8.531579875	7.464162951	7.926593750	7.387565307	8.084075303	8.903891500	10.457197500	9.478429456	10.888085550	9.419070000	9.678289457	2.041204546	8.783558304	5.710070367	8.19x10^-5	4.52x10^-3	1.771301681
MND1	6.045641667	6.739308500	5.196508964	5.069270833	5.823699251	8.478465746	9.173074583	10.183321080	9.665594005	9.063752233	8.581723510	8.764312132	3.013147098	7.732056042	5.696545588	8.37x10^-5	4.60x10^-3	1.749591619
ETS2	13.340391670	13.916280000	12.896644980	13.680863330	13.221229170	12.940178330	10.421763300	11.506605830	12.204891970	11.673787320	12.079180830	11.432491670	-1.779477759	12.442859030	-5.695708983	8.38x10^-5	4.60x10^-3	1.748247790
DARS2	8.120417333	8.351891917	7.789298667	8.311368583	7.855203333	8.293327833	9.404322896	9.862010194	9.148865084	9.159804083	8.907466859	9.504399194	1.210893441	8.725697998	5.691094730	8.45x10^-5	4.62x10^-3	1.740834075
MSRA	11.988391670	12.576553330	12.796038330	12.876845830	12.933707500	12.275168970	9.086751333	10.454251330	10.909098200	9.990951833	10.844621620	11.539753330	-2.103546329	11.522677770	-5.678921012	8.61x10^-5	4.70x10^-3	1.721259189
ID2	14.225525830	13.919351670	14.548032070	14.009343360	14.947839800	13.978459170	12.558897500	12.300884170	13.120808330	12.038639170	13.451314740	12.218337160	-1.656611804	13.443119410	-5.677642911	8.63x10^-5	4.70x10^-3	1.719202756
NUSAP1	5.940198644	6.145958888	6.368356917	5.587295468	4.718354417	6.008108999	9.269329000	8.788928144	8.427624000	9.086335417	6.539556857	7.937322088	2.546803696	7.068114070	5.670430381	8.74x10^-5	4.73x10^-3	1.707593366
TOMM6	11.338928330	10.838613330	11.802944590	11.231396940	11.155466720	11.175625830	12.832424170	13.112397500	12.595464340	12.272952730	12.135050830	13.392305180	1.466269834	11.990297540	5.669719249	8.75x10^-5	4.73x10^-3	1.706448294
AGL	11.733792280	11.440949100	12.310472160	12.245158380	12.220024880	11.290937060	10.168565300	9.723456753	10.948746300	9.313594792	9.736212784	10.636527650	-1.785705049	10.980703120	-5.663159180	8.84x10^-5	4.76x10^-3	1.695881617
NARF	10.329260280	10.179841820	10.022141440	9.972388250	10.023138210	9.717551171	10.956654140	10.926370830	10.877301320	11.413992500	11.267855860	11.078129300	1.045997131	10.563718760	5.663127123	8.84x10^-5	4.76x10^-3	1.695829965
PDXDC1	11.422901080	11.562085810	11.245580830	11.547729170	11.585103430	11.255813330	10.592311400	9.481941108	10.174761250	10.117706770	9.745013193	10.651055830	-1.309404015	10.781833600	-5.652949858	8.99x10^-5	4.82x10^-3	1.679424010
TP53I3	7.531544000	7.740450493	8.107443667	8.437709540	7.358939047	8.692342000	9.078657292	10.648666610	10.825136670	10.770365830	10.087030090	12.493688020	2.672519293	9.314331104	5.642016680	9.15x10^-5	4.90x10^-3	1.661782166
CYP26A1	12.512682500	9.909639560	13.134123270	11.863557360	12.630287500	11.950428330	7.157229922	4.345512250	8.210163333	5.411818232	6.979205917	10.286976150	-4.934968786	9.532635360	-5.623217970	9.44x10^-5	5.02x10^-3	1.631406490
MT1L	16.004572890	17.398955860	16.917712130	17.297777550	17.147314260	17.569848110	11.970828950	14.913444770	13.319731670	14.185225000	12.617393220	15.770615910	-3.259823547	15.426118360	-5.622450187	9.45x10^-5	5.02x10^-3	1.630164751
CYP2A7	15.208272760	14.185225000	14.333501670	15.096034940	15.009892500	14.348062500	7.511101167	5.498675103	11.997839170	10.186334750	10.263591170	11.357217500	-5.227705086	12.082979020	-5.621628202	9.46x10^-5	5.02x10^-3	1.628835252
SARDH	9.797802738	10.491920000	10.379218170	10.628785000	9.663788832	8.869899000	7.972902083	8.543350500	8.113688259	7.869306917	7.849599333	8.782963517	-1.783267188	9.080268696	-5.613746452	9.58x10^-5	5.07x10^-3	1.616081964
LOC344887	5.238848680	5.856571625	5.418686452	6.085465583	4.954580076	6.314794004	8.512084514	6.719471583	7.389113576	8.322819615	7.447542667	9.177125790	2.283201888	6.786425347	5.598910738	9.82x10^-5	5.19x10^-3	1.592051365
HN1	11.915746670	12.399553160	11.313933330	11.560878700	11.395837800	12.173990580	13.585170830	13.711578120	12.913931460	14.023910000	14.072091670	12.675948330	1.703781696	12.645214220	5.596579358	9.86x10^-5	5.19x10^-3	1.588272044
MIP	4.827638250	5.666003902	5.158378760	5.074926750	5.208589250	4.710556167	2.519549750	0.997577316	3.268309768	1.857424175	3.736994833	3.579168791	-2.447844741	3.883759809	-5.595663607	9.87x10^-5	5.19x10^-3	1.586787329
MSH2	9.072452833	8.751520167	8.652130750	8.994485847	8.602339917	9.585496463	11.222450010	11.369951010	9.956389417	10.544417420	9.920179500	10.680940000	1.672650230	9.779396111	5.583926856	1.01x10^-4	5.27x10^-3	1.567747313
HHIP	6.399209618	7.532092917	7.365052833	7.526728734	6.759505035	7.401176009	5.666469333	4.347367500	2.677060500	5.845633695	4.267418167	3.723073016	-2.742790489	5.792565613	-5.582076372	1.01x10^-4	5.28x10^-3	1.564743473
CCNYL1	7.160068167	6.672000241	7.336274333	6.426296417	6.957776000	6.720005726	8.299452083	8.791548583	8.185712958	8.134693093	7.562163655	8.568619667	1.378294859	7.567884244	5.576911187	1.02x10^-4	5.31x10^-3	1.556356261
C9	15.758678330	16.049060000	15.084843230	15.110045880	15.735406210	14.420754170	10.113518330	10.644572500	13.119002560	11.712630000	10.388082310	6.078610500	-5.017061935	12.851267000	-5.571430532	1.03x10^-4	5.34x10^-3	1.547452427
AGXT2L2	9.757839065	9.882667254	9.807354264	10.068403400	9.948534888	9.884209347	8.312243928	8.403101928	8.935975228	8.676433901	9.260691166	8.960153396	-1.133401446	9.324800647	-5.565315127	1.04x10^-4	5.38x10^-3	1.537512083
LOC100130171	3.170049000	4.197190917	1.027909096	2.024540492	2.496905881	3.581011250	5.441882500	5.522445739	4.507270167	5.901940758	6.650588750	5.490454233	2.836162585	4.167682398	5.562752112	1.04x10^-4	5.38x10^-3	1.533344345
TTTY23	6.110084041	6.594809760	7.118933583	7.161694833	6.592321333	5.068708523	2.318785903	3.707958083	4.781794965	4.154067833	4.367019167	4.310934745	-2.500998563	5.190592731	-5.560962447	1.05x10^-4	5.38x10^-3	1.530433575
PHGDH	11.109114170	10.815120830	11.955607730	11.420065800	11.721966810	10.541386830	6.554118621	8.455524500	8.381195167	8.545366667	10.430474920	7.563196086	-2.938897702	9.791094844	-5.560760002	1.05x10^-4	5.38x10^-3	1.530104281
TUBA1C	12.456916670	12.756607900	11.829915470	12.050274170	11.929071670	12.158845150	14.311375090	13.459305830	13.439404170	13.906720830	13.236152790	13.213896090	1.397537297	12.895707150	5.556213399	1.05x10^-4	5.39x10^-3	1.522707249
ITGB1BP1	9.653569500	9.026804142	10.625776830	9.630815333	9.638906167	9.886079975	11.092149170	12.021386670	11.592016670	11.389320830	10.865367500	11.050203330	1.591415369	10.539366340	5.555881408	1.05x10^-4	5.39x10^-3	1.522167000
SAE1	10.242560750	10.363745000	10.295689710	10.566136920	10.083398600	10.506981320	12.064207500	11.252405000	11.331087760	12.076620830	11.587705000	11.133033330	1.231091189	10.958630980	5.550800416	1.06x10^-4	5.43x10^-3	1.513896649
PRRX2	2.610064250	0.177961250	1.027909096	0.147304583	0.000000000	0.182866833	5.434234167	5.941089479	5.813431333	5.562358526	4.088942250	1.588868258	4.047136334	2.714585836	5.548934735	1.07x10^-4	5.43x10^-3	1.510858905
CYP4F8	11.079791670	11.724510000	11.877975390	12.077660830	12.245893330	11.221166670	8.161541886	8.509851922	9.541154596	9.820407632	9.806686036	10.718015830	-2.278223330	10.565387980	-5.547634680	1.07x10^-4	5.43x10^-3	1.508741820
ACTG2	9.385487830	7.476502754	6.157058423	7.678010784	7.391638246	6.542211028	9.110728032	13.685639520	10.326181710	11.524889090	11.854175280	11.887473010	3.959696263	9.418332976	5.544019611	1.08x10^-4	5.44x10^-3	1.502853503
HMGCS2	13.745727880	14.170062500	14.555046670	14.380580650	13.901026470	13.483612500	9.402379750	10.836945260	12.305288070	11.388542690	12.353961670	12.242295680	-2.617773924	12.730455820	-5.542921233	1.08x10^-4	5.44x10^-3	1.501064052
TUBA1B	14.958175470	14.747769170	13.845129170	13.731460830	14.045013330	14.779640000	16.652505830	16.346064520	15.816242390	16.017765830	15.590557500	15.501115000	1.636177186	15.169286590	5.541391917	1.08x10^-4	5.44x10^-3	1.498572227
MCM3	11.124321760	11.152437850	9.956389417	10.956654140	10.685174610	11.521327440	13.655233280	13.327518330	12.541791670	12.015859170	12.308587500	12.674578330	1.854543844	11.826656120	5.540162432	1.08x10^-4	5.44x10^-3	1.496568685
TDRKH	5.946169500	5.921266833	5.698552750	5.734154550	5.344523250	5.424012536	6.933789904	7.807123926	6.726871667	6.861341667	6.517292414	7.251479083	1.338203207	6.347214840	5.536515199	1.09x10^-4	5.46x10^-3	1.490623907
ACBD6	10.374919290	10.467411580	10.060070870	10.631325890	10.449793360	10.624073640	12.388331210	12.265957940	11.192775890	11.461894340	11.790847100	11.508823230	1.333505849	11.101352030	5.529530516	1.10x10^-4	5.51x10^-3	1.479233749
AKR1D1	10.690804170	10.651616850	12.772026060	11.810598230	11.316203560	10.959004550	5.671069294	6.314794004	10.571372770	7.210602007	7.737214437	7.502290096	-3.865485136	9.433966336	-5.519804392	1.12x10^-4	5.58x10^-3	1.463360924
KLKB1	12.524903420	12.210061960	12.876845830	12.222348160	12.966659170	11.420415830	8.026064000	9.549859882	11.068718330	8.753808917	10.840888810	9.516688500	-2.744200989	10.998105230	-5.515313497	1.13x10^-4	5.61x10^-3	1.456027129
C3orf37	10.860273640	10.767270830	11.731834170	11.639483950	10.910932280	10.321320710	9.281444750	9.456299083	9.779269417	9.894908583	9.012580333	9.675607853	-1.521834260	10.277602130	-5.509554213	1.14x10^-4	5.65x10^-3	1.446617617
GRPEL1	9.244587005	10.141844750	10.067990330	9.730276917	9.839235194	9.368452402	8.054229417	8.372386750	8.469572833	8.408749333	8.896738000	8.713805417	-1.246150808	9.108989029	-5.499175539	1.16x10^-4	5.73x10^-3	1.429648500
FLJ25770	4.825638833	5.482527750	5.801715333	5.721548333	5.529359667	4.427885958	1.318186358	2.858473000	3.540432917	4.138466750	3.187511202	2.317846306	-2.404626557	4.095799367	-5.494570872	1.17x10^-4	5.76x10^-3	1.422114750
QDPR	12.342009560	11.768849230	13.026656550	12.895150460	12.898088670	11.859706670	9.636103083	10.161439570	10.490713210	10.829613450	10.501361000	11.627165500	-1.924010888	11.503071410	-5.488216966	1.18x10^-4	5.80x10^-3	1.411713879
ARVCF	8.510788185	8.661871972	8.506933018	8.346399737	8.153829777	8.475703967	6.454462155	7.203296297	7.095234486	7.992395130	6.867916137	6.717118013	-1.387517406	7.748829073	-5.487103760	1.18x10^-4	5.80x10^-3	1.409891028
KIF15	6.340537993	6.345581668	6.662116083	6.541664167	6.102514832	7.093330667	9.044119083	9.826400167	8.436873333	8.932208917	7.005466750	8.766838750	2.154360265	7.591471034	5.484910263	1.19x10^-4	5.81x10^-3	1.406298683
C9orf103	12.575615000	12.777801340	13.018853330	12.859542500	12.561840740	12.620114150	9.611237686	11.686009170	10.717182850	10.209303510	10.245597630	11.899069710	-2.007561082	11.731847300	-5.483024807	1.19x10^-4	5.81x10^-3	1.403210255
VIL1	8.722486574	8.757295261	9.503873417	9.456747500	8.745710896	9.016792833	11.006279170	11.128166670	11.019342970	11.917663330	10.966285000	9.527197467	1.893671354	9.980653424	5.479159135	1.20x10^-4	5.82x10^-3	1.396876528
ISX	1.802144058	3.448486621	1.027909096	3.602331133	2.063117008	5.026150583	3.884382917	9.689518233	10.339936550	9.343272060	12.256294170	9.659231750	6.367082863	6.011897848	5.477746132	1.20x10^-4	5.82x10^-3	1.394560835
C7orf58	8.660895445	7.612737333	9.306388267	8.849996500	8.389763333	8.167056750	6.907346333	5.791454769	7.710341750	6.027409333	6.339302796	5.861685206	-2.058216240	7.468698151	-5.476005890	1.20x10^-4	5.82x10^-3	1.391708439
MTBP	3.519465000	2.145018490	3.548047833	1.479077603	3.496410250	1.698298705	5.394625421	5.332419833	5.066295753	5.521197333	3.994314917	4.938828917	2.393560715	3.844500005	5.473919776	1.21x10^-4	5.82x10^-3	1.388288542
ZSCAN16	7.994679988	7.944501642	7.791175917	7.184069967	7.462894833	7.881063000	8.597042333	9.172704750	9.158907696	9.057653118	8.448476833	9.132200833	1.218100036	8.318780909	5.471743967	1.21x10^-4	5.82x10^-3	1.384720914
LOC254559	9.032766500	9.297086464	11.390447540	11.527652500	11.873603700	10.552550670	5.822493500	7.179904063	8.336613366	8.293768333	6.729975000	7.964216167	-3.224522824	9.000089817	-5.471082495	1.21x10^-4	5.82x10^-3	1.383636174
MPDU1	10.753019170	11.121185000	11.289276670	11.011474630	11.122902500	10.718725840	10.006258520	10.007703420	9.819842750	9.960437577	10.331581580	9.903601829	-0.997859689	10.503834120	-5.470948558	1.21x10^-4	5.82x10^-3	1.383416524
FAHD2A	11.519720910	12.007739170	12.271878400	12.114006670	12.165640830	11.888428970	9.415707000	9.576840083	10.145705500	9.871346167	11.354360000	10.835816700	-1.794606582	11.097265870	-5.470395082	1.21x10^-4	5.82x10^-3	1.382508824
TRPC6	2.701072417	2.760755000	1.027909096	0.147304583	0.491938681	0.416136550	4.808685428	4.974637417	4.380223750	3.016681750	3.731470915	3.906375833	2.878826461	2.696932618	5.465424354	1.22x10^-4	5.86x10^-3	1.374354801
MYOM2	9.131165833	8.676842417	10.088784670	9.660445834	9.817729000	8.518994000	6.552959833	5.601265750	7.486478417	6.999653500	5.543366490	3.143856758	-3.427730167	7.601795208	-5.458871497	1.24x10^-4	5.91x10^-3	1.363599851
ALS2CR4	8.185252243	7.657363615	7.827720350	7.728556503	7.448398426	7.951322293	10.202857200	10.069314610	9.352660612	8.893063188	8.660895445	9.089085179	1.578210467	8.588874139	5.450092641	1.26x10^-4	5.97x10^-3	1.349181496
NUDT6	10.109862330	10.242560750	11.539077470	10.993606670	10.895411670	10.294046350	7.974279833	8.554758167	8.893343583	8.335726500	7.179694954	9.797325049	-2.223239526	9.567474444	-5.449958144	1.26x10^-4	5.97x10^-3	1.348960511
MIA2	9.784546102	10.483777580	9.727678209	9.259350417	10.430474920	9.375179066	7.747352588	7.894398630	8.716393333	8.116746417	8.660587139	8.594762580	-1.555127601	9.065937248	-5.446807363	1.26x10^-4	5.98x10^-3	1.343782839
C11orf82	4.831469479	5.044672750	3.433245617	3.575738881	5.108866083	5.344523250	7.434929497	8.213501082	6.283920333	6.438740534	6.227166417	7.305178917	2.427486787	5.770162737	5.445163007	1.27x10^-4	5.98x10^-3	1.341080089
FAM49B	10.702286670	10.071116580	11.176439520	10.293769170	10.251127000	10.268332510	12.334497270	12.708539530	12.262846800	12.373294170	11.039871820	11.843346670	1.633220800	11.277122310	5.441930261	1.27x10^-4	6.00x10^-3	1.335765413
NR2C2AP	9.697687500	9.723972419	9.297453196	9.715164257	9.488118868	9.862305638	10.814354750	10.862111670	10.336254700	10.695196420	11.062510000	10.401455780	1.064530241	10.163048770	5.437767755	1.28x10^-4	6.03x10^-3	1.328919927
PHEX	6.585242575	6.402938917	7.756310076	7.731307333	7.093005500	6.615803164	4.537158583	5.740347750	5.704495453	5.127357750	3.625836843	4.284943417	-2.194077962	5.933728947	-5.432191572	1.29x10^-4	6.07x10^-3	1.319745555
DBF4	6.518735096	6.850007583	5.965736833	6.286513598	6.236674560	6.730343376	8.035401917	8.618643250	7.619237333	7.878254390	7.217765335	7.638903702	1.403365813	7.133018081	5.430119089	1.30x10^-4	6.07x10^-3	1.316334575
RPS18	17.352013690	16.602190830	16.950034470	16.822011070	16.707490940	17.113763050	17.877508640	18.168022370	17.736795440	17.920167480	17.900984480	18.168022370	1.037332787	17.443250400	5.429186372	1.30x10^-4	6.07x10^-3	1.314799262
MFSD2	7.971174583	10.302474740	9.644776500	9.634905500	9.045732932	9.839604583	6.608026028	6.896656500	7.526728734	7.439883597	7.903486250	7.742921872	-2.053494310	8.379697652	-5.428282542	1.30x10^-4	6.07x10^-3	1.313311378
NAT2	11.536315000	11.533607340	12.694618330	12.036956670	11.751176670	10.092061330	7.173601833	9.720402417	7.415240750	8.037661833	7.138901072	10.304232080	-3.309115893	9.952897944	-5.420342301	1.32x10^-4	6.13x10^-3	1.300234973
NVL	10.117220380	9.915651582	9.820821566	9.854156250	9.895250667	9.847520833	11.490691670	11.363492540	10.728389350	11.480601620	10.519632840	10.926370830	1.176426263	10.496650010	5.419682110	1.32x10^-4	6.13x10^-3	1.299147319
CFP	13.286326670	13.437023640	12.868361670	12.687599310	13.086443840	12.711944700	12.206611670	10.243259750	10.658523250	9.568576887	9.542409991	7.893275833	-2.994173740	11.515863100	-5.415645176	1.33x10^-4	6.14x10^-3	1.292495127
MEA1	11.428887880	11.134965000	11.377816670	11.274579810	11.073178330	11.275793620	12.009327500	12.202992500	12.180434170	12.032715960	12.365273190	12.667270830	0.982132140	11.751936290	5.415472457	1.33x10^-4	6.14x10^-3	1.292210462
FLJ39632	5.837933253	5.414221167	5.502748500	5.627809583	6.094367746	5.763871954	8.344179583	9.728902648	8.254526874	6.996432333	7.088507166	10.074464420	2.707676803	7.060663769	5.411433713	1.34x10^-4	6.16x10^-3	1.285552784
FAM105B	11.768432500	11.279394520	12.653046670	12.677295000	12.618652630	9.877569917	7.927397250	8.735394666	10.303976330	9.633938583	8.225437150	8.147713583	-2.983422276	10.320687400	-5.411029140	1.34x10^-4	6.16x10^-3	1.284885731
BCO2	9.629547813	11.148639170	11.524452360	10.437645080	10.680940000	10.291753330	6.534374000	3.723073016	8.538427150	6.207822500	8.003869833	7.890282404	-3.802521475	8.717568888	-5.409662389	1.34x10^-4	6.16x10^-3	1.282632081
SAMD5	10.334992590	8.722245685	9.113727167	9.710468432	9.626519667	7.610663563	7.298820987	5.193057833	7.362519624	6.835475583	6.681675008	6.300596333	-2.574411956	7.899230206	-5.408197845	1.35x10^-4	6.16x10^-3	1.280216875
FANCI	6.461664833	7.586637375	5.471111800	5.708239373	6.212230833	6.933094176	8.984254917	9.498843583	7.608164750	8.914474750	8.636044159	8.003471000	2.212045795	7.501519296	5.403665804	1.36x10^-4	6.18x10^-3	1.272740999
CDH13	8.063677667	6.201633957	6.718928829	6.215257051	6.430289167	7.153504755	8.059516247	10.178325080	9.909639560	8.807923679	8.366805158	9.729721667	2.378106661	7.986268568	5.403628967	1.36x10^-4	6.18x10^-3	1.272680222
ACY3	7.191678954	7.694423581	8.593342289	8.059516247	7.576887347	7.237511955	5.426012207	6.014510586	6.377056109	6.701454953	5.818875335	6.394567553	-1.603480605	6.923819760	-5.401582738	1.36x10^-4	6.18x10^-3	1.269303842
PSD4	8.363337245	8.623094917	8.005494294	8.391171917	8.094147500	7.786372250	7.000206683	7.188278333	6.851188917	7.216150205	6.727173333	5.871672259	-1.401491399	7.509857321	-5.396306459	1.37x10^-4	6.22x10^-3	1.260594876
SLC19A3	7.383231917	7.836917500	7.978665639	7.696213295	7.658174022	7.852217482	5.311580583	6.549669083	5.098159417	5.238049513	6.107285181	7.088507166	-1.835361485	6.816555900	-5.391681610	1.38x10^-4	6.26x10^-3	1.252957787
RECQL4	6.812572583	7.569818298	5.929966030	6.033468184	6.228765120	7.069168981	9.000800583	9.232208833	8.046648602	9.183583500	9.943840917	7.659064250	2.237064581	7.725825490	5.386134871	1.40x10^-4	6.29x10^-3	1.243794222
TRIM24	12.670152910	11.673787320	11.670245830	11.806745830	12.288113330	12.195447500	13.272498540	13.854736670	13.058595000	13.179262500	14.179014810	13.295041310	1.422442682	12.761970130	5.386091502	1.40x10^-4	6.29x10^-3	1.243722555
E2F2	7.174801394	7.035216749	7.171784583	7.204386632	7.132590000	7.687814500	9.064045204	9.082070333	8.109472592	8.472219750	8.090545510	8.279184553	1.281824014	7.875344317	5.384133258	1.40x10^-4	6.30x10^-3	1.240486320
HIST1H1B	3.247720426	0.177961250	1.027909096	3.026497000	0.224828458	0.149404583	7.230183405	7.950203750	4.044244917	5.656161417	4.516868333	4.462441833	4.334297140	3.476202039	5.375818167	1.42x10^-4	6.37x10^-3	1.226738353
RDM1	4.688568300	5.650144756	5.993615167	3.682123280	5.121611198	6.047152222	7.851309833	8.459356500	7.400101291	8.641452167	6.249529278	8.697247957	2.685963684	6.540184329	5.365876725	1.45x10^-4	6.46x10^-3	1.210288108
CACNG2	7.810751091	8.023225359	9.807828355	9.869732667	9.505109333	7.954882417	4.296348750	5.327139861	7.066454833	6.718515139	6.458997500	5.635608433	-2.911410784	7.372882812	-5.362591643	1.45x10^-4	6.48x10^-3	1.204849053
ENPEP	9.102746000	9.408537401	9.614479791	9.782987301	9.143810000	9.767987083	6.336819544	7.234505783	8.274141000	7.144880333	8.316997833	8.249768023	-1.877239177	8.531471674	-5.357561276	1.47x10^-4	6.52x10^-3	1.196517295
TIPIN	8.780625417	8.579882389	9.253935583	8.950585749	8.727754977	8.830963187	10.197627580	10.402589920	9.633938583	10.033635250	9.671490976	9.786790750	1.100387626	9.404151697	5.356725104	1.47x10^-4	6.52x10^-3	1.195131990
PCNA	10.903501670	10.525155040	11.126524770	11.080610000	11.038378330	11.413992500	12.792962500	12.235719520	12.390299170	12.732931670	11.494843330	12.819875830	1.396411618	11.712899530	5.354518952	1.47x10^-4	6.53x10^-3	1.191476519
CKAP5	7.644702953	7.687176396	7.146152417	7.100157333	6.757435500	7.240773583	8.776334640	8.630985750	8.049122889	8.974447176	8.201878250	8.484350917	1.256786907	7.891126484	5.352703683	1.48x10^-4	6.53x10^-3	1.188468184
GLYAT	13.470458000	13.382825830	14.203026670	14.114348330	13.916280000	13.414450860	7.451102861	4.617670000	10.148451790	8.389763333	8.262585583	12.408260000	-5.203926023	11.148268610	-5.341934178	1.51x10^-4	6.64x10^-3	1.170610635
CD109	7.258732667	5.417445916	6.333710541	6.098680667	5.750818667	6.768110167	8.821386167	7.986387917	8.614237583	8.203073417	8.301879083	7.150758750	1.908370716	7.225435128	5.338904724	1.51x10^-4	6.65x10^-3	1.165584265
ADH1C	15.568652560	15.633437380	16.659890430	16.352684520	16.517125060	15.665416460	12.346126140	11.652233430	12.742718220	13.472104260	13.594176240	15.466083040	-2.853960848	14.639220640	-5.336363649	1.52x10^-4	6.67x10^-3	1.161367163
COL4A1	9.512341083	8.869426333	8.337454498	8.133371698	7.949627000	9.040299167	10.917590440	10.633223870	10.260324560	11.124855000	10.067574040	9.596668083	1.792952702	9.536896314	5.331301954	1.53x10^-4	6.71x10^-3	1.152964098
FANCE	8.737920750	8.340742833	7.823305333	8.185252243	8.054498667	8.937463460	10.900389170	10.882270000	10.048392430	9.823673333	9.036490333	10.044079750	1.776018621	9.234539858	5.321600706	1.56x10^-4	6.81x10^-3	1.136848332
DLG5	8.079050180	7.023808083	6.451438500	6.997166368	6.315153833	7.455941386	9.318562154	8.453110276	8.301584000	9.036141251	8.412983167	8.958441635	1.693044022	7.900281736	5.314975518	1.58x10^-4	6.85x10^-3	1.125834654
HAAO	10.314103080	9.933972667	11.197762500	10.784478330	10.679057500	9.724530368	7.334373667	7.920523583	8.486043750	8.283316667	8.780625417	9.657196167	-2.028637534	9.424665308	-5.313809107	1.58x10^-4	6.85x10^-3	1.123894956
LOC100129478	1.609209225	0.177961250	1.027909096	0.147304583	1.816351075	2.742232833	5.068708523	6.038023540	4.573860333	4.415074929	3.193413809	2.871798208	3.106651880	2.806820617	5.313583284	1.58x10^-4	6.85x10^-3	1.123519398
HSP90AB1	10.581997580	10.613477670	10.689110180	10.638715000	10.143047750	10.435312250	11.235537500	11.607466670	11.667049170	12.040011670	11.234541670	11.767215000	1.075026874	11.054456840	5.312023973	1.58x10^-4	6.86x10^-3	1.120925961
COL17A1	0.103028333	2.750052167	1.027909096	0.147304583	0.000000000	0.128004417	3.643895750	2.957420833	3.802404500	5.414789167	3.681489976	2.430095167	2.962299466	2.173866166	5.306553023	1.60x10^-4	6.89x10^-3	1.111823913
LOC645277	10.614166140	10.367995500	10.748843990	11.595590880	11.494843330	9.539316333	6.274391583	6.655581833	8.972999485	7.935139333	9.407345833	7.617402097	-2.916316001	9.268634695	-5.304066939	1.60x10^-4	6.89x10^-3	1.107686365
NUP155	7.602162500	7.304680504	7.949627000	8.067337583	7.340135000	7.829695167	8.889563750	9.632871239	8.430711398	9.146410917	8.691196633	8.991866758	1.281497157	8.323021537	5.303543317	1.61x10^-4	6.89x10^-3	1.106814795
C1orf112	7.792457417	7.836001442	7.883094333	7.934037828	7.919960833	7.722947167	10.217707390	11.233565330	9.419070000	10.159042710	8.309453750	10.853977500	2.184052943	8.940109642	5.302652414	1.61x10^-4	6.89x10^-3	1.105331793
ANXA2P3	7.774416918	6.822842613	6.368749198	5.979747268	5.364018200	6.716434016	9.234298544	7.685734894	8.854752932	9.801709757	8.647336937	8.361406446	2.259838550	7.634287310	5.302196684	1.61x10^-4	6.89x10^-3	1.104573138
ADRA2B	7.441690733	6.344362773	5.945193441	6.730343376	6.373839685	6.119045684	3.380473484	4.610216586	5.516667163	3.930243771	4.201694249	5.199746511	-2.019238988	5.482793121	-5.296171744	1.63x10^-4	6.95x10^-3	1.094540564
MCC	7.588795501	7.043586527	7.830072750	7.442764121	7.575747387	7.056728173	5.773110917	3.466576192	6.562273833	5.232827583	5.106436333	4.042141833	-2.392387961	6.226755096	-5.289211313	1.65x10^-4	7.00x10^-3	1.082943672
HSD17B13	12.206611670	10.803140200	13.259037500	12.704502160	12.003610290	10.551475330	5.650634250	4.682086183	9.877123333	7.528803917	9.613571578	6.195693327	-4.663410760	9.589690812	-5.288960134	1.65x10^-4	7.00x10^-3	1.082525048
SNRPC	11.405261670	11.420415830	11.815424920	11.497150000	11.481042040	11.376312500	12.209051670	12.936090830	12.430101670	12.532067260	12.335372500	13.116138330	1.093869216	12.046202440	5.287747032	1.65x10^-4	7.00x10^-3	1.080503115
ANXA2P1	10.897533920	9.855815699	10.000554440	9.320342408	8.765923622	10.236397580	12.972108370	11.058189830	12.106387010	12.776705650	11.721966810	11.474823800	2.172268964	10.932229090	5.283507863	1.66x10^-4	7.04x10^-3	1.073435819
RND3	12.553002900	13.389766110	13.162710830	13.195712560	12.725783330	12.762655000	11.431855000	10.305580170	11.568671950	11.145420830	12.372216010	10.840144170	-1.687623766	12.121126570	-5.281210690	1.67x10^-4	7.04x10^-3	1.069605017
CELSR3	5.327908417	4.681699783	4.275031724	5.047934250	4.079096750	5.057611750	8.070787333	6.381961761	6.850401833	5.573027250	6.877215102	6.648804240	1.988819141	5.739290016	5.280854280	1.67x10^-4	7.04x10^-3	1.069010594
LOC729141	4.588591430	4.540855167	4.742060417	5.023717167	5.264535167	4.441613250	-0.785469033	2.584897946	0.249255292	-2.062070717	1.695282083	3.052455333	-3.977836949	2.777976958	-5.276054390	1.68x10^-4	7.07x10^-3	1.061003507
WDHD1	6.458056167	6.738756858	6.286894639	6.785846994	6.565695083	7.234218500	8.643383667	9.299054500	7.902300496	8.346035025	7.330193167	8.336613366	1.631351997	7.493920705	5.275662549	1.68x10^-4	7.07x10^-3	1.060349697
CDCA2	4.612375188	5.601913546	1.027909096	1.146350000	4.758065562	5.232827583	9.386885500	10.248875610	7.468422090	7.937734159	7.075671417	8.296364485	4.672418715	6.066116187	5.266394533	1.71x10^-4	7.17x10^-3	1.044879000
TBCE	11.623584170	11.785276970	11.768432500	11.832065000	11.566161670	11.639483950	12.898088670	13.379516670	12.593077990	14.072091670	12.436764770	13.655233280	1.469961464	12.437481440	5.261652774	1.72x10^-4	7.20x10^-3	1.036958985
LDLR	11.971912810	12.687599310	12.185360830	13.062483390	12.395450790	12.042163880	9.937839333	10.433276830	11.189187500	10.608590450	11.746936670	10.337632330	-1.681917982	11.549869510	-5.260571541	1.73x10^-4	7.20x10^-3	1.035152578
DDX39	11.662218330	11.730918730	10.621705720	10.800696660	11.143021670	11.601147500	13.437023640	12.973690970	12.163071670	13.135086070	12.611085000	12.368034170	1.521380483	12.020641680	5.259561912	1.73x10^-4	7.20x10^-3	1.033465649
SLITRK6	8.594762580	6.331972333	6.859746689	7.975130787	8.500014000	5.395916500	5.216923497	0.141257917	3.019339417	3.044210946	3.878570083	0.132998375	-4.704040443	4.924236927	-5.258302642	1.73x10^-4	7.20x10^-3	1.031361402
TKT	12.070615830	12.059000000	11.759552500	11.877975390	11.729567710	12.346126140	14.491667090	13.278456480	12.587302500	13.574015680	13.238201260	13.735846670	1.510442018	12.729027270	5.257270533	1.74x10^-4	7.20x10^-3	1.029636572
STAB2	9.495653222	8.690916583	10.351495180	8.603761232	9.546179917	9.338558001	6.937305583	6.646199583	7.203296297	7.763267951	8.116108471	8.086318911	-1.879011223	8.398255078	-5.255877612	1.74x10^-4	7.20x10^-3	1.027308517
AIM1L	5.063870608	5.060732288	4.836472979	5.057124468	4.696735627	6.669911628	6.739689749	8.119439387	6.391180832	7.605440800	7.389761344	8.601247101	2.243651936	6.352633901	5.255003531	1.74x10^-4	7.20x10^-3	1.025847483
TMEFF1	1.543840491	0.177961250	1.027909096	3.049000000	0.286122450	2.808616167	5.611245917	5.039457917	3.902096500	3.647173333	4.078176386	3.949935424	2.889106004	2.926794578	5.253744594	1.75x10^-4	7.20x10^-3	1.023742964
AQP7	9.403322875	9.228629641	11.433935930	10.832436050	11.060942700	9.444086214	5.151354121	7.911741127	5.466216339	8.155913095	7.109129419	8.005494294	-3.267250837	8.600266818	-5.247577008	1.76x10^-4	7.25x10^-3	1.013429528
NUP205	10.111372000	10.060988420	9.866709643	9.788803583	10.043254400	10.057325080	11.376312500	11.453250000	10.802642500	11.089613660	11.673787320	10.526609000	1.165626974	10.570889010	5.246670819	1.77x10^-4	7.25x10^-3	1.011913737
CKLF	10.210720500	9.533033083	10.703520810	9.729721667	9.922738791	10.103026360	11.248167860	11.299608330	11.413120150	11.406703330	10.927324170	10.986974170	1.179856135	10.623721600	5.246205019	1.77x10^-4	7.25x10^-3	1.011134542
LHX2	9.076501243	9.490667000	8.590215917	8.791548583	8.021383754	8.406865583	6.628535050	5.552642858	7.559706697	7.269542667	6.524848000	7.396368471	-1.907589723	7.775735485	-5.243706792	1.78x10^-4	7.26x10^-3	1.006954953
C7orf49	8.354800400	7.378253167	7.857585250	7.586637375	7.722495167	7.789995722	9.768860167	8.630395250	9.333404250	9.006732759	10.085375500	8.774336000	1.484889475	8.524072584	5.238980056	1.79x10^-4	7.31x10^-3	0.999044556
CBX3	13.270845830	13.122629170	13.791082500	13.550554170	12.986029000	13.286326670	14.932996510	14.950132500	14.551130000	14.535390520	13.877945000	14.468377980	1.218084194	13.943619990	5.235340598	1.80x10^-4	7.33x10^-3	0.992951575
LYVE1	8.613602083	8.617482344	10.645321060	8.630985750	7.898853833	8.538022605	5.309242417	7.492483044	6.895112130	6.557802241	5.371115711	5.937660167	-2.563475327	7.542306948	-5.235119144	1.80x10^-4	7.33x10^-3	0.992580766
FBXO39	7.004619833	6.833203000	9.055456414	8.945763583	8.835416000	7.347237321	0.655574317	4.040618750	5.988662750	5.197202167	3.205916219	4.160975524	-4.128791071	5.939220490	-5.231588807	1.81x10^-4	7.35x10^-3	0.986668534
PZP	11.239788330	11.181923330	9.846927932	10.127185250	11.225166210	10.589089050	7.228966500	6.995904750	7.694619667	7.725643679	10.418212420	6.868609167	-2.879687321	9.261836357	-5.230076811	1.82x10^-4	7.35x10^-3	0.984135855
MYO19	8.921498250	9.576840083	8.860889596	9.180363846	9.301891417	9.611237686	10.256431580	10.814354750	10.033635250	10.410442420	10.391794120	10.209303510	1.110540124	9.797390209	5.228290695	1.82x10^-4	7.35x10^-3	0.981143588
SLC47A1	11.158483330	11.427682380	12.404712500	12.136832500	12.454175220	10.908117500	8.765460000	9.760463000	9.778420083	9.048020917	10.262889150	10.689884170	-2.030811020	10.732928400	-5.227627568	1.83x10^-4	7.35x10^-3	0.980032538
CNN1	9.764712958	8.660895445	8.434932083	9.206582667	8.536610299	8.956309500	9.666966133	10.921939170	12.002705210	11.435130430	11.227519680	10.331581580	2.004299875	9.928823762	5.226863029	1.83x10^-4	7.35x10^-3	0.978751499
MMP12	2.105812114	4.113606000	5.751270917	5.543366490	4.326987583	4.602703667	9.638906167	9.055134000	10.334509810	11.152437850	6.393500995	6.794639715	4.487563628	6.651072942	5.225644497	1.83x10^-4	7.35x10^-3	0.976709586
CENPM	2.212541932	4.609129583	-0.395184910	2.739739001	3.980937178	4.610216586	7.673729000	7.073425250	6.812175667	7.111351083	5.979092750	6.450964750	3.890559855	4.904843156	5.222363042	1.84x10^-4	7.38x10^-3	0.971209742
ADH4	16.024685500	15.979025980	17.147314260	16.917712130	17.033241410	16.369572810	10.290152070	14.239991050	12.421824020	14.257119270	11.863071950	14.872041500	-3.587892040	14.784646000	-5.221056465	1.85x10^-4	7.38x10^-3	0.969019440
NUP37	9.771414917	9.147423000	10.555447970	10.010051670	9.738541667	9.663352383	11.552643680	12.163920000	11.149695000	11.258952500	10.577483670	11.386601900	1.533844190	10.581294030	5.215180366	1.86x10^-4	7.43x10^-3	0.959165907
LOC388503	15.460020000	15.590557500	16.060227690	15.590557500	15.885992500	14.836946130	9.890788000	9.620868197	13.611982500	10.984670830	12.603218320	14.047012500	-3.777626828	13.681903470	-5.214820075	1.87x10^-4	7.43x10^-3	0.958561580
ANO1	9.325006181	11.232962270	11.032361560	11.089613660	11.378858860	10.918236400	8.346399737	7.455356615	9.305249527	8.516848480	9.366983773	9.117590973	-2.144768304	9.757122336	-5.210903589	1.88x10^-4	7.46x10^-3	0.951991135
C1orf168	8.956602333	9.485633005	8.733879250	8.313719843	9.084844583	8.297492083	7.326509236	7.406724917	7.559988051	7.788853583	7.888876333	7.361309083	-1.256651649	8.183702692	-5.209252517	1.88x10^-4	7.46x10^-3	0.949220575
MOSC2	12.556858490	12.636463330	12.157580830	12.170651570	12.573798330	12.097187500	10.160706260	10.222295370	10.902232820	10.978892400	11.021094260	11.884440830	-1.503813021	11.613516830	-5.209150809	1.88x10^-4	7.46x10^-3	0.949049893
SHISA2	9.535115557	9.302124083	11.379541670	11.430262500	8.818442500	10.686616260	6.134353500	6.734070333	8.471373417	8.150153309	6.091964909	7.629734167	-2.990075489	8.696979350	-5.206145941	1.89x10^-4	7.48x10^-3	0.944006567
BUB3	10.370718000	10.173416560	10.509402880	10.212213250	10.226659250	10.097319750	10.985374170	11.564635830	10.906429290	11.750508620	11.435723380	11.201067140	1.042334790	10.786122340	5.201585739	1.91x10^-4	7.51x10^-3	0.936350319
WDR67	8.765460000	8.988520833	7.957022632	8.252173984	8.102687705	8.607831667	9.611740612	9.903057052	9.802583993	9.708913583	10.551179670	9.256970250	1.360124723	9.125678498	5.200836252	1.91x10^-4	7.51x10^-3	0.935091700
ARPC1A	11.864579090	11.550359590	11.701478970	11.703111320	11.748342950	11.858983600	12.594707450	12.613754570	12.684578540	12.864753450	12.670152910	12.297343840	0.883072543	12.179345520	5.200380212	1.91x10^-4	7.51x10^-3	0.934325830
CYP2B6	13.070407250	14.670521670	13.995430000	15.343827500	13.702353330	13.822753330	8.316590500	8.137399250	11.770286560	10.422738580	10.789822500	12.503285000	-3.777528450	12.212117960	-5.197482710	1.92x10^-4	7.52x10^-3	0.929459088
LAMC1	10.328658580	9.200449417	8.627078000	8.948611167	8.915017833	9.513282750	12.342009560	10.842879000	11.313933330	10.503333140	10.763339830	10.926955000	1.859892020	10.185462300	5.197419905	1.92x10^-4	7.52x10^-3	0.929353584
HADH	12.398723330	12.879856000	13.797040000	13.882809360	13.399404170	12.932889820	10.294835820	11.535506830	11.666043530	10.975121670	11.263024260	12.333563550	-1.870437837	12.279901530	-5.193925906	1.93x10^-4	7.55x10^-3	0.923483317
CCDC112	8.031235694	6.718928829	6.312865500	6.246440250	5.838305626	6.935753052	9.232208833	9.165886167	9.062379083	8.735988010	8.403770465	7.596902250	2.018934310	7.690055313	5.187186684	1.96x10^-4	7.62x10^-3	0.912155819
C13orf37	8.022339095	7.346737583	8.232585250	7.798973250	7.285646250	7.760436167	9.560793500	9.516149750	8.736849833	8.985341083	8.744296003	8.671477797	1.294698395	8.388468797	5.184373613	1.96x10^-4	7.64x10^-3	0.907425601
TSGA14	6.331972333	6.394567553	6.462730457	6.387495546	5.446557468	5.549290219	7.654669250	7.119931417	7.240220542	7.177826833	7.260646583	7.638468396	1.253191574	6.722031383	5.174356400	2.00x10^-4	7.75x10^-3	0.890572347
SOCS2	10.610795240	11.800235000	11.440039170	12.708539530	12.641023330	10.772900830	10.508627080	8.066210390	9.238588667	8.388994833	9.353802781	9.545834748	-2.478579101	10.422965970	-5.169161957	2.02x10^-4	7.79x10^-3	0.881827429
CCT2	13.277850830	13.460504170	13.702353330	13.510308330	13.099672500	13.241766690	15.222288330	15.411672500	14.405463330	14.594578780	14.151746670	14.328504290	1.303633009	14.033892480	5.169090281	2.02x10^-4	7.79x10^-3	0.881706736
C14orf73	6.647901017	6.367497333	7.022312886	6.921542333	6.493324083	6.450964750	4.829000750	5.637306318	5.601265750	5.245895250	3.775885083	5.245895250	-1.594715667	5.853232567	-5.158882209	2.05x10^-4	7.92x10^-3	0.864510007
CD302	12.166581630	12.207859170	12.222348160	12.375368160	12.050274170	11.600547890	9.160129930	10.653645830	10.942605980	10.018536100	10.699518010	11.170706670	-1.662972778	11.272343470	-5.155446218	2.06x10^-4	7.94x10^-3	0.858718333
DNASE1L3	14.209080000	13.585170830	14.670521670	12.548316430	13.084307500	14.239991050	8.617482344	9.173405083	11.915746670	11.069769170	10.782545000	11.982936670	-3.132583759	12.156606030	-5.154384209	2.07x10^-4	7.94x10^-3	0.856927881
CBS	14.464321670	14.667050000	14.779640000	14.784152500	14.818650000	14.139743810	10.635086090	11.656841670	12.408260000	12.922450830	11.835007580	14.016340000	-2.363261970	13.427295350	-5.153417246	2.07x10^-4	7.94x10^-3	0.855297528
SULT1A2	14.683255000	14.420754170	14.384721770	15.225789170	15.257157500	14.674849550	11.841535940	11.736714170	12.508350000	14.348062500	12.715840830	13.058595000	-2.072904785	13.737968800	-5.141349201	2.11x10^-4	8.09x10^-3	0.834938986
KERA	6.024674500	5.942816167	6.178224417	5.863225760	7.707717878	6.833794667	4.394543739	4.001531266	3.103897314	3.857256188	4.801898945	5.424732500	-2.161098906	5.344526112	-5.139496079	2.12x10^-4	8.09x10^-3	0.831810979
GMPS	10.594269500	10.356684420	10.220297250	10.220297250	10.082204580	10.252663830	11.693052500	12.753943490	11.165135830	11.539753330	11.667049170	11.163702840	1.376036721	10.975754500	5.139205432	2.12x10^-4	8.09x10^-3	0.831320333
SLC38A4	12.326328330	12.181217500	12.710098330	12.845187500	13.060169800	12.483070000	8.245696250	10.116788500	10.783870830	9.410937750	9.561545972	11.976899170	-2.585055498	11.308484160	-5.135845537	2.13x10^-4	8.12x10^-3	0.825647564
TDO2	15.270820000	15.785611740	16.498569070	15.839000670	15.266183330	15.831213330	9.966510583	12.678839900	14.336365980	11.107767500	13.606414610	9.467939500	-3.887926681	13.804603020	-5.133585326	2.14x10^-4	8.14x10^-3	0.821830577
F11	13.610458970	13.901026470	13.231475670	13.856215830	14.051256350	13.226265830	9.013393000	10.188661330	12.009327500	10.581997580	12.432635000	11.808153860	-2.640421808	12.325905620	-5.132317158	2.15x10^-4	8.14x10^-3	0.819688610
SULT1C2	2.974279539	4.893385750	1.027909096	3.709389502	0.000000000	0.724854625	8.781366250	9.538154917	5.554586500	8.392875511	7.739055917	4.509183048	5.197567272	4.820420054	5.128165044	2.16x10^-4	8.18x10^-3	0.812673996
ECHS1	15.596337160	16.523278330	16.694060830	16.498569070	16.413585700	16.352684520	14.061328330	14.260457500	14.796785240	15.331407500	15.346731670	15.285263930	-1.499423574	15.596707480	-5.121775985	2.19x10^-4	8.26x10^-3	0.801875512
ANXA2	13.231475670	12.670152910	11.813993860	11.739930550	11.060306230	12.838492390	15.133164100	13.737271730	14.408374890	14.932996510	14.228291700	13.474101550	2.093308146	13.272379340	5.118078802	2.20x10^-4	8.29x10^-3	0.795624075
NIT2	13.229520830	13.455956450	14.107919170	14.003396670	13.795005830	13.565859780	12.332612500	12.179341670	12.740280000	12.775040000	12.856810000	12.609125430	-1.110741521	13.137572360	-5.116778375	2.21x10^-4	8.29x10^-3	0.793424770
CNGA1	8.670001750	8.415268917	9.599504000	9.248752500	9.911877083	8.494295333	5.192526000	6.958084663	7.986773167	5.303528333	7.299905567	4.953885250	-2.774166100	7.669533547	-5.112505053	2.22x10^-4	8.33x10^-3	0.786195972
ZXDC	8.004282750	8.219331833	8.218272166	7.998460750	9.383562700	8.395360954	6.873515083	7.056728173	7.046299739	7.079676376	7.265926583	7.295391833	-1.266955561	7.736400745	-5.112291364	2.22x10^-4	8.33x10^-3	0.785834427
ADH1A	15.770615910	15.875747740	17.113763050	16.589152100	16.671959530	16.346064520	11.491547720	14.428340390	13.574015680	14.474709550	13.138870760	15.106604600	-2.692202361	15.048449300	-5.110522774	2.23x10^-4	8.34x10^-3	0.782841855
NHEDC2	8.429828500	8.558733833	8.984610500	8.936347333	8.489273500	7.440560250	6.441452069	7.080333580	7.648935975	6.991954583	6.964833583	6.821863750	-1.481663396	7.732393955	-5.107783509	2.24x10^-4	8.35x10^-3	0.778205966
CRYL1	14.489308080	14.405463330	14.814430000	14.735289170	14.623027500	14.599998330	11.340801670	11.713410000	13.027954170	12.624732980	13.061445330	13.999001500	-1.983361794	13.619571840	-5.107642420	2.24x10^-4	8.35x10^-3	0.777967161
C6orf167	4.711422417	4.832884083	4.026572833	4.085357833	3.542422583	4.844092417	7.149435917	7.577868667	5.692686667	6.126587333	5.280798333	6.501140167	2.047627486	5.364272438	5.102962856	2.26x10^-4	8.40x10^-3	0.770045004
ATAD5	4.197726667	4.110535083	1.027909096	1.953020941	3.832239829	4.270244500	6.342232000	7.101637600	5.751804083	5.593264037	5.573839750	6.621146500	2.932041309	4.697966674	5.101438860	2.26x10^-4	8.40x10^-3	0.767464325
MDK	10.221488080	11.116113330	8.527505251	8.648874794	9.468987833	12.124820000	13.476430830	13.963166670	12.079180830	13.236152790	12.971070000	12.506266120	3.020746324	11.528338040	5.099018156	2.27x10^-4	8.42x10^-3	0.763364523
MLF1IP	6.831336083	8.406140583	7.470390083	7.394191116	7.047149333	8.791548583	10.271335650	11.672987500	10.946412330	9.884209347	8.733595843	9.559628907	2.521235633	8.917410447	5.090863752	2.31x10^-4	8.52x10^-3	0.749547838
C14orf105	8.067337583	8.007241967	7.779983155	7.926196250	8.028912888	8.282861417	7.752082333	5.822493500	5.721190417	5.495594167	4.200654667	5.409936423	-2.281763626	6.874540397	-5.087963508	2.32x10^-4	8.54x10^-3	0.744631460
WDR23	12.534534170	12.247748890	11.639483950	12.532067260	12.570289620	12.090120830	10.177739310	10.388082310	10.685174610	10.268332510	11.073563190	11.811181810	-1.535028497	11.501526540	-5.087891596	2.32x10^-4	8.54x10^-3	0.744509544
DHODH	11.851010830	13.171570950	11.873603700	12.996604170	12.330236000	10.785525830	9.186280333	9.615351333	10.207636170	10.703520810	10.700218330	9.935907000	-2.109939587	11.113122120	-5.085003949	2.33x10^-4	8.55x10^-3	0.739613321
MBOAT4	3.112329417	0.177961250	1.027909096	2.616904750	2.939213083	2.709240500	6.427399901	4.627958583	4.878163250	5.198798951	4.018537944	4.367930487	2.822538503	3.508528934	5.084394618	2.33x10^-4	8.55x10^-3	0.738580005
MEP1B	1.150896867	4.754372667	4.950853662	4.193651083	3.389958975	4.434515868	0.067004467	0.141257917	0.249255292	0.102078833	1.246168675	2.150964067	-3.152919979	2.235914864	-5.084017379	2.33x10^-4	8.55x10^-3	0.737940248
C14orf159	10.972960830	11.093442680	10.288758500	10.231677250	10.795427850	10.886254500	10.033934500	9.266959006	9.740022874	9.262917417	9.200449417	9.629821977	-1.189069403	10.116885570	-5.080289286	2.35x10^-4	8.58x10^-3	0.731616741
SNHG1	9.807828355	10.322267680	9.829693417	9.933454000	9.288350278	9.914582421	11.537015000	11.944365830	11.111191670	11.515826670	10.601587000	10.679657500	1.382244585	10.540484990	5.073715685	2.37x10^-4	8.67x10^-3	0.720462004
CECR7	10.943960000	11.113880000	10.455723370	10.689110180	10.718725840	11.036322500	9.098400333	9.748070583	9.695431192	9.348297917	10.389556330	9.386472167	-1.215248894	10.218662530	-5.064846821	2.41x10^-4	8.78x10^-3	0.705402861
B3GALNT2	7.098339583	7.552893833	6.062038719	6.230605083	6.670284495	6.560447513	7.970892333	7.991728137	7.743984067	8.092319068	8.000502083	8.182178768	1.301165872	7.346351140	5.063218000	2.42x10^-4	8.79x10^-3	0.702635962
COL15A1	6.174298333	5.138264333	5.311168417	5.206498333	4.383946250	4.981432028	7.864869917	7.825445333	7.661507808	7.979284753	5.810315417	6.595847067	2.090277100	6.244406499	5.061042006	2.43x10^-4	8.81x10^-3	0.698938998
BLM	7.894866583	8.061424333	6.618726349	6.461196513	7.107153917	7.712765117	10.296988670	10.123840250	9.286748128	9.791283383	8.853759214	8.141208435	2.106282544	8.362496741	5.059214137	2.43x10^-4	8.82x10^-3	0.695832979
ALDH6A1	14.231930020	14.269501030	14.028703290	13.948342870	14.104921710	13.613305850	9.802583993	10.811364690	11.384995770	10.345274160	9.708385646	13.950420980	-3.032279921	12.516644170	-5.056517097	2.45x10^-4	8.84x10^-3	0.691249164
NAAA	10.374500250	9.658775464	10.472544500	10.470453160	10.472544500	9.904635333	9.012580333	8.478099833	9.309052270	9.225514907	8.645055417	7.667000000	-1.502691741	9.474229664	-5.050209289	2.47x10^-4	8.92x10^-3	0.680524629
TMEM136	7.896505667	7.215726083	7.522199943	7.239525250	6.123045250	8.696349667	9.605643059	8.939315667	9.012580333	9.156428338	9.337896250	9.441971982	1.800080628	8.348932291	5.044862240	2.49x10^-4	8.99x10^-3	0.671429240
C10orf92	1.956321020	2.540193083	4.569727083	4.090255500	3.160170723	2.546498296	-0.046898298	0.141257917	0.249255292	2.430095167	0.005980223	0.132998375	-2.658412838	1.814654532	-5.035824076	2.53x10^-4	9.11x10^-3	0.656046184
PHLDB2	10.517016670	10.269640740	11.093003160	10.910091670	10.835816700	10.790461620	8.538427150	9.655641250	9.876141000	9.592107182	9.415193164	9.690831667	-1.274614856	10.098697660	-5.033443366	2.54x10^-4	9.14x10^-3	0.651992302
NCRNA00152	9.225948948	9.380996000	8.659987000	7.336274333	8.390140055	9.727678209	11.094077680	10.622986750	10.795870830	11.275372950	10.602630000	9.966510583	1.939404042	9.756539445	5.030675382	2.56x10^-4	9.15x10^-3	0.647277981
RAB26	7.411719750	8.216783083	9.299375274	9.011996750	9.146410917	7.803935833	6.469685009	6.518735096	7.309634000	6.993897000	6.730919167	6.349583917	-1.752961236	7.605222983	-5.030519876	2.56x10^-4	9.15x10^-3	0.647013097
PRMT3	6.377517143	6.526594920	6.560217529	6.720005726	5.436618667	6.619246729	7.927008987	8.255967951	7.496106543	7.704997538	7.097158000	7.972902083	1.368990065	7.057861818	5.028734718	2.56x10^-4	9.16x10^-3	0.643972085
SMYD3	9.306074910	9.396561083	9.296100277	9.090250417	8.940312250	9.612757711	11.116710120	11.951393330	11.546253330	10.761500520	9.695431192	10.647766670	1.679499753	10.113425980	5.024578892	2.58x10^-4	9.21x10^-3	0.636890933
HJURP	0.103028333	-0.136111410	1.027909096	0.147304583	5.280798333	5.205608167	7.412429727	7.300511250	5.594253083	7.195378353	6.620578417	7.317797250	4.968735163	4.422457098	5.023025495	2.59x10^-4	9.22x10^-3	0.634243472
ENOSF1	11.232962270	10.805732280	11.214052750	11.008163940	10.803140200	10.890813330	10.232550210	9.617434500	9.982578083	9.200449417	9.910903035	10.294396760	-1.119425461	10.432764730	-5.021192083	2.60x10^-4	9.23x10^-3	0.631118349
TTC38	12.587302500	12.706097130	12.125419170	12.600463330	12.809747500	12.210061960	10.410919660	10.640956750	11.340801670	11.239225070	11.573878430	11.802944590	-1.338394237	11.837318150	-5.017872914	2.61x10^-4	9.25x10^-3	0.625459513
MC2R	8.796978498	8.799725000	10.730343590	10.759810000	10.867934830	9.834508167	6.064314647	6.915215490	8.215680250	7.908759269	7.898853833	7.990497614	-2.465996496	8.731885098	-5.017764529	2.61x10^-4	9.25x10^-3	0.625274701
WDSOF1	10.305248500	10.772075830	10.451795650	10.946412330	10.302474740	10.544417420	12.284891670	12.951638330	11.506605830	12.084947500	11.832065000	11.223053330	1.426796199	11.267135510	5.014256242	2.63x10^-4	9.29x10^-3	0.619291732
SUOX	9.309052270	8.885636186	9.656736500	9.553717808	9.527750061	9.252533750	7.462894833	7.179119204	8.083436200	7.803111000	8.030467083	8.958772667	-1.444604265	8.641935630	-5.013142729	2.63x10^-4	9.29x10^-3	0.617392410
ARMC9	6.933789904	5.302261525	4.549437329	5.407816408	5.250464962	6.595250879	8.998310501	8.022666459	7.403282820	7.505624426	7.940461528	7.180834817	2.168693257	6.757516796	5.010994675	2.64x10^-4	9.31x10^-3	0.613727987
FYN	10.251127000	10.866330000	10.557763920	10.508627080	10.968181670	10.344105290	9.113727167	9.849281378	9.905212702	9.046220142	9.053063705	9.523423750	-1.167534352	9.998921983	-5.009097229	2.65x10^-4	9.32x10^-3	0.610490554
TMEM206	7.163234083	6.002020951	6.500828333	5.026837298	5.470331669	6.948708083	9.223190195	8.893343583	8.426911417	8.370875671	7.290317057	7.759059250	2.141956126	7.256304799	5.003531917	2.68x10^-4	9.40x10^-3	0.600992122
EED	10.266512720	9.945552693	10.206918110	10.219086820	10.078805870	10.464084420	11.272183330	11.113880000	11.198875040	10.830237500	11.494164760	10.874251090	0.933771850	10.663712700	5.000975357	2.69x10^-4	9.42x10^-3	0.596627357
LOC541471	9.659630853	9.878044833	8.946066167	7.814395083	8.615728685	10.298625080	11.531625990	11.131460830	11.174989170	11.763877500	11.057362500	10.506451310	1.992212766	10.198188170	4.998817903	2.70x10^-4	9.44x10^-3	0.592943279
CKS2	9.407079340	10.457935670	10.346454920	10.141844750	9.842582583	10.532595330	11.600547890	12.452744170	11.529475080	11.031511670	11.438681670	11.160143400	1.414101881	10.828466370	4.996706452	2.71x10^-4	9.44x10^-3	0.589337135
ACOT2	12.706097130	13.113822500	12.716629170	13.057303910	12.994441560	12.769962620	10.139623510	10.849152970	11.660563500	11.769265950	11.087500910	12.251546360	-1.600100613	12.092992510	-4.996641134	2.71x10^-4	9.44x10^-3	0.589225569
FAH	12.062714610	12.034146670	12.389267030	12.281265830	12.163071670	11.895386820	7.930936667	8.803479153	9.921134655	10.912410940	10.747961670	10.540536760	-2.328232131	10.973526040	-4.993491204	2.73x10^-4	9.45x10^-3	0.583844639
CENPL	5.009050500	3.103897314	1.027909096	3.357106700	0.555116033	1.824631733	6.755544333	6.786317063	5.834157083	5.983166583	4.374921583	6.148114500	3.500751628	4.229994377	4.993119470	2.73x10^-4	9.45x10^-3	0.583209528
LAPTM4B	10.278836290	10.069314610	11.317779170	10.281217330	10.810691240	10.163462750	11.996719150	12.789758330	12.700385830	13.599646670	13.119002560	10.971785000	2.042666026	11.508216580	4.992995013	2.73x10^-4	9.45x10^-3	0.582996887
NEDD1	7.030148417	6.584388931	6.562273833	6.123045250	6.391180832	6.836950167	7.979284753	8.262258750	7.810174286	7.291019167	7.419451838	7.662386417	1.149431297	7.162713553	4.982964066	2.78x10^-4	9.60x10^-3	0.565851561
GLTSCR1	13.208523330	14.167545310	13.402731060	14.157576670	12.328470000	12.606591700	11.017105340	11.956901860	10.890182220	10.747961670	10.231087970	12.300090830	-2.121351364	12.251230660	-4.981667435	2.78x10^-4	9.60x10^-3	0.563634296
DPYD	9.951695926	9.584314500	10.255667500	10.131928280	9.967749417	9.648374112	8.377727000	9.305605667	9.121165750	8.362173667	7.691676417	8.340742833	-1.390106401	9.228235089	-4.980945190	2.79x10^-4	9.60x10^-3	0.562399143
ATP8B1	4.422987360	3.362079633	1.027909096	3.637300167	4.171604000	4.420949917	6.387719426	6.153499962	5.947707928	7.645437917	5.924422010	5.622769167	2.773121039	4.893698882	4.975006732	2.81x10^-4	9.68x10^-3	0.552240729
LRRC19	7.284618811	8.744296003	9.458967333	6.751017838	7.679078083	7.246656500	5.747337800	4.438760333	6.497781314	5.566321250	5.525138833	5.358410196	-2.338480807	6.691532024	-4.964553172	2.87x10^-4	9.83x10^-3	0.534346992
CTSL2	6.297686791	5.518169125	5.756845596	5.304093250	2.950058250	5.690424168	9.328080250	11.554244790	9.281444750	9.566505843	5.929321775	10.750149170	4.148744899	7.327251980	4.964345638	2.87x10^-4	9.83x10^-3	0.533991597
SLC27A2	13.950420980	14.392177100	13.358732150	14.213535830	13.571564430	13.714277520	8.527221083	10.226080840	12.422975000	12.024310000	12.090120830	10.584211740	-2.887631419	12.422968960	-4.961243894	2.88x10^-4	9.85x10^-3	0.528679269
SUB1	13.212019040	12.954553330	13.233915000	12.755780830	12.975477500	13.221229170	14.928061490	13.779973330	14.101645830	13.931403920	14.424812600	13.942134170	1.125842746	13.621750520	4.960810305	2.88x10^-4	9.85x10^-3	0.527936562
RBM34	10.506451310	10.167799170	10.870744170	10.610795240	10.070073500	10.606273620	11.832065000	11.679770320	11.266422030	12.242295680	11.116113330	12.234503330	1.256505448	11.100275560	4.958227606	2.90x10^-4	9.87x10^-3	0.523512043
SEC24B	9.105459844	9.410495250	10.754275190	9.968370750	10.317738330	9.634905500	8.440513250	8.503165174	8.629810750	8.254004616	8.666528667	8.583797000	-1.352237569	9.189088694	-4.956857497	2.90x10^-4	9.87x10^-3	0.521164489
ISOC1	12.626191670	12.883526670	12.479209170	12.919145910	12.863086870	12.756607900	10.656450350	11.329418500	12.143516860	11.103994170	11.462425000	12.039509170	-1.298742355	12.105256850	-4.956715760	2.90x10^-4	9.87x10^-3	0.520921620
SYTL5	6.930454167	6.313896333	5.917251083	6.883168222	5.426875500	7.472006750	4.244464500	3.026497000	4.180663967	4.769927671	4.577964750	5.447432244	-2.116116987	5.432550182	-4.956053540	2.91x10^-4	9.87x10^-3	0.519786864
FAM149A	9.050289083	9.144940467	9.597274917	9.409994917	9.849820917	8.719084363	6.439030333	5.586768667	8.512941083	6.377776920	8.204143750	6.833794667	-2.302824874	8.143821674	-4.955017974	2.91x10^-4	9.87x10^-3	0.518012235
LOC283587	9.286305917	9.868476237	9.286041083	8.827129083	9.474013636	9.071726500	6.891407196	8.643068167	8.036519500	7.965289583	8.053367917	7.346737583	-1.479550418	8.562506867	-4.953022671	2.92x10^-4	9.88x10^-3	0.514592513
SSR2	14.101645830	13.745727880	13.460504170	13.707856670	13.664505830	13.931403920	15.721276530	15.372297500	14.921598460	14.633468340	14.770141670	14.448685000	1.209303865	14.373259320	4.951869000	2.93x10^-4	9.88x10^-3	0.512615004
SFXN5	9.664661638	10.072143330	9.476813878	10.136216670	10.274434260	9.148134667	7.212063250	8.261310000	8.589392500	8.165410538	8.935646714	8.506154833	-1.517071101	9.036865190	-4.951523640	2.93x10^-4	9.88x10^-3	0.512022987
BTG3	9.302748338	8.844473417	9.491642417	8.893343583	8.079876321	9.708385646	10.684288330	10.226659250	10.096236180	10.700735830	10.383737920	10.380427170	1.358602493	9.732712867	4.948462716	2.95x10^-4	9.91x10^-3	0.506775234
PDLIM5	11.139394170	11.099344170	10.993606670	11.479593780	11.271560530	11.360702500	10.590435830	9.636996917	10.510159870	9.968178333	10.325564770	9.660042083	-1.108804001	10.669631630	-4.947924753	2.95x10^-4	9.91x10^-3	0.505852800
SMC2	6.242124075	5.449262164	6.837441333	6.228554695	5.361447750	6.647901017	8.497307563	8.814073833	8.479680271	7.356972837	6.828734833	8.846135417	2.009362287	7.132469649	4.945504877	2.96x10^-4	9.93x10^-3	0.501703002
AZGP1P1	9.524526167	10.032616080	10.584211740	10.441605420	10.157963320	9.229167749	4.815796167	6.548950856	8.235435559	6.953102167	7.484796155	8.901043083	-2.838494416	8.575767872	-4.941299657	2.98x10^-4	9.97x10^-3	0.494489660
SLC27A5	16.474262010	16.541165000	16.259149250	16.872188330	17.159998330	16.306540830	11.328819540	13.382825830	14.157576670	13.010965000	12.937239250	16.252249170	-3.090604718	15.056914930	-4.940395227	2.99x10^-4	9.97x10^-3	0.492937949
ACLY	8.579531061	8.466076685	8.459081306	8.712054545	8.424935759	8.885636186	9.092031927	9.366207558	9.632871239	9.681530573	9.622161992	9.983000030	0.975081296	9.075426572	4.939889276	2.99x10^-4	9.97x10^-3	0.492069853
CCDC26	4.689994167	6.150598659	6.028547833	5.674779917	5.458395750	4.568751437	1.731289508	3.860704000	4.086362833	4.006190197	2.659056750	3.096020250	-2.188574037	4.334224275	-4.939458093	2.99x10^-4	9.97x10^-3	0.491330013
C22orf29	5.250159162	5.086126583	5.148478167	5.466216339	5.604668833	5.400606583	6.269709693	6.233050954	6.180313833	6.385586917	6.110084041	7.108139923	1.055104949	5.853595086	4.936968068	3.01x10^-4	9.99x10^-3	0.487057044
CANX	11.824256670	11.704033330	11.407318140	11.701478970	11.736714170	11.912496670	13.116138330	12.562705270	12.702469290	12.575615000	12.527252500	12.356922500	0.925800825	12.177283400	4.934097947	3.02x10^-4	1.00x10^-2	0.482130774
HRASLS5	12.957574170	13.775420280	13.037206670	13.864009170	12.129515000	12.612143330	11.196456300	11.864579090	10.903188790	11.112873790	10.377420890	12.081687500	-1.806610377	12.159339580	-4.932520956	3.03x10^-4	1.00x10^-2	0.479423555
SERPINA11	11.555030840	12.187305980	12.121143430	12.112904150	12.415125000	11.357217500	5.781689406	9.877123333	10.069314610	9.837733331	8.887669054	8.869899000	-3.070883026	10.422679640	-4.932082327	3.03x10^-4	1.00x10^-2	0.478670500
GHR	10.291753330	11.710359090	12.524903420	12.011894170	12.166581630	11.272183330	5.490454233	5.933891583	9.730828980	7.296587390	10.319271080	8.019455000	-3.864531118	9.730680270	-4.925765053	3.06x10^-4	1.01x10^-2	0.467821889
MCM10	4.068880417	5.093567250	4.810694250	5.028022557	5.979375000	6.192464750	8.013449167	8.496982302	6.516859583	7.326509236	6.426775581	7.319656617	2.154538044	6.272769726	4.923866150	3.08x10^-4	1.01x10^-2	0.464559860
PHF19	7.492483044	7.510615066	7.080192355	7.755616483	7.900569583	8.318654917	8.696111250	9.306851583	8.326159532	9.196219417	9.173074583	8.859661906	1.249991137	8.301350810	4.923635644	3.08x10^-4	1.01x10^-2	0.464163854
MCM6	10.813748330	11.003157500	9.478429456	10.952425830	10.202857200	11.655701650	13.513036640	13.740389270	12.184329170	12.204327280	12.138961830	12.418745000	2.015578202	11.692175760	4.923277275	3.08x10^-4	1.01x10^-2	0.463548164
ZADH2	9.233352510	9.613193333	9.626786554	9.481941108	9.404144250	9.099606894	8.302412269	8.680866333	8.464703917	8.553375848	8.723406917	8.499565347	-0.872449003	8.973612940	-4.919618765	3.10x10^-4	1.01x10^-2	0.457261732
DNM1L	8.196878917	8.549828107	7.824176272	7.991290758	7.545902500	8.392454083	9.924295574	9.370293621	8.809812548	8.979908583	9.428976864	9.266959006	1.213285927	8.690064736	4.919130971	3.10x10^-4	1.01x10^-2	0.456423419
LOC202227	13.501242500	13.552219410	13.439404170	13.791082500	13.354503000	13.379516670	14.650682500	14.984121670	14.431261670	14.455752890	14.597825000	13.928514170	1.005031607	14.005510510	4.919060717	3.10x10^-4	1.01x10^-2	0.456302678
MRPS23	9.979437307	9.797325049	10.927324170	10.619037000	9.891503083	10.175586730	11.895386820	12.136832500	11.460007500	11.491547720	10.837822500	11.675309170	1.351115478	10.907259960	4.918488634	3.10x10^-4	1.01x10^-2	0.455319459
SLC39A10	7.347991917	6.254746114	7.283524240	6.436674362	6.897410759	6.994270917	8.846915667	8.068537167	8.410749500	9.549859882	7.953155977	7.884748300	1.583224697	7.660715400	4.915328920	3.12x10^-4	1.02x10^-2	0.449888175
RAD54B	6.346822000	5.839141333	6.634836083	6.381961761	7.336867674	6.921909417	8.284580083	8.662279083	7.510615066	7.942027733	7.534507000	8.070787333	1.423876339	7.288861214	4.912205514	3.14x10^-4	1.02x10^-2	0.444517979
DHRS1	11.578761390	12.176635310	13.093274820	12.517956860	12.803381670	12.312732500	8.983813667	9.180737097	10.365775670	11.144767750	9.538154917	11.614687500	-2.275800990	11.275889930	-4.911788584	3.14x10^-4	1.02x10^-2	0.443801036
SDHA	11.962217910	12.330236000	12.564049170	12.256294170	12.128505830	12.119037500	9.973355604	10.070425110	10.735461390	10.983139170	11.400361540	11.555778510	-1.440303210	11.506571820	-4.906410848	3.17x10^-4	1.03x10^-2	0.434551500
ZNF138	6.749236554	6.661473500	7.045227025	6.210517333	6.815333000	6.634527667	7.324163637	8.143555333	7.897206167	7.364771333	7.813883483	8.004806895	1.072011962	7.222058494	4.903910918	3.18x10^-4	1.03x10^-2	0.430250373
B3GAT1	9.130214462	9.043441790	9.399702000	9.363164417	10.212213250	8.848300917	5.041992695	8.730626358	5.596025864	7.447542667	7.092093211	6.099440265	-2.664885963	8.000396491	-4.900370826	3.20x10^-4	1.03x10^-2	0.424158214
CKAP2L	1.754594850	2.690799494	3.915384808	3.460842292	4.909448667	1.039792508	6.622753751	7.492179583	5.429728833	6.342943030	4.683769879	6.211200333	3.168618799	4.546119836	4.900142655	3.20x10^-4	1.03x10^-2	0.423765495
FIGNL1	7.371900000	6.587932917	7.188945278	6.945819958	6.141914250	6.726871667	8.529050250	8.232585250	7.846634250	8.066210390	7.541787540	8.168022750	1.236817727	7.445639541	4.900004902	3.21x10^-4	1.03x10^-2	0.423528398
RAP2A	9.042568583	8.683272750	8.695637417	8.371742624	8.869899000	9.485633005	10.315395860	10.002315670	10.298215850	9.786378250	9.514111513	10.080154500	1.141303044	9.428777085	4.899453375	3.21x10^-4	1.03x10^-2	0.422579093
LOC728732	13.467075000	13.052014170	13.116947920	12.864753450	12.914980830	13.238201260	14.499251670	14.485637500	14.249427500	14.019767500	13.704838510	13.837695830	1.023774312	13.620882590	4.896012194	3.23x10^-4	1.03x10^-2	0.416655113
GCH1	10.174352830	10.488750080	11.130849720	11.152251700	10.735461390	10.032125830	8.672411917	9.289773417	9.588654000	8.830963187	7.889874513	9.650613500	-1.631916838	9.803006842	-4.895742686	3.23x10^-4	1.03x10^-2	0.416191089
CLPX	11.605291670	11.848465000	11.831549170	12.088314040	12.009327500	11.889154170	10.216863330	10.014836530	10.881253870	10.865983430	10.518457420	11.454614850	-1.220015352	11.268675910	-4.894584185	3.24x10^-4	1.03x10^-2	0.414196335
C4orf34	13.576397260	13.172923330	14.167545310	13.693970830	13.565859780	13.291525830	11.764610410	11.017840010	12.982820830	11.489165270	12.549737500	12.085982500	-1.596344305	12.779864910	-4.894319309	3.24x10^-4	1.03x10^-2	0.413740235
C5orf34	4.287642167	0.177961250	1.027909096	0.147304583	3.571830080	3.350571233	5.650991250	6.869578626	5.658490303	5.480260069	4.514986500	6.762280800	3.728894856	3.958317163	4.893219353	3.24x10^-4	1.03x10^-2	0.411846080
CD34	8.369840097	6.722698131	6.568375503	5.675978417	5.828870610	7.221908500	8.144568750	8.768377152	9.938841667	8.935975228	8.602708917	9.104365917	2.184527729	7.823542407	4.888646160	3.27x10^-4	1.04x10^-2	0.403969177
CYP2C9	15.523413520	15.770615910	16.094965830	16.049060000	16.010482210	15.203157500	9.522406022	11.634220000	11.704033330	13.181998330	10.508267580	15.350637500	-3.791688699	13.879438140	-4.887551656	3.28x10^-4	1.04x10^-2	0.402083578
DBT	9.220325083	8.846463655	9.457473808	9.317335307	9.407345833	8.675185083	7.686406634	7.276693831	7.633453241	7.090139585	6.604166083	8.834039917	-1.633204913	8.337419005	-4.887282553	3.28x10^-4	1.04x10^-2	0.401619947
CHAF1A	8.323942250	8.489850825	8.697247957	8.445010083	8.310480040	9.222248500	9.444445891	10.347638390	9.656274417	10.091340220	9.245488167	9.941146083	1.206258920	9.184592736	4.886895169	3.28x10^-4	1.04x10^-2	0.400952515
ARHGAP18	8.852702420	8.414023398	7.836332892	8.058669783	8.379022984	8.638758818	10.370078980	9.453036894	9.703184751	9.190963079	9.253484053	9.693804885	1.247507058	8.987005245	4.886263505	3.28x10^-4	1.04x10^-2	0.399864164
CKAP2	6.910792583	6.622395750	6.387719426	5.503258917	5.612956833	7.918252946	10.011688250	9.143810000	8.572243167	8.444837583	7.575238341	8.785223833	2.262944120	7.624034802	4.884603538	3.29x10^-4	1.04x10^-2	0.397003801
BZW2	10.753451050	10.622491080	10.501024000	11.059580000	10.280170370	10.445081670	12.929507630	12.247030340	11.306926860	11.822196450	11.661452500	11.724510000	1.338304269	11.279451830	4.884227307	3.29x10^-4	1.04x10^-2	0.396355450
GK5	4.804997500	4.665470250	4.654607667	4.556875870	4.620887083	5.329624417	6.266907236	6.488940624	5.399487417	5.667032946	6.380783935	7.269542667	1.473372006	5.508763134	4.883417068	3.30x10^-4	1.04x10^-2	0.394959117
GALT	12.783534170	13.116138330	13.061445330	12.794443330	13.016705830	13.044241670	11.022049670	11.618355830	11.667888330	12.133800830	11.698186430	12.523552950	-1.192112436	12.373361890	-4.881155450	3.31x10^-4	1.04x10^-2	0.391061073
PLSCR4	12.256294170	12.141837350	11.527367500	12.364078460	11.909026780	11.306261110	11.242888570	10.053513600	11.056169170	9.956389417	10.495506130	10.092499080	-1.434649902	11.200152610	-4.879368333	3.32x10^-4	1.04x10^-2	0.387980377
hCG_1815491	7.126541000	6.106814667	6.193324146	7.325970167	5.183666167	6.032953583	11.146885020	10.259925920	9.314048417	6.579189049	10.134852540	11.317779170	3.463901730	8.060162486	4.878699659	3.33x10^-4	1.04x10^-2	0.386827584
CYB5D2	10.129340450	9.943534750	10.798002500	10.803925700	10.628062500	9.861627327	8.482653933	8.781609667	9.098400333	9.704058750	8.530462952	9.366578264	-1.366788221	9.677354760	-4.878370670	3.33x10^-4	1.04x10^-2	0.386260386
EIF3E	13.726085000	12.927648330	14.284000590	13.583144870	13.402731060	13.465596140	14.602905830	14.940683680	14.623027500	15.051587890	14.455752890	14.610596670	1.149224745	14.139480040	4.873063067	3.36x10^-4	1.05x10^-2	0.377107734
FERMT1	5.908777500	5.119232583	4.937379035	5.050475333	3.751777333	5.680023500	8.928886550	7.783458583	5.718571167	7.461232613	7.116551667	8.092912500	2.442324632	6.295773197	4.870648571	3.37x10^-4	1.05x10^-2	0.372942834
RAD18	6.344839333	5.941593833	6.632574391	5.870669750	5.894510508	6.387040895	7.082353856	8.212806250	7.377044167	7.564397000	6.785062667	7.814116833	1.294092010	6.825584124	4.868196469	3.39x10^-4	1.06x10^-2	0.368712270
ADAM9	6.775206023	5.864935671	6.556318989	6.059662485	4.907772730	6.363528837	8.965154393	8.806914560	7.877669320	8.763382021	6.813570161	7.603309121	2.050429140	7.113118693	4.866841522	3.40x10^-4	1.06x10^-2	0.366374262
CCL26	3.701963000	2.715781750	1.027909096	3.371236567	4.545885000	4.751251333	7.064085917	6.599869167	6.910993975	6.595847067	9.325569711	4.936679417	3.553169751	5.128922667	4.864109620	3.41x10^-4	1.06x10^-2	0.361659531
ANG	17.321425240	17.651784790	17.398955860	17.398955860	17.497568390	16.736707170	13.455956450	16.119017200	15.548478200	15.970527130	13.669050820	15.561358540	-2.280168159	16.194148800	-4.861866304	3.43x10^-4	1.06x10^-2	0.357787261
MPDZ	11.550359590	11.194187500	11.916773330	11.800235000	11.515202750	10.996964170	7.809167833	9.015706270	9.697278347	9.023662167	8.982991745	11.212258330	-2.205442940	10.392898920	-4.861715586	3.43x10^-4	1.06x10^-2	0.357527077
SPATA18	8.050611467	7.686863000	8.897260417	8.669351997	7.517024974	7.528803917	6.016281000	6.135427636	7.319656617	6.604543295	6.378747630	6.709471232	-1.530964727	7.292836932	-4.860079492	3.44x10^-4	1.06x10^-2	0.354702502
ASS1	12.301837920	11.736714170	12.588628330	13.458110080	12.814403330	11.587705000	5.839611646	9.196755583	9.028160500	9.812480877	9.831903403	10.775207150	-3.333879945	10.747626500	-4.854171951	3.47x10^-4	1.07x10^-2	0.344500681
GLTPD2	10.145155830	11.079791670	10.962523330	11.229079170	11.075594820	9.958255750	6.964833583	9.009639465	8.951884417	9.750318833	8.178566747	9.056516513	-2.089773502	9.696846677	-4.853045380	3.48x10^-4	1.07x10^-2	0.342554664
ADM2	6.776897802	7.020630129	8.853080137	8.842248917	7.498078055	6.050058351	4.257397056	4.532063569	5.926208951	5.986306026	4.468180270	4.610216586	-2.543436822	6.235113821	-4.850221716	3.50x10^-4	1.08x10^-2	0.337676381
PLVAP	6.198582429	5.717203250	5.031001167	5.275727504	5.824653500	5.872171283	6.697190167	6.282819750	7.737860167	7.022631250	7.831388500	7.940461528	1.598835371	6.452640874	4.846583295	3.52x10^-4	1.08x10^-2	0.331388933
VDR	7.889203667	8.854752932	6.474517750	7.298820987	7.153504755	7.650379500	10.151265250	8.873069417	8.994143250	8.906162833	10.037373080	9.831903403	1.912122941	8.509591402	4.845106430	3.53x10^-4	1.08x10^-2	0.328836305
C15orf42	5.062265657	5.257003583	5.545185583	5.461362750	6.006631000	6.034258333	7.753056667	8.399712417	6.290268307	7.450546583	7.012446519	6.620268333	1.693265320	6.407750478	4.841148307	3.55x10^-4	1.09x10^-2	0.321993628
PLK1	5.891282333	6.040212667	5.994733583	5.825447333	6.910993975	6.869099833	8.524643073	9.533746167	7.144880333	8.449807167	7.330503750	8.053367917	1.917529780	7.214059844	4.838568432	3.57x10^-4	1.09x10^-2	0.317532510
POU2F2	6.026371917	5.733058167	6.548950856	5.566683750	6.992491062	5.901940758	4.478680246	4.024719912	4.723936312	4.643346343	5.384739000	4.899564750	-1.435751658	5.410373589	-4.836315948	3.58x10^-4	1.09x10^-2	0.313636795
SLC17A6	6.177363087	6.238882943	6.764049917	6.355354583	7.131764167	6.414298936	4.733019333	4.659457833	4.935616511	4.652073794	5.633221333	6.018875669	-1.408241526	5.809498176	-4.832491573	3.61x10^-4	1.10x10^-2	0.307020936
RARS	13.127323330	13.069143330	12.938694800	13.070407250	13.092220830	13.706686080	13.933647500	14.761021670	13.808483920	14.213535830	14.218671580	14.380580650	1.051910918	13.693368070	4.831701810	3.61x10^-4	1.10x10^-2	0.305654469
SMOC1	10.340862080	11.090237500	10.393259000	11.141649120	11.609462500	10.629531040	8.537648539	9.516985000	8.963848250	9.375179066	9.166410495	10.326752030	-1.553029643	10.090985380	-4.828205994	3.63x10^-4	1.10x10^-2	0.299604941
RHEB	11.280783640	10.947059170	11.786975130	11.399667830	11.056169170	11.350725830	11.838105830	12.693703330	12.289409600	12.504687500	12.307546520	12.317348540	1.021570093	11.814348510	4.827261546	3.64x10^-4	1.10x10^-2	0.297970293
DKK1	5.103079826	5.308375495	5.142707000	5.761854500	5.180524667	5.456197230	9.455482175	10.839379160	9.501775104	11.228759460	5.054135250	11.392985830	4.253296378	7.452104642	4.827049634	3.64x10^-4	1.10x10^-2	0.297603500
H2AFV	12.039509170	11.747642290	12.059000000	11.822196450	11.830625000	12.290254290	13.465596140	13.411253030	13.097224170	12.841619890	12.515346670	12.741241200	1.047175649	12.488459020	4.826245356	3.65x10^-4	1.10x10^-2	0.296211343
CPT2	12.276502740	13.095866670	11.588717510	11.927837500	12.239263330	12.412231670	10.422217080	9.453559250	10.277348480	10.161967330	11.627165500	11.068332500	-1.754971547	11.379250800	-4.823263863	3.66x10^-4	1.11x10^-2	0.291049814
LOC644656	6.623081813	6.574401833	6.724034917	6.153125750	6.899575626	6.783436142	7.653208424	7.874550731	7.421163833	7.382910686	7.320767826	7.742165323	0.939518457	7.096035242	4.821688473	3.67x10^-4	1.11x10^-2	0.288322044
RANBP3L	7.233564833	5.982288250	8.005216142	7.130036667	5.869332667	4.632529333	1.111464983	2.893434518	2.242264025	4.172656417	1.047173056	5.212360750	-3.695602357	4.627693470	-4.820979302	3.68x10^-4	1.11x10^-2	0.287094017
F9	15.839000670	16.352684520	15.979025980	16.222036140	16.277708490	15.257157500	9.992593333	12.286595000	14.589346970	11.695969280	14.616786810	13.024740000	-3.286930316	14.344470390	-4.818564175	3.69x10^-4	1.11x10^-2	0.282911395
SAC3D1	9.662499750	9.296679863	9.097220833	8.996039000	9.794646917	9.621811167	10.723990000	10.185517190	10.296499200	10.805732280	10.204102670	10.466372390	1.035552701	9.929259272	4.817540597	3.70x10^-4	1.11x10^-2	0.281138488
LOC131055	13.432378330	13.483612500	13.399404170	13.661868330	13.310156670	13.212019040	14.654142500	14.872041500	14.324220830	14.400620830	14.599998330	13.767053330	1.019773049	13.926459700	4.814017209	3.72x10^-4	1.12x10^-2	0.275034688
GUCA2B	6.928332750	6.958084663	8.651073752	6.651385825	7.220497750	6.889285417	4.658217000	4.997550568	5.113018902	5.307332250	6.203807866	6.090531362	-1.821367035	6.305759842	-4.808181180	3.76x10^-4	1.12x10^-2	0.264920969
STEAP3	12.831000010	12.685930180	11.017840010	12.283256670	12.635072500	12.343476670	9.316663608	9.960437577	9.015706270	9.630815333	12.109599560	9.193736125	-2.428269593	11.085294540	-4.808173765	3.76x10^-4	1.12x10^-2	0.264908115
AFARP1	9.483535273	9.793224936	10.783095810	10.409001630	10.161967330	9.868999905	6.972459446	7.727197483	7.630711451	9.303085694	8.132242858	9.141159742	-1.932161367	9.117223462	-4.807748798	3.77x10^-4	1.12x10^-2	0.264171482
LONP2	11.780298530	12.684578540	11.417810090	12.166581630	11.571758330	11.823385830	10.055148070	10.489328120	10.404185580	10.149362310	10.560612750	11.457917540	-1.387976429	11.213413940	-4.806160132	3.78x10^-4	1.12x10^-2	0.261417496
KCNJ16	9.462880917	9.824403333	7.478301000	8.690916583	8.412983167	9.525711750	8.162667000	2.866732500	3.215108583	5.692257917	5.962100667	4.457492833	-3.839806208	6.979296354	-4.798395468	3.83x10^-4	1.14x10^-2	0.247952541
XPO5	6.505781358	6.319604167	5.692257917	6.392742707	6.532318000	6.171838270	7.685734894	8.422493040	7.413246417	7.094776472	6.955458250	7.972000086	1.321527790	6.929854298	4.797411240	3.83x10^-4	1.14x10^-2	0.246245198
HNRNPA1L2	13.437023640	12.836511670	12.898906670	12.782212480	12.755780830	13.090553330	14.448685000	14.641216670	14.011760630	14.031627500	13.633268000	13.672379760	1.106324824	13.519993850	4.794152623	3.86x10^-4	1.14x10^-2	0.240591567
C22orf36	8.777781667	8.912871500	8.844473417	8.740019200	9.513282750	8.689343683	6.871096250	7.424850167	8.229057000	7.411719750	7.557513424	8.250072583	-1.288910507	8.268506783	-4.793781140	3.86x10^-4	1.14x10^-2	0.239946964
STX1A	5.667969583	5.688505557	5.442791167	5.578723926	5.350210500	5.703316579	6.819432080	7.093645333	6.165159446	6.610618750	6.541664167	6.160790667	0.993298855	6.068568980	4.786540957	3.91x10^-4	1.15x10^-2	0.227380104
PAPSS2	10.653050670	11.192775890	11.351816670	11.675309170	10.959408220	10.786551670	9.575999466	9.854156250	10.301980330	9.904635333	9.915651582	10.396625240	-1.111644014	10.547330040	-4.786171715	3.91x10^-4	1.15x10^-2	0.226739024
AGXT2	11.749804570	11.771705430	12.191998470	12.440158390	12.458791250	11.489753940	5.769539852	8.865726012	9.598225451	10.040125170	8.624148315	10.521959370	-3.113747979	10.460161350	-4.784904309	3.92x10^-4	1.15x10^-2	0.224538413
SPARC	13.611982500	12.376025000	12.269798040	12.028298330	11.444417500	13.367279180	14.458384170	14.645585830	14.853866670	15.419674170	14.411908330	13.329760000	2.003563103	13.518081640	4.784480430	3.92x10^-4	1.15x10^-2	0.223802381
DPP7	10.948122500	11.029521040	10.733034170	10.858398330	11.322879170	10.658898330	10.007703420	9.304714876	10.115076350	10.390407420	9.543725078	9.700276030	-1.081491728	10.384396390	-4.779864260	3.95x10^-4	1.16x10^-2	0.215785262
RGN	16.066396960	15.809947680	15.801830830	15.054628330	15.699783530	15.096034940	12.321990190	14.444107500	14.138350710	12.959059170	13.689375830	14.674849550	-1.883481555	14.646362930	-4.778663301	3.96x10^-4	1.16x10^-2	0.213699047
FAM83D	4.320977333	2.510324083	6.130380667	4.160975524	5.479782750	4.081160750	8.333550209	9.431039250	8.937463460	9.352207167	4.742060417	9.490667000	3.933897732	6.414215717	4.776334561	3.98x10^-4	1.16x10^-2	0.209653204
SPG7	10.006258520	10.365775670	9.845689641	10.515626510	10.615693370	10.285270150	9.570103333	8.964879987	9.190963079	8.504577390	9.135423000	9.547563633	-1.120133906	9.712318690	-4.775956750	3.98x10^-4	1.16x10^-2	0.208996746
CCT5	12.236897500	12.490677700	11.986949170	12.105474170	11.704033330	12.214605830	13.729899170	13.729899170	12.722528090	13.636688060	13.194007780	12.787183720	1.176928047	12.711570310	4.775939454	3.98x10^-4	1.16x10^-2	0.208966694
NMB	9.539316333	9.637965250	9.720402417	9.573526125	8.842724314	9.786790750	10.339936550	11.753108330	10.995982170	11.756670000	11.010385880	10.185517190	1.490145824	10.261860440	4.773205304	4.00x10^-4	1.17x10^-2	0.204215476
SESTD1	7.853890096	7.063776756	6.477296500	6.601301583	5.874291551	6.774248951	8.763382021	8.521397083	7.918815352	8.446041333	7.679078083	8.506634500	1.531757156	7.540012817	4.771881679	4.01x10^-4	1.17x10^-2	0.201915024
SCNM1	10.355340080	10.191233100	10.174352830	9.851634014	10.104299580	10.540536760	11.373850000	11.159603330	10.734068330	11.449451370	10.902232820	11.448196670	0.975001024	10.690399910	4.766768606	4.05x10^-4	1.17x10^-2	0.193026411
SUMO2	13.792820480	13.645805830	13.611982500	13.472104260	13.329760000	13.963166670	14.560651670	14.788584040	14.548032070	14.431261670	14.206379170	14.555046670	0.879052589	14.075466250	4.766721674	4.05x10^-4	1.17x10^-2	0.192944808
C20orf56	14.856110710	15.517980830	14.257119270	15.601630830	15.172405830	14.812475000	10.714058400	12.669144310	13.916280000	12.122508330	13.376485320	13.487657500	-2.321931436	13.875321360	-4.766622815	4.05x10^-4	1.17x10^-2	0.192772917
DFNA5	7.423918083	7.238482015	7.410371833	6.846316000	6.669911628	7.624305583	8.383567667	9.312201000	8.416843000	8.922794083	7.649282333	8.817090583	1.381412254	7.892923651	4.762809577	4.07x10^-4	1.18x10^-2	0.186141682
LGSN	9.531050167	8.667297237	8.971846917	8.454218750	9.458967333	6.971976841	6.745295653	6.750031174	4.668951167	4.610216586	4.705553648	7.434518250	-2.856798461	7.247493644	-4.756984529	4.12x10^-4	1.19x10^-2	0.176008287
GLYATL1	15.037449170	15.416103600	16.191085000	15.953466670	15.553156330	15.425322230	9.564497250	10.127889380	13.720734170	11.578761390	14.355154910	13.011962110	-3.536263966	13.827965180	-4.756362040	4.12x10^-4	1.19x10^-2	0.174925131
CCDC5	10.255994920	9.595948058	11.026284740	10.198312670	9.880691479	9.970849667	11.733179170	11.668855000	11.429764460	11.846595710	10.773960000	11.272183330	1.299409358	10.804384930	4.754991735	4.13x10^-4	1.19x10^-2	0.172540572
DPF3	8.308495083	7.790295083	8.269758750	9.544981667	8.287772917	7.360614500	5.641416667	5.655250787	6.305296251	4.739236583	7.490435083	6.587647834	-2.190439133	7.165100100	-4.754354702	4.14x10^-4	1.19x10^-2	0.171431946
FLJ37464	3.878570083	4.509183048	6.051552250	4.662295417	3.680428720	3.217298106	0.067004467	0.141257917	2.090373317	3.203246583	0.453138475	2.305327167	-2.956496617	2.854972962	-4.746460330	4.19x10^-4	1.21x10^-2	0.157689079
PANK1	10.445081670	9.616307083	11.288173360	11.421591740	10.126767160	10.520135750	6.907096480	8.346399737	7.977880500	8.700841417	6.294509196	9.773606833	-2.569620433	9.284865910	-4.740315126	4.24x10^-4	1.22x10^-2	0.146985714
TMEM53	10.644150830	11.267855860	11.185662390	11.223395000	11.258101670	10.585643580	8.654587500	9.304324997	10.271776420	10.152577750	9.798293583	9.764712958	-1.369756020	10.342590210	-4.739333788	4.25x10^-4	1.22x10^-2	0.145276029
D21S2091E	8.487326561	9.303085694	9.067413860	10.057325080	9.953020417	8.435954579	4.295723833	6.059221043	7.076651500	6.745469973	8.012166417	7.320767826	-2.632354267	7.901177232	-4.738233014	4.25x10^-4	1.22x10^-2	0.143358115
RNASEH2B	9.118712750	9.010200583	9.328974167	8.646810217	8.942379237	9.164665583	10.371172380	10.362660500	9.997145667	9.685626917	9.684705917	9.938841667	0.971401752	9.520991299	4.732196081	4.30x10^-4	1.23x10^-2	0.132837026
CBR4	10.583408890	10.478426750	11.784579180	11.624558330	11.189187500	10.333944520	9.178656918	9.063017833	10.343162890	9.544810331	9.509885000	9.318915449	-1.505942792	10.246046130	-4.731532213	4.31x10^-4	1.23x10^-2	0.131679761
ACOT1	13.850044280	14.384721770	13.723884270	14.201233170	14.145089550	14.037082880	11.505687370	12.212616300	12.829497360	13.011962110	12.350630290	13.558063630	-1.478933147	13.317542750	-4.729852295	4.32x10^-4	1.23x10^-2	0.128751053
SUV39H2	7.159476975	7.265519954	7.772074108	7.864445917	7.609478908	7.556618500	8.839530136	9.707074811	8.311368583	9.071933917	8.179679976	8.785537083	1.277918357	8.176894906	4.729035392	4.32x10^-4	1.23x10^-2	0.127326764
BRP44L	14.572626670	15.062044170	15.078143820	14.566435000	14.784152500	14.316076670	12.426985830	13.274514640	14.161611670	13.365191080	13.868217500	12.905315830	-1.396273709	14.031776280	-4.728769758	4.33x10^-4	1.23x10^-2	0.126863608
UGT2B10	16.644134170	16.890013400	17.483762880	17.237363330	17.209380850	16.890013400	12.959059170	14.408374890	15.970527130	15.416103600	14.765550830	15.925766490	-2.151547651	15.983337510	-4.728282367	4.33x10^-4	1.23x10^-2	0.126013773
BCKDHB	9.827621581	10.427530420	11.320319170	10.792158540	10.856632500	10.273709210	7.927987500	8.256763750	8.012850167	7.796569138	8.507823666	10.498882230	-2.082849161	9.541570655	-4.727732001	4.33x10^-4	1.23x10^-2	0.125054096
RPS10	14.893926960	14.020973330	15.225789170	14.925061670	14.757395900	14.968326030	15.809947680	16.044883330	15.770615910	15.770615910	15.607899700	16.066396960	1.046481072	15.321819380	4.726807080	4.34x10^-4	1.23x10^-2	0.123441221
CYP2C19	13.202243570	13.281270490	14.061328330	13.595957500	13.242901670	12.792962500	6.899066043	10.172846080	10.574397230	9.840536563	7.124356833	12.505441200	-3.843336685	11.441109000	-4.725716347	4.35x10^-4	1.23x10^-2	0.121539061
TNFRSF10C	8.402011850	9.387482750	9.204144444	8.934845703	8.341422750	8.945176833	7.425346000	7.515215250	8.054229417	6.885230083	8.165410538	6.953399349	-1.369375615	8.184492914	-4.723551644	4.37x10^-4	1.23x10^-2	0.117763528
VCAN	9.039901084	8.641452167	8.962239045	9.106457151	7.099496083	8.487744167	10.865021670	10.237737510	10.718725840	10.767800830	9.281142796	10.219086820	1.792037629	9.452233764	4.720598370	4.39x10^-4	1.24x10^-2	0.112611659
FOXO1	11.609462500	13.117757500	11.933295830	12.917269770	13.729899170	12.053106670	10.729182500	11.165135830	10.901104970	10.347638390	11.091519170	11.126524770	-1.666614301	11.726824760	-4.719121967	4.40x10^-4	1.24x10^-2	0.110035719
UGCGL1	8.824270250	9.172248083	7.915340583	8.183850923	8.803847417	8.306078000	10.403763860	10.533832420	9.389794940	9.319381763	10.088453810	11.105361810	1.605825557	9.337185321	4.718668919	4.40x10^-4	1.24x10^-2	0.109245212
METTL6	8.112712333	7.980312599	8.914474750	8.335726500	7.351601044	8.150153309	8.977587250	9.889467750	9.619808963	9.493870566	9.040299167	9.456995606	1.272174794	8.776917486	4.718165558	4.41x10^-4	1.24x10^-2	0.108366885
CAMSAP1L1	8.243015710	7.969409167	7.622278917	7.865673917	7.541425127	8.539202917	9.480325500	8.773091583	9.360951833	8.559813583	9.145897917	9.368452402	1.151254511	8.539128214	4.716857254	4.42x10^-4	1.24x10^-2	0.106083843
SLC10A1	13.583144870	13.559620830	13.463119170	13.365191080	13.629737500	13.267505000	7.585589083	7.119342250	10.292690420	9.906392000	10.550730460	12.950470000	-3.743850708	11.606127720	-4.715513435	4.43x10^-4	1.24x10^-2	0.103738602
ZNF409	9.256569000	9.719322917	9.924295574	9.986223036	10.323565610	9.421899072	7.652739500	8.476520000	8.722245685	7.957943015	8.418610494	9.224447000	-1.363228252	9.090365075	-4.711823674	4.46x10^-4	1.25x10^-2	0.097298029
C21orf34	9.826400167	8.949802083	10.140012520	9.755942583	9.834997581	8.821386167	6.567164569	7.611644949	7.972902083	6.963888417	8.819409083	8.299684833	-1.848974528	8.630269586	-4.710403124	4.47x10^-4	1.25x10^-2	0.094817962
HRSP12	14.796785240	15.114873090	15.899503330	15.801830830	15.484697500	15.151515830	11.408808150	11.733179170	14.225525830	12.195447500	12.368034170	14.788584040	-2.588271163	14.080732060	-4.709904580	4.47x10^-4	1.25x10^-2	0.093947521
INTS8	8.715569176	7.859418000	8.202580874	8.277192955	8.108217917	8.364747083	9.826400167	9.093294458	9.006420894	9.362983917	10.140012520	9.102301366	1.167281219	8.838261610	4.706665073	4.50x10^-4	1.25x10^-2	0.088290671
ITGB1	12.380317500	12.153484170	12.016545000	12.297343840	11.929854260	12.595464340	13.303343330	12.940178330	13.563219170	13.420038330	13.513036640	12.703381950	1.011698107	12.734683900	4.705104753	4.51x10^-4	1.25x10^-2	0.085565557
GPD1	10.107848730	10.799709170	11.388542690	11.502630000	11.400361540	10.739513330	7.819119989	7.622501833	9.127518750	8.537233583	10.627563750	9.018321417	-2.197724356	9.890905398	-4.703630844	4.52x10^-4	1.25x10^-2	0.082991078
PIGC	8.788514037	8.578081727	8.707484036	8.479680271	8.559813583	9.024665250	10.060988420	9.895820270	9.497120583	10.115518330	9.024926742	9.879162003	1.055882907	9.217647938	4.701925244	4.54x10^-4	1.26x10^-2	0.080011563
LOC729983	4.506671545	4.974637417	4.132193850	3.197376792	4.491038917	4.518634583	7.570858978	8.883473295	5.604668833	8.509344068	5.815360095	6.043393083	2.767757542	5.687304288	4.701380539	4.54x10^-4	1.26x10^-2	0.079059940
LOC389127	14.697622940	13.671167500	15.285263930	14.833813330	14.439508330	14.581050000	15.885992500	16.074921670	15.987845030	15.745724170	15.326640830	15.933068330	1.240961081	15.205218210	4.699954142	4.55x10^-4	1.26x10^-2	0.076567785
PEMT	9.585496463	10.004774930	11.301800000	10.799709170	11.357217500	9.106977000	7.360994866	7.664978500	7.952214827	8.538905308	9.295597250	8.578289226	-2.127499180	9.295579586	-4.699795896	4.55x10^-4	1.26x10^-2	0.076291287
LOC728971	16.049060000	15.617531000	16.066396960	15.686269170	15.568652560	16.010482210	17.078890000	17.283391740	17.033241410	17.033241410	16.363463330	16.428972500	1.037134750	16.351632690	4.698424561	4.56x10^-4	1.26x10^-2	0.073895066
METTL5	11.015974570	11.105361810	11.838105830	11.497708330	11.146885020	11.179437500	12.370559170	12.508350000	11.864579090	12.231266670	12.221607540	12.338242500	0.958521981	11.776506500	4.695296375	4.59x10^-4	1.26x10^-2	0.068428100
MST1	14.716710830	15.183721670	13.856215830	14.563192000	15.100002500	14.538111440	10.892242370	13.152072500	13.502753330	11.958735830	11.410205000	13.579173910	-2.243795220	13.537761430	-4.694911206	4.59x10^-4	1.26x10^-2	0.067754875
IGF2BP3	7.335811667	6.747107059	6.464790000	6.858672522	7.252308375	6.411563874	11.992566670	11.957932500	9.938179750	11.469117500	6.830064984	9.871346167	3.498159012	8.594121755	4.694768305	4.59x10^-4	1.26x10^-2	0.067505099
NCAPD2	8.004806895	7.292341240	6.516445562	6.462031166	7.742165323	7.234505783	10.085837670	9.559213087	8.417312657	8.882549250	8.878437474	8.124809112	1.782643880	8.100037935	4.693850695	4.60x10^-4	1.26x10^-2	0.065901146
TRPV4	5.430612113	6.089368667	6.733186167	6.300981667	6.425427447	5.987372706	5.195862161	4.635751917	4.636253250	4.859352250	5.332859667	5.284455500	-1.170402337	5.575956959	-4.689973244	4.63x10^-4	1.27x10^-2	0.059122318
ACOX3	8.737640750	9.266055679	8.908691188	8.871505012	9.097682889	8.690526554	8.046648602	7.815011457	7.922225377	7.159052612	8.446771332	7.747679743	-1.072452158	8.392457599	-4.684620815	4.68x10^-4	1.28x10^-2	0.049761731
TJP2	11.242888570	11.559808680	11.028044800	11.422276280	11.092149170	10.671273330	10.353972250	9.325569711	10.465635330	9.891503083	10.194518650	10.029630250	-1.125935256	10.606439170	-4.682544838	4.69x10^-4	1.28x10^-2	0.046130197
HELLS	4.936276714	5.578723926	1.027909096	3.946875389	5.007028108	6.490369750	9.487304558	8.773928583	7.388736417	8.433787333	7.007035314	7.844067667	3.657946148	6.326836904	4.680120131	4.71x10^-4	1.28x10^-2	0.041887941
H2AFZ	12.576553330	12.152045000	12.996604170	12.276502740	12.015859170	12.430101670	14.586311670	14.731719170	14.045013330	14.187874170	12.836511670	13.356881230	1.549440858	13.182664780	4.679269165	4.72x10^-4	1.28x10^-2	0.040398921
GPM6A	7.757745083	7.193499377	9.007770417	8.286668417	5.984359667	8.992702750	4.278591333	1.857424175	6.617847333	5.591462250	4.145866000	2.605930903	-3.687603953	6.026655642	-4.677473157	4.74x10^-4	1.29x10^-2	0.037255970
TTLL4	5.400606583	4.860364008	3.812652250	3.736994833	3.993669333	4.371424333	7.534507000	7.416234956	5.207538667	6.566734000	6.436979083	5.536298583	2.087096825	5.406166969	4.676826152	4.74x10^-4	1.29x10^-2	0.036123634
GAS5	11.377816670	10.213766000	11.079104260	11.124321760	10.466372390	11.606829170	12.895150460	13.158189750	12.121143430	11.877064290	12.108695830	12.310472160	1.433750945	11.694910510	4.675901790	4.75x10^-4	1.29x10^-2	0.034505800
UBD	14.960889690	14.860477500	12.792962500	13.072157790	13.768728190	15.655935990	18.115289540	16.937309100	17.996147940	17.900984480	14.975404680	16.659890430	2.912312416	15.641348150	4.674195870	4.76x10^-4	1.29x10^-2	0.031519792
NACC1	12.023411570	12.689945720	11.969626670	12.546450000	11.563091670	11.537777810	10.233899230	11.372217110	10.432854370	10.438985500	10.753451050	11.158483330	-1.323402140	11.393349500	-4.670914717	4.79x10^-4	1.29x10^-2	0.025775508
COQ9	10.642872130	11.231396940	10.838613330	11.074269170	11.196456300	11.287097780	9.897327848	9.569380667	9.559628907	9.203911904	9.994291250	10.740157580	-1.217667914	10.436283650	-4.670713212	4.79x10^-4	1.29x10^-2	0.025422690
C1orf58	5.718571167	5.767879805	5.988662750	5.646889417	4.986237513	5.336699500	7.492905105	6.954127167	6.441912592	7.871598433	6.215560250	6.912604850	1.407294708	6.277804046	4.670317804	4.80x10^-4	1.29x10^-2	0.024730353
C2orf27	6.631766167	6.305296251	6.237395160	6.529449406	5.643173917	6.093282617	7.476502754	9.004286743	8.007727363	7.721822027	6.723090917	7.903023456	1.566014957	7.023068065	4.668273441	4.81x10^-4	1.29x10^-2	0.021150474
C21orf33	13.735846670	14.097455000	13.606414610	14.138350710	14.016340000	13.499591430	12.015859170	12.966659170	13.158189750	12.497394170	11.935372500	13.065850000	-1.242445611	13.227776930	-4.667363996	4.82x10^-4	1.29x10^-2	0.019557781
C16orf59	6.481121458	7.146633962	7.373254495	7.492905105	6.936144083	7.602910833	9.250279847	9.564897083	8.070787333	8.531579875	7.832401185	8.864555250	1.513588439	7.928955876	4.667085584	4.82x10^-4	1.29x10^-2	0.019070182
C1orf9	11.230805000	10.874432190	10.473642330	10.339936550	10.497551080	11.596395830	12.694618330	11.813993860	12.130625830	12.138961830	11.687628640	12.019597500	1.245443835	11.458182420	4.664510585	4.85x10^-4	1.30x10^-2	0.014559987
ABCA9	7.648137645	7.469879770	8.136428665	8.004806895	9.379069521	7.982366888	4.202582793	5.359910023	6.295996587	4.997550568	6.606317245	7.207989584	-2.325057098	6.940919682	-4.661706276	4.87x10^-4	1.30x10^-2	0.009647212
PRODH2	12.250400970	12.669144310	13.351799170	12.931893210	13.405947190	12.114006670	6.689172882	10.423828620	11.262205830	8.703294190	8.281602535	11.279394520	-3.347282157	11.113557510	-4.659193318	4.89x10^-4	1.31x10^-2	0.005244017
LOC149703	11.454614850	10.530548250	11.494843330	11.571007540	12.130625830	11.225166210	6.676562175	8.292490917	8.203073417	8.779005315	8.883799106	11.191021670	-2.730142237	10.036063220	-4.655972186	4.92x10^-4	1.31x10^-2	-0.000401185
KLHL23	7.134613521	6.778389583	7.809167833	7.066454833	7.724056750	7.270862667	8.289483895	9.256970250	8.947049704	8.482960083	9.303861797	7.828013086	1.387465604	7.990990333	4.652564942	4.95x10^-4	1.32x10^-2	-0.006373957
OR51B4	4.494630560	4.830420958	4.867511917	3.850710250	3.689576250	3.672267833	2.184243725	3.704272586	0.249255292	2.346375000	0.790623267	0.132998375	-2.666224921	2.901073834	-4.651030493	4.96x10^-4	1.32x10^-2	-0.009064257
hCG_1984468	14.020973330	12.886135000	13.828408900	13.665854750	13.238201260	13.583144870	15.257157500	15.368191670	15.229901790	15.257157500	14.720860210	13.828408900	1.406493240	14.240366310	4.648480823	4.99x10^-4	1.32x10^-2	-0.013535156
CNTF	7.942027733	8.335075083	8.995021454	9.483084833	8.499565347	7.706031217	5.048166590	6.216274500	7.445959307	7.007035314	7.025864000	6.516859583	-1.950107729	7.518413747	-4.648066347	4.99x10^-4	1.32x10^-2	-0.014262023
LDHD	11.557179170	12.193851670	12.754918040	12.742718220	12.895150460	12.116064420	7.957022632	8.208359333	9.841060417	9.325948097	10.339004750	12.015115860	-2.762228481	10.995532760	-4.647152422	5.00x10^-4	1.32x10^-2	-0.015864853
DIAPH3	4.116091833	4.987082374	5.170928338	5.369939417	4.861313050	5.170353000	7.226650562	8.158495936	5.891944167	6.024921917	6.158383911	7.185256167	1.828324108	5.860113389	4.646543011	5.00x10^-4	1.32x10^-2	-0.016933686
C8B	12.038639170	12.009327500	12.519146670	12.300090830	12.409248330	10.617797000	6.584050000	8.722245685	10.253925500	10.205300500	9.206582667	10.227372920	-2.782462039	10.591143900	-4.642999516	5.03x10^-4	1.33x10^-2	-0.023149457
CDC7	7.313574567	8.100286094	6.671010992	7.692366708	7.237511955	7.643901667	9.368145667	9.625828583	8.999663484	8.857185151	8.095987447	8.412732425	1.450148462	8.168182895	4.641862004	5.05x10^-4	1.33x10^-2	-0.025145135
GGT5	9.384945000	8.814747733	8.518994000	8.710390427	8.227918753	9.722811333	7.504735050	6.963403982	8.150153309	7.899269417	7.190270017	6.769720333	-1.483709190	8.154779946	-4.640067382	5.06x10^-4	1.33x10^-2	-0.028293988
C14orf53	8.645965000	8.061871583	9.835739083	9.468642917	9.574518182	7.525800750	4.506970856	4.713403750	5.810315417	5.619535083	6.087782670	8.524262250	-2.975044582	7.364567295	-4.639100068	5.07x10^-4	1.33x10^-2	-0.029991405
CYP2A6	14.448685000	12.827869430	14.092214430	14.474709550	14.358253330	13.277850830	6.734070333	3.420420908	11.496023330	9.777849046	9.370625167	10.900389170	-5.296700771	11.264913380	-4.633953448	5.12x10^-4	1.35x10^-2	-0.039024497
CACNB4	1.387273650	0.177961250	1.027909096	-1.026993967	2.883396667	0.961759283	4.650908667	3.977235851	5.622769167	2.835885640	2.533841549	3.789953250	2.999881358	2.401825009	4.629533717	5.16x10^-4	1.35x10^-2	-0.046784384
FAM134B	11.045573650	11.290937060	13.614515830	13.027954170	11.599694280	11.924960980	7.947921380	6.367952083	9.020646509	8.246797974	9.878044833	11.091157500	-3.325185949	10.421346350	-4.628864274	5.16x10^-4	1.35x10^-2	-0.047959960
MAP2K1	11.688615830	11.419408980	13.368955000	12.913931460	12.339904170	11.157491670	10.546053920	10.522868270	10.938443930	10.452050840	9.835739083	9.970849667	-1.770383566	11.262859400	-4.628603433	5.17x10^-4	1.35x10^-2	-0.048418025
CAPN3	7.073425250	7.559015353	8.155059833	8.714314667	7.752082333	6.817698370	5.876940083	6.247745916	6.751017838	5.896083417	6.148842917	6.337233167	-1.468955412	6.944121595	-4.627494690	5.18x10^-4	1.35x10^-2	-0.050365187
C10orf95	8.069072333	7.777577956	8.874313167	8.514573126	9.581004805	8.805077425	7.009580202	6.628535050	6.603730417	7.692366708	7.100157333	7.588795501	-1.499742267	7.853732002	-4.627219836	5.18x10^-4	1.35x10^-2	-0.050847907
HPN	12.562705270	12.633432500	12.825804170	12.544230000	13.136708070	12.230274700	10.373321670	9.743178296	11.445019170	11.544857500	11.736053710	11.471270580	-1.603242299	11.853904630	-4.626830557	5.18x10^-4	1.35x10^-2	-0.051531603
MYO7B	6.238505417	6.361704250	7.008849083	7.168150157	7.635784667	6.641943528	4.226159083	4.395643333	5.407295333	3.904380682	6.154271917	5.627264167	-1.889987098	5.897495968	-4.626381877	5.19x10^-4	1.35x10^-2	-0.052319651
FKSG29	4.982119966	4.894567599	5.103856083	5.499548975	4.370735833	3.551647000	1.289302067	3.997155083	2.823133833	3.116251250	1.013120475	1.087511175	-2.512666929	3.477412445	-4.625820747	5.19x10^-4	1.35x10^-2	-0.053305235
HDAC6	9.332055667	9.652784894	9.516149750	9.799133000	9.951695926	9.203572158	7.749604333	8.025550083	7.718250583	8.339882167	8.522758345	9.289621462	-1.301620737	8.925088197	-4.621797270	5.23x10^-4	1.36x10^-2	-0.060373313
LOC729046	14.342068330	13.618489870	14.164496480	13.824048030	13.785961670	14.287483200	15.296848330	15.397553910	15.084843230	15.484697500	14.654142500	14.570055000	1.077598815	14.542557340	4.621481003	5.23x10^-4	1.36x10^-2	-0.060928986
PDLIM3	9.480325500	8.735394666	8.182415167	7.978665639	7.070567500	10.334509810	11.081261670	10.667096670	11.204552500	11.127006670	10.353972250	10.360891080	2.168817092	9.714721593	4.620564820	5.24x10^-4	1.36x10^-2	-0.062538765
S100A10	12.730006670	12.211440570	12.189230000	11.808153860	11.607466670	12.263568330	15.054628330	13.087711670	13.290013780	13.559620830	13.493481900	13.459305830	1.522482707	12.896219040	4.616294937	5.28x10^-4	1.36x10^-2	-0.070042508
DHX57	6.721838789	5.959016183	5.263877750	4.656621546	5.055164642	5.627264167	7.211170750	8.173375739	6.830410167	6.968677333	6.714538750	7.405727758	1.670019570	6.382306964	4.616087499	5.28x10^-4	1.36x10^-2	-0.070407109
GNAO1	6.634836083	5.971846083	6.629517833	6.571081750	6.466785417	5.204950833	4.827097917	4.643346343	5.188719592	5.042868667	4.914896333	5.343226382	-1.253143795	5.619931103	-4.615528091	5.29x10^-4	1.36x10^-2	-0.071390374
AZGP1	15.443729170	15.758678330	15.779599160	15.831213330	15.970527130	15.106604600	10.595332820	11.555778510	13.948342870	11.757654020	13.246340830	15.065920000	-2.953497114	14.171643400	-4.615419137	5.29x10^-4	1.36x10^-2	-0.071581884
KIAA0922	4.454403294	5.468659917	5.215723833	5.192526000	5.318456408	4.765237750	3.895970302	4.278140500	4.463082206	3.661374333	3.737577000	3.881434917	-1.082904658	4.527715538	-4.615238487	5.29x10^-4	1.36x10^-2	-0.071899420
MASP1	7.692925250	7.608164750	8.098187083	7.809687930	7.788853583	7.811297531	2.896696917	4.137778988	4.857991194	5.802558333	7.256512859	5.872844000	-2.664122306	6.469458201	-4.615090876	5.29x10^-4	1.36x10^-2	-0.072158887
SERPINA4	11.474823800	11.373850000	11.741614170	12.273948330	11.666043530	10.926370830	6.846316000	9.380996000	9.198507917	10.435312250	9.006420894	10.259562080	-2.388255921	10.381980480	-4.612847628	5.31x10^-4	1.36x10^-2	-0.076102312
LOC100128288	10.986974170	9.211126663	10.615105920	12.197962500	12.581690260	11.623584170	6.497319500	8.363337245	8.204143750	9.476360692	8.733138750	9.191384380	-2.791793225	9.806843999	-4.608299084	5.35x10^-4	1.37x10^-2	-0.084100117
PLK4	4.551905250	4.191908000	3.607679583	3.232248110	3.253897083	4.415074929	7.054133000	7.598091000	6.458997500	5.864935671	4.332699917	5.628766083	2.280818369	5.015861344	4.607717280	5.36x10^-4	1.37x10^-2	-0.085123297
CHCHD10	12.685930180	13.267505000	12.971070000	13.313457500	13.033139170	12.816587340	10.429826500	10.519102010	11.521327440	11.903836670	12.558897500	11.591068110	-1.593938493	12.217645620	-4.606116111	5.38x10^-4	1.37x10^-2	-0.087939379
SEPT8	7.527617650	7.106006235	7.166389308	7.175050144	6.943660417	7.620376000	8.402445167	8.004806895	8.301139981	8.303121000	7.792457417	8.149388244	0.902376492	7.707704871	4.605962361	5.38x10^-4	1.37x10^-2	-0.088209805
NKX3-1	7.892069917	8.304624333	8.316590500	8.314247000	8.307112493	7.583908942	6.810618458	7.414152167	7.139455833	6.877215102	6.934292500	7.535740572	-1.001179759	7.619168985	-4.605942076	5.38x10^-4	1.37x10^-2	-0.088245483
SMPX	3.410160508	4.176605782	1.027909096	0.147304583	3.669056083	1.191093942	5.776601178	6.322681578	5.445828250	4.162563083	6.731547917	9.013393000	3.971747502	4.256228750	4.603048051	5.41x10^-4	1.38x10^-2	-0.093336245
ARPC5	12.787183720	13.207083010	12.648048700	12.333563550	12.689945720	13.247995870	14.363901880	13.669050820	13.846185150	13.422063050	13.874624660	14.109675100	1.061946682	13.349943440	4.602386110	5.41x10^-4	1.38x10^-2	-0.094500783
CCNE1	8.515504833	9.026146976	8.834408083	9.136149500	8.426911417	9.131433217	11.858195000	10.738034970	10.183774080	10.932380350	9.833480500	9.512718330	1.664671534	9.677428105	4.599141013	5.44x10^-4	1.38x10^-2	-0.100210568
MTHFS	14.238265240	15.125190830	14.784152500	14.814430000	14.481451670	14.319010830	11.973501010	12.279283130	14.155211330	13.202243570	13.485371670	13.021384170	-1.607584366	13.823291330	-4.598919241	5.45x10^-4	1.38x10^-2	-0.100600824
FAM100A	9.147713500	9.796295031	9.949895917	9.530010733	9.907561250	9.729240833	8.280845917	8.498082083	8.023225359	8.408035436	8.439649167	9.420560167	-1.165053189	9.094259616	-4.590554712	5.53x10^-4	1.40x10^-2	-0.115324402
ECM1	9.717968167	9.710468432	9.821881667	10.142456590	9.490667000	10.084899330	6.542211028	6.928693583	7.242171250	8.119005216	7.340633455	2.623973167	-3.361942248	8.147085740	-4.587998394	5.55x10^-4	1.41x10^-2	-0.119825817
SLC39A5	10.144309750	10.629531040	11.322137650	11.098049760	11.135560830	10.120087840	6.826504265	8.688533045	9.339398917	9.942022500	7.106825489	8.556834433	-2.331593037	9.575816293	-4.586583064	5.57x10^-4	1.41x10^-2	-0.122318407
tcag7.350	14.311375090	13.449994170	14.179014810	13.990608330	13.802787500	14.031627500	15.051587890	15.277075000	14.849058240	15.100002500	14.641216670	14.619884170	0.962236178	14.442019320	4.585905999	5.57x10^-4	1.41x10^-2	-0.123510898
IL1RAP	10.051103920	10.535444750	11.208310830	11.056169170	11.093442680	8.419254000	7.924708917	9.558868500	7.904647166	7.462083088	7.968567777	6.597803667	-2.491174372	9.148367038	-4.585862365	5.57x10^-4	1.41x10^-2	-0.123587750
LOC388885	13.276212790	12.178622140	13.764842010	13.404418690	13.426957320	13.462098550	14.231930020	14.844839170	14.333501670	14.319010830	14.367553020	14.868004330	1.241947923	13.873165880	4.585237039	5.58x10^-4	1.41x10^-2	-0.124689166
RNF152	6.785262667	7.870388500	8.006960250	7.859418000	6.739308500	6.029444949	3.281530408	4.449990964	5.116374417	5.857899917	5.249242000	5.895545750	-2.240033235	6.095113860	-4.583216970	5.60x10^-4	1.41x10^-2	-0.128247528
PPIAL4A	14.194217280	14.189631670	14.147619990	14.485637500	13.961530830	13.923926010	15.346731670	15.401967500	15.019111670	15.208272760	15.138525830	14.474709550	0.947792616	14.624323520	4.582031919	5.61x10^-4	1.41x10^-2	-0.130335230
UMODL1	7.675157917	7.721822027	8.892705250	8.945048375	9.285690822	8.410749500	5.839141333	6.422932017	6.778389583	7.058393833	7.406724917	7.420354428	-1.667539630	7.654759167	-4.581216753	5.62x10^-4	1.41x10^-2	-0.131771404
TOMM40L	9.491164875	10.587451580	8.373822191	8.986242000	9.131165833	10.078426170	11.426568330	11.334095370	10.569871830	11.149695000	12.782212480	11.056169170	1.945056588	10.413907070	4.579972975	5.63x10^-4	1.41x10^-2	-0.133962868
TCF19	4.987082374	3.735931833	1.027909096	0.147304583	2.210473740	4.320977333	6.646636417	6.563106833	5.974703189	6.911360795	4.830805583	6.610281396	3.517869209	4.497214431	4.579645594	5.64x10^-4	1.41x10^-2	-0.134539726
KNTC1	6.509894917	6.446507917	4.723256667	5.263877750	5.842935187	6.529449406	8.621576167	9.032766500	7.264246917	8.144568750	6.761860000	7.618814750	2.021318540	6.896646244	4.577605698	5.66x10^-4	1.41x10^-2	-0.138134383
LOC122589	13.795005830	12.948448330	13.518784640	13.382825830	13.715675800	13.405947190	14.633468340	14.932996510	14.316076670	14.779640000	14.431261670	13.923926010	1.041780260	13.982004730	4.577008068	5.66x10^-4	1.41x10^-2	-0.139187609
CALM2	14.997115000	14.788584040	15.582272500	15.253353330	14.577773920	15.296848330	16.306540830	16.004572890	16.320476140	16.222036140	15.987845030	15.686269170	1.005298845	15.585307280	4.576586235	5.67x10^-4	1.41x10^-2	-0.139931045
DNAJB11	12.356922500	12.515346670	11.883736090	11.925538330	12.148695830	12.046515830	12.975477500	13.340391670	13.877945000	13.601696670	14.139743810	12.540010000	1.266418232	12.779334990	4.569998286	5.73x10^-4	1.43x10^-2	-0.151544385
KIAA1614	8.503443928	7.368366833	9.826400167	9.473803077	10.786551670	9.804316833	5.770317705	6.586162343	7.192502917	5.969056174	7.196795417	7.954263250	-2.515630783	8.035998359	-4.569297209	5.74x10^-4	1.43x10^-2	-0.152780560
SERPINF2	10.046082830	9.044119083	8.322131530	9.208671250	9.779269417	9.198507917	6.423733167	7.809687930	6.587932917	7.800650067	6.580429000	8.682442854	-1.952317683	8.290304830	-4.569023881	5.74x10^-4	1.43x10^-2	-0.153262522
ACTL6A	11.401937400	11.344192940	11.279394520	11.388542690	11.014136150	11.453928590	12.757717580	13.402731060	12.222348160	12.264927980	12.061960930	12.047671240	1.145870776	11.886624100	4.567148972	5.76x10^-4	1.43x10^-2	-0.156568807
RAB17	8.755874083	9.276835873	10.425965870	10.282074830	9.858736000	8.584638626	6.401208522	5.959485826	6.734070333	8.118015333	7.564397000	8.688138047	-2.286468371	8.387453362	-4.565052374	5.78x10^-4	1.43x10^-2	-0.160266522
GYS2	8.775744250	8.564567025	10.531579010	9.622572667	8.769854583	7.990497614	2.873191750	2.799941179	6.950348000	5.193057833	4.310502006	8.196878917	-3.988482578	7.048227903	-4.564983272	5.78x10^-4	1.43x10^-2	-0.160388404
DPT	12.832424170	12.288113330	11.006279170	11.898555830	10.705732430	13.404418690	9.434897621	7.671139524	11.334095370	9.179571583	9.480325500	8.552213917	-2.747213350	10.648980590	-4.559976647	5.84x10^-4	1.44x10^-2	-0.169220616
DEPDC7	12.260540840	12.697113330	12.493688020	12.987353330	13.249024170	11.938945440	8.305721855	9.523423750	10.345714100	10.968680830	10.117220380	12.097187500	-2.378119453	11.415384460	-4.559393423	5.84x10^-4	1.44x10^-2	-0.170249678
ESRRG	6.278335083	6.541168667	6.968187828	6.188272000	6.606804450	6.249102583	5.423384042	5.337931917	5.318456408	5.209365621	5.180269875	6.155637089	-1.034470943	5.954742964	-4.557055167	5.87x10^-4	1.44x10^-2	-0.174375790
TPD52L2	5.921266833	5.215131417	5.549290219	5.768544083	4.358846000	4.547975438	7.331608500	7.840010167	6.906603000	7.541425127	5.670672083	6.841795833	1.795176787	6.124430725	4.557033482	5.87x10^-4	1.44x10^-2	-0.174414059
CXCL14	12.765022500	13.430131470	12.484337500	12.947293330	13.885872020	13.169020990	12.136832500	6.650981672	9.848750250	9.735882000	10.559621420	6.432742833	-3.886144524	11.170540710	-4.555227330	5.89x10^-4	1.45x10^-2	-0.177601663
MBL2	13.170195830	13.846185150	13.808483920	14.215357500	13.879809500	14.606424170	8.364040748	12.520586110	11.971912810	10.442242330	12.518738330	10.296988670	-2.901991178	12.470080420	-4.553896950	5.90x10^-4	1.45x10^-2	-0.179949843
LOC729313	13.959963680	13.982751670	13.906720830	14.206379170	13.674156960	13.608441670	15.138525830	15.270820000	14.872041500	14.975404680	14.910574170	14.170062500	0.999835785	14.389653550	4.549976992	5.94x10^-4	1.46x10^-2	-0.186869964
SAA4	15.942806190	16.685385380	16.566785000	16.725737090	16.131971670	15.443729170	10.587113750	10.147454000	15.933068330	13.494535000	13.297115000	11.337141670	-3.783331123	14.357736850	-4.548339447	5.96x10^-4	1.46x10^-2	-0.189761352
LOC131691	13.195712560	13.109287500	13.159667400	13.413012500	12.925451670	12.829497360	14.134694170	14.530059470	14.051256350	14.087482500	14.235494170	13.424033700	0.971731895	13.591304110	4.545919505	5.98x10^-4	1.46x10^-2	-0.194034786
TSPAN9	8.241268617	8.631556333	7.984347917	8.197778167	8.055778583	7.858386356	6.493324083	7.359782250	7.387058167	7.021947105	7.460435083	7.194988941	-1.008596724	7.657220967	-4.544654642	6.00x10^-4	1.47x10^-2	-0.196268713
C5orf46	6.469685009	6.393787667	6.946237000	7.113273250	7.442764121	5.842449250	7.577868667	9.146904083	8.445010083	8.719084363	8.799278500	7.415648333	1.649266289	7.525999194	4.544231801	6.00x10^-4	1.47x10^-2	-0.197015552
SPP1	12.909959310	10.896669170	9.545228000	10.685742240	10.203288830	12.560503120	16.872188330	14.311375090	14.274462850	16.517125060	13.277850830	12.931893210	3.563917449	12.915523840	4.543433427	6.01x10^-4	1.47x10^-2	-0.198425732
BARD1	7.862656800	7.810751091	6.196772250	6.113472833	6.266062787	7.284618811	9.425700408	9.206582667	8.208828998	8.769854583	7.944501642	8.725962692	1.791182736	7.817980464	4.541019158	6.04x10^-4	1.47x10^-2	-0.202690544
LOC646672	14.581050000	13.781017470	14.683255000	14.392177100	14.179014810	14.574587500	15.454297130	15.745724170	15.257157500	15.652472960	14.954510830	15.183721670	1.009463728	14.869915510	4.539986407	6.05x10^-4	1.47x10^-2	-0.204515111
MYO10	9.723972419	8.787164917	8.226370333	8.307112493	7.996649917	9.271064633	7.789298667	7.004619833	7.189757250	7.291410556	7.577254583	7.101637600	-1.393059370	8.022192767	-4.537654103	6.07x10^-4	1.47x10^-2	-0.208636066
HIST4H4	3.734026026	4.149125582	5.001934083	5.272606667	5.061797083	4.592120417	0.974550163	1.281930654	-0.308838848	2.438094167	3.782206000	3.078301773	-2.760894325	3.254821147	-4.536891877	6.08x10^-4	1.47x10^-2	-0.209982986
GRN	14.324220830	14.304366290	13.961530830	13.535320830	14.097455000	14.455752890	15.523413520	15.006209280	15.120249980	15.561358540	14.708300470	14.968326030	1.034868523	14.630542040	4.536851074	6.08x10^-4	1.47x10^-2	-0.210055089
NEU1	10.793521670	11.050695830	10.714058400	10.571832580	10.815120830	11.079104260	11.450535830	11.392985830	11.652920690	11.927367340	12.293116670	12.206611670	0.983200741	11.328989300	4.536027969	6.09x10^-4	1.47x10^-2	-0.211509666
POGK	9.212188344	8.945763583	8.439649167	8.571222167	8.775253083	8.601247101	10.864506670	10.144309750	9.662499750	9.789900728	9.460537722	9.683325083	1.176626043	9.345866929	4.531135275	6.14x10^-4	1.49x10^-2	-0.220157596
GPC6	10.893384170	10.799982500	11.172060830	11.109114170	11.260880000	11.044163330	9.514532500	10.624073640	9.869732667	10.044079750	9.471324189	8.527221083	-1.371436861	10.360879070	-4.528393038	6.17x10^-4	1.49x10^-2	-0.225005777
TRMT6	8.514092500	8.784241798	7.927731030	8.418272083	7.919403621	8.414023398	10.136790200	9.892897036	9.403322875	9.203572158	8.899682537	9.385487830	1.157331367	8.908293089	4.527917626	6.18x10^-4	1.49x10^-2	-0.225846379
TAF6	10.580243500	10.362660500	10.353328920	10.275161670	10.570366810	10.490063670	11.818049170	11.279394520	11.282491670	11.079104260	11.829915470	10.957193330	0.935720560	10.906497790	4.527485972	6.18x10^-4	1.49x10^-2	-0.226609633
FANCG	9.287331921	9.026423000	8.427364750	8.168462386	9.041010938	9.457473808	11.143021670	11.421591740	10.210720500	9.536347418	10.141154400	10.356684420	1.566908889	9.684798912	4.523974579	6.22x10^-4	1.50x10^-2	-0.232819314
CDK7	10.273912000	10.078426170	11.035820250	10.512419200	10.433276830	10.451795650	11.745247670	11.450535830	10.967528330	11.964615000	11.319667500	11.522184170	1.030688069	10.979619050	4.522960709	6.24x10^-4	1.50x10^-2	-0.234612549
LOXL2	8.636044159	7.690807218	7.398422000	7.563196086	7.645837500	8.213976583	9.422954583	10.963163590	8.676842417	9.867829333	9.416989845	8.917812667	1.686218148	8.701156332	4.520189990	6.27x10^-4	1.50x10^-2	-0.239513738
SLC25A42	8.011078669	8.030467083	8.919933667	8.429053602	8.685665750	8.055457583	5.940198644	6.596293833	7.636917972	6.985709833	6.836254018	7.640306000	-1.415996009	7.647278054	-4.518340952	6.29x10^-4	1.51x10^-2	-0.242785041
C18orf18	9.502257196	9.887508167	9.775584750	9.871005551	9.834508167	9.399212480	7.565381667	9.444445891	7.063776756	7.892457750	7.754881449	8.796428833	-1.625450661	8.898954055	-4.518176836	6.29x10^-4	1.51x10^-2	-0.243075413
MCM5	9.413860599	9.635354750	8.795882083	9.043142558	9.630815333	9.975370743	10.176404150	10.620686170	10.332770670	10.557207420	10.319826500	10.781754170	1.049037167	9.940256261	4.517057458	6.30x10^-4	1.51x10^-2	-0.245056024
DPYS	14.260457500	14.954510830	14.526078330	14.560651670	14.514578330	14.716710830	9.142744333	11.438681670	13.016705830	11.058189830	11.990605830	13.906720830	-2.829889861	13.173886320	-4.515141316	6.32x10^-4	1.51x10^-2	-0.248446753
LOC728126	13.913712930	12.874119910	13.767053330	13.585170830	13.107388730	13.376485320	15.212722250	15.296848330	15.172405830	15.125190830	14.606424170	13.644130050	1.405631734	14.140137710	4.511346331	6.37x10^-4	1.52x10^-2	-0.255163470
BMPER	5.545185583	5.456197230	5.895089620	5.162333583	5.340659583	5.586155349	2.891464297	3.333679886	0.249255292	3.735931833	4.179314833	3.752400696	-2.473929019	4.260638982	-4.509904272	6.38x10^-4	1.52x10^-2	-0.257716197
CYP4F3	10.733034170	10.569400850	11.088970000	11.289276670	11.305039770	10.129704140	6.365799500	7.576887347	9.663788832	8.328140667	8.721830352	9.950266750	-2.418118691	9.643511587	-4.509897420	6.38x10^-4	1.52x10^-2	-0.257728328
DMGDH	13.555915000	13.397209860	13.177578540	13.526790000	13.404418690	13.075342630	7.762001304	8.465097167	11.092149170	9.832881667	9.734406167	13.291525830	-3.326532236	11.692943000	-4.508263791	6.40x10^-4	1.52x10^-2	-0.260620465
LOC120364	10.355790460	9.856350333	10.422920830	9.856350333	9.878044833	10.203288830	11.017515660	11.967302500	11.366134170	11.171627500	10.581997580	11.068718330	1.100091687	10.645503450	4.507516371	6.41x10^-4	1.52x10^-2	-0.261943782
SWAP70	8.102687705	7.902300496	7.551302833	7.245140583	6.826504265	8.032469862	9.454443604	8.701499517	8.853759214	8.632097552	8.681948839	8.525034432	1.198062902	8.209099075	4.507499672	6.41x10^-4	1.52x10^-2	-0.261973350
SLC16A11	10.722772500	10.591601480	12.131972500	12.157052080	12.276502740	11.346643330	7.715870373	8.632097552	9.896905583	9.665962594	9.112152000	10.756118330	-2.241239701	10.417137590	-4.504954222	6.44x10^-4	1.52x10^-2	-0.266480593
SPAG5	9.912487442	10.618531060	9.408537401	9.823208583	9.994291250	9.978763667	11.543866670	11.821330830	11.196456300	11.019342970	10.737594170	10.623446580	1.201036353	10.556488080	4.504375604	6.45x10^-4	1.52x10^-2	-0.267505260
SFRP1	9.248752500	9.283866583	8.996039000	10.309544160	8.621043348	10.222801440	7.901306833	6.333260696	7.800875358	8.327785768	8.302796961	7.004988586	-1.835172137	8.529421769	-4.503655438	6.45x10^-4	1.52x10^-2	-0.268780647
LOC388122	13.652360830	12.575615000	13.799151670	13.463119170	13.027954170	13.326022900	14.823410760	15.161145000	15.065920000	14.979745000	14.458384170	13.611982500	1.376060614	13.995400930	4.498212550	6.52x10^-4	1.54x10^-2	-0.278421731
PPARGC1A	10.883760830	12.273948330	10.461510670	11.672987500	11.509405830	11.527367500	6.531312750	8.563132000	9.205441333	7.336867674	9.882160707	10.396248790	-2.735636235	10.020345330	-4.494973160	6.56x10^-4	1.54x10^-2	-0.284161342
CXCL2	12.544230000	12.990584170	13.623502740	12.886135000	13.270845830	10.903188790	9.343272060	10.974129170	11.289276670	7.999187591	10.880176770	8.406865583	-2.887596449	11.259282860	-4.494757427	6.56x10^-4	1.54x10^-2	-0.284543625
LOC643997	13.523492500	13.468756670	13.590170070	13.854736670	13.520898330	13.392305180	14.441031940	14.812475000	14.302301130	14.358253330	14.645585830	13.976558710	0.864307755	13.990547110	4.494680483	6.56x10^-4	1.54x10^-2	-0.284679973
COPS5	13.048037860	12.635072500	13.894499170	13.480003970	12.976678310	13.000430120	13.986053330	14.170062500	14.187874170	14.499251670	14.159980200	14.201233170	1.028288851	13.686598080	4.494071526	6.57x10^-4	1.54x10^-2	-0.285759088
MEFV	9.182049921	9.146904083	9.488118868	9.386885500	10.444586830	9.440376946	7.566982980	7.761141333	7.627300250	7.620376000	9.177495441	8.452040833	-1.480597552	8.774521582	-4.493315476	6.58x10^-4	1.54x10^-2	-0.287098924
USP39	12.659589170	12.433825830	12.093704520	12.272952730	12.250400970	12.309672500	13.539892280	13.598280000	12.957574170	13.315163280	13.175849770	12.827869430	0.899080536	12.786231220	4.492470940	6.59x10^-4	1.54x10^-2	-0.288595648
HSPA14	9.416989845	9.562465750	9.815778062	9.825984750	9.145348917	9.365803667	10.313117000	10.718725840	10.268332510	10.677945780	10.046082830	10.602630000	0.915743830	9.979933747	4.492335874	6.59x10^-4	1.54x10^-2	-0.288835025
DHRS4	10.885150980	11.065059030	11.848465000	11.511562530	11.656841670	10.666820000	9.197790583	10.027379580	10.295042340	9.748854528	9.321102917	10.702830320	-1.390149821	10.577241620	-4.491752278	6.59x10^-4	1.54x10^-2	-0.289869356
BDH1	10.763605490	10.306659920	11.627165500	11.250166740	11.210368330	10.595332820	6.739308500	8.474514041	9.330179500	9.143098167	8.345374860	10.334992590	-2.230971855	9.843397204	-4.485827527	6.66x10^-4	1.56x10^-2	-0.300372252
C3orf26	11.276699960	11.368491670	11.430262500	11.682848730	11.323622500	11.324140000	12.201224170	13.413012500	12.187305980	12.244111670	12.352559500	12.330236000	1.053730743	11.927876260	4.485230820	6.67x10^-4	1.56x10^-2	-0.301430266
LOC100131419	5.195151000	5.090868750	5.882160000	5.930499167	6.802513328	5.493822417	-0.012576120	3.310903648	2.996653000	3.242542250	3.396380050	4.616875667	-2.807372695	4.328816096	-4.482552674	6.70x10^-4	1.56x10^-2	-0.306179358
AVPI1	10.991805430	11.644214170	11.603189170	10.768816670	11.096437700	11.544857500	10.116122010	10.050540580	10.096724330	9.891939803	10.292261170	10.853000540	-1.058122034	10.745825760	-4.482153139	6.71x10^-4	1.56x10^-2	-0.306887914
LOC441016	6.458627250	6.706591333	7.003042417	7.000899897	6.334237667	6.630504167	7.716345417	7.802800667	7.792041111	8.543570000	7.604043034	7.177826833	1.083787389	7.230877483	4.478960556	6.75x10^-4	1.57x10^-2	-0.312550462
MMAA	10.021420830	10.641569060	10.865367500	10.801247350	10.006983100	9.960437577	8.715569176	8.692847183	9.853030708	8.779939510	8.143555333	9.588234983	-1.420641421	9.672516859	-4.477008215	6.77x10^-4	1.57x10^-2	-0.316013818
SULT1A4	13.767053330	13.277850830	13.652360830	14.491667090	14.116853330	13.467075000	10.926370830	10.820455610	11.269313290	13.757157500	11.626167030	12.147489950	-2.037651036	12.776651220	-4.476599414	6.78x10^-4	1.57x10^-2	-0.316739066
MRPL9	12.044384170	11.945180260	11.926897180	11.803952770	11.959908890	12.095709020	13.333224170	13.045983330	12.389267030	12.876845830	12.508350000	13.044241670	0.903646624	12.414495360	4.476339386	6.78x10^-4	1.57x10^-2	-0.317200387
KCNN3	7.536417667	7.036663970	8.643068167	10.129340450	10.413020060	9.371393500	6.495569333	5.979092750	5.338635917	7.110386500	5.862880636	6.877981750	-2.577559488	7.566204225	-4.475364121	6.79x10^-4	1.57x10^-2	-0.318930697
AKAP2	9.936230183	9.590373278	11.581874190	11.466433550	9.679670505	9.674133723	7.468422090	7.221294667	9.552660912	8.651859909	6.399209618	7.836001442	-2.466544465	9.088180339	-4.474890336	6.80x10^-4	1.57x10^-2	-0.319771322
CBLL1	7.314562000	7.262600667	7.222562679	6.964244997	6.958737492	7.319656617	7.671946246	8.024304898	7.995560490	7.835634250	8.018202523	8.133827066	0.772851837	7.560153327	4.473765802	6.81x10^-4	1.57x10^-2	-0.321766658
BXDC2	10.537485670	10.624073640	11.030931670	10.983562500	10.034294060	10.394556540	12.038639170	12.384611670	11.465775830	11.706794800	11.212258330	11.603189170	1.134394148	11.168014420	4.472289634	6.83x10^-4	1.57x10^-2	-0.324386141
LOC493754	13.291525830	12.961107020	13.546614700	13.300230000	13.162710830	13.476430830	13.776764350	14.796785240	14.081664770	14.735289170	13.970890000	14.566435000	1.031534884	13.805537310	4.470681820	6.85x10^-4	1.58x10^-2	-0.327239514
PFDN4	10.503895580	10.017059800	10.811364690	10.356684420	10.040881020	10.551179670	11.658159170	11.516974170	11.444417500	11.922232500	11.015974570	10.947059170	1.037291983	10.898823520	4.468489739	6.87x10^-4	1.58x10^-2	-0.331130251
LOC100131532	4.971579083	4.341460219	4.926454250	4.048764284	4.547975438	3.121066667	2.590116167	2.659345917	2.799045000	2.989496436	1.374602583	0.132998375	-2.235282577	3.208575368	-4.468200636	6.88x10^-4	1.58x10^-2	-0.331643422
MEX3A	7.442029417	6.114650750	5.637306318	7.125778667	6.530160862	5.994733583	10.434256170	10.719867530	7.131764167	9.991645500	8.730155857	7.990207000	2.692206104	7.820212985	4.467120778	6.89x10^-4	1.58x10^-2	-0.333560305
C11orf80	0.103028333	0.177961250	1.027909096	0.147304583	-2.497450795	0.015330233	4.494962115	4.891940663	3.312709721	5.817941583	3.256991044	0.132998375	3.822243467	1.740135517	4.464121484	6.93x10^-4	1.59x10^-2	-0.338885118
ABCA8	8.531579875	8.347034320	9.194153940	9.254962661	8.818735515	8.565151042	4.947772051	6.617568300	7.513449457	5.055164642	5.731150914	8.363056522	-2.413909244	7.578314937	-4.459328618	6.99x10^-4	1.60x10^-2	-0.347396274
RRM1	11.257425750	11.046309170	11.455544170	11.599694280	11.390447540	11.626167030	12.730006670	13.170195830	12.611085000	12.757717580	11.706794800	12.161110000	1.126886993	11.959374820	4.457784527	7.01x10^-4	1.60x10^-2	-0.350138818
CXCL12	12.791076670	12.253361770	11.981231690	12.165640830	11.600547890	13.487657500	9.557091363	10.381547580	11.086870160	10.758098170	9.270604595	7.055301122	-2.695000560	11.032419110	-4.457024412	7.02x10^-4	1.60x10^-2	-0.351488999
PSAT1	12.407045000	12.230274700	13.042681450	13.120153640	12.969918760	12.075405000	9.502676500	11.473897500	11.331673190	10.625776830	11.950428330	10.664184640	-1.716140258	11.782842960	-4.456425076	7.03x10^-4	1.60x10^-2	-0.352553634
C12orf4	8.964635750	9.085515681	9.209703960	8.446771332	8.533750544	8.909832167	10.651616850	10.255111170	9.900202583	9.997145667	9.326865917	9.695886083	1.112769805	9.414753141	4.455211169	7.04x10^-4	1.60x10^-2	-0.354710097
SPRYD4	11.714128330	12.236897500	11.861364370	11.981231690	12.269798040	11.656841670	8.899682537	11.232300830	10.675574170	9.874734583	10.282905920	11.082013330	-1.612175039	11.147289410	-4.454671464	7.05x10^-4	1.60x10^-2	-0.355668915
TP53BP2	9.727287917	9.791283383	9.609633917	9.522406022	9.155918333	10.095232310	11.564150830	10.817069170	10.650385460	11.091157500	9.950266750	11.225166210	1.232739006	10.266663150	4.454569188	7.05x10^-4	1.60x10^-2	-0.355850619
ARFGEF2	6.973297071	7.399689219	7.043130281	6.912604850	7.072967561	6.905991113	7.587886388	7.934387783	7.782654765	7.794646275	7.830650284	8.234648223	0.809532270	7.456046151	4.451727457	7.08x10^-4	1.61x10^-2	-0.360899704
COMT	11.818049170	12.679616670	12.849617890	12.660852260	12.620114150	11.369951010	9.983000030	10.139623510	11.394124600	11.639483950	10.836945260	10.241484670	-1.627256521	11.519405260	-4.450417386	7.10x10^-4	1.61x10^-2	-0.363227695
RPSA	14.619884170	13.816293330	13.854736670	13.926490830	13.889614580	14.185225000	15.507993950	15.665416460	15.411672500	15.303131180	15.454297130	14.185225000	1.205915272	14.651665070	4.450207896	7.10x10^-4	1.61x10^-2	-0.363599976
SLC22A13	5.643173917	5.883678071	7.154469726	6.903857167	6.312865500	5.712994358	3.577637730	4.018537944	5.454857750	5.049898603	4.796167397	4.739236583	-1.662450455	5.437281229	-4.449882609	7.11x10^-4	1.61x10^-2	-0.364178048
SRI	11.195620830	10.456400830	11.111191670	10.902774170	10.526609000	11.214759970	11.957932500	12.441023330	12.948448330	11.261319890	12.445502500	11.979184170	1.271009043	11.536730600	4.448268549	7.13x10^-4	1.61x10^-2	-0.367046591
XPO1	11.006948160	10.460361500	10.799709170	10.516462000	10.630624170	11.248167860	12.162106670	11.995276350	11.435130430	11.492320310	11.482004680	11.975282330	0.979974649	11.267032800	4.447516980	7.14x10^-4	1.61x10^-2	-0.368382394
CHST4	9.412496417	11.432491670	8.732083167	10.296499200	9.246625667	10.161967330	8.743502083	6.543615000	7.886934000	7.921745275	7.883094333	5.873368083	-2.404984111	8.677868518	-4.446105237	7.16x10^-4	1.61x10^-2	-0.370891732
C3orf16	7.320767826	7.957022632	8.816478918	9.439173167	8.471211971	8.561947083	4.453619917	5.002387667	7.142564250	6.410929333	7.022631250	6.825641115	-2.284804677	7.285364594	-4.445500558	7.16x10^-4	1.61x10^-2	-0.371966603
FAM64A	5.502748500	5.112397250	5.404157833	5.154672667	5.901940758	5.510820284	9.312707083	9.990494333	7.024775583	8.970151917	6.835475583	6.252166000	2.633172201	6.747708983	4.445089544	7.17x10^-4	1.61x10^-2	-0.372697240
LYZ	7.781440583	8.151977360	7.465833218	5.554586500	9.450152667	10.636185830	11.756670000	12.420074170	9.256970250	11.818049170	13.792820480	13.042681450	3.841181559	10.093953470	4.444211353	7.18x10^-4	1.61x10^-2	-0.374258416
NUDT1	10.371172380	10.131928280	10.060988420	9.766140930	9.712507750	10.501833580	12.873025000	12.245893330	11.872874170	10.896669170	11.518347050	10.659926670	1.587027339	10.884275560	4.443601038	7.19x10^-4	1.61x10^-2	-0.375343434
LOC644384	14.656848080	13.904950360	14.705024520	14.448685000	14.020973330	14.627635830	15.512782500	15.953466670	15.859337500	15.495309170	14.932996510	15.114873090	1.084108050	14.936073550	4.436239214	7.28x10^-4	1.63x10^-2	-0.388434568
PROSC	10.669067500	11.014136150	10.298625080	10.305248500	10.857945830	10.169144100	9.313154122	8.668632500	8.909832167	8.660895445	10.064654490	9.854156250	-1.307140366	9.898791011	-4.435498061	7.29x10^-4	1.63x10^-2	-0.389752856
PUS7L	7.016379167	6.915215490	7.466535916	7.220497750	6.845501500	7.387565307	8.248950942	8.317723667	7.835121083	7.874105842	7.718900250	8.588618500	0.955287526	7.619592951	4.434945759	7.30x10^-4	1.63x10^-2	-0.390735274
GINS2	6.501140167	7.908759269	7.467002250	7.390566417	7.799253571	9.070258250	9.568335185	10.462392940	9.178656918	9.270395417	8.715053250	9.623791059	1.780274142	8.579633725	4.432942865	7.33x10^-4	1.64x10^-2	-0.394298246
LOC442270	14.812475000	13.667792500	14.950132500	14.723737500	14.501587500	14.594578780	15.826166820	15.775306670	15.234496070	15.853974170	15.380491420	15.626994170	1.074520921	15.078977760	4.431510192	7.35x10^-4	1.64x10^-2	-0.396847120
LOC120376	5.736293167	1.948145493	1.027909096	2.333289250	-0.922547528	3.769578714	7.899269417	6.686324700	7.041963574	7.316164090	6.112383500	4.341868443	4.250884255	4.440886826	4.431251943	7.35x10^-4	1.64x10^-2	-0.397306596
KIF2C	8.037161866	8.637998509	8.777781667	9.261389167	9.125932583	8.717600500	11.424480000	10.803140200	9.616307083	10.601587000	9.395860583	10.102561310	1.564345314	9.541816706	4.429143856	7.38x10^-4	1.64x10^-2	-0.401057575
GINS3	6.961504333	7.115437833	7.448027409	7.051049083	7.285104917	8.057784989	8.769854583	8.824270250	8.702654667	7.948716500	7.926196250	8.593711583	1.141082545	7.890359366	4.427268990	7.40x10^-4	1.65x10^-2	-0.404393993
COL4A2	13.201045000	12.212616300	11.059580000	11.079104260	10.862111670	12.900734170	14.656848080	14.302301130	13.898801380	14.489308080	14.084845830	12.641023330	2.126322740	12.949026600	4.419943004	7.50x10^-4	1.67x10^-2	-0.417434682
GCHFR	11.685230760	11.453250000	12.413379170	12.613754570	12.158845150	11.101640400	8.827694833	10.122664250	11.150551110	10.788826210	9.841060417	10.264102670	-1.738533425	11.035083290	-4.417912703	7.53x10^-4	1.67x10^-2	-0.421049786
GNMT	12.200133750	12.168602500	14.321745000	13.561224170	13.291525830	11.897341160	5.807404417	7.259094325	11.030322030	7.694619667	7.742165323	12.193851670	-4.285519164	10.764002490	-4.417616523	7.53x10^-4	1.67x10^-2	-0.421577195
LOC391655	15.899503330	15.385895830	15.792319720	15.660487870	15.407817500	16.131971670	16.793626500	16.793626500	16.443365830	17.237363330	16.315169170	16.517125060	0.970380080	16.198189360	4.417556111	7.53x10^-4	1.67x10^-2	-0.421684772
TUBA3D	9.615736167	9.697278347	9.462880917	9.137700332	9.539316333	9.555533019	10.348612830	10.388713780	10.014278850	10.836945260	10.337029250	10.202857200	0.853332009	9.928073524	4.412533904	7.60x10^-4	1.68x10^-2	-0.430629341
E2F5	5.841078118	6.232466015	6.138927088	6.411563874	6.325020696	5.435338750	8.619074333	8.732983417	7.542154667	7.342246205	7.164156785	6.631021333	1.607873700	6.868002607	4.412024939	7.61x10^-4	1.68x10^-2	-0.431535966
C3orf63	9.566505843	9.066290667	8.729114417	8.884438078	8.930417499	9.420560167	10.377871950	10.113518330	10.239995710	9.662109917	10.114175170	9.788803583	0.949857999	9.574483445	4.405827731	7.70x10^-4	1.70x10^-2	-0.442577380
PALM2	4.719047564	5.817194592	5.490134591	4.269193667	4.170101583	4.407170583	0.067004467	-0.197128454	2.320960708	-0.888781808	2.563920500	4.270863717	-3.456000575	3.084140142	-4.404797788	7.71x10^-4	1.70x10^-2	-0.444412813
TPM3	10.981247270	11.163702840	10.898039490	10.525155040	10.587451580	11.124321760	12.703381950	12.168602500	11.571007540	12.097187500	11.417810090	11.829915470	1.084664510	11.422318590	4.403740448	7.72x10^-4	1.70x10^-2	-0.446297190
TRPM8	9.349522250	10.523593440	11.122162340	11.666043530	11.586559170	10.117706770	6.813570161	6.482478250	6.382943750	8.876491000	9.589855417	9.135123000	-2.847520988	9.303837424	-4.403372953	7.73x10^-4	1.70x10^-2	-0.446952163
HSPA4	12.845187500	13.092220830	12.252520500	12.920574680	12.441023330	12.888711670	13.281270490	13.702353330	13.588918810	13.733457500	14.185225000	13.702353330	0.958889993	13.219484750	4.402239432	7.74x10^-4	1.70x10^-2	-0.448972489
TTTY2	5.474950263	5.677879072	5.877315839	5.291762833	6.797214735	6.079965430	4.593754000	4.402267833	4.253393417	4.268670683	5.081015500	5.109564083	-1.248403776	5.242312807	-4.398141161	7.80x10^-4	1.71x10^-2	-0.456278195
RPL27	16.413585700	15.942806190	16.286462730	16.024685500	15.942806190	16.119017200	17.189527180	17.189527180	17.147314260	16.566785000	16.725737090	16.963900180	0.842237897	16.542679530	4.397392134	7.81x10^-4	1.71x10^-2	-0.457613632
LOC100192204	14.269501030	14.260457500	14.187874170	14.408374890	14.170062500	14.009343360	15.343827500	15.262015830	15.078143820	15.253353330	15.360601210	14.411908330	0.900706097	14.667955290	4.394213866	7.86x10^-4	1.72x10^-2	-0.463280830
CYP4F2	10.056224510	10.481427200	11.175625830	11.054457150	11.440949100	10.259014770	6.910993975	7.646263583	8.794302750	9.030142815	9.588234983	9.787882083	-2.118313061	9.685459895	-4.393095386	7.87x10^-4	1.72x10^-2	-0.465275463
CD81	14.538111440	13.833177500	14.059452830	14.460725830	14.489308080	14.045013330	13.003660530	12.887319170	13.044241670	13.778149080	12.075405000	13.352826670	-1.214031149	13.630615930	-4.392279928	7.89x10^-4	1.72x10^-2	-0.466729791
SPSB2	7.872617583	7.714632558	7.304518091	7.464663037	8.640790343	8.861549000	10.211091670	8.735694296	8.873476417	9.599919167	9.788438583	9.749913608	1.516627188	8.734775362	4.387729499	7.95x10^-4	1.73x10^-2	-0.474846567
AGMAT	11.537777810	11.752562330	11.770286560	11.730918730	11.521327440	11.420065800	9.515060336	10.740157580	9.774341413	11.249100320	10.194996320	10.712048710	-1.257872330	10.993220280	-4.386465395	7.97x10^-4	1.74x10^-2	-0.477101797
RPLP0	15.740825080	14.836946130	15.538614170	15.266183330	15.466083040	15.217986180	16.809265000	16.694060830	16.413585700	17.147314260	15.979025980	15.875747740	1.142060262	15.915469790	4.385195121	7.99x10^-4	1.74x10^-2	-0.479368208
SLC6A12	10.310002070	9.830146923	9.782317917	10.615105920	10.608590450	9.931624917	6.186111167	7.731671828	8.249354262	7.980707650	8.099818000	9.992593333	-2.139588659	9.109837036	-4.384145063	8.00x10^-4	1.74x10^-2	-0.481241842
LOC648294	15.262015830	14.633468340	15.212722250	15.203157500	14.788584040	15.501115000	16.259149250	16.736707170	16.488785630	16.148221670	15.512782500	15.936870830	1.080242347	15.640298330	4.383225659	8.02x10^-4	1.74x10^-2	-0.482882449
ACO1	13.218696160	13.149582530	12.798371140	13.437023640	13.197863670	12.678063130	11.143756710	11.385790050	12.098237490	11.015166510	12.367007540	12.543182810	-1.321076526	12.419395120	-4.382620114	8.02x10^-4	1.74x10^-2	-0.483963045
CCDC110	3.705596202	0.177961250	1.027909096	0.147304583	0.257770217	3.535784492	5.363558000	4.647210133	6.116747333	2.750052167	4.521340417	5.707487820	3.375678338	3.163226809	4.382244328	8.03x10^-4	1.74x10^-2	-0.484633658
IL24	5.701710182	5.809297270	7.384275324	7.115437833	7.027914583	5.596025864	2.640030000	4.134928523	4.233695750	4.545885000	5.185623750	5.247400994	-2.107849507	5.385185423	-4.381902001	8.03x10^-4	1.74x10^-2	-0.485244573
CETP	8.641081883	8.936995836	10.529568100	7.908355538	8.824666250	8.685331417	4.892636500	6.589967583	8.000865079	6.305947035	6.247745916	7.551888954	-2.322824660	7.759587508	-4.380005681	8.06x10^-4	1.74x10^-2	-0.488628968
CDC25A	4.325531917	5.145357917	4.399166833	5.337931917	5.221504917	6.006631000	6.983252833	7.497875083	6.401835727	6.396056490	6.138594917	6.011265667	1.498792703	5.822083768	4.377530155	8.10x10^-4	1.75x10^-2	-0.493047663
ADH6	10.736179820	10.364925640	12.143516860	12.031745040	11.673787320	10.483094880	5.996321716	9.614479791	8.344938763	9.057091497	7.045227025	10.068403400	-2.884464559	9.796642646	-4.376925058	8.11x10^-4	1.75x10^-2	-0.494127833
PADI2	5.930499167	5.968402917	6.708039833	6.614666417	7.734681698	7.164859667	4.616875667	4.864954417	4.866254917	4.841900417	5.627809583	5.993205008	-1.551691615	5.911012475	-4.372234808	8.18x10^-4	1.76x10^-2	-0.502501817
SLC7A2	5.728262792	6.369889833	6.134353500	6.662116083	6.204426667	5.281976583	3.592795417	5.051453833	3.255777917	5.209887170	4.567486167	4.850710500	-1.642152409	5.242428038	-4.371761905	8.18x10^-4	1.76x10^-2	-0.503346270
DAK	8.450962870	9.009111417	9.891939803	9.884209347	9.476813878	8.124143167	6.301432500	5.960369417	7.768549750	8.603025250	7.098955917	6.750563294	-2.059047392	8.110006384	-4.369926799	8.21x10^-4	1.77x10^-2	-0.506623408
PTGR1	13.018853330	13.408902500	13.897138330	14.065010000	13.837695830	12.503285000	11.105361810	12.348023330	12.006300900	11.751176670	12.000415830	12.754918040	-1.460781402	12.724756800	-4.369166828	8.22x10^-4	1.77x10^-2	-0.507980674
NCRNA00166	8.394840833	8.279757776	8.798816083	8.882549250	9.935907000	9.173978601	7.631076463	7.121759628	6.710383968	6.634836083	7.380493417	8.476861000	-1.585073164	8.118438342	-4.367304374	8.25x10^-4	1.77x10^-2	-0.511307170
LOC728380	15.893150000	14.868004330	16.271357500	15.617531000	15.360601210	15.640277500	16.985042440	16.926862500	16.950034470	17.297777550	16.413585700	16.211703330	1.189014077	16.202993960	4.366530106	8.26x10^-4	1.77x10^-2	-0.512690184
GNA14	7.271297333	7.160667354	7.402879333	7.371900000	6.315524917	7.538788250	5.995581083	5.305669583	6.351442250	5.519997344	5.381100529	6.664880892	-1.307064251	6.523310739	-4.365896198	8.27x10^-4	1.77x10^-2	-0.513822534
FANCD2	6.142880083	6.221125917	6.934292500	7.150758750	7.137157667	7.194054083	8.548497333	8.371350333	7.593003233	7.937322088	7.528506833	8.010645750	1.201509429	7.397466214	4.365560028	8.28x10^-4	1.77x10^-2	-0.514423051
SNRPB	8.970583500	8.677175876	9.366207558	8.805077425	8.902530917	8.645416982	9.712507750	10.256431580	9.765303750	11.238536040	9.642005611	10.120087840	1.227980053	9.508488736	4.364873774	8.29x10^-4	1.77x10^-2	-0.515648978
AK3	10.202135520	10.815790810	10.931488680	10.655350450	10.377871950	10.565234260	8.763657582	9.530365735	9.036141251	8.966822464	9.434897621	10.425965870	-1.231670192	9.975476850	-4.364653527	8.29x10^-4	1.77x10^-2	-0.516042440
TSEN2	7.987449408	7.827339833	7.532744992	7.840010167	7.411397750	7.595089806	8.534611000	8.617811778	8.221308038	8.645965000	8.296364485	8.820499380	0.823754621	8.110882636	4.364184908	8.30x10^-4	1.77x10^-2	-0.516879623
ADI1	13.618489870	12.739292780	14.371225240	14.279058900	14.118971080	13.644130050	11.481042040	11.975282330	12.101305810	11.970828950	11.805967600	13.576397260	-1.643390658	12.973499330	-4.360587327	8.35x10^-4	1.78x10^-2	-0.523307444
LOC204010	13.035193330	12.011894170	12.762655000	12.608524170	12.299103850	12.447996670	13.942134170	14.294696670	14.109675100	14.042479200	13.778149080	12.653046670	1.275802283	13.165462340	4.360128247	8.36x10^-4	1.78x10^-2	-0.524127783
SLC38A6	9.775957652	9.108565417	10.123185500	9.234298544	9.406232500	9.485161113	10.554526920	10.578609100	10.718015830	11.802944590	10.099683170	11.564150830	1.364088286	10.204277600	4.357468296	8.40x10^-4	1.78x10^-2	-0.528881350
NEK4	8.368729958	8.435954579	8.500014000	8.647073210	7.960706000	8.256763750	9.805871674	9.164258417	8.949290000	9.372399675	8.964879987	9.363611618	0.908511646	8.815796072	4.357286711	8.40x10^-4	1.78x10^-2	-0.529205886
PAFAH1B3	7.431109348	6.763717667	6.033468184	7.008561417	6.455844000	6.795506282	10.869702500	8.784241798	8.396161333	9.418554590	8.722486574	7.228723840	2.155277290	7.825673128	4.357032519	8.40x10^-4	1.78x10^-2	-0.529660194
TMEM209	8.924620029	8.866242728	8.412983167	8.957552167	8.378180917	9.064045204	9.658197449	9.519173083	9.343272060	9.946274458	10.324062420	9.659630853	0.974497685	9.254519544	4.356546190	8.41x10^-4	1.78x10^-2	-0.530529411
OR3A1	7.058617253	7.757277667	8.675185083	8.866242728	7.405963000	6.761860000	0.067004467	2.514564250	5.893070344	5.457761772	5.030306747	4.545175917	-3.836210372	5.836085769	-4.356028336	8.42x10^-4	1.78x10^-2	-0.531454999
SORBS3	10.747367760	10.542508750	10.602630000	10.606273620	11.038950810	10.407557170	9.210694500	9.448178417	9.315046276	10.084899330	9.716217667	10.225087520	-0.990860733	10.162117650	-4.355604974	8.43x10^-4	1.78x10^-2	-0.532211719
KIAA0562	8.497307563	8.653513630	8.496285167	8.871934583	8.670001750	8.135984917	7.452369428	7.643550646	7.188278333	7.762514937	7.110386500	8.202258083	-0.994278280	8.057032128	-4.354221299	8.45x10^-4	1.78x10^-2	-0.534685039
LPA	16.103330820	16.277708490	15.652472960	16.328130000	16.399038330	15.843849170	10.353328920	14.384721770	13.442964570	13.868217500	13.916280000	14.774840110	-2.644029483	14.778740220	-4.353880335	8.45x10^-4	1.78x10^-2	-0.535294542
FAM9C	6.211200333	3.264396626	1.027909096	3.054854917	4.089816500	2.139969316	-0.369916303	-2.134338442	0.249255292	0.102078833	0.496780725	1.136132183	-3.384692417	1.605678256	-4.353821282	8.45x10^-4	1.78x10^-2	-0.535400107
A2M	17.700855410	17.530112120	16.320476140	16.659890430	17.385194280	17.297777550	14.913444770	13.902479370	15.208272760	14.968326030	16.950034470	13.215638790	-2.289351626	16.004375180	-4.352418815	8.47x10^-4	1.78x10^-2	-0.537907284
HEY1	8.752170250	7.621790750	8.278038917	7.525013323	7.874550731	9.039458855	10.988131670	8.985341083	10.415377170	9.932547985	9.056063643	9.915118417	1.700259523	9.031966899	4.350957079	8.50x10^-4	1.78x10^-2	-0.540520637
XAGE3	6.279856333	6.251512250	7.022631250	7.644702953	7.460865833	5.840249750	2.063117008	5.343226382	4.895523417	4.150763092	3.581531833	5.605800583	-2.476642676	5.511648390	-4.350729849	8.50x10^-4	1.78x10^-2	-0.540926907
KCNE3	7.379578704	5.123322833	7.353417500	6.428524667	6.337233167	6.655581833	7.769058975	8.196548500	7.948524903	8.554758167	7.837626250	8.203440583	1.538716446	7.315634674	4.350486840	8.50x10^-4	1.78x10^-2	-0.541361397
DDAH1	12.594707450	13.262161670	12.756607900	12.957574170	12.057793090	13.478324170	11.097131300	11.574463330	12.293116670	11.430262500	10.360461080	11.650101670	-1.450271982	12.126058750	-4.349978131	8.51x10^-4	1.78x10^-2	-0.542270967
PCDH8	5.379752417	5.324770083	7.489150376	7.095234486	7.106006235	6.110084041	2.120821164	4.356272986	5.020430250	4.472346194	4.123079381	4.617670000	-2.299062944	5.267968134	-4.349215273	8.52x10^-4	1.79x10^-2	-0.543635005
LMNB2	7.634560083	7.062005224	5.395916500	6.121122202	6.005108389	6.673736667	9.712933167	9.164665583	8.293327833	8.302172000	8.368183833	7.103272750	2.008684350	7.486417019	4.346333767	8.57x10^-4	1.79x10^-2	-0.548787874
LOC728564	6.691020364	6.842751799	6.832227910	6.717700109	7.542848583	6.875462901	4.511053833	5.541925083	5.303148333	5.115896420	6.391180832	6.264874167	-1.395655499	6.219174195	-4.345876017	8.58x10^-4	1.79x10^-2	-0.549606528
FXN	9.328974167	9.537548250	9.797325049	9.970297083	9.213936667	8.811603263	7.889203667	8.534250841	8.193643167	8.029594120	7.692925250	9.048020917	-1.212007753	8.837276870	-4.345573991	8.58x10^-4	1.79x10^-2	-0.550146692
AGFG1	9.919309256	10.484123350	10.222295370	10.184228610	9.838806216	10.835816700	11.796207870	11.868658760	11.216402550	11.039871820	10.727394440	11.678712120	1.140444676	10.817652250	4.343766111	8.61x10^-4	1.80x10^-2	-0.553380235
LOC100132050	9.567912333	9.694309500	11.112873790	11.192775890	11.342723360	10.398015680	7.438629749	8.331274250	9.086751333	8.949802083	9.402895500	9.196219417	-1.817173037	9.642848574	-4.342860663	8.62x10^-4	1.80x10^-2	-0.554999833
LRCH3	6.587301155	6.564492823	8.248462917	8.212806250	8.758043333	7.766759000	5.805883583	6.051102417	5.362743583	5.920970833	6.178576583	6.555923750	-1.710444121	6.834422186	-4.340169461	8.66x10^-4	1.80x10^-2	-0.559814162
PRIM1	7.883854733	7.354848833	9.067790083	8.464703917	8.374857083	8.128307833	9.733003061	11.458450000	9.191384380	10.771144630	8.996670552	10.421190510	1.882913441	9.153850468	4.339120507	8.68x10^-4	1.80x10^-2	-0.561690856
CYP2J2	13.787596020	14.172090000	13.429135830	13.446996670	13.778149080	13.961530830	9.503444980	11.941032500	12.579184050	11.618355830	12.157580830	12.695955000	-2.013324206	12.755920970	-4.338376572	8.69x10^-4	1.81x10^-2	-0.563021908
FAM164C	7.290317057	8.449479333	7.072544750	8.576827560	7.292144833	6.729803109	5.617851250	5.855657417	6.064750111	6.335273167	6.179776333	6.559349053	-1.466409885	6.835314498	-4.336468439	8.72x10^-4	1.81x10^-2	-0.566436214
HEATR1	8.421087417	8.919370050	7.756098417	8.614237583	8.224320750	8.557123913	10.521537000	10.940759610	9.057091497	9.939188833	9.240322000	9.609937083	1.469432982	9.150089512	4.334267425	8.76x10^-4	1.81x10^-2	-0.570375056
LOC344332	5.739986250	4.604164167	5.677654083	3.764204802	3.034331500	5.257832667	7.077299267	8.500906934	8.351181833	8.010336833	6.818590333	5.287976500	2.661353039	6.010372097	4.331686726	8.80x10^-4	1.82x10^-2	-0.574994013
SERTAD1	12.106387010	12.845187500	12.039509170	12.558897500	12.110514170	12.573798330	11.968522220	10.523593440	10.941460340	11.342723360	11.557179170	10.796570000	-1.184040858	11.780361850	-4.327688881	8.86x10^-4	1.83x10^-2	-0.582150762
TCEB1	12.798371140	12.931057500	13.105919460	13.204942500	12.844223330	12.906254170	13.608441670	14.072091670	13.757157500	14.899029870	14.051256350	13.608441670	1.034275103	13.482265570	4.327137782	8.87x10^-4	1.83x10^-2	-0.583137443
TAT	10.931125570	11.497150000	11.041514170	11.065059030	10.621705720	11.208977590	5.614953423	6.838692204	7.840799192	6.402938917	6.072330000	11.755362330	-3.640076000	9.240884011	-4.325191094	8.90x10^-4	1.84x10^-2	-0.586623024
IARS	9.756514750	10.103026360	10.122664250	9.857580412	9.614933083	9.965920917	11.444417500	11.427682380	10.996964170	10.509402880	10.525513170	10.555447970	1.006464717	10.406672320	4.324977024	8.91x10^-4	1.84x10^-2	-0.587006344
OCC-1	8.386784167	6.979205917	6.500560083	6.693584833	6.733186167	8.079454917	11.753108330	9.258663091	9.438779583	9.281635416	9.911877083	8.032852000	2.384023237	8.420807632	4.321393746	8.96x10^-4	1.84x10^-2	-0.593423376
PLXNC1	6.603730417	4.798325083	5.528072917	4.063045000	3.380473484	4.416692581	7.764354454	7.155951020	7.758020447	7.653208424	6.459804189	5.786174833	2.297862314	5.947321071	4.321242817	8.97x10^-4	1.84x10^-2	-0.593693694
PAQR4	7.476502754	7.844067667	8.089138758	8.802324989	9.964052500	8.913225289	6.060817245	6.829298767	6.357898788	7.405727758	6.843183142	7.142564250	-1.741637001	7.644066826	-4.320804314	8.97x10^-4	1.84x10^-2	-0.594479076
C20orf132	6.667022750	6.612374583	6.273780162	6.479991750	6.683027739	5.506462333	5.058792750	4.788375500	5.642814333	4.286052667	3.535784492	5.491436417	-1.569900527	5.585492956	-4.319795721	8.99x10^-4	1.85x10^-2	-0.596285592
DEPDC1B	10.781754170	10.458215360	11.450535830	11.367901670	12.723960310	11.771705430	10.374919290	10.357475500	9.830582250	9.684705917	9.033669589	9.535591333	-1.622854816	10.614251390	-4.319304274	9.00x10^-4	1.85x10^-2	-0.597165875
ASGR2	16.328130000	16.864709570	15.839000670	16.320476140	16.616331400	16.271357500	14.016340000	15.027708330	15.138525830	14.793919170	16.155597320	14.045013330	-1.510483549	15.618092440	-4.317238976	9.03x10^-4	1.85x10^-2	-0.600865518
LOC81691	3.703387667	3.764977083	4.290487917	2.003383008	4.152017020	4.410396083	6.081368833	6.804242597	4.958113583	5.796119583	4.594369833	6.066297667	1.995977220	4.718763406	4.314604812	9.08x10^-4	1.86x10^-2	-0.605584832
LRRN2	9.363611618	9.601452890	10.648666610	10.670408830	9.475446973	9.972388250	7.880646750	8.269437620	9.125932583	8.935228917	8.965154393	8.415831105	-1.356623967	9.277017212	-4.313212012	9.10x10^-4	1.86x10^-2	-0.608080432
ITGA2	5.858452417	4.731271750	-1.475015289	2.645044500	0.900525321	5.462092607	7.969744167	7.573140500	6.797214735	7.424850167	8.268895750	8.074019333	4.664248891	5.352519663	4.312588985	9.11x10^-4	1.86x10^-2	-0.609196828
SPRY2	9.186657917	9.342310833	9.620868197	9.801709757	9.372083917	9.379069521	6.955177333	8.305302777	8.477725451	7.723471833	8.949290000	8.380790633	-1.318490352	8.791204847	-4.312097710	9.12x10^-4	1.86x10^-2	-0.610077167
CD1D	8.688832948	8.599770500	8.603025250	8.778555083	8.000087454	8.328626250	6.699449333	6.944984333	7.660249519	6.679739000	5.268605583	7.861111083	-1.647459772	7.676086361	-4.312084355	9.12x10^-4	1.86x10^-2	-0.610101099
EDIL3	5.232827583	2.902208195	1.027909096	2.509607042	3.615272000	4.262892704	6.680353516	6.973297071	5.798751667	6.919953583	5.141217417	4.841044500	2.800650189	4.658777864	4.311263630	9.13x10^-4	1.86x10^-2	-0.611571852
PAIP2B	11.222450010	10.567325020	10.535192830	10.867934830	11.037451670	10.325564770	8.557664093	9.792461718	9.884209347	8.356471162	8.653962000	10.206918110	-1.517372117	10.000633800	-4.309983023	9.15x10^-4	1.86x10^-2	-0.613866860
KIAA0196	10.134852540	9.803700417	10.367995500	9.882667254	9.603063000	10.085375500	10.837346080	11.012183330	10.810132500	11.296786670	10.719520520	10.498475830	0.882798454	10.421008260	4.308082420	9.18x10^-4	1.87x10^-2	-0.617273290
PPIA	14.597825000	14.485637500	14.439508330	14.683255000	14.175931630	14.179014810	15.640277500	15.660487870	15.285263930	15.601630830	15.368191670	14.654142500	0.941470338	14.897597210	4.307151171	9.20x10^-4	1.87x10^-2	-0.618942490
CHML	7.521892750	7.534868471	7.006760833	6.802513328	7.530411250	7.519274783	10.282549020	9.235490250	8.122686879	8.054706646	8.809157464	8.630395250	1.536544016	8.087558911	4.307120429	9.20x10^-4	1.87x10^-2	-0.618997595
PALM2-AKAP2	15.680436670	16.381776670	15.596337160	16.286462730	14.774840110	15.338464170	14.249427500	14.667050000	14.061328330	13.822753330	12.759158330	14.784152500	-1.619074583	14.866848960	-4.306055641	9.22x10^-4	1.87x10^-2	-0.620906270
LOC391532	12.708539530	12.596988330	12.647195130	12.887319170	12.421211670	12.233585830	13.671167500	14.079810000	13.558063630	13.580874170	13.667792500	12.817264330	0.980022078	13.072484320	4.303783810	9.25x10^-4	1.87x10^-2	-0.624979004
GDF6	6.597803667	6.655581833	7.006368381	7.176393333	5.958201705	7.312649891	4.594369833	6.217813167	5.870669750	5.606411251	5.058792750	4.673786667	-1.447525899	6.060736852	-4.302718746	9.27x10^-4	1.87x10^-2	-0.626888538
PGM1	13.122629170	12.976678310	13.911294850	13.493481900	13.586850780	12.755780830	11.401937400	12.098237490	11.596395830	11.338928330	10.647301920	13.113822500	-1.608348726	12.503611610	-4.301652303	9.29x10^-4	1.87x10^-2	-0.628800658
EFHC1	6.724845500	6.294124336	5.448432227	5.646469250	5.984725317	6.051102417	7.915623083	7.867200898	7.184754124	6.529449406	7.503181776	6.897880583	1.291398471	6.670649077	4.301633645	9.29x10^-4	1.87x10^-2	-0.628834114
NPM1	14.197629170	13.726085000	14.180920000	13.957342250	13.594176240	14.061328330	15.014995000	15.380491420	14.975404680	14.876856670	14.304366290	14.761021670	0.932609123	14.419218060	4.298649903	9.34x10^-4	1.88x10^-2	-0.634184555
CAPN6	7.392767500	6.897057917	7.139042798	7.356972837	8.150453009	8.386784167	7.782275500	4.221684667	4.941940076	4.751735549	5.230159063	4.357539000	-2.339624062	6.384034340	-4.297718083	9.36x10^-4	1.88x10^-2	-0.635855680
GNPAT	10.745951340	10.492548750	10.643605280	10.813064000	10.489328120	10.838613330	12.590930830	12.117020000	11.214759970	12.567295410	10.974129170	12.324960460	1.294330836	11.317683890	4.297465939	9.36x10^-4	1.88x10^-2	-0.636307890
HIST1H3A	13.449994170	13.218696160	13.204942500	12.931057500	13.054166210	13.018853330	14.728277280	13.733457500	13.768728190	14.695996670	13.818878330	14.191391670	1.009836627	13.651203290	4.296935081	9.37x10^-4	1.88x10^-2	-0.637259983
PPAP2B	12.506985380	12.973690970	13.055729740	13.733457500	12.539518330	12.730006670	11.134965000	11.214759970	12.644283250	11.272183330	10.510159870	11.833882250	-1.488192486	12.179135190	-4.295436957	9.40x10^-4	1.88x10^-2	-0.639947021
DNAJC9	11.266967500	11.015974570	11.264253330	11.209723330	11.100654170	11.682848730	13.172923330	13.430131470	12.580303330	13.439404170	11.568671950	11.981231690	1.438707385	11.976090630	4.295427931	9.40x10^-4	1.88x10^-2	-0.639963210
STIL	1.993249939	0.177961250	1.027909096	2.828214667	0.000000000	0.593234683	5.937202167	5.458873667	3.761293916	5.897898500	1.111464983	5.169498480	3.452610346	2.829733446	4.294919907	9.41x10^-4	1.88x10^-2	-0.640874455
DCUN1D5	10.402131250	10.932380350	11.353071020	11.030931670	10.577937260	11.048932500	12.090120830	12.622549170	11.523042500	12.129515000	11.785961670	11.566161670	1.061994465	11.421894570	4.294706659	9.41x10^-4	1.88x10^-2	-0.641256966
LOC391282	12.123452500	11.555778510	12.050274170	11.726290940	12.011894170	12.523552950	12.992473330	13.644130050	13.327518330	12.579184050	12.883526670	12.757717580	1.032217798	12.514649440	4.294570374	9.41x10^-4	1.88x10^-2	-0.641501429
PDCL3	10.837346080	10.779691920	10.650385460	10.428665600	10.405416080	10.853438330	12.519555000	11.815424920	11.532385000	11.645539670	11.418444500	11.156103380	1.022084834	11.170199660	4.291533445	9.46x10^-4	1.89x10^-2	-0.646949437
LOC100130892	15.110045880	14.069721670	15.501115000	14.808248330	14.551130000	14.958175470	16.175598330	16.252249170	16.004572890	16.399038330	15.721276530	15.390884170	1.157530511	15.411837980	4.284728957	9.58x10^-4	1.91x10^-2	-0.659159538
LIPG	10.570795830	9.839971167	10.463588640	11.216402550	9.798293583	10.512963330	7.831177816	8.228838356	8.284919000	9.802087200	7.496572833	9.714813000	-1.840601150	9.480035276	-4.283063247	9.61x10^-4	1.91x10^-2	-0.662149233
ZNF643	5.520726335	5.805344417	3.782206000	3.933671000	4.671396625	5.526201440	6.858487085	7.481728750	6.332485750	6.725152389	5.841581684	6.431682250	1.738595349	5.742555310	4.282909409	9.61x10^-4	1.91x10^-2	-0.662425361
LOC100128893	6.733590667	6.540071998	7.412775914	7.326509236	5.543366490	5.965736833	5.616854714	3.957548833	5.336412333	5.226481583	3.326561875	4.559667750	-1.916420675	5.628798186	-4.281510659	9.64x10^-4	1.92x10^-2	-0.664936141
FAM20C	12.290254290	12.112904150	11.824799480	12.167538330	12.580303330	11.849531100	9.721892932	10.995025830	11.416077150	11.278121560	9.695886083	11.063249870	-1.442512876	11.416298680	-4.280579195	9.65x10^-4	1.92x10^-2	-0.666608244
LHPP	12.084254170	13.451314740	13.338456300	13.090553330	13.555915000	13.185719240	10.918550110	10.894075500	11.318979180	12.080029420	11.862119850	12.616484260	-1.502662409	12.366370930	-4.279912275	9.66x10^-4	1.92x10^-2	-0.667805507
LOC729259	15.212722250	14.380580650	15.027708330	14.872041500	14.526078330	15.225789170	16.125758410	16.084135000	15.885992500	16.413585700	15.484697500	15.449490000	1.033123147	15.390714950	4.278308326	9.69x10^-4	1.92x10^-2	-0.670685123
SNED1	6.426775581	6.496446955	6.622395750	6.533525248	6.352616167	5.882911468	3.153012417	3.983450833	5.019713417	4.281807000	5.657366814	5.719167333	-1.750025559	5.510765749	-4.277630638	9.71x10^-4	1.92x10^-2	-0.671901873
LOC284120	7.855203333	7.272982333	8.535645346	8.048264526	9.005593750	8.103384083	7.128259667	6.776897802	6.260324356	6.432742833	7.281569667	7.149722500	-1.298592758	7.487549183	-4.276259217	9.73x10^-4	1.92x10^-2	-0.674364322
DKFZP586H2123	9.281142796	7.975919083	8.753203980	9.269329000	7.912629253	8.490255223	6.804745530	4.733019333	7.329206287	7.554897446	7.176834433	6.138175842	-1.990933411	7.618279851	-4.275913146	9.74x10^-4	1.92x10^-2	-0.674985739
MCM7	10.780025000	11.069368330	10.911858850	11.121185000	11.459333770	11.628184620	13.183719080	13.561224170	12.064207500	12.442047780	11.956901860	11.907194140	1.357556491	11.840437510	4.273626778	9.78x10^-4	1.93x10^-2	-0.679091515
RPL38	16.736707170	16.434905590	16.399038330	16.346064520	16.510768330	16.776284300	17.369974650	17.651784790	17.450782680	16.844230410	17.483762880	17.321425240	0.819698735	16.943810740	4.273379293	9.78x10^-4	1.93x10^-2	-0.679535971
SLC4A4	10.083398600	10.058591330	10.075038580	10.112650530	10.110437560	9.747584250	9.227354847	4.615239344	5.722242344	5.919385583	6.704721750	9.346859275	-3.108649619	8.476958667	-4.271910400	9.81x10^-4	1.93x10^-2	-0.682174068
C5orf27	9.437962333	9.808637771	9.943840917	13.580874170	12.333563550	9.735882000	5.996626070	6.550555926	8.876866872	8.062716014	7.953476198	8.058173221	-3.223724406	9.194931253	-4.269228657	9.85x10^-4	1.94x10^-2	-0.686990971
PDE2A	11.732597500	11.149695000	11.363492540	10.308795940	10.722772500	12.527252500	8.442009083	9.353802781	10.228237680	9.264117167	9.976461583	10.137966080	-1.733668602	10.433933360	-4.268435490	9.87x10^-4	1.94x10^-2	-0.688415782
GLA	11.116710120	11.552643680	11.060306230	11.036322500	11.246272500	11.146885020	12.648048700	11.985243670	12.068188330	12.800076670	12.213462500	11.511562530	1.011240389	11.698810200	4.255993481	1.01x10^-3	1.98x10^-2	-0.710774253
RPL17	15.601630830	15.009892500	15.436265970	15.270820000	15.001294890	15.686269170	16.428972500	16.381776670	16.094965830	16.809265000	15.907464700	16.010482210	0.937792259	15.803258360	4.254795055	1.01x10^-3	1.99x10^-2	-0.712928649
HSD11B1	16.131971670	16.403683330	16.685385380	16.523278330	16.336328060	15.712556670	11.252405000	10.349128580	12.170651570	12.107413160	13.218696160	16.890013400	-3.634149260	14.481792610	-4.253803519	1.01x10^-3	1.99x10^-2	-0.714711231
WWC2	9.752350566	9.935907000	9.495209139	9.543220353	9.712933167	9.249207487	8.755874083	9.227014782	8.761824575	8.258116500	8.804699333	8.568009217	-0.885548203	9.172030517	-4.251748950	1.02x10^-3	1.99x10^-2	-0.718405238
LOC442245	5.734810333	7.029879667	8.129189083	7.878254390	7.140543459	7.347991917	4.882306167	5.478154833	5.924866000	5.615748583	6.031771333	5.818560250	-1.584876947	6.417673001	-4.251305386	1.02x10^-3	1.99x10^-2	-0.719202798
AP1G2	9.116412636	8.803070854	8.913225289	9.102301366	11.015974570	10.040881020	7.279073752	7.409522638	7.057368668	7.636917972	8.580490673	8.414386689	-1.769017557	8.614135510	-4.248931561	1.02x10^-3	2.00x10^-2	-0.723471432
LOC100131138	9.274910167	9.635847167	10.736820830	10.645321060	10.707090670	9.761683657	6.654785833	9.099606894	8.082979838	8.228838356	9.020181417	8.692342000	-1.830489869	9.211700657	-4.248368045	1.02x10^-3	2.00x10^-2	-0.724484833
CABYR	4.768304000	5.147355022	1.027909096	0.147304583	1.137822513	5.925761833	8.997260062	4.896793158	6.823713667	8.588618500	8.104676167	10.565234260	4.970306461	5.510896072	4.248064498	1.02x10^-3	2.00x10^-2	-0.725030730
ZNF259	10.433276830	10.508627080	10.433678450	10.387749920	10.017333560	10.640956750	11.215481740	11.992566670	10.606821530	11.403249920	11.824799480	11.753662000	1.062493124	10.934850330	4.246483570	1.03x10^-3	2.00x10^-2	-0.727874011
UFD1L	11.489165270	11.867196840	11.733179170	11.605291670	11.309782500	11.442624170	12.223261540	11.894693330	12.798371140	13.097224170	12.986029000	12.510857840	1.010532902	12.079806390	4.245518331	1.03x10^-3	2.00x10^-2	-0.729610102
DCI	14.802359170	15.285263930	15.314630480	15.138525830	15.390884170	15.125190830	13.804948330	13.792820480	13.901026470	14.122050000	14.563192000	14.884481670	-0.998055911	14.677114450	-4.245485000	1.03x10^-3	2.00x10^-2	-0.729670052
PRDM14	2.946409583	0.177961250	1.027909096	2.854189083	3.479204577	3.419507758	-0.112113525	0.141257917	0.249255292	0.102078833	0.005980223	0.132998375	-2.230954039	1.202053205	-4.243891197	1.03x10^-3	2.00x10^-2	-0.732536891
PSMD4	13.516598080	13.516598080	13.397209860	13.408902500	13.459305830	13.463119170	14.685900000	14.501587500	13.675730830	14.910574170	14.155211330	15.212722250	1.063332092	13.991954970	4.243746015	1.03x10^-3	2.00x10^-2	-0.732798050
PSG9	2.220092358	2.290669771	3.722211500	3.546733846	2.978765625	1.935585317	0.067004467	0.141257917	-0.485429033	2.003383008	2.032730725	0.132998375	-2.133685493	1.715500323	-4.243443505	1.03x10^-3	2.00x10^-2	-0.733342219
HAGH	12.604917510	13.076896670	13.800297710	13.270845830	13.408902500	12.645445830	9.751295500	10.019776830	11.456507610	11.652233430	10.636527650	12.929507630	-2.060242901	12.104429560	-4.243282824	1.03x10^-3	2.00x10^-2	-0.733631262
CDKN2C	10.559621420	9.591359667	10.096236180	9.807828355	10.532975530	10.426934350	11.650101670	11.423628330	11.474823800	10.531143580	11.020173330	11.809760220	1.149112573	10.743715540	4.243273268	1.03x10^-3	2.00x10^-2	-0.733648454
MT2A	17.071018330	17.736795440	17.385194280	17.682496670	17.682496670	17.877508640	13.976558710	16.277708490	15.484697500	15.987845030	14.045013330	17.113763050	-2.091653986	16.526758010	-4.242165476	1.04x10^-3	2.00x10^-2	-0.735641297
MAT1A	16.985042440	16.776284300	16.017765830	16.602190830	16.566785000	15.517980830	12.079180830	14.120867360	14.147619990	15.110045880	14.180920000	15.726677410	-2.183456295	15.319280060	-4.241736600	1.04x10^-3	2.00x10^-2	-0.736412849
C21orf2	6.383652000	6.565200608	6.567616857	6.593408333	6.533525248	5.715393250	4.876841836	5.199124750	5.651362417	5.760385417	5.558911698	5.501661250	-0.968418155	5.908923638	-4.240760019	1.04x10^-3	2.00x10^-2	-0.738169795
DPH2	8.855555143	9.450152667	8.724579917	9.158423119	8.826817083	8.776104833	10.715589650	10.719173510	9.596275333	10.167366330	9.389442310	10.091340220	1.147925767	9.539235011	4.234945328	1.05x10^-3	2.02x10^-2	-0.748632797
LIPC	13.228277500	13.104609400	13.981057100	13.197863670	14.444107500	11.475564170	11.241145430	11.757654020	10.240819450	11.622735830	9.818897667	11.873603700	-2.146103872	12.165527950	-4.233648568	1.05x10^-3	2.02x10^-2	-0.750966645
POLR2G	12.718788200	12.066363330	12.753943490	12.538244970	12.562705270	12.702469290	13.919351670	13.718192190	13.382825830	13.752790000	13.104609400	13.057303910	0.932093074	13.023132300	4.233486603	1.05x10^-3	2.02x10^-2	-0.751258154
DYNLL1	14.520162170	13.957342250	14.139743810	14.112301140	13.797040000	14.363901880	15.652472960	14.747769170	15.133164100	15.411672500	14.984121670	14.679018360	0.952954583	14.624892500	4.231777556	1.05x10^-3	2.03x10^-2	-0.754334292
ND5	12.435455830	12.671629160	12.982820830	12.720867580	13.035193330	11.766374170	10.161053800	10.609697540	11.082013330	11.063249870	12.492144310	10.959004550	-1.540862918	11.831625360	-4.231252476	1.06x10^-3	2.03x10^-2	-0.755279449
MTCP1	10.181422290	10.245277830	10.763074170	10.865983430	10.701561820	10.419473920	9.438302424	8.776104833	9.463255792	9.326865917	9.384020167	10.303976330	-1.080711333	9.989109911	-4.228484073	1.06x10^-3	2.03x10^-2	-0.760263079
FAM178A	6.839987500	6.576873083	6.041928724	6.317121833	6.528053500	6.574694250	7.445162333	7.542154667	7.127028074	7.549819740	7.095733095	7.115775507	0.832835754	6.896194359	4.227985883	1.06x10^-3	2.03x10^-2	-0.761159990
CPD	9.377293333	9.361743000	8.966504000	9.918722083	9.459977750	9.595558500	10.300069670	11.414689170	11.445530830	10.800696660	11.001548290	9.665962594	1.324783090	10.109024660	4.227289809	1.06x10^-3	2.03x10^-2	-0.762413200
SERPING1	11.690921670	12.057793090	12.028298330	11.868658760	12.135050830	11.038950810	8.251471599	8.659215299	9.983000030	10.030524480	9.155461575	11.812815830	-2.154530780	10.726013530	-4.227108070	1.06x10^-3	2.03x10^-2	-0.762740411
PER1	8.811227787	9.222248500	9.648374112	8.595596167	10.101816730	9.288350278	6.731547917	7.649282333	8.019987500	7.502290096	8.317723667	8.610073750	-1.472784719	8.541543236	-4.226825040	1.06x10^-3	2.03x10^-2	-0.763249996
NAP1L5	7.699965703	7.514139917	8.370332833	7.866525000	7.861660022	7.889203667	6.050058351	7.146633962	7.466291043	6.681823266	6.859746689	6.365248917	-1.105337486	7.314302448	-4.226519550	1.07x10^-3	2.03x10^-2	-0.763800028
ESCO2	5.627809583	5.811420626	7.004371500	4.844092417	5.003927250	6.585695097	9.421637917	9.467939500	7.647094472	7.898853833	6.191097490	8.746821250	2.416021331	7.020896745	4.225759895	1.07x10^-3	2.03x10^-2	-0.765167817
ADFP	13.062483390	13.655233280	14.120867360	13.681888230	12.381504940	13.824048030	11.183414970	12.299103850	12.383273930	12.490677700	11.240499530	12.261441000	-1.477935709	12.715369680	-4.225315439	1.07x10^-3	2.03x10^-2	-0.765968106
GRM2	9.625828583	10.286976150	10.337632330	10.970617500	11.551114750	10.092499080	5.859479083	7.191919961	8.602339917	7.934683445	9.682439939	8.971319874	-2.437081031	9.258904218	-4.224828775	1.07x10^-3	2.03x10^-2	-0.766844414
LMX1B	4.725752727	5.313138792	5.067813699	5.523682333	5.486332167	5.039457917	4.345512250	4.089816500	3.725511333	3.611013350	4.739956952	4.440534611	-1.033972106	4.675710219	-4.223265020	1.07x10^-3	2.04x10^-2	-0.769660337
LOC100133056	7.358939047	7.648409167	8.251083083	8.025550083	9.454108583	8.807923679	6.022671250	5.031001167	6.063145087	7.482167820	6.578845349	7.039225931	-1.888159507	7.313589187	-4.218179179	1.08x10^-3	2.05x10^-2	-0.778820256
NUDT10	7.021526665	8.604669250	6.848283713	6.253781500	4.912718917	6.932072950	5.115290333	4.379157537	4.096587083	5.646469250	4.141118167	3.984426667	-2.201667326	5.661341836	-4.217811490	1.08x10^-3	2.05x10^-2	-0.779482582
RPL15	14.517580830	13.622189040	14.520162170	14.269501030	13.923926010	14.380580650	15.436265970	15.529077890	15.129437540	15.460020000	14.711054170	14.893926960	0.987640464	14.699476850	4.217328095	1.08x10^-3	2.05x10^-2	-0.780353353
GOLT1B	7.813883483	7.946820000	8.514092500	7.673306603	7.365883500	7.973255167	9.129447986	8.077830733	8.995318113	9.142744333	9.390117417	9.440808750	1.148171013	8.455292382	4.210343144	1.10x10^-3	2.08x10^-2	-0.792938289
ZCWPW1	11.144767750	10.848006670	10.687029690	11.304013330	11.111932090	10.493329420	10.107099000	8.921052896	10.651055830	9.537027250	9.658775464	9.545228000	-1.194806751	10.334109780	-4.204184525	1.11x10^-3	2.10x10^-2	-0.804038256
CCDC99	7.049864000	7.227193471	7.199777333	7.218132451	7.783205326	7.605675427	8.182687000	9.295597250	8.097264739	8.662279083	7.835121083	9.136149500	1.187541775	7.941078889	4.204181769	1.11x10^-3	2.10x10^-2	-0.804043222
GBA	9.531629297	9.727678209	8.870266360	9.297086464	9.579760583	9.456747500	9.982578083	10.117220380	10.339004750	10.619037000	11.275372950	10.426934350	1.049496517	9.935276327	4.203624754	1.11x10^-3	2.10x10^-2	-0.805047335
DDB2	12.466665000	11.533169670	11.193320830	12.492144310	11.767215000	11.949245000	10.416531580	10.869702500	11.440039170	10.497551080	10.633880000	10.569871830	-1.162363942	11.319111330	-4.202291874	1.11x10^-3	2.10x10^-2	-0.807450189
MPZL1	8.304624333	8.332961917	8.294470408	8.102687705	7.460205000	8.597042333	10.628062500	9.518925667	9.376176250	10.146367680	9.113238750	8.653962000	1.390790192	8.877393712	4.197733030	1.12x10^-3	2.12x10^-2	-0.815669929
GPR158	3.938569833	3.007825036	1.027909096	5.128962160	4.953885250	3.961721292	7.449811084	9.221191417	7.160068167	3.842627371	8.553933583	8.792160667	3.833486604	5.586555413	4.196873716	1.12x10^-3	2.12x10^-2	-0.817219520
LOC440731	8.108611303	8.880109083	9.050289083	8.918256207	7.761141333	8.576332689	10.398592170	10.351495180	10.029998520	10.374919290	8.617811778	10.909457010	1.564589042	9.331417804	4.194286585	1.13x10^-3	2.13x10^-2	-0.821885279
C1orf67	7.085268667	7.780870174	7.279073752	7.829078000	6.389739155	6.879136789	8.896738000	9.148506774	7.875795138	9.267934684	7.814116833	9.677288423	1.572868886	7.993628866	4.193221783	1.13x10^-3	2.13x10^-2	-0.823805777
LOC400581	7.156980004	7.091023750	8.686936917	8.089401167	7.654669250	6.758490610	3.442086192	6.594174415	5.781689406	5.511906833	5.484309500	6.113472833	-2.084977086	6.530428406	-4.192917888	1.13x10^-3	2.13x10^-2	-0.824353906
HPS3	7.867608917	6.748745026	6.747107059	6.547583833	5.810315417	7.189757250	9.193736125	8.547462292	8.272565151	9.291759583	7.391638246	8.051689083	1.639622163	7.638330665	4.191439239	1.14x10^-3	2.13x10^-2	-0.827021047
TP53TG1	12.540010000	12.232691210	12.042163880	12.137962990	12.603745830	12.356922500	11.111932090	10.625016830	12.015859170	10.823507430	11.690921670	10.313117000	-1.222190371	11.707820880	-4.191189978	1.14x10^-3	2.13x10^-2	-0.827470675
EPB41L4B	10.564215250	10.304232080	10.835816700	11.424480000	11.136272690	10.367995500	7.576018885	9.796731917	7.612737333	8.549828107	9.376891333	10.165770410	-1.925839039	9.809249183	-4.183904112	1.15x10^-3	2.16x10^-2	-0.840615834
LOC644387	3.182469083	3.384198592	5.787371402	2.938212083	3.623822667	4.484503750	6.239242670	6.011265667	5.385443000	7.237969583	4.958113583	6.280615183	2.118678685	4.959435605	4.183854645	1.15x10^-3	2.16x10^-2	-0.840705101
DNMT3B	7.721146833	5.962383917	6.800261250	6.014510586	7.226961333	7.011355833	9.420909333	9.189943667	8.317970417	9.038361083	7.415648333	7.807730424	1.742323917	7.660598584	4.183351962	1.15x10^-3	2.16x10^-2	-0.841612224
COX18	9.470374917	9.614933083	9.653569500	9.990494333	9.640439532	9.126329609	9.003948500	8.400770417	9.009639465	8.226370333	8.750942167	8.704019077	-0.900075169	9.132652578	-4.181162048	1.16x10^-3	2.16x10^-2	-0.845564346
LBR	13.244617500	12.362560830	11.993335000	13.024740000	12.557928330	13.086443840	14.670521670	14.279058900	13.422063050	14.555046670	13.351799170	13.804948330	1.302302047	13.362755270	4.180125268	1.16x10^-3	2.16x10^-2	-0.847435569
TENC1	8.261917167	7.882746261	7.626332105	7.676746333	7.407157583	7.862112168	6.733186167	6.007380250	7.286104747	7.051972667	6.785462667	6.794978587	-1.009654422	7.281341392	-4.179751913	1.16x10^-3	2.16x10^-2	-0.848109441
MCAM	8.767119433	7.749334667	7.072967561	6.989517333	7.189256234	7.828373177	9.142229583	8.824666250	9.322826667	8.779447072	10.002889530	8.361865583	1.472892713	8.335874424	4.175790311	1.17x10^-3	2.18x10^-2	-0.855260557
TLL2	3.227988083	3.924107500	3.329116371	4.341460219	4.298439500	3.991844167	6.062038719	4.763198750	5.249242000	5.869332667	5.025404559	4.372866000	1.371521143	4.537919878	4.173799992	1.17x10^-3	2.18x10^-2	-0.858853843
INTS7	7.860300583	8.090545510	8.490975500	7.722213667	7.296119167	7.831177816	9.112742055	8.961162417	8.748815667	9.529382595	8.355293250	8.887129500	1.050532207	8.407154811	4.170070451	1.18x10^-3	2.20x10^-2	-0.865588070
BHMT	15.436265970	15.164469040	15.475345000	15.507993950	15.051587890	15.350637500	9.181281333	11.241145430	13.128961300	11.105835000	10.506981320	15.655935990	-3.527693162	13.567203310	-4.169377534	1.18x10^-3	2.20x10^-2	-0.866839372
LSDP5	9.133590316	10.018193260	9.169250566	9.147713500	9.763833833	8.729351995	6.124532547	6.985709833	7.998774816	6.417833333	8.122686879	8.896738000	-1.902609677	8.375684073	-4.169094730	1.18x10^-3	2.20x10^-2	-0.867350087
PODXL	12.478040000	10.756956720	8.935646714	9.423548333	10.216863330	11.046309170	12.919145910	12.205456670	13.488807600	12.161110000	13.064263280	12.168602500	2.191670282	11.572062520	4.167578344	1.19x10^-3	2.20x10^-2	-0.870088641
ANGPT2	6.872103573	6.119863331	6.060025811	4.959070888	5.819496967	4.683769879	6.870469631	8.577463058	7.455015280	6.825641115	7.928778219	7.164156785	1.717865606	6.611321211	4.164603033	1.19x10^-3	2.21x10^-2	-0.875462590
CKS1B	11.409347500	11.264253330	12.162106670	11.634220000	11.679770320	11.905085000	13.816293330	13.778149080	13.023231990	12.997956160	11.761451400	12.975477500	1.382962774	12.367278520	4.160119013	1.20x10^-3	2.23x10^-2	-0.883563067
LOC283481	9.894908583	8.701853737	9.713394917	8.932865167	9.225948948	8.653149083	7.867200898	8.213976583	5.990161167	6.397855385	7.300511250	8.454218750	-1.816366067	8.278837039	-4.155141275	1.21x10^-3	2.24x10^-2	-0.892557594
HIST1H3E	12.994441560	12.838492390	12.719995000	12.562705270	12.959059170	12.783534170	13.720734170	13.429135830	13.100494170	14.139743810	13.750928330	14.001112910	0.880653613	13.250031400	4.154744118	1.21x10^-3	2.24x10^-2	-0.893275332
SIRT3	9.538673113	9.750946113	10.318488750	10.282905920	10.194028770	9.432996640	8.958441635	8.975950673	8.940072750	8.789246077	8.627262461	9.461784583	-0.960880187	9.439233123	-4.154464477	1.22x10^-3	2.24x10^-2	-0.893780707
TREX2	6.350006750	6.585695097	6.218793333	6.205718583	7.026876870	5.547002417	3.898007167	3.209118250	5.462092607	3.533963344	5.074360000	5.625348750	-1.855200489	5.394748597	-4.153853000	1.22x10^-3	2.24x10^-2	-0.894885809
ZNF193	8.645750500	8.071878772	7.619586750	7.306366500	8.082684288	8.098721333	9.106457151	9.080003333	9.168244000	8.512084514	8.908277917	9.766912256	1.119498505	8.530580609	4.153143837	1.22x10^-3	2.24x10^-2	-0.896167496
UNC93A	8.853759214	9.516985000	9.581689217	9.567912333	10.531143580	9.946508250	4.719047564	8.779447072	8.030036500	7.933690750	5.972118295	7.483764733	-2.513315447	8.409675209	-4.149322515	1.23x10^-3	2.26x10^-2	-0.903074646
PON2	12.401120000	13.001960570	13.468756670	12.809747500	12.567295410	12.624732980	13.795005830	13.757157500	14.654142500	15.096034940	14.336365980	13.228277500	1.332228520	13.478383120	4.145524272	1.24x10^-3	2.27x10^-2	-0.909941383
ATOH8	9.244067751	9.287331921	9.486856000	8.854520750	8.787468159	9.849281378	5.687372309	6.045641667	7.342246205	6.859372161	9.224447000	7.710879243	-2.106594562	8.198290379	-4.145159559	1.24x10^-3	2.27x10^-2	-0.910600805
S100A3	5.135056583	5.272239200	5.355483472	5.459508083	4.202582793	4.536530500	7.183759000	6.633705833	7.131453167	6.547166500	5.718571167	5.480916250	1.455695214	5.721414379	4.145137331	1.24x10^-3	2.27x10^-2	-0.910640995
PGLYRP2	11.601905000	11.791673330	11.672987500	11.956901860	12.307546520	10.721392900	5.721548333	4.840783000	8.932208917	7.499688750	12.100064790	6.094367746	-4.143957596	9.603422386	-4.144465253	1.24x10^-3	2.27x10^-2	-0.911856184
GDA	11.226773330	11.682848730	11.093442680	11.809760220	11.781073160	11.911599170	9.940268167	6.521639588	9.787487728	8.525826083	10.639754020	9.824776000	-2.377624284	10.395437410	-4.143634509	1.24x10^-3	2.27x10^-2	-0.913358314
UBR5	7.727569917	7.512268978	6.966907062	7.286324790	6.630504167	7.512658385	8.298350667	8.681948839	7.961846833	8.355664167	7.882746261	8.321380250	0.977617286	7.761514193	4.143365737	1.24x10^-3	2.27x10^-2	-0.913844314
CSAD	9.230962650	9.061670648	8.859062000	9.218432750	8.530222417	7.704997538	5.750304583	5.606411251	6.736108155	6.774821327	8.667902010	7.144880333	-1.987486724	7.773814638	-4.140524066	1.25x10^-3	2.28x10^-2	-0.918983084
MYO5C	8.100702445	7.608575887	7.494667083	7.533156167	7.203296297	8.257637167	9.627454223	8.227333500	8.793206062	8.645750500	8.991470083	8.619446841	1.117771027	8.258558021	4.139708476	1.25x10^-3	2.28x10^-2	-0.920458100
C9orf68	7.235813833	8.248950942	7.578605854	7.886581917	7.866215309	7.147733583	6.999653500	5.521197333	5.612956833	5.294801000	7.213005417	6.261858417	-1.510071490	6.905614495	-4.138833308	1.25x10^-3	2.28x10^-2	-0.922040930
LOC390413	13.529635830	12.328770750	14.081664770	13.292885770	13.372362500	14.084845830	14.501587500	14.928061490	14.645585830	14.825947500	14.728277280	14.298995000	1.206381524	14.051551670	4.138134129	1.25x10^-3	2.28x10^-2	-0.923305514
MICAL3	8.232585250	8.275240667	7.543842583	7.573533250	8.250787740	8.158495936	7.068077417	6.986206333	7.117929411	7.140543459	7.540000802	6.623081813	-0.926441032	7.542527055	-4.138058850	1.25x10^-3	2.28x10^-2	-0.923441673
CTHRC1	7.984347917	5.636787667	5.827103333	5.498675103	3.955284333	6.516445562	12.465498390	10.665097500	12.120108700	13.048037860	9.241478667	5.685716500	4.634548951	8.220381794	4.134338572	1.26x10^-3	2.29x10^-2	-0.930171187
SLCO1B3	11.916773330	13.574015680	14.304366290	14.424812600	13.652360830	13.313457500	7.257667250	4.677282105	8.575967250	11.994197500	7.628781190	12.530284170	-4.753601128	11.154163810	-4.133809550	1.26x10^-3	2.29x10^-2	-0.931128221
SSR3	10.173739520	9.676411083	10.078426170	9.432341833	9.252533750	9.454108583	10.637980790	11.204552500	10.660489890	10.766353070	10.545057070	10.147454000	0.982387730	10.169120690	4.133377665	1.26x10^-3	2.29x10^-2	-0.931909546
C17orf50	8.319596833	8.433787333	9.030987668	9.105459844	10.448247040	9.601772750	6.693584833	7.230449098	7.275831901	6.957196333	8.268116917	8.351181833	-1.693915092	8.309684365	-4.133254754	1.26x10^-3	2.29x10^-2	-0.932131908
TBC1D12	7.237969583	6.645374750	6.516093722	6.498356583	6.113127293	6.568012215	8.257134833	7.519563250	7.687176396	7.599937250	7.064557417	7.511404611	1.010139935	7.101558992	4.132635003	1.26x10^-3	2.29x10^-2	-0.933253139
TATDN3	9.000105475	8.556268607	9.504399194	8.867872488	8.875425417	9.001220917	10.092499080	9.320599900	9.826400167	10.261476420	9.805423979	10.586717830	1.014637547	9.474867456	4.130712353	1.27x10^-3	2.30x10^-2	-0.936731742
C19orf66	11.736053710	11.838105830	11.301173290	11.317779170	11.808153860	11.337141670	9.527197467	10.380427170	10.722071670	10.343162890	10.728389350	11.095576740	-1.090263707	11.011269400	-4.129633562	1.27x10^-3	2.30x10^-2	-0.938683715
ZNRD1	11.745247670	11.474823800	11.622071670	11.602263150	11.439493330	11.492320310	11.976267500	12.978997500	12.342009560	12.238496670	12.268181670	12.480057500	0.817965078	11.971685860	4.129105124	1.27x10^-3	2.30x10^-2	-0.939639913
POLR2K	11.673787320	11.539753330	12.339904170	11.750508620	11.655701650	11.968522220	12.753943490	12.403637500	12.767947500	12.583506270	13.149582530	12.444966670	0.862567773	12.252646770	4.127935427	1.28x10^-3	2.30x10^-2	-0.941756542
PCK2	15.475345000	15.735406210	15.561358540	15.960287500	16.389473330	15.893150000	11.623584170	11.942205790	14.321745000	13.061445330	13.627113330	15.758678330	-2.446708104	14.612482710	-4.126527375	1.28x10^-3	2.31x10^-2	-0.944304647
UXS1	8.710747159	8.461746657	8.564756513	8.955049750	8.469234843	9.430407668	10.422738580	10.175586730	9.924295574	9.970297083	9.269329000	9.336111643	1.084402671	9.307525100	4.125589240	1.28x10^-3	2.31x10^-2	-0.946002456
GRIA1	5.997786167	6.497781314	8.111806964	8.353380083	9.134070917	6.075932000	0.630334024	4.694261833	4.629004583	5.617851250	1.029185475	4.585845750	-3.830712422	5.446436697	-4.125128096	1.28x10^-3	2.31x10^-2	-0.946837049
CTAGE6	9.607056667	10.496460250	10.330297000	10.409637720	10.546534670	9.955549750	8.545366667	8.467282732	8.599427022	9.676824111	9.484369333	9.484369333	-1.181316143	9.633597938	-4.124823581	1.28x10^-3	2.31x10^-2	-0.947388179
MED11	10.224260470	9.834027500	10.345274160	10.263591170	10.221488080	9.941146083	9.384945000	9.612757711	9.261389167	9.322454583	9.459977750	9.499725333	-0.714756318	9.780919750	-4.124011250	1.28x10^-3	2.31x10^-2	-0.948858429
NMRAL1	10.661845420	10.410442420	10.693874170	10.527131180	10.894831670	10.760809200	10.172483920	9.871794417	9.728062603	9.478034083	10.120087840	9.940852250	-0.772936490	10.271687430	-4.122707937	1.29x10^-3	2.31x10^-2	-0.951217435
PID1	11.063249870	11.821330830	12.494789080	12.045846670	12.114006670	11.933295830	10.367228000	11.179437500	11.170136670	10.415377170	10.290538250	11.130257100	-1.153257376	11.335457800	-4.122560499	1.29x10^-3	2.31x10^-2	-0.951484308
OR2M2	7.197494683	7.474032503	8.508154417	8.536610299	7.666632500	6.589514333	5.300053551	5.968402917	7.019317250	6.641485296	5.414789167	5.667969583	-1.660070162	6.832038041	-4.118115358	1.30x10^-3	2.33x10^-2	-0.959531221
MRAP2	4.943741002	5.511395667	4.839741167	5.636787667	5.290810250	5.697696077	6.298839456	7.536858804	6.899284103	6.208669417	8.805077425	9.630409365	2.243161123	6.441609200	4.116270700	1.30x10^-3	2.34x10^-2	-0.962871060
EIF3M	13.429135830	13.283055000	13.426957320	13.210399170	13.344095320	13.474101550	14.045013330	14.499251670	13.789232500	13.923926010	14.097455000	14.225525830	0.735443360	13.729012380	4.115723336	1.30x10^-3	2.34x10^-2	-0.963862145
ACOT9	10.087030090	10.079837290	10.014278850	9.598556767	9.762410569	10.222295370	10.939108470	10.469942270	10.639754020	11.118957570	10.573363830	10.808178610	0.797482640	10.359476140	4.114987977	1.31x10^-3	2.34x10^-2	-0.965193664
CPAMD8	8.493342167	8.704392333	9.092774167	9.309844667	9.270395417	8.479680271	6.440509917	7.317175167	7.524716833	7.547801462	8.419254000	8.122686879	-1.329714127	8.226881107	-4.113488975	1.31x10^-3	2.34x10^-2	-0.967908061
TMEM37	11.435130430	12.293116670	11.476436670	11.997839170	12.066363330	12.252520500	10.976322580	10.564215250	11.347755830	10.717182850	10.958235670	11.258952500	-0.949790346	11.445339290	-4.111608204	1.31x10^-3	2.35x10^-2	-0.971314043
PRKDC	8.055457583	8.254956917	7.633059302	7.932347571	7.672191831	8.180604953	9.782987301	9.731911747	8.489850825	9.475845583	8.377515917	8.944160417	1.178942272	8.544240829	4.109905459	1.32x10^-3	2.35x10^-2	-0.974397893
RPS21	16.111219210	15.542123280	16.036450690	15.633437380	15.809947680	16.084135000	17.352013690	17.497568390	16.872188330	17.094937500	16.125758410	16.566785000	1.048656348	16.393880380	4.109052725	1.32x10^-3	2.35x10^-2	-0.975942379
MGC70863	14.405463330	13.767053330	14.316076670	14.292014630	13.909193330	14.544720000	15.360601210	15.809947680	15.416103600	15.037449170	14.667050000	14.860477500	0.986184642	14.698845870	4.108227041	1.32x10^-3	2.35x10^-2	-0.977437930
LOC400960	8.752672483	8.721830352	9.020181417	8.421887390	8.516032833	8.200124250	8.057296474	7.556618500	7.932347571	7.673306603	7.877142583	7.737214437	-0.799800426	8.205554574	-4.107655354	1.32x10^-3	2.35x10^-2	-0.978473455
TMCO7	8.013449167	8.401509476	8.637752417	8.816478918	8.795882083	7.896776791	7.865673917	7.439072250	7.367649500	6.950705750	6.516859583	7.657363615	-1.127420706	7.863264455	-4.107650390	1.32x10^-3	2.35x10^-2	-0.978482446
YEATS4	9.994777717	9.359672530	10.463251670	9.704840899	10.084899330	10.011117000	10.837822500	11.172765000	10.655350450	10.670408830	10.614166140	11.290937060	0.937148472	10.405000760	4.106229400	1.33x10^-3	2.36x10^-2	-0.981056478
EGFR	9.372708948	9.922047704	9.389442310	9.421899072	9.591359667	8.637180322	8.103848333	8.176986500	7.927397250	8.025550083	7.190972362	9.159804083	-1.291679902	8.743266386	-4.105926260	1.33x10^-3	2.36x10^-2	-0.981605619
SORBS2	10.272356500	10.665842360	10.054739670	10.313579000	10.650385460	10.583408890	9.558022592	8.041228018	8.761428158	8.678438000	9.687579306	9.948936167	-1.310779937	9.767995342	-4.105239028	1.33x10^-3	2.36x10^-2	-0.982850574
EHHADH	11.208310830	10.805310830	11.648830000	11.781073160	10.972342500	11.214052750	6.410929333	8.257637167	9.312201000	8.648014000	7.470716667	11.409347500	-2.686845735	9.928230479	-4.104299832	1.33x10^-3	2.36x10^-2	-0.984552042
GLRX	13.687112500	15.033089170	14.116853330	14.249427500	13.759202520	13.729899170	12.662737650	12.809747500	13.165123330	12.947293330	13.233915000	13.376485320	-1.063380340	13.564240530	-4.100966370	1.34x10^-3	2.37x10^-2	-0.990591626
LOC100133920	5.686888667	6.162290800	5.915156833	6.312865500	4.996611667	6.034698522	7.073425250	7.121322667	6.561667038	7.117091167	7.138420528	6.413420293	1.052805826	6.377821578	4.098955936	1.35x10^-3	2.37x10^-2	-0.994234601
FARSB	9.586463654	10.178753670	9.794646917	10.107525430	9.539878431	9.693443500	10.739513330	11.404220000	10.293769170	11.437040510	10.450122250	10.725665830	1.024936583	10.329253560	4.098939987	1.35x10^-3	2.37x10^-2	-0.994263503
STOM	11.505013380	12.213462500	11.887473010	11.849531100	11.467567610	11.465775830	9.684705917	10.352977000	11.723229170	10.407040570	10.421763300	10.221488080	-1.262936568	11.100002290	-4.098571465	1.35x10^-3	2.37x10^-2	-0.994931317
TGS1	6.394085917	6.074561083	5.986706750	5.839141333	6.253781500	6.131078250	7.214581417	7.621081301	6.829719667	6.943660417	6.412867500	7.117091167	0.909941106	6.568196358	4.098448812	1.35x10^-3	2.37x10^-2	-0.995153583
LOC391160	12.479209170	12.390999170	12.349384170	11.937772500	11.756047500	12.454175220	13.354503000	13.232627500	12.980782020	13.434703420	13.231475670	12.551401670	0.902984258	12.679423420	4.097119718	1.35x10^-3	2.38x10^-2	-0.997562193
SLC31A1	10.014836530	10.267612150	10.925023330	10.242560750	10.301446250	9.909639560	8.303121000	8.606264482	9.384453083	8.778555083	9.224079583	10.012997690	-1.225274607	9.664215791	-4.097050668	1.35x10^-3	2.38x10^-2	-0.997687332
RAB15	10.548046920	10.806948330	9.124020438	10.485242850	9.988239750	9.687115000	11.044163330	12.169652500	11.363109170	11.488305890	11.027390000	11.264253330	1.286210157	10.749707290	4.095767584	1.35x10^-3	2.38x10^-2	-1.000012713
DAP3	14.055630420	14.122050000	13.831144300	13.939041000	13.877945000	14.134694170	15.208272760	14.841034170	14.228291700	15.368191670	14.705024520	14.876856670	0.877861099	14.432348030	4.094416772	1.36x10^-3	2.38x10^-2	-1.002460992
LOC128192	12.972108370	12.905315830	12.919145910	13.120808330	12.568220830	12.473522500	13.861452500	14.304366290	13.799151670	13.792820480	13.898801380	13.016705830	0.952362729	13.302701660	4.093627591	1.36x10^-3	2.38x10^-2	-1.003891414
HPX	14.164496480	14.400620830	14.610596670	14.324220830	14.455752890	13.060169800	8.558107992	10.133701000	12.608524170	11.749804570	12.538244970	12.864753450	-2.760453557	12.789082800	-4.093537928	1.36x10^-3	2.38x10^-2	-1.004053936
PLA2G16	14.551130000	14.849058240	14.765550830	15.164469040	14.711054170	14.151746670	14.138350710	12.886135000	13.247995870	12.951638330	13.655233280	14.238265240	-1.179231751	14.109218950	-4.093404873	1.36x10^-3	2.38x10^-2	-1.004295111
ATP1B3	11.961629170	11.924960980	11.411320830	10.165770410	10.404185580	11.510441670	13.312421780	13.558063630	12.618652630	13.060169800	12.200133750	12.090120830	1.576875629	12.018155920	4.093153472	1.36x10^-3	2.38x10^-2	-1.004750800
LOC100127993	15.006209280	14.215357500	14.876856670	14.708300470	14.380580650	14.833813330	15.816242390	15.907464700	15.601630830	15.933068330	15.133164100	15.208272760	0.929787539	15.135080080	4.092593567	1.36x10^-3	2.38x10^-2	-1.005765706
C11orf54	12.964421670	13.203191990	13.963166670	13.678802500	13.641655720	13.598280000	10.115076350	11.520585000	12.903131820	11.715420890	12.312732500	12.441023330	-1.673591441	12.671457370	-4.091281682	1.36x10^-3	2.38x10^-2	-1.008143784
ADAMTSL2	9.580645727	8.909425137	8.113062173	8.606795514	7.332034592	9.327620858	7.124075562	7.415942554	7.248848725	6.854075480	5.842935187	4.600512749	-2.130532291	7.579664521	-4.091013415	1.37x10^-3	2.38x10^-2	-1.008630095
WNT11	7.377624833	8.614790540	8.288745632	8.741599217	8.338176225	8.756680750	6.196772250	6.777941167	6.335273167	7.392025417	7.955867750	7.091670000	-1.394677908	7.655597246	-4.087616442	1.37x10^-3	2.40x10^-2	-1.014788602
ALDH9A1	12.104820690	12.324960460	12.334497270	11.787720030	12.170651570	11.249100320	11.229383580	10.551962590	10.716738170	10.527951450	10.716133600	11.650844680	-1.096456048	11.447063700	-4.086826676	1.38x10^-3	2.40x10^-2	-1.016220541
SULT2A1	14.744203980	15.093629610	15.390884170	14.944139170	14.654142500	14.765550830	8.920475667	12.313887970	12.475329170	11.424480000	11.322137650	14.984121670	-3.025353024	13.419415200	-4.084195489	1.38x10^-3	2.41x10^-2	-1.020991570
SAMD10	10.127889380	10.374919290	11.326649170	11.099344170	10.502579060	8.700464167	6.657141833	9.925272936	8.479340682	8.480200774	7.628101000	7.245917317	-2.285978446	9.212318313	-4.084171452	1.38x10^-3	2.41x10^-2	-1.021035159
ACSM3	9.855815699	9.679392336	11.167934350	11.198875040	10.625776830	9.103927168	7.785752252	9.183954564	7.153504755	7.106825489	5.635359132	9.458426599	-2.551316438	8.996295351	-4.079899170	1.39x10^-3	2.42x10^-2	-1.028783170
FETUB	13.055729740	13.675730830	13.319731670	13.614515830	13.976558710	13.327518330	6.897410759	8.616041833	13.442037500	9.685993679	10.227164130	11.420065800	-3.446845236	11.771541570	-4.077984536	1.40x10^-3	2.43x10^-2	-1.032255959
LOC646909	13.076896670	12.420074170	12.789758330	12.540010000	12.987353330	13.549056670	13.576397260	14.328504290	13.460504170	14.062703330	14.055630420	13.808483920	0.988179038	13.387947710	4.073614202	1.41x10^-3	2.45x10^-2	-1.040184073
CCS	10.457935670	10.647766670	11.147981670	11.030322030	11.121185000	10.437645080	8.888719716	8.871775417	9.406232500	9.553132833	10.073055500	10.538702670	-1.251869580	10.181204560	-4.070470124	1.42x10^-3	2.46x10^-2	-1.045888650
C2orf29	8.223848000	8.535148332	8.424075833	8.203073417	8.255967951	8.379022984	9.738541667	9.990951833	8.776985927	9.499362390	8.784806073	9.137700332	0.984535284	8.829123728	4.070276448	1.42x10^-3	2.46x10^-2	-1.046240081
TUBB6	12.262120000	12.133000000	11.647796670	11.504347500	11.846595710	12.452744170	13.068067460	12.494789080	13.190042500	12.887319170	12.599432500	13.274514640	0.944593551	12.446730780	4.067123667	1.43x10^-3	2.47x10^-2	-1.051961320
KIAA0564	8.788928144	9.112423417	8.921052896	8.914474750	9.080467586	8.791223309	7.795204852	7.668903625	7.460435083	6.268943917	8.041613917	8.553375848	-1.303348810	8.283087279	-4.064792235	1.43x10^-3	2.48x10^-2	-1.056192615
PDSS2	9.624519484	10.488263000	10.556686000	10.584211740	10.649638330	10.231087970	8.938970917	9.106061333	9.321516583	9.295279000	9.789124000	9.785822333	-0.982938728	9.864265058	-4.063040910	1.44x10^-3	2.48x10^-2	-1.059371374
RPH3AL	8.408422855	9.187820750	9.048458449	9.147423000	9.537027250	8.979908583	6.901784750	7.976633917	7.216543083	7.954882417	8.548895083	8.268895750	-1.240237648	8.431391324	-4.062879806	1.44x10^-3	2.48x10^-2	-1.059663799
SNRPE	11.233565330	11.047450000	11.909026780	11.491547720	11.317779170	11.416990440	13.286326670	13.749258330	12.349384170	12.610020000	11.647796670	12.668184170	1.315768427	12.060610790	4.061289744	1.44x10^-3	2.49x10^-2	-1.062550094
B3GNT7	7.132418571	7.656601667	8.471211971	8.830963187	9.168762833	7.965639614	4.963439709	5.554586500	6.078974250	5.841078118	7.366278333	7.534227584	-1.981168892	7.213681861	-4.059845635	1.45x10^-3	2.49x10^-2	-1.065171635
CSTF2	8.781609667	8.492257667	8.256566500	8.355293250	8.059082667	8.516032833	10.222295370	10.331172830	8.549305942	9.668472750	9.140048785	10.051505710	1.250326468	9.035303664	4.058411598	1.45x10^-3	2.50x10^-2	-1.067775060
ILF2	12.109599560	11.943209900	11.900090000	11.962217910	11.618355830	11.955607730	14.308383330	13.606414610	12.688900000	13.652360830	12.073285000	13.181998330	1.337043530	12.583368590	4.057962422	1.45x10^-3	2.50x10^-2	-1.068590552
CCDC138	4.797834750	4.484126243	5.204950833	4.977143916	5.047934250	4.922515250	6.139904417	7.684002542	5.903365833	6.216971000	5.273311306	7.336274333	1.519887365	5.665694556	4.056491797	1.45x10^-3	2.50x10^-2	-1.071260630
MS4A15	6.854075480	6.804745530	7.348596917	7.068558833	8.568619667	7.125778667	5.208907667	5.995581083	6.092342191	4.961022083	6.322195579	6.454462155	-1.455977389	6.567073821	-4.056111530	1.46x10^-3	2.50x10^-2	-1.071951074
GTPBP4	10.630100720	11.038378330	10.517016670	11.191021670	10.252291420	10.906429290	12.933707500	12.499246670	11.567917500	12.343476670	11.341644650	11.425418150	1.262695506	11.387220770	4.055824319	1.46x10^-3	2.50x10^-2	-1.072472566
RRP15	8.043502511	8.753808917	8.746255830	8.711165531	8.211291471	8.228838356	9.856350333	9.991645500	9.243079198	9.969533219	8.571881250	10.084899330	1.170421036	9.034354288	4.055143118	1.46x10^-3	2.50x10^-2	-1.073709456
CYP39A1	9.613193333	9.607559333	11.895386820	11.233565330	10.100819250	9.139735250	6.483310083	4.756631167	7.384831583	9.172704750	6.594809760	9.081100333	-3.019478607	8.755303916	-4.054766530	1.46x10^-3	2.50x10^-2	-1.074393262
SDF2L1	14.485637500	14.532724990	13.789232500	14.328504290	14.400620830	14.388036670	15.843849170	14.963324170	16.399038330	15.721276530	15.331407500	14.695996670	1.171689263	14.906637430	4.052263485	1.47x10^-3	2.51x10^-2	-1.078938564
TMEM165	9.364876917	9.211891833	9.222990000	8.746821250	8.226370333	9.617966083	11.356552710	10.333392900	10.405416080	10.398592170	10.118810510	9.531629297	1.292246207	9.711275840	4.050529512	1.47x10^-3	2.51x10^-2	-1.082087601
LOC646890	12.124820000	11.816060830	11.605291670	11.337141670	11.497150000	12.021386670	13.259037500	12.608524170	12.484337500	12.266681650	12.428000830	12.966659170	0.935231664	12.201257640	4.045962532	1.48x10^-3	2.53x10^-2	-1.090382772
AIG1	14.179014810	14.228291700	14.011760630	14.468377980	14.155211330	13.808483920	11.582760120	12.967737680	12.328770750	13.166491240	13.635076400	13.331873300	-1.306405147	13.488654150	-4.045573133	1.48x10^-3	2.53x10^-2	-1.091090128
ID1	15.356938170	14.495685830	14.754798880	15.843849170	14.420754170	15.750891670	12.781265830	11.296786670	14.708300470	13.175849770	13.833177500	11.778188330	-2.174891551	14.016373870	-4.045563248	1.48x10^-3	2.53x10^-2	-1.091108085
KIAA1429	12.071968640	11.548526820	11.373850000	11.484278180	11.490691670	11.585103430	12.452744170	12.763277190	12.461287200	12.564049170	12.490677700	11.851010830	0.838104588	12.011455410	4.044712596	1.49x10^-3	2.53x10^-2	-1.092653369
THBS4	6.451438500	5.546576583	6.472978562	6.767251704	5.629478667	6.696747417	9.520402597	8.507473000	10.765473820	6.500828333	7.785052276	10.906429290	2.736864648	7.629177563	4.042617115	1.49x10^-3	2.54x10^-2	-1.096460239
KIAA1009	6.861498009	5.837174333	6.469685009	5.946730775	5.831808083	6.408466167	7.732445167	7.335450934	6.933094176	7.006368381	7.079783605	7.083530626	0.969218419	6.710502939	4.042323551	1.49x10^-3	2.54x10^-2	-1.096993588
ARMET	14.360557380	14.351604310	13.292885770	13.541103460	13.718192190	14.328504290	16.119017200	15.051587890	16.336328060	15.925766490	15.129437540	14.164496480	1.522297711	14.693290090	4.042247219	1.49x10^-3	2.54x10^-2	-1.097132268
SNRPD1	12.379114920	12.536152500	12.101305810	12.565396670	11.772630890	12.262846800	13.898801380	14.298995000	13.340391670	14.074617710	12.796038330	12.692603330	1.247333306	12.893241250	4.040259871	1.50x10^-3	2.54x10^-2	-1.100743078
UBE2Q2	7.310725083	6.297062917	7.339147958	6.970060450	6.473352000	6.925726529	7.805561500	8.514092500	9.040680767	8.862449750	7.826236667	7.287955871	1.336817020	7.554420999	4.039655007	1.50x10^-3	2.55x10^-2	-1.101842117
MASP2	12.233585830	12.458203330	12.338242500	13.032121670	13.034332500	11.736714170	6.986691583	8.767119433	10.265989750	9.666435750	11.135560830	11.763877500	-2.707920858	11.118239570	-4.038439321	1.50x10^-3	2.55x10^-2	-1.104051110
PMPCA	10.682801670	11.466991670	11.017515660	11.110141310	11.581874190	10.846183310	9.586961417	10.084899330	9.485161113	9.373794500	11.013501670	10.009387300	-1.191967080	10.521601090	-4.036250019	1.51x10^-3	2.56x10^-2	-1.108029533
TMEM201	13.177578540	14.179014810	13.209461250	14.061328330	12.019597500	12.317348540	11.408024170	12.308587500	10.973250000	11.015974570	9.866019049	11.956901860	-1.905928637	12.207757180	-4.036016747	1.51x10^-3	2.56x10^-2	-1.108453460
SLC25A37	7.979916638	8.051238158	8.192512369	7.876707333	8.235817667	7.651592167	7.233932500	7.559216126	6.779461624	6.717700109	6.926237181	7.528142860	-0.873848989	7.561039561	-4.035728162	1.51x10^-3	2.56x10^-2	-1.108977913
SULT1A1	12.129010420	11.428215000	12.623790740	13.246340830	12.593077990	11.497708330	8.727318333	8.548149083	9.706676912	12.133000000	10.040881020	10.636185830	-2.287655356	11.109196210	-4.034419683	1.51x10^-3	2.56x10^-2	-1.111355933
RPL30	16.119017200	15.350637500	16.142203550	15.826166820	15.843849170	15.936870830	16.685385380	16.428972500	16.736707170	16.707490940	16.872188330	16.461439180	0.778906405	16.259244050	4.033153517	1.52x10^-3	2.56x10^-2	-1.113657182
CTAGEP	10.017059800	10.707862020	10.837346080	10.736820830	10.838613330	10.213218670	8.597921045	8.734360240	9.677854824	10.033934500	9.448951158	9.805871674	-1.175337881	9.970817847	-4.032990293	1.52x10^-3	2.56x10^-2	-1.113953850
PLXDC1	6.581201502	6.437828598	5.209887170	5.900324110	6.046217000	7.229585500	7.050242833	7.585589083	8.576827560	8.015783364	9.004758130	7.099899417	1.654676085	7.061512022	4.031443903	1.52x10^-3	2.57x10^-2	-1.116764596
TTLL1	5.871921771	4.225591833	5.132207277	4.072921093	5.055562654	5.175263667	6.892346117	6.402938917	5.791694426	6.366103667	6.158860917	5.774530771	1.308834420	5.576661926	4.030793978	1.53x10^-3	2.57x10^-2	-1.117945969
HSDL2	11.337141670	11.715420890	11.674537500	11.756047500	11.414689170	11.462425000	9.383562700	10.377871950	10.551475330	9.782317917	10.310575500	11.489753940	-1.244117397	10.937984920	-4.028411482	1.53x10^-3	2.58x10^-2	-1.122276928
C5orf37	8.696349667	8.162667000	8.013078250	7.069168981	7.238975319	7.401876500	9.118712750	9.075100969	8.756680750	8.713805417	8.637180322	9.326398167	1.174293776	8.350832841	4.028052040	1.53x10^-3	2.58x10^-2	-1.122930371
LOC729449	15.059098330	14.025840270	15.607899700	14.841034170	14.408374890	15.014995000	16.074921670	16.155597320	16.036450690	16.381776670	15.699783530	15.401967500	1.132209167	15.392311640	4.027866930	1.53x10^-3	2.58x10^-2	-1.123266892
CDKN2AIPNL	8.375145167	8.026388667	9.074645663	8.066646224	8.302412269	8.350011250	9.088405940	9.749301667	9.572898047	9.709388459	8.646810217	9.813011886	1.064094496	8.897922121	4.023627725	1.55x10^-3	2.59x10^-2	-1.130974313
LOC100133788	12.533303330	12.143516860	12.986029000	12.530284170	11.824256670	12.513704210	13.502753330	13.851944170	13.818878330	13.720734170	12.612143330	13.480003970	1.075893843	12.959795960	4.022911051	1.55x10^-3	2.59x10^-2	-1.132277458
NUDCD1	8.668632500	8.819120000	9.530010733	9.231334083	8.832277394	8.936347333	10.022141440	10.652178640	9.797325049	10.158346330	9.457473808	9.757190806	0.971155671	9.488531510	4.021931445	1.55x10^-3	2.59x10^-2	-1.134058763
PIGV	10.405730400	9.598225451	10.128613460	10.307129000	10.328658580	9.948936167	8.804699333	9.071933917	8.664631415	9.062663235	8.337705750	10.022141440	-1.125586328	9.556755679	-4.021858995	1.55x10^-3	2.59x10^-2	-1.134190508
RCL1	12.756607900	14.458384170	14.505660690	14.747769170	13.822753330	13.526790000	12.555376670	12.558897500	11.284337500	10.970060000	11.047167590	13.538069170	-1.977342806	12.980989470	-4.016028068	1.57x10^-3	2.62x10^-2	-1.144794987
XPOT	9.144113160	8.847769561	9.033669589	9.232765886	8.364040748	8.974742518	9.908365821	10.494345810	10.235148750	9.907143167	9.956389417	9.135423000	1.006619083	9.436159785	4.015402041	1.57x10^-3	2.62x10^-2	-1.145933674
KIAA1841	4.403366295	0.177961250	1.027909096	1.712084317	2.881944167	4.148077167	6.364373250	5.092445083	4.746573863	4.633975667	5.476525000	4.584545917	2.757849415	3.770815089	4.015378296	1.57x10^-3	2.62x10^-2	-1.145976866
ZWILCH	8.024304898	8.303540045	7.247039216	7.247558013	7.863377583	8.202258083	9.243684250	8.983813667	8.603025250	8.629810750	8.776104833	8.573154417	0.986919221	8.308139250	4.015252038	1.57x10^-3	2.62x10^-2	-1.146206522
PET112L	8.969453750	9.350644667	9.283866583	9.236414736	9.386472167	8.905171442	7.811969083	8.422826720	8.936629000	7.772552250	8.275970417	8.378180917	-0.922315826	8.727512644	-4.014973905	1.57x10^-3	2.62x10^-2	-1.146712434
LAGE3	11.435723380	11.634935000	12.053106670	11.772630890	11.946477500	11.996271670	13.277850830	12.509751400	12.498319170	12.466665000	12.744290830	12.409248330	0.844496743	12.228772560	4.013284671	1.58x10^-3	2.62x10^-2	-1.149785210
CXCL3	9.089085179	9.319645583	10.631558780	9.665294562	10.159042710	8.681948839	7.750004583	7.925566000	8.128307833	6.850401833	9.171469658	7.967698917	-1.625521137	8.778335373	-4.013173256	1.58x10^-3	2.62x10^-2	-1.149987885
WDYHV1	8.023786583	8.336880750	8.258531167	8.034093129	7.088167883	7.922574404	9.351248500	9.796295031	9.222512667	9.767987083	9.274910167	8.024304898	1.295537405	8.591774355	4.012872330	1.58x10^-3	2.62x10^-2	-1.150535307
SLC1A1	9.473592519	11.122162340	10.570366810	10.560063970	10.304703170	9.847848103	9.122067921	5.852390750	8.727318333	8.264326917	8.582975083	8.974742518	-2.059152564	9.283546536	-4.012602797	1.58x10^-3	2.62x10^-2	-1.151025626
ACSM2B	15.652472960	15.826166820	16.488785630	16.474262010	16.066396960	15.523413520	10.073765340	13.062483390	14.001112910	13.499591430	13.350195010	15.542123280	-2.750371090	14.630064100	-4.012151786	1.58x10^-3	2.62x10^-2	-1.151846091
LBA1	8.991040083	8.658612667	8.315374000	8.023225359	8.567714167	8.591870153	7.577461833	7.692366708	8.088177583	7.147733583	7.679577568	6.721838789	-1.040113394	8.004582708	-4.011545445	1.58x10^-3	2.62x10^-2	-1.152949153
SH3PXD2A	10.156814600	8.925126841	8.135232250	9.422672083	9.087990203	9.108156805	10.339004750	10.608118330	10.463251670	10.688393330	10.985374170	9.643473826	1.315270549	9.796967406	4.011238983	1.58x10^-3	2.62x10^-2	-1.153506683
BOLA2B	12.965670830	12.759158330	12.215744630	12.168602500	12.665957500	12.502164170	14.988238330	14.735289170	13.301694170	15.490585000	14.095197810	12.798371140	1.688679610	13.390556130	4.009244735	1.59x10^-3	2.63x10^-2	-1.157134888
CNTN1	6.179776333	5.610460385	5.936746667	5.637306318	7.659064250	6.231123083	4.210603583	4.811955500	2.503950250	4.075716333	4.839050478	5.326536297	-1.914444099	5.251857456	-4.007211540	1.59x10^-3	2.63x10^-2	-1.160834267
ASAP1	6.317633455	6.330108973	5.708049550	5.102035336	5.121064281	5.894510508	6.965490137	7.554897446	6.736567951	7.267555379	6.497781314	6.508452550	1.176223779	6.333678907	4.004684054	1.60x10^-3	2.64x10^-2	-1.165433446
LOC728368	12.796038330	12.751822280	12.728620830	13.000430120	12.506266120	12.304087500	13.683212500	14.157576670	13.571564430	13.674156960	13.702353330	12.861557810	0.927192751	13.144807240	4.003285970	1.60x10^-3	2.65x10^-2	-1.167977700
NT5DC3	5.512735938	3.647173333	4.509183048	4.950502613	3.112329417	3.191172667	6.110084041	6.739066833	5.503921286	5.780594173	5.291762833	5.854303000	1.726105858	5.016902432	4.001505213	1.61x10^-3	2.66x10^-2	-1.171218565
NGF	8.131255250	7.955538750	8.527221083	8.696875167	8.218993083	7.522454917	5.218072210	5.990763625	6.857110083	5.906881691	7.312649891	7.811654822	-1.659200988	7.345789214	-4.000327761	1.61x10^-3	2.66x10^-2	-1.173361585
SERPINA6	15.293273650	16.162906730	15.368191670	15.849693330	15.849693330	15.407817500	11.540726850	13.850044280	15.372297500	13.552219410	12.817941320	14.371225240	-2.071186934	14.619669240	-3.999312967	1.62x10^-3	2.66x10^-2	-1.175208645
MLYCD	10.164504330	10.503333140	11.415505000	11.082499170	10.624586720	11.164447710	8.744296003	9.233352510	8.813176667	8.578537417	7.583908942	10.931125570	-1.845079827	9.903272765	-3.998927559	1.62x10^-3	2.66x10^-2	-1.175910159
SPACA1	6.407943878	7.103760333	7.595089806	7.594502750	7.644702953	6.703226833	5.610079583	6.315524917	6.211811883	6.101551862	6.277077750	6.250422210	-1.047126391	6.651307897	-3.998554433	1.62x10^-3	2.66x10^-2	-1.176589329
EIF3D	14.331100000	13.973583790	13.374157550	13.641655720	13.850044280	14.101645830	15.368191670	14.910574170	14.770141670	14.623027500	14.808248330	14.331100000	0.923182694	14.340289210	3.998334792	1.62x10^-3	2.66x10^-2	-1.176989127
LOC100128836	12.032715960	11.351816670	12.073285000	11.527652500	11.164447710	11.553303710	13.027954170	13.476430830	12.731059440	12.817941320	11.892846350	12.459762500	1.117128846	12.175768010	3.997801993	1.62x10^-3	2.66x10^-2	-1.177958964
CMBL	12.390299170	12.292315830	13.172923330	12.524903420	12.344934550	11.977714170	9.365389667	8.673098980	10.716133600	9.283362083	11.491547720	12.133000000	-2.173426405	11.363801880	-3.997042919	1.62x10^-3	2.66x10^-2	-1.179340718
PEA15	12.426985830	11.851705830	11.014136150	10.940759610	10.914423330	12.071385000	13.434703420	13.172923330	12.976678310	12.659589170	13.132232500	11.988391670	1.357520440	12.215326180	3.996001701	1.63x10^-3	2.67x10^-2	-1.181236134
PVALB	7.218132451	7.529208583	8.204143750	6.608026028	7.630381692	7.408149833	5.835130167	5.865743692	6.183432500	6.136364559	6.755544333	6.860060300	-1.160294464	6.852859824	-3.994873585	1.63x10^-3	2.67x10^-2	-1.183289829
ACACB	6.949996348	7.894398630	8.046648602	7.035441160	8.034093129	5.791454769	4.608097233	4.535559334	6.398298561	4.764462776	6.627795563	4.995186221	-1.970438825	6.306786027	-3.993476133	1.63x10^-3	2.67x10^-2	-1.185833974
SRPX	10.950685100	9.794646917	9.856350333	10.375847420	8.635355583	10.410442420	7.439883597	6.554727001	9.317335307	8.592941917	7.278744583	4.684244087	-2.692575212	8.657600354	-3.991853944	1.64x10^-3	2.68x10^-2	-1.188787452
LOC391504	14.972126250	14.187874170	15.006209280	14.788584040	14.242983330	15.021210390	16.142203550	16.644134170	16.259149250	15.936870830	14.992747750	15.425322230	1.196906721	15.301617940	3.991740294	1.64x10^-3	2.68x10^-2	-1.188994379
EFNA4	7.762862188	7.677437333	6.448913667	6.702166083	7.838723083	7.575747387	9.238588667	8.296710333	8.312828333	8.564567025	8.195458562	9.718869083	1.386862044	8.027739312	3.988725906	1.65x10^-3	2.69x10^-2	-1.194483148
MGMT	11.921324170	12.312732500	13.016705830	12.632307500	12.655109170	11.957932500	10.157290310	10.381952150	11.417810090	11.867196840	11.500265000	11.305639170	-1.310993020	11.760522100	-3.987543683	1.65x10^-3	2.69x10^-2	-1.196635992
NUP62	11.430262500	10.842109170	10.762445000	10.729701080	10.696287760	11.207099830	12.312732500	12.963115000	12.152045000	12.185360830	11.573140830	11.280783640	1.133212078	11.511256930	3.983778601	1.66x10^-3	2.71x10^-2	-1.203492955
RPL19	17.297777550	16.963900180	17.000876630	16.864709570	16.809265000	16.985042440	17.651784790	17.700855410	17.682496670	17.651784790	17.569848110	17.569848110	0.650841082	17.312349100	3.983056996	1.67x10^-3	2.71x10^-2	-1.204807262
SEMA4F	6.062038719	5.407816408	5.021678846	5.414789167	5.956902667	6.225693667	6.817380917	6.580667167	6.615218250	6.210517333	7.358939047	6.869578626	1.060563644	6.211768401	3.982685249	1.67x10^-3	2.71x10^-2	-1.205484364
STEAP4	7.100157333	8.430711398	7.334869167	7.454632167	5.936746667	7.803111000	4.283797000	3.926729705	7.301622978	5.128030750	5.486332167	4.779922376	-2.192298793	6.247221892	-3.982666389	1.67x10^-3	2.71x10^-2	-1.205518717
RQCD1	7.033842542	7.856165000	6.720979650	7.289899500	6.660974833	7.244696167	8.445700478	8.875425417	8.077830733	8.109472592	7.558209917	8.205779167	1.077643435	7.673248000	3.981901612	1.67x10^-3	2.71x10^-2	-1.206911721
SLC25A19	6.674529917	6.364855395	7.190612417	6.901784750	6.434192209	6.898376000	7.612737333	7.897643452	7.644515282	8.326159532	7.036892083	7.747906833	0.966917304	7.227517100	3.981304881	1.67x10^-3	2.71x10^-2	-1.207998667
C5orf28	7.930517000	7.403805417	8.457294833	7.778574000	7.239525250	7.785379276	8.616502190	8.609122156	8.666062872	8.827129083	8.370875671	9.157850750	0.942074491	8.236886542	3.980515003	1.67x10^-3	2.71x10^-2	-1.209437469
CYP8B1	13.324625830	14.614287500	14.491667090	14.084845830	14.735289170	14.130512610	7.619586750	8.229057000	9.596668083	9.756514750	12.059000000	14.645585830	-3.912469270	12.273970040	-3.980186994	1.67x10^-3	2.71x10^-2	-1.210034969
MYOT	5.481448413	0.177961250	3.706948167	5.933891583	4.505084333	4.832478417	1.736691367	0.141257917	0.249255292	-1.440900808	0.390569783	2.104299260	-3.576106559	2.318248748	-3.979770050	1.68x10^-3	2.71x10^-2	-1.210794483
SQLE	11.160949170	11.129432300	10.530548250	9.034920417	9.691859014	10.695595710	11.961629170	12.681119010	12.589566670	13.105919460	12.976678310	10.551962590	1.937261724	11.342515000	3.979649933	1.68x10^-3	2.71x10^-2	-1.211013293
GRHPR	12.922450830	13.120153640	14.563192000	14.019767500	13.858380000	12.941852500	9.755530833	10.318488750	11.956445600	10.845058480	11.744454170	13.426957320	-2.229810221	12.456060970	-3.979055631	1.68x10^-3	2.71x10^-2	-1.212095914
CD93	8.365198250	7.276179669	7.493542167	6.448041250	6.780275083	7.969744167	8.574976250	9.106457151	9.096074167	8.689081241	8.930701917	7.995885983	1.343366020	8.060513108	3.977984882	1.68x10^-3	2.71x10^-2	-1.214046528
DMRTC2	3.906375833	2.847667750	5.004975860	3.935846583	6.300060831	5.388801921	0.067004467	0.141257917	0.249255292	2.889867045	1.432391792	4.098479361	-3.084245484	3.021832054	-3.977330240	1.68x10^-3	2.71x10^-2	-1.215239150
ACADVL	14.836946130	15.356938170	14.302301130	14.455752890	14.708300470	14.788584040	13.669050820	12.777801340	13.622189040	13.761923860	14.489308080	13.239755480	-1.148132367	14.167404290	-3.977098474	1.68x10^-3	2.71x10^-2	-1.215661387
TMEM50A	12.409248330	11.908410830	12.383273930	12.086955830	11.686009170	12.324960460	13.444895830	12.990584170	13.135086070	13.588918810	12.262846800	13.543991670	1.027910797	12.647098490	3.973521337	1.70x10^-3	2.73x10^-2	-1.222178806
C15orf23	10.062941580	9.911877083	9.509885000	9.791964333	9.154347429	9.981350000	10.964506670	11.670245830	10.587113750	11.319667500	10.332770670	10.275699330	1.122939720	10.296864100	3.973247419	1.70x10^-3	2.73x10^-2	-1.222677915
RPS24	16.671959530	15.925766490	16.328130000	16.017765830	16.142203550	16.328130000	17.450782680	17.094937500	17.283391740	17.321425240	16.963900180	16.498569070	0.866508500	16.668913490	3.973071528	1.70x10^-3	2.73x10^-2	-1.222998410
C1orf31	11.865401670	11.604358900	11.915746670	11.690028310	11.460007500	11.902051660	13.336280730	13.395118330	12.505441200	12.834829170	11.793107500	13.437023640	1.144034312	12.311616270	3.971792167	1.70x10^-3	2.73x10^-2	-1.225329632
CLDN14	11.728819170	11.858195000	12.505441200	12.098237490	12.794443330	11.715420890	7.815606667	10.747961670	9.470374917	9.967309883	10.504470640	11.656295540	-2.089756296	11.071881370	-3.969753584	1.71x10^-3	2.74x10^-2	-1.229044536
RPS20	17.530112120	16.926862500	17.051153360	16.844230410	16.822011070	16.917712130	18.238866240	17.762479640	18.115289540	17.847829320	17.762479640	17.369974650	0.834139573	17.432416720	3.969039881	1.71x10^-3	2.74x10^-2	-1.230345188
IGF2BP1	3.786362000	4.018537944	1.027909096	3.352143808	2.763525500	2.674984000	9.112152000	11.117345680	7.917762948	9.986812667	2.932753606	5.205608167	4.774828787	5.324658118	3.968370290	1.71x10^-3	2.74x10^-2	-1.231565484
TCF3	10.498882230	10.028987670	9.033925833	9.496709000	10.055148070	9.797325049	11.428215000	12.176635310	10.700218330	11.051344160	11.452004350	10.235148750	1.355431341	10.496211980	3.967592809	1.71x10^-3	2.74x10^-2	-1.232982444
BUD31	10.067574040	9.972035559	10.471907250	10.310925900	10.115076350	10.068403400	10.992307500	10.808178610	10.680311670	10.891514170	10.999940000	10.722772500	0.681516991	10.508412250	3.967535283	1.71x10^-3	2.74x10^-2	-1.233087287
CYFIP2	10.435844260	10.631791670	10.628785000	10.229062340	10.726335760	10.961244990	8.994485847	9.466976417	9.804688726	9.056516513	10.380427170	8.213501082	-1.282744711	9.960804980	-3.966768714	1.72x10^-3	2.74x10^-2	-1.234484405
IL1F8	6.710383968	6.733590667	7.399689219	7.227722737	7.796102576	7.098955917	5.627809583	5.627809583	6.055427667	5.592982000	6.774248951	6.540394500	-1.124628800	6.598759781	-3.965722707	1.72x10^-3	2.75x10^-2	-1.236390887
FNDC4	10.214755130	11.347755830	9.256259333	10.926955000	9.437222173	9.577861082	7.568299728	6.686623583	7.836332892	8.043887000	9.894908583	8.375425425	-2.059221889	9.097190480	-3.964779741	1.72x10^-3	2.75x10^-2	-1.238109632
SPSB3	11.637804170	11.445530830	11.942205790	11.990605830	12.105474170	11.476436670	10.998977080	11.093003160	10.787956230	10.543181510	10.112650530	11.328819540	-0.955578234	11.288553790	-3.964335074	1.72x10^-3	2.75x10^-2	-1.238920147
ZXDA	6.487881000	6.459804189	9.189683577	8.964174000	8.830963187	7.807123926	4.428808297	5.470331669	2.355763583	6.451438500	5.589855306	6.165159446	-2.879712180	6.516748890	-3.964272850	1.72x10^-3	2.75x10^-2	-1.239033567
CDC37L1	10.117706770	11.689640710	11.453928590	12.301372500	11.289842150	11.135560830	8.655058066	9.573526125	9.377293333	9.350214750	9.400591884	11.244037410	-1.731221666	10.465731090	-3.962570350	1.73x10^-3	2.75x10^-2	-1.242136939
LNX2	8.281602535	10.055727670	9.179146417	9.811429658	8.575538333	9.376891333	7.890784833	7.595089806	7.492483044	8.094496758	7.586913000	8.673855530	-1.324452162	8.551163243	-3.962377249	1.73x10^-3	2.75x10^-2	-1.242488944
HMCN1	7.880061417	7.169243814	7.820806870	8.299568458	8.778555083	8.575538333	6.915598435	5.877632000	6.769991601	7.605675427	6.857505856	6.654518500	-1.307142026	7.433724649	-3.962200612	1.73x10^-3	2.75x10^-2	-1.242810937
SH2D3C	7.250008558	6.671652583	8.303540045	8.365198250	9.132548000	7.404692896	5.508290333	5.526201440	6.942659083	6.489371833	6.751677167	5.399910583	-1.751588315	6.978812564	-3.961830568	1.73x10^-3	2.75x10^-2	-1.243485503
RNF2	7.581139417	6.730343376	7.625821460	7.317797250	6.814249474	7.040495750	8.640440083	8.882549250	8.402445167	7.321670903	8.096482520	8.648014000	1.146959199	7.758454054	3.960676814	1.74x10^-3	2.75x10^-2	-1.245588783
RPL23AP13	10.981768330	10.438985500	11.208977590	10.902232820	10.900389170	11.373293300	11.640364170	12.875373060	12.335372500	11.636539850	11.756670000	11.799479170	1.039692007	11.487453790	3.960120480	1.74x10^-3	2.75x10^-2	-1.246603008
SERPINA5	14.187874170	14.139743810	14.460725830	14.888944170	14.925061670	14.481451670	12.034146670	13.722245000	13.494535000	13.986053330	13.300230000	12.304087500	-1.373750636	13.827091570	-3.960093688	1.74x10^-3	2.75x10^-2	-1.246651852
RPS27A	15.712556670	15.270820000	15.735406210	15.425322230	15.380491420	15.770615910	16.282085610	16.872188330	16.277708490	16.434905590	16.191085000	16.001107500	0.793978015	15.946191080	3.960009094	1.74x10^-3	2.75x10^-2	-1.246806073
BCL2L15	6.249102583	6.794978587	8.154383810	8.270788583	8.949802083	5.982288250	4.764462776	4.993484667	5.903841437	6.274391583	3.639862083	5.110448925	-2.285808738	6.257319614	-3.959670529	1.74x10^-3	2.75x10^-2	-1.247423308
HDC	6.856677628	8.754387417	7.802800667	9.252533750	7.209426062	6.985709833	5.944570566	5.611245917	7.068077417	6.233050954	6.000620255	5.569536123	-1.739072354	6.940719716	-3.958466461	1.74x10^-3	2.76x10^-2	-1.249618499
C21orf7	7.262852356	5.162333583	5.647968833	4.880523417	2.953866636	5.004975860	6.549969042	7.632664853	8.187950802	7.529714715	6.933094176	7.547308583	2.244696914	6.274435238	3.956307145	1.75x10^-3	2.76x10^-2	-1.253555508
NFYA	8.359648083	7.651828413	7.273521239	7.773150333	7.571667833	7.299905567	8.811227787	8.911134833	8.638758818	8.290806372	8.107443667	8.988892667	0.969757112	8.139832135	3.955876135	1.75x10^-3	2.76x10^-2	-1.254341394
MAN2C1	7.992646563	7.688267500	8.085806833	7.417863983	8.281325324	7.583529417	6.339302796	6.179347140	6.838500585	6.799128223	6.869099833	7.650850110	-1.062201822	7.310472359	-3.955503352	1.75x10^-3	2.76x10^-2	-1.255021122
UNC119B	8.888941833	7.164156785	6.435386833	7.430684333	7.578976917	7.596557290	9.750946113	9.316314091	8.867177706	8.942967083	8.600657719	8.432431142	1.469298311	8.250433154	3.952876184	1.76x10^-3	2.77x10^-2	-1.259811750
LOC375196	6.248455054	6.091127406	6.390080167	6.644356530	5.397867046	4.550221861	3.916808967	4.448765417	5.279749750	3.687844923	3.770300636	1.875034558	-2.057267302	4.858384360	-3.952199928	1.76x10^-3	2.77x10^-2	-1.261044979
MFF	12.148695830	12.214605830	12.207859170	12.355680920	12.262483400	12.391750270	13.001960570	13.360563220	13.249024170	12.761490830	13.321291670	12.536152500	0.774901255	12.650963200	3.952006564	1.76x10^-3	2.77x10^-2	-1.261397606
SDCCAG10	10.633223870	10.451795650	10.411786100	10.483094880	10.293907760	10.768183810	11.169652450	11.326052500	11.152954400	11.062510000	11.038378330	11.247208730	0.659127394	10.836562370	3.951781999	1.76x10^-3	2.77x10^-2	-1.261807136
HMGB2	12.717897680	12.524903420	12.202992500	11.999174170	12.047671240	12.759158330	14.348062500	15.385895830	14.090034170	13.451314740	13.076896670	12.997956160	1.516393789	13.133496450	3.951450720	1.77x10^-3	2.77x10^-2	-1.262411282
SPATS2	5.221108167	5.218072210	5.694834539	5.141766000	4.257397056	4.783141268	6.464329917	6.415755123	6.067718167	6.369889833	5.647968833	5.696622167	1.057660800	5.581550273	3.950759495	1.77x10^-3	2.78x10^-2	-1.263671880
ACMSD	11.719210860	11.692567340	12.903131820	12.523552950	12.320213050	11.160143400	6.884842741	8.142835998	10.781134850	8.170397541	9.083815001	11.897341160	-2.893075353	10.606598890	-3.949536481	1.77x10^-3	2.78x10^-2	-1.265902392
UPK3B	8.911134833	9.314456356	10.397496750	10.627563750	10.512963330	9.709902457	7.344452563	8.167431583	8.859986417	8.722837167	8.876866872	8.731607083	-1.461722632	9.181391597	-3.949491785	1.77x10^-3	2.78x10^-2	-1.265983909
FBXO32	6.711496333	7.210951002	5.119774333	5.533316250	5.213631083	6.195693327	7.861382583	8.163940667	6.934013468	7.773150333	7.078183526	7.335811667	1.526936652	6.760945381	3.948065204	1.78x10^-3	2.78x10^-2	-1.268585822
CCDC120	9.264608735	10.109862330	10.256431580	10.391794120	10.303500920	9.826400167	7.626332105	7.995560490	8.665350583	8.839165083	9.453376833	9.411527250	-1.360214251	9.345325850	-3.947747615	1.78x10^-3	2.78x10^-2	-1.269165084
ZCCHC2	8.499565347	8.558107992	8.061424333	8.450962870	8.579232811	8.125636903	7.497257583	7.720763622	7.459471083	7.978329250	7.057368668	7.697316667	-0.810737231	7.973786427	-3.947339424	1.78x10^-3	2.78x10^-2	-1.269909611
RBP5	11.527937500	11.610795000	12.936090830	12.444966670	12.283256670	11.098049760	7.615804583	8.094147500	9.972668000	9.477538833	9.355576686	12.100064790	-2.547549340	10.709741400	-3.947333434	1.78x10^-3	2.78x10^-2	-1.269920538
LOC644950	14.316076670	14.279058900	14.112301140	14.067545130	14.441031940	14.570055000	15.590557500	14.836946130	14.629980090	15.979025980	15.084843230	15.779599160	1.019147219	14.807251740	3.946490846	1.78x10^-3	2.78x10^-2	-1.271457427
PLG	16.822011070	16.950034470	16.403683330	16.926862500	16.937309100	16.659890430	11.748342950	15.574216200	14.594578780	15.001294890	14.906948580	15.712556670	-2.193642137	15.686477410	-3.944574637	1.79x10^-3	2.79x10^-2	-1.274952801
ATP6V1C1	8.770536500	9.167621167	10.153004080	10.012753920	8.849996500	9.321958167	10.218176830	10.439418670	10.587451580	10.651616850	10.206506670	10.533832420	1.060188780	9.909406112	3.942780575	1.79x10^-3	2.80x10^-2	-1.278225598
C12orf50	1.512987424	0.177961250	1.027909096	2.042103875	1.131250975	1.002219728	1.256781439	2.623973167	3.260541062	3.102659274	3.866044750	2.697349597	1.652152823	1.975148470	3.941816887	1.80x10^-3	2.80x10^-2	-1.279983689
MGC27348	13.986053330	13.169020990	14.009343360	13.768728190	13.800297710	13.785961670	14.788584040	15.507993950	14.761021670	14.641216670	14.589346970	14.112301140	0.980176530	14.243322470	3.941628816	1.80x10^-3	2.80x10^-2	-1.280326801
SACS	8.288229031	7.488527667	6.682200333	6.678049000	7.045881625	7.641854583	10.226659250	9.835739083	8.534611000	7.970499250	8.321015060	8.939580405	1.667226968	8.137737191	3.939700010	1.80x10^-3	2.81x10^-2	-1.283845812
C2orf30	9.730276917	9.484663913	10.456400830	10.229521170	9.737148417	10.146946690	11.060942700	11.637804170	10.945026560	10.778976670	10.364925640	10.944452730	0.991195087	10.459757200	3.939164060	1.81x10^-3	2.81x10^-2	-1.284823673
TXNDC11	11.052577600	11.515826670	10.344105290	10.882941050	11.161939170	10.919476670	10.362267830	10.134457920	9.911877083	9.450152667	10.277348480	10.122228560	-0.936422316	10.511266580	-3.938839918	1.81x10^-3	2.81x10^-2	-1.285415090
CNTD1	1.164510250	0.177961250	1.027909096	2.742232833	3.436275287	0.000000000	5.102035336	2.993394563	3.284733443	4.228696750	4.399166833	3.031845167	2.415163896	2.632396734	3.937964948	1.81x10^-3	2.81x10^-2	-1.287011569
CCT4	14.384721770	14.231930020	14.308383330	14.530059470	14.319010830	14.960889690	15.740825080	15.899503330	14.992747750	15.512782500	14.818650000	15.331407500	0.926820174	14.919242610	3.937213450	1.81x10^-3	2.81x10^-2	-1.288382800
SERF1B	10.817791080	10.875084170	11.263024260	10.991805430	10.921546670	11.049415830	12.127264610	12.473522500	11.883736090	11.409347500	11.623584170	11.537777810	0.856094205	11.414491680	3.937118864	1.81x10^-3	2.81x10^-2	-1.288555390
AGPAT9	9.460890267	11.237416840	9.902257168	10.758098170	9.996537454	9.608907428	7.787269511	7.605440800	8.885268248	9.015706270	8.594762580	9.573526125	-1.583688965	9.368840072	-3.936282935	1.82x10^-3	2.81x10^-2	-1.290080732
MYB	5.621093542	6.177752000	3.904380682	4.437804500	5.012615696	6.109608250	9.993424500	8.542817750	7.489150376	6.784440248	8.467084667	5.662350167	2.612668840	6.516876865	3.935847769	1.82x10^-3	2.81x10^-2	-1.290874810
RAB3GAP2	10.575136500	10.551179670	10.191710470	10.372485940	10.426934350	10.547728420	11.498448330	11.433935930	11.264253330	10.837346080	11.126524770	10.917590440	0.735487255	10.811939520	3.933681166	1.82x10^-3	2.82x10^-2	-1.294828560
ZNF30	7.532092917	6.422074250	7.220497750	6.689519053	6.801750833	7.192136667	8.799725000	8.231497633	8.054498667	7.590433048	7.422523333	8.469234843	1.118306842	7.535498666	3.933637739	1.83x10^-3	2.82x10^-2	-1.294907811
LOC645251	9.013393000	8.873069417	7.225467167	8.277621987	8.529050250	8.161853398	9.703184751	10.013539080	9.487649583	9.414807774	10.416531580	8.934190833	1.314908065	9.004196569	3.932221338	1.83x10^-3	2.82x10^-2	-1.297492726
SLC16A2	11.359004250	11.431187500	11.481042040	11.540726850	11.917663330	11.080610000	9.060744500	9.089085179	10.450842480	9.612144998	10.453560130	11.330370000	-1.468914448	10.733915110	-3.931934281	1.83x10^-3	2.82x10^-2	-1.298016618
AFG3L2	8.641917731	9.076972758	8.788514037	9.135722337	8.692847183	8.676433901	8.118467295	8.180226145	8.189051929	7.974698413	8.387947706	7.899626987	-0.710398245	8.480202202	-3.931745579	1.83x10^-3	2.82x10^-2	-1.298361012
ACADM	12.812790250	12.997956160	13.768728190	13.156640160	12.812790250	12.532067260	11.386601900	11.110141310	11.749130800	11.331673190	10.522868270	13.060169800	-1.486731168	12.270129790	-3.930930537	1.83x10^-3	2.82x10^-2	-1.299848543
SLC41A1	6.793583700	6.550980258	5.978491486	5.875515355	5.473283333	6.085070003	8.225916338	7.443885746	7.113273250	7.361719750	7.510615066	6.446227750	1.224118961	6.738213503	3.927732867	1.85x10^-3	2.84x10^-2	-1.305685043
EMG1	12.197323100	11.659685830	12.141236350	12.323499170	11.856612600	11.972787500	13.603734970	13.988985000	12.506266120	13.194007780	12.838492390	12.561840740	1.090363741	12.570372630	3.926653651	1.85x10^-3	2.84x10^-2	-1.307655025
GPR125	10.928651330	11.767817500	11.105361810	11.581874190	11.776555100	10.162470340	9.310776485	9.323242167	11.082499170	8.430711398	9.952284167	8.293768333	-1.821574760	10.309667670	-3.924732916	1.86x10^-3	2.85x10^-2	-1.311161298
C1orf85	11.331087760	10.894075500	11.426568330	11.070874910	11.692567340	11.702480880	11.908410830	12.383273930	11.837257500	12.152045000	12.479209170	12.626191670	0.878122229	11.792003570	3.924519163	1.86x10^-3	2.85x10^-2	-1.311551516
ARHGAP10	8.079876321	7.095234486	9.432996640	9.159260294	8.484925886	7.601173754	7.548744680	6.459804189	7.248494237	6.384730167	5.426012207	5.637306318	-1.858062597	7.379879932	-3.923886900	1.86x10^-3	2.85x10^-2	-1.312705766
TK2	9.302350417	9.813585750	9.237313953	9.615736167	9.424230673	9.249778500	8.427624000	7.595890667	8.750482917	7.902593917	8.984610500	8.778555083	-1.033873063	8.923562712	-3.923811263	1.86x10^-3	2.85x10^-2	-1.312843851
DDX1	13.723884270	13.458110080	13.516598080	13.755465000	13.463119170	13.520898330	14.424812600	15.151515830	14.179014810	14.179014810	14.042479200	14.514578330	0.842223440	13.994124210	3.923286949	1.86x10^-3	2.85x10^-2	-1.313801054
LOC727997	15.801830830	14.720860210	15.933068330	15.582272500	14.992747750	15.582272500	16.926862500	16.652505830	16.363463330	17.209380850	15.859337500	16.363463330	1.126993538	15.999005460	3.922044002	1.86x10^-3	2.85x10^-2	-1.316070291
RORA	10.346454920	11.206051210	11.234178170	11.105835000	10.842879000	10.146367680	8.583797000	9.862840323	9.510976769	9.744618487	8.688832948	10.411786100	-1.346485725	10.140384800	-3.922026981	1.86x10^-3	2.85x10^-2	-1.316101368
EXOSC1	11.539753330	11.309056670	11.420065800	11.195620830	11.178054460	11.392723310	12.117020000	12.118003140	11.772426280	12.752441160	11.981231690	11.989394170	0.782540338	11.730482570	3.920995724	1.87x10^-3	2.85x10^-2	-1.317984204
LPL	6.030953250	7.217308667	6.980892237	2.436475833	2.505123250	5.970948778	8.722837167	7.841850167	10.894831670	9.119173833	9.549077333	7.084088164	3.678359386	7.029463362	3.920870497	1.87x10^-3	2.85x10^-2	-1.318212845
HIST1H2AL	3.825937763	3.186136583	3.382004667	3.983450833	4.326119083	5.189401253	6.453489076	6.934013468	5.233624500	6.262883810	4.492059667	5.191659833	1.779113362	4.871731711	3.920250934	1.87x10^-3	2.85x10^-2	-1.319344065
TMEM132A	8.249354262	6.479991750	5.949854417	4.947221417	5.471788983	7.811969083	9.837733331	8.218993083	8.252443167	9.676411083	9.254962661	7.671946246	2.333718276	7.651889124	3.919520811	1.87x10^-3	2.85x10^-2	-1.320677181
ADNP	10.575716330	9.947341647	9.985728211	10.101816730	10.219086820	10.331172830	11.692025010	11.018967400	11.137888300	10.849152970	10.657072430	10.894075500	0.848053172	10.617503680	3.919508767	1.87x10^-3	2.85x10^-2	-1.320699173
RPS23	16.963900180	16.474262010	16.972379490	16.694060830	16.644134170	17.033241410	17.283391740	17.616495800	17.413122360	17.569848110	17.413122360	17.847829320	0.726971932	17.160482320	3.918100325	1.88x10^-3	2.86x10^-2	-1.323270922
TXNDC9	10.191233100	10.010051670	11.633502500	11.005121330	10.431225820	10.751976670	11.795318330	12.107413160	11.929854260	12.059000000	11.072454170	12.149777500	1.181784390	11.261410710	3.917238079	1.88x10^-3	2.86x10^-2	-1.324845408
SERHL2	8.485608115	8.988315500	9.045096000	8.493470556	8.286668417	8.997260062	7.380912408	7.953155977	8.072760082	7.947921380	7.812622083	8.083215712	-0.840971835	8.295583858	-3.916837791	1.88x10^-3	2.86x10^-2	-1.325576361
RBBP7	13.065850000	12.842843330	12.706097130	12.885027500	12.769962620	13.194007780	14.384721770	13.797040000	13.678802500	13.568243330	13.338456300	13.610458970	0.818989086	13.320125940	3.916799136	1.88x10^-3	2.86x10^-2	-1.325646950
CENPN	7.926196250	8.047231205	7.963901583	8.360957333	7.901306833	8.047743250	9.525191000	10.631791670	8.494520250	9.539878431	8.389763333	10.069846750	1.400609163	8.741527324	3.916483552	1.88x10^-3	2.86x10^-2	-1.326223237
DNAH6	4.986237513	4.441613250	4.117286329	2.824084190	3.828688333	2.843392333	2.841712417	1.663946550	0.249255292	0.102078833	1.657688742	3.061270750	-2.244224894	2.718104544	-3.915651935	1.89x10^-3	2.86x10^-2	-1.327741884
HIST1H3F	7.319045184	7.407157583	7.386804634	6.944293979	7.440247417	7.304121250	8.806209247	8.050611467	7.586913000	8.517946390	8.047231205	9.282123352	1.081560769	7.841058726	3.915552645	1.89x10^-3	2.86x10^-2	-1.327923204
CFHR4	12.694618330	12.622549170	15.222288330	12.827869430	12.610020000	12.286595000	8.758446750	9.820821566	13.064263280	9.193192500	8.020425667	10.979408700	-3.071230300	11.508374890	-3.915056132	1.89x10^-3	2.86x10^-2	-1.328829931
ITGB3BP	7.712765117	7.613397750	7.554118167	8.323942250	7.193077525	8.649115667	9.014772986	9.184912500	8.740019200	9.392821417	8.418272083	10.276167820	1.330091588	8.506115206	3.914278711	1.89x10^-3	2.86x10^-2	-1.330249681
ALDH2	16.685385380	16.793626500	16.736707170	16.685385380	16.746574730	16.259149250	15.416103600	12.976678310	14.823410760	14.175931630	15.507993950	16.295434910	-1.785212542	15.758531800	-3.912453697	1.90x10^-3	2.86x10^-2	-1.333582738
HNRNPA3	11.484995000	11.524889090	11.225726670	11.234178170	11.255813330	11.406703330	13.143336390	13.190042500	12.103498990	12.501074170	11.577210840	12.163920000	1.091129549	11.900949040	3.912369061	1.90x10^-3	2.86x10^-2	-1.333737315
LOC643779	14.417119130	13.358732150	14.185225000	13.906720830	13.898801380	13.700778690	15.390884170	15.308929290	15.142731530	15.397553910	14.526078330	14.172090000	1.078481673	14.450470370	3.912262340	1.90x10^-3	2.86x10^-2	-1.333932229
tcag7.873	13.044241670	12.975477500	13.034332500	13.326022900	13.042681450	12.994441560	13.707856670	14.373818110	13.650379170	13.811195830	14.302301130	13.446996670	0.812558332	13.475812100	3.911267637	1.90x10^-3	2.87x10^-2	-1.335748981
TMEM192	8.975710151	8.918256207	9.598556767	8.867565333	8.557320333	8.447217750	7.413246417	7.784588817	8.084909500	7.452746167	6.080430167	8.265303083	-1.380567065	8.203820891	-3.910398301	1.91x10^-3	2.87x10^-2	-1.337336813
WDR72	9.507644302	8.383567667	9.903057052	9.999578500	9.279702250	7.750409667	8.136428665	8.019987500	7.683501167	5.607747417	5.105365566	6.226693157	-2.340705994	7.966973576	-3.910171986	1.91x10^-3	2.87x10^-2	-1.337750183
SLC17A8	3.630678500	4.394543739	5.861270167	5.866168194	4.112610167	3.159297991	-0.980459491	0.141257917	-0.767266539	4.139683083	3.220010083	0.132998375	-3.523057555	2.742566015	-3.909500319	1.91x10^-3	2.87x10^-2	-1.338977019
DNAJA3	11.295419170	12.039509170	11.979762080	11.785961670	11.838105830	11.917663330	10.753019170	11.211304950	10.501833580	10.903501670	10.593765180	11.529475080	-0.893920270	11.362443410	-3.908006356	1.91x10^-3	2.88x10^-2	-1.341705930
MSRB3	5.890798210	5.128390750	5.068300673	5.190434500	4.516333333	6.387262799	6.142880083	7.444926917	7.285646250	6.958494914	6.321800093	6.269383000	1.373601832	6.050387627	3.906716979	1.92x10^-3	2.88x10^-2	-1.344061260
OLA1	9.323242167	10.353328920	9.996537454	9.598225451	9.805423979	9.889850052	10.806948330	11.677156670	10.247271610	10.538702670	11.327627050	10.789380830	1.070079856	10.362807930	3.906546130	1.92x10^-3	2.88x10^-2	-1.344373362
PHYH	13.759202520	14.009343360	14.191391670	14.101645830	13.543991670	13.709080000	10.773447680	10.824803240	12.458203330	13.695760000	12.675948330	12.352559500	-1.755655491	13.007948090	-3.904920445	1.92x10^-3	2.89x10^-2	-1.347343206
FAM110C	10.502579060	11.123637720	10.453097420	11.423628330	11.369143330	10.896669170	6.631021333	4.576718885	9.351907372	8.918778583	10.211839000	7.829695167	-3.041465780	9.440726280	-3.903647621	1.93x10^-3	2.89x10^-2	-1.349668556
LOC100133315	13.931403920	13.976558710	14.161611670	14.551130000	14.185225000	13.179262500	12.622549170	11.731834170	12.575615000	12.742718220	13.856215830	12.647195130	-1.301510714	13.346776610	-3.903071781	1.93x10^-3	2.89x10^-2	-1.350720606
STAG3	10.574397230	11.496444170	10.607824280	11.835007580	11.517874020	10.899851670	9.134415250	9.579760583	10.647766670	10.521537000	9.852065968	9.029439833	-1.361068940	10.474698690	-3.901378423	1.94x10^-3	2.90x10^-2	-1.353814470
EPRS	12.150711540	11.917663330	11.422276280	11.593041670	11.393480200	11.768432500	13.854736670	12.739292780	12.603745830	13.070407250	11.917663330	12.989501760	1.154957018	12.285079430	3.901070269	1.94x10^-3	2.90x10^-2	-1.354377504
DSCAM	5.534267667	5.374223830	5.739986250	5.920970833	5.601265750	4.955834500	3.799447833	4.318975667	4.645630791	3.955284333	4.812780000	5.197202167	-1.066204673	4.987989135	-3.900615864	1.94x10^-3	2.90x10^-2	-1.355207770
MGC12966	7.712072559	7.327812924	8.132242858	7.672539750	7.944174446	8.110729333	8.824666250	8.593342289	8.575538333	8.895544583	8.133827066	9.076501243	0.866641316	8.249915970	3.899727393	1.94x10^-3	2.90x10^-2	-1.356831178
STIP1	6.820976917	6.649423300	6.868322061	6.373839685	6.011265667	6.260324356	7.956703250	7.060546417	7.298519750	8.388199083	7.161694833	7.440955417	1.053744461	7.024230895	3.898216791	1.95x10^-3	2.91x10^-2	-1.359591457
SAP130	8.209667833	7.843447976	8.447217750	7.819649336	8.429828500	8.177177937	9.459977750	9.219261417	8.583441475	8.876866872	8.705879250	9.164258417	0.847115975	8.578056209	3.894946738	1.96x10^-3	2.92x10^-2	-1.365567240
MYO1B	11.048932500	11.111191670	11.044777500	11.586559170	10.972960830	10.631325890	9.728062603	9.465328236	9.710468432	9.673351043	9.334798667	11.211304950	-1.212072270	10.459921790	-3.894372602	1.96x10^-3	2.92x10^-2	-1.366616504
C14orf167	10.323060170	8.711165531	10.290152070	8.987011277	10.389194820	9.036855917	8.338798917	8.421421612	8.480798057	7.889399064	7.461232613	8.674514083	-1.411879238	8.916967010	-3.890601107	1.98x10^-3	2.94x10^-2	-1.373509639
SLC1A4	6.953399349	7.112851083	6.386598833	6.920895982	6.555923750	5.958413992	7.422139844	7.829344417	7.530411250	8.131652507	7.793036415	7.106006235	0.987417946	7.141722805	3.889622020	1.98x10^-3	2.95x10^-2	-1.375299259
RPS11	17.159998330	16.589152100	16.890013400	16.707490940	16.685385380	17.159998330	17.736795440	17.996147940	17.847829320	17.762479640	17.514198330	17.147314260	0.802121072	17.266400280	3.889041422	1.98x10^-3	2.95x10^-2	-1.376360532
ACADL	8.362569834	8.540421677	10.130067840	9.372399675	8.651859909	7.480245784	2.134159389	5.249853363	5.475622431	4.889279983	6.823161603	8.354800400	-3.268447925	7.122036824	-3.888654286	1.98x10^-3	2.95x10^-2	-1.377068188
HAO1	13.402731060	13.787596020	14.731719170	14.645585830	14.206379170	14.269501030	9.287970837	10.072143330	12.223261540	12.383273930	10.630100720	14.182868330	-2.710648931	12.818594250	-3.887880716	1.99x10^-3	2.95x10^-2	-1.378482247
COL4A3	4.808685428	5.726873846	5.495291912	6.192902012	6.552959833	5.255090882	2.715781750	4.139683083	4.960526603	4.199921083	4.684244087	2.472503675	-1.809857272	4.767038683	-3.887694808	1.99x10^-3	2.95x10^-2	-1.378822087
IKIP	8.370332833	7.971634167	8.645055417	7.574443219	8.116108471	8.303540045	9.287331921	9.579258567	9.718869083	8.777781667	8.764312132	8.809157464	0.992599447	8.659818749	3.887158232	1.99x10^-3	2.95x10^-2	-1.379802956
CYP2C18	11.296058330	11.555030840	12.475329170	12.434534170	12.383273930	11.035820250	8.303925250	8.223143667	10.307994920	11.088398410	10.937043000	9.809344849	-2.085032767	10.820824730	-3.885141890	2.00x10^-3	2.96x10^-2	-1.383489033
ABHD14B	9.541154596	9.545834748	9.702644175	9.568335185	9.732567469	9.255444448	7.710879243	7.661507808	8.374454770	8.557664093	9.144627792	9.155461575	-1.123564223	8.995881325	-3.883441105	2.00x10^-3	2.96x10^-2	-1.386598441
C6orf153	11.820215830	11.970828950	11.609462500	11.723229170	11.455544170	11.756047500	12.932889820	12.787183720	12.662737650	12.643031670	11.752562330	12.811398210	0.875745881	12.160427630	3.882127011	2.01x10^-3	2.97x10^-2	-1.389001019
CCL20	7.281070250	9.664919978	6.598555083	4.742832833	4.255541250	7.367649500	11.862119850	10.608590450	12.464157500	10.273709210	10.778002740	7.132247143	3.868043000	8.585782983	3.881655665	2.01x10^-3	2.97x10^-2	-1.389862815
CCT3	12.917269770	12.864753450	12.177695790	12.458791250	12.355680920	12.499246670	14.614287500	14.221282850	13.018853330	14.333501670	12.950470000	13.526790000	1.231957919	13.161551930	3.881190043	2.01x10^-3	2.97x10^-2	-1.390714158
ATP6V1F	12.178622140	11.946477500	12.045146670	11.725411670	11.651541670	12.141236350	12.833004550	12.927648330	13.037206670	13.432378330	13.241766690	11.996271670	0.963306709	12.429726020	3.878609269	2.02x10^-3	2.98x10^-2	-1.395433099
CEP170	6.714351114	5.995157333	5.109564083	4.723936312	4.845323583	5.779328591	8.165829875	7.166054083	6.783015833	6.616895015	6.567164569	6.848283713	1.496597012	6.276242009	3.878475034	2.02x10^-3	2.98x10^-2	-1.395678559
CREB3L2	8.149388244	8.062716014	7.982366888	7.511101167	7.754881449	8.342404667	9.062663235	9.472805995	8.980870750	8.816768750	9.571057333	8.101524250	1.033805314	8.484045728	3.877958921	2.02x10^-3	2.98x10^-2	-1.396622325
KIAA1462	9.030461750	7.862949083	7.483764733	7.627945583	6.915598435	8.558542917	9.876547060	9.247806425	10.351032420	8.852702420	11.192775890	8.800543538	1.807024208	8.816722521	3.876590525	2.03x10^-3	2.99x10^-2	-1.399124660
MTHFD1	13.165123330	13.872486640	13.671167500	14.092214430	13.933647500	13.595957500	10.894075500	10.795427850	10.968181670	11.668855000	10.848006670	14.400620830	-2.125904899	12.658813700	-3.875490402	2.03x10^-3	2.99x10^-2	-1.401136501
ANAPC7	6.000930992	5.658490303	6.578293478	5.703600661	5.587295468	5.144573754	7.191919961	7.250008558	6.644546112	7.250448875	6.097439403	6.837872209	1.099841744	6.328784981	3.875155319	2.03x10^-3	2.99x10^-2	-1.401749297
H2BFXP	6.103648250	7.408509917	7.100157333	7.103760333	7.847343732	7.029175500	5.552116151	5.716157417	6.285503000	4.747269333	5.989011167	6.421134500	-1.313567250	6.441982219	-3.874606560	2.04x10^-3	2.99x10^-2	-1.402752874
GJB2	10.864506670	11.370683330	10.246288350	11.406703330	10.642296880	11.140964630	7.909115333	10.101227920	9.669761207	9.470899550	10.396248790	9.000490560	-1.520616638	10.184932210	-3.873640536	2.04x10^-3	2.99x10^-2	-1.404519598
FNDC3A	11.311891670	11.265641300	11.316203560	11.545623320	11.589837780	11.539753330	10.162811580	10.502301980	10.509402880	9.842178923	10.398015680	11.399059170	-0.959196792	10.948560100	-3.873205542	2.04x10^-3	2.99x10^-2	-1.405315161
CLSPN	0.103028333	-1.301000564	1.027909096	0.147304583	0.605142533	1.927216692	6.038959667	5.181357894	0.249255292	3.151595000	3.362079633	4.136151250	3.268299677	2.052416617	3.872751900	2.04x10^-3	2.99x10^-2	-1.406144843
HLTF	9.968370750	9.717551171	10.001290750	10.007703420	10.095232310	10.186883170	11.144200830	11.026284740	10.741901670	10.320803330	11.315201670	10.447017840	0.836396420	10.414370140	3.872522033	2.04x10^-3	2.99x10^-2	-1.406565260
PLCE1	7.414358441	6.508452550	5.615231667	4.972043750	4.115384583	6.232466015	9.011655333	6.398900303	9.628756716	8.304316635	9.949258333	7.280436557	2.619231146	7.119271740	3.871668720	2.05x10^-3	2.99x10^-2	-1.408125958
LTA4H	13.109287500	12.426985830	12.755780830	12.761490830	12.797888970	12.954553330	13.474101550	13.636688060	13.405947190	13.735846670	13.583144870	13.233915000	0.710609339	13.156302550	3.871470503	2.05x10^-3	2.99x10^-2	-1.408488502
PPIL5	6.195471500	5.391676439	6.446227750	5.954529701	5.221905667	5.915717167	7.434264527	7.986002822	7.377624833	7.528142860	5.827103333	7.123415861	1.358504335	6.533506872	3.870132046	2.05x10^-3	3.00x10^-2	-1.410936632
PEX14	11.575190000	11.585520290	11.843875000	11.548526820	12.119037500	11.691488710	10.409637720	10.708460830	10.353328920	10.961904170	10.806948330	11.606829170	-0.919421529	11.267562290	-3.869516973	2.06x10^-3	3.00x10^-2	-1.412061680
ST3GAL6	10.081643470	10.911858850	11.857610830	11.537777810	11.217720000	10.436944920	7.615418500	9.626519667	9.573526125	8.642755833	9.114892184	10.616077840	-1.809060955	10.102728840	-3.868055932	2.06x10^-3	3.01x10^-2	-1.414734208
ADA	10.118143570	9.827621581	9.386885500	9.345446932	9.599100997	10.030858270	11.341644650	11.494164760	11.079104260	10.987698620	10.783095810	9.675212928	1.175477362	10.305748160	3.867623237	2.06x10^-3	3.01x10^-2	-1.415525716
CLTA	12.804111250	12.557928330	12.773678150	12.685930180	12.417192150	12.876845830	13.565859780	13.594176240	13.324625830	13.185719240	13.399404170	13.138870760	0.682161685	13.027028490	3.867552244	2.06x10^-3	3.01x10^-2	-1.415655582
LOC119358	13.374157550	13.010965000	13.276212790	13.033139170	13.228277500	13.799151670	15.960287500	15.293273650	14.191391670	14.104921710	13.944530000	14.274462850	1.341160616	13.957564250	3.866012922	2.07x10^-3	3.01x10^-2	-1.418471492
PF4	6.703841449	7.130036667	7.657363615	7.534868471	7.110386500	6.269383000	6.332485750	6.100089833	4.946239528	5.667546833	6.469166583	5.471788983	-1.236427032	6.449433101	-3.864203582	2.08x10^-3	3.02x10^-2	-1.421781537
ADK	12.623790740	13.136708070	13.565859780	13.388117550	13.177578540	12.870187320	11.035820250	12.095709020	12.397302440	12.196683700	10.855956700	12.562705270	-1.269677435	12.492201610	-3.864201851	2.08x10^-3	3.02x10^-2	-1.421784704
HSPB1	13.354503000	13.226265830	12.887319170	12.806017170	13.204942500	13.561224170	14.802359170	13.625036670	14.122050000	14.751392610	15.222288330	13.599646670	1.180416935	13.763587110	3.863412515	2.08x10^-3	3.02x10^-2	-1.423228794
LOC390595	6.869940917	8.045553661	6.710383968	8.582391917	7.583529417	8.597921045	6.180313833	7.092093211	6.058466583	6.160790667	6.324044167	6.164080083	-1.401655397	7.030792456	-3.863298277	2.08x10^-3	3.02x10^-2	-1.423437797
SLC13A5	11.936790000	12.632307500	11.572431440	12.633432500	12.955707500	11.512509920	6.992961689	11.484278180	9.464810019	10.666820000	9.854690500	10.352056580	-2.404593648	11.004899650	-3.860888709	2.09x10^-3	3.03x10^-2	-1.427846358
HSPC152	13.599646670	13.032121670	13.411253030	13.482231300	13.319731670	13.132232500	14.211487500	14.489308080	13.950420980	14.311375090	13.683212500	13.954754170	0.770556914	13.714814590	3.858292211	2.10x10^-3	3.04x10^-2	-1.432597325
ORC1L	3.164995803	4.896220510	4.902485167	5.329624417	4.320977333	3.634153250	5.701710182	6.158383911	6.126915750	5.733626754	5.814902056	5.144573754	1.405275988	5.077380741	3.857528427	2.10x10^-3	3.04x10^-2	-1.433994944
NIPSNAP1	11.084090000	11.350725830	11.709352970	11.351816670	11.457083330	10.993606670	9.729721667	10.565234260	10.745951340	10.658523250	10.643605280	10.433477640	-0.861693673	10.893599080	-3.856725978	2.11x10^-3	3.05x10^-2	-1.435463353
AIFM1	13.041347750	13.633268000	13.156640160	13.356881230	13.458110080	13.158189750	12.664491960	11.836434700	12.250400970	12.187305980	12.932889820	12.707413060	-0.870916745	12.865281120	-3.856365899	2.11x10^-3	3.05x10^-2	-1.436122278
TAF1D	10.238434080	10.434718920	9.952284167	9.886710337	9.689518233	9.998356333	10.551475330	11.357217500	10.548937610	10.906035830	11.120079170	10.683756670	0.827913340	10.447293680	3.855721549	2.11x10^-3	3.05x10^-2	-1.437301423
HSD17B2	14.658869170	14.566435000	13.783385850	14.555046670	14.134694170	14.189631670	10.972342500	12.137962990	13.102543330	13.858380000	13.510308330	11.312907500	-1.832269643	13.398542260	-3.853749791	2.12x10^-3	3.06x10^-2	-1.440909846
GDF2	6.765482167	6.777551872	7.605440800	7.803480493	7.497020667	7.327092476	3.652278833	3.170049000	4.903390435	5.392802083	6.802886488	6.495738917	-2.226487120	6.182767853	-3.853487128	2.12x10^-3	3.06x10^-2	-1.441390551
ZNHIT2	8.426244167	8.454218750	9.167161417	9.036490333	10.109517930	9.182431083	7.264734833	7.317492833	7.390974083	7.578605854	8.540788750	8.405218391	-1.313041489	8.406156535	-3.851559070	2.13x10^-3	3.06x10^-2	-1.444919259
ABHD6	12.493688020	12.722528090	12.158845150	13.345989690	13.279062120	12.920574680	9.065443553	9.724904893	11.018512110	11.114535230	12.107413160	12.154248740	-1.955938344	11.842145450	-3.849630356	2.13x10^-3	3.07x10^-2	-1.448449391
LOC200810	8.390837167	8.971846917	8.444837583	8.709156500	8.628284615	8.733138750	9.536347418	9.438779583	9.149989083	9.551555583	10.645321060	9.416426110	0.976719550	9.134710030	3.847405645	2.14x10^-3	3.08x10^-2	-1.452521562
LAMA4	9.678698167	8.534250841	9.362470360	8.713805417	9.297086464	9.108565417	9.673351043	9.954888928	10.617797000	10.417648080	10.773447680	9.678698167	1.070159039	9.650892297	3.847009854	2.14x10^-3	3.08x10^-2	-1.453246060
TBX6	7.184754124	7.347991917	8.092319068	8.156226500	9.967309883	8.968218337	5.219210111	5.770120833	5.691794918	5.652691126	7.498078055	7.379578704	-2.084224347	7.244024465	-3.845817431	2.15x10^-3	3.09x10^-2	-1.455428853
KCNN2	9.428976864	8.378180917	12.152045000	11.684668330	11.878725000	8.147713583	7.263568651	7.466535916	7.990207000	7.735871083	7.806002500	7.390974083	-2.669525077	8.943622411	-3.845792912	2.15x10^-3	3.09x10^-2	-1.455473739
SLC25A41	4.355241583	4.973432167	4.448765417	3.742234064	4.207696833	3.320385017	1.537833850	2.566702917	0.249255292	3.911765500	1.703236535	2.892536667	-2.031070720	3.159090487	-3.842796562	2.16x10^-3	3.10x10^-2	-1.460959092
KIF20B	4.987630083	3.406950398	4.791596469	2.402343250	3.205916219	4.273837667	7.251835904	7.361948917	6.152157021	6.895112130	3.722211500	6.216274500	2.421877648	5.055651171	3.842492915	2.16x10^-3	3.10x10^-2	-1.461515001
PPM1G	8.846463655	9.196219417	9.102746000	8.875425417	8.564567025	8.651073752	10.233268850	10.622491080	9.436731417	10.064654490	9.237565334	9.619019041	0.996205825	9.370852123	3.840181262	2.17x10^-3	3.11x10^-2	-1.465747297
EIF3H	14.872041500	14.284000590	14.761021670	14.599998330	14.460725830	14.650682500	15.758678330	15.831213330	15.407817500	15.750891670	15.100002500	14.881151670	0.850214096	15.029852120	3.840066265	2.17x10^-3	3.11x10^-2	-1.465957848
PROP1	9.869322535	11.219125280	11.428887880	11.402604170	10.666360000	10.763074170	8.612261667	9.364358750	10.180130920	9.875590333	10.006983100	9.595242035	-1.285801205	10.248661740	-3.839807218	2.17x10^-3	3.11x10^-2	-1.466432148
TIPRL	10.109517930	10.513402830	10.899118330	10.698096670	10.380427170	10.216863330	11.329418500	11.553303710	11.133033330	11.074269170	10.940759610	11.587705000	0.800177175	10.869659630	3.839091844	2.18x10^-3	3.11x10^-2	-1.467741971
LYPD1	6.130380667	3.997155083	1.027909096	0.147304583	3.875010250	6.834966167	10.629055830	6.745936037	8.996670552	6.970906417	8.830451797	6.412508828	4.428800603	5.883187942	3.839042248	2.18x10^-3	3.11x10^-2	-1.467832781
ZNF184	7.550646083	6.470640500	7.528142860	7.225867417	6.495569333	7.603309121	8.567117728	8.428571167	8.279184553	7.887632322	7.834674328	9.541154596	1.277359896	7.784375834	3.837162098	2.18x10^-3	3.12x10^-2	-1.471275415
LOC441131	12.332612500	12.186441670	12.059893330	11.745247670	11.489753940	12.120108700	13.160990830	13.064263280	12.647195130	13.233915000	12.929507630	12.245158380	0.891162075	12.434590670	3.837152552	2.18x10^-3	3.12x10^-2	-1.471292895
LAMC3	10.853438330	9.779269417	8.934845703	9.472342922	9.081602586	10.976322580	8.062716014	7.198986228	8.333550209	8.514573126	9.026146976	8.382930927	-1.596486343	9.051393751	-3.833694986	2.20x10^-3	3.13x10^-2	-1.477624386
COL5A2	9.633145667	9.000490560	8.091084833	8.895544583	9.280169583	9.060309500	10.789380830	10.637980790	11.053871670	11.023021370	11.009774170	8.747850083	1.550189030	9.768551969	3.831490198	2.21x10^-3	3.14x10^-2	-1.481662153
PQLC1	12.488658330	12.618652630	11.972787500	12.339904170	12.719995000	11.962217910	10.491920000	10.997788330	11.234541670	11.999174170	11.836434700	11.149695000	-1.065443610	11.817647450	-3.831169676	2.21x10^-3	3.14x10^-2	-1.482249169
RPL7AP11	13.541103460	12.693703330	13.901026470	13.177578540	13.256370000	13.559620830	14.206379170	14.690260830	14.538111440	13.789232500	14.363901880	14.114348330	0.928805253	13.819303070	3.830492558	2.21x10^-3	3.14x10^-2	-1.483489287
MTCH1	12.218337160	12.053106670	12.300884170	12.245893330	12.178622140	12.468060790	12.763277190	12.863086870	12.812790250	13.244617500	12.852132500	13.715675800	0.797779306	12.643040360	3.830288402	2.21x10^-3	3.14x10^-2	-1.483863197
RNF144A	3.082468542	0.177961250	1.027909096	0.147304583	0.624856423	0.182577583	1.087511175	4.299780217	2.908389000	3.148548500	4.695563698	5.165934702	2.677108302	2.212400397	3.828626975	2.22x10^-3	3.15x10^-2	-1.486906173
GLRXL	11.071819170	12.294326670	11.973501010	11.790847100	11.367901670	11.006948160	9.625440708	9.782987301	10.672332500	10.460361500	10.660489890	11.060306230	-1.207237606	10.980605160	-3.828383581	2.22x10^-3	3.15x10^-2	-1.487351973
MRO	6.318394910	6.571081750	8.546537667	6.156677500	6.187884250	7.133606530	5.335462389	5.202537398	5.473033250	5.686137333	4.271951500	5.512735938	-1.572054133	6.033003368	-3.828203283	2.22x10^-3	3.15x10^-2	-1.487682209
LSM4	10.789822500	10.750149170	11.046309170	11.048144180	10.844621620	11.203581670	12.260540840	11.629042710	11.439493330	11.932370000	11.598477060	11.440949100	0.769707457	11.331958450	3.828149219	2.22x10^-3	3.15x10^-2	-1.487781234
PLA2G5	9.832881667	9.729721667	9.788803583	9.894383169	8.787164917	10.691647500	7.791616667	8.417312657	9.280169583	8.715569176	8.298925167	8.783402500	-1.239601125	9.167633188	-3.827424353	2.22x10^-3	3.15x10^-2	-1.489108926
SEC11C	13.590170070	14.016340000	14.544720000	14.189631670	14.298995000	13.877945000	14.829526870	14.765550830	15.161145000	15.553156330	14.501587500	15.100002500	0.898861218	14.535730900	3.825558283	2.23x10^-3	3.16x10^-2	-1.492527033
MRPL46	12.766509170	12.732931670	13.254858870	13.094122500	12.907611670	12.717897680	10.956210340	11.622735830	12.055187100	12.261441000	11.289842150	12.672907840	-1.102601214	12.361021320	-3.824771506	2.23x10^-3	3.16x10^-2	-1.493968244
LOC200383	7.567965333	7.088964838	7.741837250	6.532318000	7.129143667	6.566734000	5.749385333	6.279856333	5.461782833	5.872171283	5.151354121	6.804242597	-1.218028431	6.495479632	-3.824500972	2.24x10^-3	3.16x10^-2	-1.494463813
SEPX1	12.719995000	12.658172050	12.955707500	12.825804170	12.819875830	12.076620830	10.937914750	10.957833330	11.491547720	11.366134170	10.875084170	12.846910000	-1.263458542	12.044299960	-3.822674221	2.24x10^-3	3.17x10^-2	-1.497810200
LOC100129424	14.434768960	13.749258330	14.570055000	14.090034170	14.191391670	14.431261670	14.947839800	15.183721670	15.049327500	14.963324170	14.683255000	15.151515830	0.752035696	14.620479480	3.821665903	2.25x10^-3	3.17x10^-2	-1.499657398
FABP5	10.166504420	9.266414583	10.332309060	8.586580176	8.155913095	10.175217500	11.587705000	13.095866670	12.912885000	12.275835850	11.272783740	9.484663913	2.324466890	10.609389920	3.821417562	2.25x10^-3	3.17x10^-2	-1.500112356
LOC100130233	12.894254430	12.379114920	13.136708070	12.811398210	12.437963330	12.885027500	13.411253030	14.213535830	13.529635830	13.687112500	13.113822500	13.868217500	0.879851790	13.197336970	3.820784305	2.25x10^-3	3.17x10^-2	-1.501272496
TP53TG3	7.989153766	8.167056750	9.418046952	8.197401250	9.480325500	8.583797000	7.674243767	7.887243417	7.483764733	7.219542151	7.431109348	7.377961083	-1.126986120	8.075803810	-3.818357872	2.26x10^-3	3.18x10^-2	-1.505717979
LOC729684	9.426530417	8.993019231	9.624990333	9.329310167	9.694309500	9.339880264	10.219427920	10.716738170	10.110437560	10.207636170	10.851235670	9.677854824	0.895881732	9.849280851	3.818300845	2.26x10^-3	3.18x10^-2	-1.505822463
LAIR2	5.126089191	6.013445991	4.624589167	3.970618250	4.902485167	3.743578667	7.982637196	8.572243167	8.834408083	8.124809112	5.671069294	4.906830538	2.618531826	6.039400318	3.817628048	2.26x10^-3	3.18x10^-2	-1.507055159
TUBE1	8.604107356	7.974698413	10.877301320	10.246288350	9.788438583	8.808287351	7.237511955	7.802504785	8.028912888	7.353210720	7.477919732	8.123133010	-1.712654715	8.526859539	-3.817091799	2.27x10^-3	3.19x10^-2	-1.508037690
RPS7	16.369572810	15.936870830	16.004572890	16.418977810	16.111219210	16.523278330	16.963900180	17.483762880	16.904734040	16.644134170	17.147314260	16.864709570	0.774010535	16.614420580	3.816653041	2.27x10^-3	3.19x10^-2	-1.508841608
CLTC	13.579173910	13.254858870	13.160990830	13.514133330	13.152072500	13.546614700	14.411908330	14.266775000	14.284000590	14.025840270	13.532047850	14.489308080	0.800339330	13.768143690	3.816142857	2.27x10^-3	3.19x10^-2	-1.509776410
PKM2	8.258531167	7.595890667	7.758411250	7.599937250	8.002488917	8.089401167	9.749913608	9.142744333	8.914089667	9.585900073	8.671130000	7.992974417	1.125348614	8.446784376	3.815542045	2.27x10^-3	3.19x10^-2	-1.510877287
TRAPPC4	10.557207420	10.553753840	10.529993470	10.579570750	10.016551330	10.646199170	11.758730830	11.132023060	11.312907500	11.305639170	12.038639170	10.773960000	0.906437291	10.933764640	3.813700244	2.28x10^-3	3.20x10^-2	-1.514252172
ASAP2	7.543556941	6.899284103	6.147631606	6.884467135	5.609372380	7.780870174	8.691196633	9.674133723	8.332592526	8.085368741	7.282829733	9.375512807	1.762741971	7.692234708	3.813291965	2.28x10^-3	3.20x10^-2	-1.515000322
PXMP2	12.506266120	12.264927980	13.904950360	13.826692500	13.345989690	12.545425830	9.102301366	10.764552600	11.683944170	11.036739170	10.989925830	12.728620830	-2.014694753	12.058361370	-3.810736885	2.29x10^-3	3.21x10^-2	-1.519682577
AMT	10.612532130	10.484609390	11.280783640	10.903188790	11.100132740	10.277348480	8.072281847	9.430407668	9.539878431	9.899419083	8.916916291	10.472544500	-1.387857891	10.082503580	-3.810431091	2.29x10^-3	3.21x10^-2	-1.520242978
NOL12	7.473114917	7.029175500	7.766078538	6.759505035	6.975497290	6.922345106	8.221308038	7.677437333	8.034447766	7.822935500	7.997466167	8.145654053	0.828922079	7.568747104	3.808553595	2.30x10^-3	3.22x10^-2	-1.523683803
LOC388401	15.257157500	14.266775000	15.740825080	15.129437540	14.868004330	15.133164100	16.184263600	16.315169170	16.203705000	16.498569070	15.763967780	15.529077890	1.016564825	15.574176340	3.808128058	2.30x10^-3	3.22x10^-2	-1.524463698
CEBPE	9.071155583	9.543725078	9.997145667	9.569380667	10.107525430	9.327159333	7.694423581	7.954882417	8.313183417	8.832277394	8.528327687	9.373200750	-1.153299419	9.026032250	-3.806227236	2.31x10^-3	3.23x10^-2	-1.527947515
HIATL1	8.543950750	8.312243928	7.841850167	7.923392761	7.887632322	8.627078000	9.382163080	9.021025063	8.887971667	8.732083167	8.971099000	8.982470417	0.806777411	8.592746693	3.805584084	2.32x10^-3	3.23x10^-2	-1.529126325
MRPL34	12.951638330	12.868361670	13.097224170	12.963115000	13.052014170	12.976678310	12.053106670	11.917663330	12.173990580	12.265957940	12.088314040	12.895150460	-0.752474771	12.608601220	-3.803596513	2.32x10^-3	3.24x10^-2	-1.532769415
FTO	9.511517005	9.456747500	9.943162500	9.798733007	10.618531060	9.719322917	8.934585326	8.967156000	8.842248917	8.562846583	8.543131000	9.503059373	-0.949164464	9.366753432	-3.802479577	2.33x10^-3	3.24x10^-2	-1.534816782
XRCC6	13.967162500	13.948342870	13.840937980	13.822753330	13.743063330	13.718192190	15.356938170	14.574587500	14.720860210	15.078143820	14.281621670	14.187874170	0.859928887	14.270039810	3.802474879	2.33x10^-3	3.24x10^-2	-1.534825394
ART1	7.942934367	9.282839947	9.836332687	9.588234983	8.862801866	8.551628792	5.140530803	7.792041111	7.811654822	7.536858804	7.706949910	7.148800507	-1.821322781	8.100134050	-3.801943860	2.33x10^-3	3.24x10^-2	-1.535798786
LOC285216	4.540101333	4.717508419	3.652278833	4.749946843	3.303508098	4.913999583	6.674529917	6.714129500	6.657579735	6.273272100	5.701126167	4.221684667	1.727496496	5.176638766	3.800861554	2.34x10^-3	3.24x10^-2	-1.537782770
SCG5	8.936629000	8.215238254	9.231748917	9.880691479	9.857208833	8.542364215	6.366576417	7.669340461	8.503888083	8.040672667	7.710566368	6.170485567	-1.700391856	8.260450855	-3.800252784	2.34x10^-3	3.24x10^-2	-1.538898740
TMEM56	9.399702000	9.630815333	9.894908583	9.216518333	9.138169333	9.273838192	6.708702392	7.758411250	8.051689083	7.984687083	6.912604850	9.605026663	-1.588805076	8.631256091	-3.800102167	2.34x10^-3	3.24x10^-2	-1.539174849
LOC728763	5.864935671	6.160047753	6.529045250	6.420222000	7.104406750	5.493017915	4.111943417	6.197791417	5.235772742	4.399166833	4.280038333	4.650908667	-1.449342322	5.537274729	-3.799950890	2.34x10^-3	3.24x10^-2	-1.539452167
DNAJB3	6.490369750	6.128867917	7.185256167	7.024445610	5.155693750	6.072330000	4.070996417	4.727283833	5.319277250	4.772545832	2.363613205	5.261608422	-1.923606372	5.381024013	-3.799670973	2.34x10^-3	3.24x10^-2	-1.539965309
SORD	14.495685830	14.540821060	14.928061490	14.434768960	14.770141670	14.294696670	11.633502500	11.883736090	13.008695830	12.700385830	12.516520830	15.009892500	-1.785240348	13.684742440	-3.796357915	2.36x10^-3	3.26x10^-2	-1.546039111
UGP2	13.854736670	13.606414610	15.241221420	14.836946130	14.586311670	14.333501670	11.930945830	11.837257500	13.693970830	12.909959310	13.342613120	13.594176240	-1.525034887	13.647337920	-3.794552955	2.36x10^-3	3.27x10^-2	-1.549348376
AKR1A1	12.616484260	12.395450790	12.827869430	12.336943330	12.896644980	12.330236000	11.783542630	10.750689860	11.477931050	11.907194140	11.302764560	12.260540840	-0.986827619	12.073857660	-3.792747473	2.37x10^-3	3.28x10^-2	-1.552658772
MYRIP	10.622491080	10.421190510	10.984670830	11.835691670	10.945026560	9.380774385	6.396056490	6.850401833	8.352837068	7.714632558	6.429854917	11.298604460	-2.857909620	9.269352697	-3.792681097	2.37x10^-3	3.28x10^-2	-1.552780478
ZFR2	7.405727758	7.746251376	9.145348917	9.184669487	9.751295500	8.734360240	5.550771941	6.605397500	4.151363583	6.961504333	7.412429727	7.616178417	-2.278334629	7.522108232	-3.792376533	2.37x10^-3	3.28x10^-2	-1.553338922
NRG1	6.456922999	6.456922999	7.468422090	8.108217917	5.970319005	6.404641648	5.657366814	4.536530500	4.306434866	4.901121917	5.406662167	6.317633455	-1.623282823	5.999266365	-3.789992951	2.38x10^-3	3.29x10^-2	-1.557709591
LOC646346	15.093629610	14.159980200	15.633437380	14.997115000	14.884481670	15.222288330	15.775306670	16.175598330	15.893150000	16.320476140	15.970527130	15.577419760	0.953590974	15.475284190	3.789406325	2.39x10^-3	3.29x10^-2	-1.558785307
KIAA1627	11.471603260	11.266422030	10.940977500	11.084090000	11.158483330	11.064194170	10.156814600	10.824130290	10.774650830	9.974838619	9.651058583	10.285270150	-0.886501204	10.721044450	-3.789146692	2.39x10^-3	3.29x10^-2	-1.559261409
B4GALT3	9.674133723	9.777372871	9.222248500	9.597562917	9.461395667	9.658197449	11.118957570	10.673912500	10.214755130	10.206918110	10.206110170	10.038007960	0.844625050	9.987464380	3.788181236	2.39x10^-3	3.29x10^-2	-1.561031852
CSF3	6.166810250	6.519128618	6.572820855	6.342943030	7.014126510	5.966911750	4.782304127	4.964822333	4.594369833	4.540101333	6.534374000	5.438786583	-1.287997134	5.786458269	-3.787614630	2.39x10^-3	3.30x10^-2	-1.562070910
TTF2	4.857991194	4.781794965	1.027909096	4.286052667	3.200332083	4.625987557	7.149722500	6.560764642	5.541131299	6.003871833	5.600012667	5.731150914	2.301097716	4.947226785	3.786691884	2.40x10^-3	3.30x10^-2	-1.563763104
TAF1A	7.910564750	7.185004932	7.577461833	7.497257583	6.453004297	7.033083917	9.661467874	9.999179606	8.440513250	8.860889596	7.671139524	8.174184250	1.525166131	8.038645951	3.786620450	2.40x10^-3	3.30x10^-2	-1.563894107
CTAGE5	9.932081806	10.733484220	10.553753840	10.587113750	10.710546670	10.099683170	9.437962333	8.812667333	9.318221417	9.890414800	9.898799791	9.684959244	-0.928939755	9.971640697	-3.785587517	2.40x10^-3	3.30x10^-2	-1.565788426
PDCD2L	9.219911500	9.463736917	9.471324189	9.802902750	8.941680904	9.530010733	11.379541670	10.704615830	9.733003061	11.349236670	9.939188833	10.418793420	1.182468748	9.996162206	3.784985292	2.41x10^-3	3.30x10^-2	-1.566892886
NDUFAF1	13.033139170	13.221229170	13.414450860	13.644130050	13.087711670	12.980782020	11.454614850	11.230805000	12.660852260	12.536152500	12.413379170	12.539518330	-1.091020136	12.684730420	-3.784048778	2.41x10^-3	3.31x10^-2	-1.568610457
IVD	7.973518333	8.505871400	9.621811167	9.117135833	8.725962692	8.010336833	4.457492833	6.153125750	7.356497917	6.935753052	7.272982333	7.859908459	-1.986479319	7.665866384	-3.783719750	2.41x10^-3	3.31x10^-2	-1.569213908
CENPQ	8.203915833	7.291865417	9.211891833	8.283316667	7.683789250	9.006420894	9.390642000	10.638715000	10.146367680	9.466157583	9.103641236	11.785961670	1.808380878	9.184390422	3.782587907	2.42x10^-3	3.31x10^-2	-1.571289794
FOXF2	4.801566347	4.380411208	5.763546333	5.902476352	4.380223750	4.480252583	7.683501167	5.697162250	6.653009561	7.316390583	6.606804450	5.518816417	1.627867975	5.765346750	3.782485755	2.42x10^-3	3.31x10^-2	-1.571477152
DNAJC25	9.512718330	9.097682889	10.699518010	10.028398580	9.296679863	8.871505012	6.968187828	8.163280333	8.125038500	6.730343376	6.700477083	9.528714750	-1.881743469	8.643545379	-3.780664907	2.43x10^-3	3.32x10^-2	-1.574816874
ABHD12	9.242738047	8.995021454	9.257244403	9.230962650	9.000105475	9.070002308	9.687579306	10.626458960	9.273337324	10.506451310	9.989439577	10.237737510	0.920821608	9.593089860	3.777994132	2.44x10^-3	3.33x10^-2	-1.579715807
UBE2S	8.904178417	9.317674417	9.483535273	9.370293621	9.227354847	9.163347094	9.867829333	11.293196290	9.859242417	10.440143670	10.101227920	9.884978333	0.996705714	9.742750135	3.775724066	2.45x10^-3	3.34x10^-2	-1.583880018
PROS1	12.761490830	12.626191670	12.302303330	12.644283250	12.711944700	11.896347860	9.339880264	10.840888810	11.982936670	11.396960830	11.583987880	11.032361560	-1.460924271	11.759964800	-3.775587371	2.45x10^-3	3.34x10^-2	-1.584130779
IGSF3	5.723308750	4.999131371	-0.308838848	3.518384333	4.768606857	5.681344833	8.971319874	7.328148000	8.321015060	6.878365331	8.198578583	5.928510419	3.540666662	5.833989547	3.774648664	2.45x10^-3	3.34x10^-2	-1.585852827
ACADSB	12.094322980	11.524452360	12.649283310	12.969918760	12.548316430	11.249764410	8.316169551	10.890182220	9.874121352	10.386571220	9.611740612	11.929854260	-2.004569838	11.170391450	-3.774577438	2.45x10^-3	3.34x10^-2	-1.585983492
CCDC21	7.390974083	7.513082006	9.449467496	9.539316333	10.295689710	9.371604333	5.674779917	6.881639201	6.917487167	7.347991917	7.137673500	7.730455917	-1.978351057	7.937513465	-3.773162961	2.46x10^-3	3.35x10^-2	-1.588578424
SIX4	4.571936628	4.384893250	4.320977333	4.712075263	5.131769000	5.131158167	6.515499065	5.843338417	5.061797083	5.855657417	5.463555833	5.543760750	1.005133154	5.211368184	3.772927868	2.46x10^-3	3.35x10^-2	-1.589009725
SLC41A2	10.192365170	11.026284740	10.685174610	10.898039490	10.813748330	10.490713210	8.216420620	7.367109074	8.954302597	9.492310973	9.959111217	10.214189830	-1.650480205	9.859147488	-3.771120832	2.47x10^-3	3.36x10^-2	-1.592324996
MAN2B2	8.806914560	9.816668333	9.375179066	9.154961667	9.534077569	8.913534428	8.131652507	7.689068917	8.307856117	7.947170478	9.221779033	7.641854583	-1.110325665	8.711726438	-3.771080781	2.47x10^-3	3.36x10^-2	-1.592398477
LOC100129857	10.600954830	11.166294170	10.275699330	11.419408980	10.734749170	9.254187000	6.901338833	9.040299167	9.780047167	9.341036833	8.994485847	8.437709540	-1.826062682	9.662184239	-3.770228646	2.47x10^-3	3.36x10^-2	-1.593961902
C21orf30	7.766078538	6.753144167	6.285503000	6.986691583	7.772552250	6.459804189	2.703843917	4.916648917	5.464219083	5.654563167	5.697162250	5.889683976	-1.949608736	6.029157920	-3.770001909	2.47x10^-3	3.36x10^-2	-1.594377906
RPL23AP7	14.127095830	13.336280730	14.079810000	13.749258330	13.502753330	13.993155000	15.019111670	15.538614170	15.293273650	14.560651670	14.266775000	14.287483200	1.029592687	14.312855210	3.769060371	2.48x10^-3	3.36x10^-2	-1.596105413
BEND3	7.966634055	7.973255167	6.270878155	7.687459833	6.487032667	6.740842750	9.630815333	9.211891833	8.261310000	9.001662500	9.194446000	7.497257583	1.611880104	7.993623823	3.768112381	2.48x10^-3	3.37x10^-2	-1.597844805
TMEM25	8.473058583	7.961846833	9.255974667	8.376640417	9.081100333	9.272285917	7.459471083	7.037398750	7.053290917	8.323632333	7.073425250	8.125038500	-1.224774986	8.124430299	-3.765385126	2.50x10^-3	3.38x10^-2	-1.602849073
DHRS12	10.465635330	10.813748330	11.334095370	11.172765000	11.215481740	10.303976330	8.817972010	8.811603263	9.038999167	9.349798083	10.454764250	10.585643580	-1.374486958	10.197040210	-3.764698793	2.50x10^-3	3.38x10^-2	-1.604108491
RASGEF1B	6.000620255	7.058393833	6.720005726	6.924125205	5.574282750	5.454081143	4.727283833	4.645630791	5.453011833	5.211598000	5.303148333	5.174612909	-1.202703869	5.687232884	-3.764079086	2.50x10^-3	3.38x10^-2	-1.605245670
SLC17A3	10.485242850	10.280718920	11.742511670	12.034689170	11.291536170	10.363745000	6.929278687	8.446258343	9.782317917	8.803479153	9.951205917	10.068772890	-2.036188477	10.014979720	-3.764070299	2.50x10^-3	3.38x10^-2	-1.605261796
COL1A1	11.203581670	9.655641250	7.473915083	8.136428665	7.638903702	9.579258567	13.018853330	13.451314740	11.206406670	13.563219170	12.894254430	8.918256207	3.227429268	10.561669460	3.763579630	2.50x10^-3	3.38x10^-2	-1.606162201
ARL4A	8.249768023	8.547462292	8.844970107	6.828734833	6.481634848	8.379906378	10.287552600	8.462557489	10.143047750	9.245926955	9.501775104	10.614166140	1.820424926	8.798958543	3.761896387	2.51x10^-3	3.39x10^-2	-1.609251136
FIT1	6.116747333	6.336283645	6.833203000	6.778985917	6.942659083	5.622287770	4.811955500	5.285020917	5.601913546	5.147915439	5.799943775	5.736657607	-1.041126661	5.917797794	-3.759797649	2.52x10^-3	3.40x10^-2	-1.613102746
SLC39A14	13.606414610	13.906720830	12.967737680	14.397165000	13.722245000	13.493481900	12.917269770	12.916177500	12.515346670	11.900585830	11.089613660	12.829497360	-1.320879039	13.021854650	-3.759627105	2.52x10^-3	3.40x10^-2	-1.613415739
RHO	10.581206830	11.849531100	10.995982170	12.071968640	9.622572667	9.723456753	8.787164917	10.149863080	8.948930250	8.690916583	7.672539750	9.287736931	-1.884594443	9.865155807	-3.758793636	2.53x10^-3	3.40x10^-2	-1.614945391
E2F3	10.249266830	10.226659250	8.826402750	9.939188833	9.510583655	10.601587000	11.193320830	10.599638330	10.986133330	10.882941050	11.146885020	11.014136150	1.078227734	10.431395250	3.758448712	2.53x10^-3	3.40x10^-2	-1.615578433
DCTN2	10.447537150	10.332770670	10.211091670	10.508267580	10.272847330	10.404185580	11.012802500	11.090237500	10.696287760	11.083721670	11.210368330	10.888450830	0.634194767	10.679880710	3.758404134	2.53x10^-3	3.40x10^-2	-1.615660249
CKAP4	9.078920083	9.286041083	8.336244333	8.262258750	9.020646509	8.428571167	10.451374330	10.075038580	10.338253170	10.130522730	11.741614170	8.818442500	1.523760593	9.497327284	3.758396985	2.53x10^-3	3.40x10^-2	-1.615673369
C1orf156	9.517913167	8.590853512	9.747584250	9.455482175	8.807306227	8.970818854	10.466955920	10.634420000	10.453560130	10.113518330	9.325948097	11.041896670	1.157723494	9.760521444	3.757757975	2.53x10^-3	3.40x10^-2	-1.616846169
SIGLEC11	8.639134426	7.812354500	6.170485567	6.040538815	7.779543917	7.440955417	6.209216000	6.357412583	4.774546000	4.344034544	5.821367500	5.171480000	-1.867492669	6.380089106	-3.757431025	2.53x10^-3	3.40x10^-2	-1.617446240
GRPEL2	8.425899204	8.485608115	8.336613366	8.255967951	8.175720292	8.668632500	9.136617638	9.830582250	9.013819417	9.488493667	8.624984000	9.247806425	0.832310328	8.807562069	3.755747249	2.54x10^-3	3.41x10^-2	-1.620536662
CSTB	12.753943490	12.528612500	13.145816670	12.268939170	12.776705650	12.945416670	13.367279180	13.226265830	14.031627500	14.574587500	13.411253030	13.740389270	0.988661361	13.230903040	3.754515252	2.55x10^-3	3.41x10^-2	-1.622797968
TREM2	7.247039216	5.215723833	6.987103417	4.674703848	5.195151000	6.499089051	8.628698328	7.969744167	8.456928837	9.437962333	8.577808333	6.065978583	2.219718369	7.079660912	3.754492201	2.55x10^-3	3.41x10^-2	-1.622840279
BLVRA	12.976678310	12.368034170	11.958735830	11.431855000	11.638900830	12.907611670	14.716710830	14.411908330	14.067545130	13.525416670	13.759202520	12.265957940	1.577487602	13.002379770	3.753018774	2.55x10^-3	3.42x10^-2	-1.625544826
CNDP2	10.118810510	10.388082310	10.341938960	10.166334750	10.211091670	10.094728830	10.073055500	9.165136500	9.219911500	9.675212928	9.317674417	9.352207167	-0.752964836	9.843682087	-3.752727125	2.56x10^-3	3.42x10^-2	-1.626080173
LOC338809	0.103028333	0.177961250	1.027909096	0.147304583	0.260803217	1.679992867	2.915895953	2.982097417	3.237361750	0.102078833	3.091183333	2.667768917	1.933231143	1.532782129	3.750572565	2.57x10^-3	3.43x10^-2	-1.630035191
MVK	11.759552500	12.228319170	11.891010060	12.010618770	12.521889170	11.384249170	10.298625080	10.424934670	10.658898330	10.999940000	11.715932270	11.272783740	-1.070754123	11.430562740	-3.749327572	2.57x10^-3	3.44x10^-2	-1.632320661
MAP4K4	9.085515681	8.887669054	8.193083270	8.599770500	8.320584002	8.773580547	9.424668216	10.385427310	9.071726500	10.647766670	9.916389167	9.246625667	1.138733413	9.212733882	3.748035745	2.58x10^-3	3.44x10^-2	-1.634692186
DTD1	9.741515110	9.640859667	9.634320795	9.571592833	9.226674583	9.444835005	10.559621420	10.293769170	10.331581580	9.626786554	10.813064000	10.855956700	0.870163572	9.978381451	3.747837722	2.58x10^-3	3.44x10^-2	-1.635055721
TSEN15	9.881639244	9.776468000	9.867829333	9.581004805	9.588234983	10.038007960	11.152065550	10.517998170	10.585285580	10.193485310	10.202135520	11.006279170	0.820677497	10.199202800	3.747637677	2.58x10^-3	3.44x10^-2	-1.635422973
CD14	11.394124600	12.036956670	12.603218320	12.803381670	12.407045000	11.187911890	9.755942583	9.456747500	11.030931670	11.435723380	10.757507770	10.970060000	-1.504287540	11.319962590	-3.745620738	2.59x10^-3	3.45x10^-2	-1.639125846
HYAL1	10.607374250	10.758098170	10.545620000	10.620686170	11.004635830	10.169821170	7.401876500	9.052747583	9.293326838	9.160878083	9.578330333	10.334509810	-1.480761074	9.877325395	-3.744141062	2.60x10^-3	3.46x10^-2	-1.641842489
DBN1	8.312828333	7.250448875	7.395608667	7.009580202	6.222513583	8.199772488	10.202135520	8.803070854	9.620868197	9.614933083	9.087475083	7.526728734	1.744076555	8.270496969	3.742151172	2.61x10^-3	3.47x10^-2	-1.645496032
EFNB3	8.708693281	8.991866758	9.979437307	9.724530368	9.052747583	8.389763333	7.321286500	7.685359333	8.244449250	8.256763750	7.951322293	8.469572833	-1.153047445	8.564649382	-3.741427387	2.61x10^-3	3.47x10^-2	-1.646824985
NME5	7.850249562	7.173601833	7.346737583	6.624181833	6.652536833	7.195757250	6.882969845	5.483081870	6.063802750	6.143870513	5.640236250	4.606539833	-1.337093972	6.471963830	-3.741320419	2.61x10^-3	3.47x10^-2	-1.647021393
HSF2	8.668344417	8.046648602	8.417312657	8.165410538	7.942934367	8.588249435	9.745827833	10.350408580	8.992702750	9.133147239	8.606795514	9.538673113	1.089775836	8.849704587	3.741280989	2.61x10^-3	3.47x10^-2	-1.647093792
SRPK2	8.115684701	8.059516247	8.580789833	8.296710333	7.523115100	8.051238158	9.531050167	8.826402750	9.064385532	8.567117728	8.695637417	9.268419571	0.887659799	8.548338961	3.741016921	2.61x10^-3	3.47x10^-2	-1.647578659
C7orf28A	11.621205000	11.575190000	11.595590880	11.582760120	11.277568720	11.653726750	13.356881230	12.641023330	12.245158380	12.417192150	12.153484170	11.923690000	0.905231299	12.003622560	3.740280554	2.62x10^-3	3.47x10^-2	-1.648930753
C7orf28B	12.071385000	12.091288630	11.889154170	12.047671240	11.851010830	12.326328330	13.702353330	13.076896670	12.477377500	12.945416670	12.824550830	12.468060790	0.869636265	12.480957830	3.740197536	2.62x10^-3	3.47x10^-2	-1.649083190
THRSP	13.681888230	12.940178330	15.346731670	14.371225240	14.517580830	12.849617890	8.238022833	5.371115711	12.312732500	8.837528018	13.885872020	5.956902667	-4.850841407	11.525783000	-3.738984935	2.62x10^-3	3.47x10^-2	-1.651309791
ASB12	5.872844000	5.990871750	7.829078000	7.603309121	5.976242555	5.650634250	3.875010250	4.385645667	4.891940663	5.879404250	4.502621713	5.133695250	-1.709110314	5.632608122	-3.738419054	2.62x10^-3	3.47x10^-2	-1.652348893
LGR4	12.001293610	11.541216670	11.587705000	11.900090000	12.112904150	11.429764460	10.585643580	10.682801670	11.333350170	10.742484690	11.460007500	10.356187420	-0.902083142	11.311120740	-3.738412222	2.63x10^-3	3.47x10^-2	-1.652361439
FCAMR	7.789756191	8.424075833	8.781366250	8.530222417	9.089902583	8.498082083	6.419604167	6.618345845	8.500014000	6.889752333	7.461616463	7.377044167	-1.307838064	7.864981861	-3.736820204	2.63x10^-3	3.48x10^-2	-1.655284878
GPX2	9.028896090	10.708986670	9.026804142	10.361868630	10.330714420	11.094521170	12.434534170	11.540726850	11.960817500	13.360563220	10.374919290	12.163071670	1.880473596	11.032201980	3.736753494	2.63x10^-3	3.48x10^-2	-1.655407380
CAMK2D	11.206406670	10.910091670	10.836945260	10.796570000	11.680518330	11.325455830	10.866949660	10.595332820	10.074112570	9.863941173	9.784546102	9.599504000	-0.995266908	10.628364510	-3.736514366	2.63x10^-3	3.48x10^-2	-1.655846505
HEXDC	7.129143667	7.281569667	7.417014571	7.277675083	7.504245333	7.438629749	6.154879116	6.490909917	6.838500585	6.858487085	6.757787417	6.761174000	-0.697756658	6.992501349	-3.736210108	2.64x10^-3	3.48x10^-2	-1.656405235
RNF151	6.507001613	7.352533529	7.297673247	7.780310413	7.878254390	7.092093211	5.762175625	6.321151373	6.132598167	6.293781583	6.679230750	6.708039833	-1.001814845	6.817070311	-3.734819744	2.64x10^-3	3.48x10^-2	-1.658958507
MAPK1	8.325363747	8.294470408	8.373603417	8.288745632	8.029207917	8.647073210	9.044558250	9.088689781	8.894028258	9.405335756	9.086035667	8.666528667	0.704452008	8.678636726	3.734568820	2.64x10^-3	3.48x10^-2	-1.659419315
MPV17	7.610359877	7.060217324	7.673006953	7.096049797	6.805379417	7.341872785	8.347858167	8.634021262	7.991290758	9.011655333	7.653448083	7.927731030	0.996519747	7.762740899	3.734412450	2.64x10^-3	3.48x10^-2	-1.659706482
USP53	9.239973500	9.007498500	9.047736833	11.187911890	11.284337500	10.556686000	7.336867674	8.120662232	8.021994917	8.650150000	8.112712333	9.266055679	-1.802616897	9.152715588	-3.733669837	2.65x10^-3	3.48x10^-2	-1.661070270
LPAR3	5.728262792	5.163872500	7.563196086	7.141491737	7.467002250	6.595847067	2.230797742	3.332401848	4.665470250	4.918121243	5.286606167	5.582607704	-2.273944580	5.472973115	-3.732490779	2.65x10^-3	3.49x10^-2	-1.663235632
SERPINB1	11.248167860	12.084947500	11.073178330	11.861364370	10.547075500	11.342215000	13.179262500	12.073285000	12.469449610	12.683138050	12.159458330	12.181935830	1.098263460	11.908623160	3.731611384	2.66x10^-3	3.49x10^-2	-1.664850698
FLJ43390	4.451019250	2.696056975	4.851305833	4.133668000	5.453011833	4.504351167	1.162318641	1.668358117	2.605229337	0.102078833	3.068071000	3.768806167	-2.285758494	3.205356263	-3.729052301	2.67x10^-3	3.51x10^-2	-1.669550819
SP1	9.210694500	9.036141251	10.572478250	10.522868270	10.326752030	9.415950500	8.992269167	8.545366667	8.871934583	8.567488614	8.422493040	8.814073833	-1.145209816	9.274875892	-3.728630468	2.67x10^-3	3.51x10^-2	-1.670325604
GPC3	8.945763583	9.261099000	6.129713792	5.856731000	5.550771941	10.244099140	9.189683577	9.103641236	13.170195830	14.304366290	11.687050830	13.442037500	4.151466135	9.740429478	3.728082281	2.68x10^-3	3.51x10^-2	-1.671332477
ACSM2A	13.107388730	12.986029000	14.311375090	13.904950360	13.411253030	12.973690970	7.072259892	10.023138210	11.499468550	10.976322580	10.338253170	13.254858870	-2.921730986	11.988249040	-3.725892471	2.69x10^-3	3.52x10^-2	-1.675354705
CDC123	10.743840670	10.732431340	11.378858860	11.277568720	10.658898330	10.677361650	12.421824020	12.227265830	11.682848730	12.599432500	11.074269170	11.747642290	1.047387163	11.435186840	3.725719636	2.69x10^-3	3.52x10^-2	-1.675672175
TMEM184B	11.256583330	11.139394170	10.219086820	10.421190510	10.675574170	11.413120150	13.191859460	11.687050830	12.181217500	12.679616670	12.502164170	11.017840010	1.355799913	11.532058150	3.725434576	2.69x10^-3	3.52x10^-2	-1.676195789
DUSP18	6.859746689	6.283920333	5.270121333	5.097071908	5.338635917	6.069201500	8.247661500	6.968187828	7.246159879	6.976113417	7.049478667	6.520911917	1.348302588	6.493934241	3.722598471	2.70x10^-3	3.54x10^-2	-1.681405505
ZNF572	7.842758079	6.211811883	8.258862288	6.783436142	7.768041185	7.652179333	8.845428083	9.489811020	8.714314667	9.201928333	7.712072559	9.371604333	1.469678348	8.154353992	3.720900122	2.71x10^-3	3.55x10^-2	-1.684525416
DDOST	11.756047500	11.269313290	11.377050830	11.397823440	11.413120150	11.086318330	12.647195130	12.618652630	11.886447420	12.604917510	11.675309170	12.030852190	0.860616747	11.813587300	3.719030703	2.72x10^-3	3.56x10^-2	-1.687959734
ACTR3	11.460469220	11.045573650	11.306261110	11.220059980	10.837346080	11.375036140	13.023231990	12.399553160	12.174985770	11.968522220	11.616391200	11.729567710	0.944584309	11.679749850	3.718291794	2.73x10^-3	3.56x10^-2	-1.689317230
DEGS1	8.927851772	8.936347333	9.318221417	9.227014782	8.634021262	9.104694250	10.385427310	9.507276606	10.032616080	10.292261170	9.405697341	9.671126417	0.857709019	9.453546312	3.717221784	2.73x10^-3	3.56x10^-2	-1.691283054
HACE1	6.708348572	5.990655500	6.388635750	6.162290800	5.814346250	5.979375000	7.764731068	7.930936667	6.977689808	6.903857167	6.369889833	7.582099000	1.080925278	6.714404618	3.716992241	2.73x10^-3	3.56x10^-2	-1.691704777
CNFN	10.296988670	10.423103080	10.548046920	10.743840670	10.657072430	10.558284010	11.590542610	11.441864910	11.013501670	11.253204880	11.596395830	10.792158540	0.743388777	10.909583680	3.716665412	2.73x10^-3	3.56x10^-2	-1.692305241
OTOP3	6.613653833	6.573176500	8.459356500	8.327963217	6.118259589	7.883094333	5.554586500	5.219621731	6.138175842	5.909799258	4.067308750	6.133949667	-1.825343704	6.416578810	-3.716486095	2.73x10^-3	3.56x10^-2	-1.692634692
DSN1	9.102301366	9.106977000	9.808637771	8.875943108	9.141159742	10.033934500	10.931488680	10.405730400	11.060942700	10.656089540	9.322454583	11.071819170	1.229928597	9.959789880	3.716139410	2.74x10^-3	3.56x10^-2	-1.693271643
CLIC1	12.569281720	11.650101670	12.099205090	11.359004250	11.455139250	12.260540840	14.069721670	13.720734170	13.229520830	13.356881230	12.433825830	12.283256670	1.283444596	12.540601100	3.715562577	2.74x10^-3	3.56x10^-2	-1.694331449
LOC100190890	11.113880000	11.033000000	10.595929920	10.658898330	11.921324170	10.431225820	8.635741170	8.230341818	9.749913608	8.632357583	10.666360000	10.153562950	-1.614330185	10.151877950	-3.713786756	2.75x10^-3	3.57x10^-2	-1.697594226
SULT2B1	2.552471248	2.611890500	1.027909096	2.305327167	3.916808967	3.895970302	6.361197417	4.197945397	3.329116371	5.118580457	4.894567599	4.884411333	2.079240216	3.758016321	3.712742261	2.75x10^-3	3.57x10^-2	-1.699513377
LOC100128548	13.906720830	13.526790000	13.675730830	13.802787500	13.691326670	14.326412500	14.253698020	15.021210390	14.328504290	14.950132500	14.723737500	14.464321670	0.801972672	14.222614390	3.712583941	2.75x10^-3	3.57x10^-2	-1.699804279
ACOX2	13.603734970	13.665854750	14.441031940	14.038703730	14.253698020	13.783385850	8.110246999	11.867196840	12.313887970	11.568671950	11.590542610	13.338456300	-2.499567766	12.714617660	-3.711697590	2.76x10^-3	3.58x10^-2	-1.701432899
MAOA	12.627415830	13.055729740	13.513036640	13.695760000	13.191859460	12.887319170	11.049174170	12.206611670	11.524452360	11.532385000	11.425418150	13.276212790	-1.326144452	12.498781250	-3.709140851	2.77x10^-3	3.59x10^-2	-1.706130953
ANKS6	8.310787929	7.593382082	6.387495546	6.720979650	7.487362274	7.647094472	10.241946020	9.640005067	9.163797391	7.740450493	9.601452890	8.049122889	1.714945466	8.215323059	3.708608779	2.78x10^-3	3.59x10^-2	-1.707108679
MAPK9	6.244240917	6.178576583	6.763717667	5.817660667	5.404157833	6.448041250	7.596557290	7.645437917	7.195757250	8.178883620	6.115597833	8.035776167	1.318602527	6.802033749	3.707283212	2.78x10^-3	3.60x10^-2	-1.709544571
DCLRE1B	5.860605220	6.548119417	4.800685333	3.765289667	3.869038083	5.452394583	7.714632558	8.139322500	7.565381667	6.255030352	6.010173750	6.555640167	1.990674782	6.044692775	3.706587481	2.79x10^-3	3.60x10^-2	-1.710823092
LOC63920	6.944984333	5.604287350	6.727173333	6.371457738	6.660113083	6.980892237	8.103384083	7.917163399	7.572387901	7.304842917	6.925726529	8.485608115	1.170034145	7.133168418	3.706341147	2.79x10^-3	3.60x10^-2	-1.711275776
KCTD7	7.772074108	6.815333000	7.419212916	7.542154667	7.819649336	7.222188917	5.792747779	6.118259589	6.369256583	6.096085733	7.046764500	7.014126510	-1.025562041	6.918987803	-3.705813846	2.79x10^-3	3.60x10^-2	-1.712244799
ATP6V0D2	0.103028333	1.781867800	1.027909096	1.721703600	-0.888781808	0.588592542	3.544182333	0.141257917	4.439160500	5.054135250	6.313371667	3.918095250	3.179313892	2.312043540	3.704017779	2.80x10^-3	3.61x10^-2	-1.715545520
RNMTL1	10.550220110	11.172412920	10.363745000	10.753451050	10.782545000	10.757507770	9.945848250	10.636527650	9.528106250	9.712933167	9.556516545	9.818897667	-0.863508721	10.298225950	-3.703370419	2.80x10^-3	3.62x10^-2	-1.716735240
ARMC5	10.902232820	10.095232310	10.736179820	10.719867530	11.553303710	10.026706240	9.566505843	9.388325123	9.280828288	9.575999466	9.511517005	10.324681260	-1.064277574	10.140114950	-3.702844942	2.81x10^-3	3.62x10^-2	-1.717700975
FAM101A	5.579320620	3.540432917	1.027909096	3.198586250	4.836022581	5.489022750	7.430230667	6.753487785	7.997008250	7.108139923	6.237020083	4.952423604	2.801169350	5.345800377	3.702603997	2.81x10^-3	3.62x10^-2	-1.718143794
ABCC4	3.625836843	1.605274910	1.027909096	0.147304583	0.000000000	2.527765238	7.222945194	4.977143916	4.031727803	5.934266680	1.766611109	4.161774922	3.193396492	3.085713358	3.701857556	2.81x10^-3	3.62x10^-2	-1.719515650
SCAMP3	7.852217482	8.132849000	8.754806917	8.512941083	8.004806895	8.082684288	9.150414518	8.800895014	8.789602417	9.484369333	8.803847417	9.229167749	0.819665131	8.633216843	3.701760369	2.81x10^-3	3.62x10^-2	-1.719694269
BCAT1	6.939896667	6.090734223	5.772660333	4.396598911	3.286790833	6.858857958	7.960706000	8.679448282	7.970173417	8.372745829	7.359455917	6.587932917	2.264153906	6.689666774	3.700977987	2.82x10^-3	3.62x10^-2	-1.721132206
NNMT	16.950034470	18.238866240	16.746574730	18.115289540	17.595155000	15.916963330	15.443729170	15.096034940	15.853974170	16.443365830	16.252249170	14.367553020	-1.684329504	16.418315800	-3.700276082	2.82x10^-3	3.62x10^-2	-1.722422257
SCP2	14.213535830	14.932996510	14.884481670	14.572626670	14.619884170	14.841034170	13.424033700	12.964421670	13.874624660	14.065010000	12.839769160	14.428340390	-1.078059905	14.138396550	-3.698325162	2.83x10^-3	3.63x10^-2	-1.726008018
WDR12	9.935465583	9.811935947	10.973539170	10.619704920	10.099683170	10.193485310	11.746936670	12.742718220	10.746561670	11.223736670	10.981247270	11.783542630	1.265154838	10.904879770	3.697749259	2.83x10^-3	3.63x10^-2	-1.727066548
SERAC1	2.939213083	1.561983825	4.253393417	0.147304583	0.328367558	1.260458156	5.021042250	3.444823842	3.354463633	4.851305833	3.990269604	4.192779750	2.393994048	2.945450461	3.696972937	2.84x10^-3	3.64x10^-2	-1.728493476
CYP3A43	7.460205000	7.993862417	8.789246077	8.617482344	9.098400333	8.346621667	5.556194784	6.642367167	5.905730167	6.902447314	7.799691500	7.870054167	-1.604888790	7.581858578	-3.695434746	2.84x10^-3	3.65x10^-2	-1.731320842
TMEM140	10.195580580	10.792951670	10.089958920	10.008944170	9.784546102	10.624586720	8.381195167	9.146410917	8.735013083	8.905171442	9.990951833	9.680985167	-1.109473425	9.694691314	-3.695175707	2.85x10^-3	3.65x10^-2	-1.731796994
C20orf177	9.341036833	8.197778167	7.967345083	8.037661833	8.106642452	8.678070581	9.821394000	10.012753920	9.456299083	9.642930994	9.226674583	8.732790584	1.094051369	8.935114843	3.694629889	2.85x10^-3	3.65x10^-2	-1.732800296
HNRNPA1	13.496306770	12.834829170	13.179262500	13.088793330	12.903131820	13.276212790	14.405463330	14.656848080	13.942134170	14.016340000	13.259037500	13.957342250	0.909771491	13.584641810	3.693732217	2.85x10^-3	3.65x10^-2	-1.734450391
FAIM	10.091340220	9.822911723	9.189275997	9.344369000	8.808287351	10.003784830	11.065059030	10.324681260	10.813748330	10.991148330	10.033049080	10.319271080	1.047831332	10.067243850	3.693332738	2.86x10^-3	3.65x10^-2	-1.735184721
EIF2S3	8.553124500	8.469572833	8.660587139	7.981778557	8.076788333	8.026950667	9.402895500	8.783402500	9.035680983	8.767443333	9.319381763	9.087094833	0.771182814	8.680391745	3.693113122	2.86x10^-3	3.65x10^-2	-1.735588426
CYP4F12	8.671921056	9.268419571	10.757507770	10.415377170	10.463588640	9.079729333	5.959016183	6.439664775	7.595552787	8.291706250	7.946232241	9.486530750	-2.156306759	8.697937210	-3.692842460	2.86x10^-3	3.65x10^-2	-1.736085968
PDGFRL	4.383946250	5.664545667	1.027909096	3.581531833	3.056075333	5.102473500	8.963452500	7.957943015	7.107153917	8.001826629	7.439072250	3.642607690	3.382595720	5.494044807	3.688276373	2.88x10^-3	3.68x10^-2	-1.744479982
TATDN1	9.226326000	8.511263040	10.496774040	9.629547813	9.044558250	8.908691188	10.044079750	10.510159870	10.303500920	11.589837780	10.478426750	10.653050670	1.293649235	9.949684672	3.688201484	2.88x10^-3	3.68x10^-2	-1.744617660
TPR	11.974499170	11.858983600	10.669067500	11.027390000	11.342215000	11.540726850	13.072157790	12.665957500	12.080029420	12.299103850	12.165640830	12.183157970	1.008860874	11.906577460	3.687845481	2.89x10^-3	3.68x10^-2	-1.745272148
OR12D3	7.877142583	8.344626083	9.065443553	9.711794167	10.214189830	8.833280917	6.057932917	6.448041250	7.545660167	7.191238500	8.399712417	7.915623083	-1.748044800	8.133723789	-3.687166791	2.89x10^-3	3.68x10^-2	-1.746519894
LOC441896	15.289285830	14.316076670	15.712556670	15.051587890	14.697622940	15.062044170	16.148221670	16.242232500	16.232736810	16.306540830	15.779599160	15.346731670	0.987814745	15.515436400	3.687086822	2.89x10^-3	3.68x10^-2	-1.746666914
ROMO1	13.262161670	13.482231300	13.165123330	13.268740830	13.706686080	13.658234170	13.922780670	14.344739030	14.239991050	14.157576670	14.471573020	13.757157500	0.725106760	13.786416280	3.686788917	2.89x10^-3	3.68x10^-2	-1.747214607
KIF23	7.232758442	7.815011457	7.852627213	8.440513250	8.658612667	7.292341240	10.027379580	9.906392000	9.122067921	9.660852667	8.375425425	8.421887390	1.370356786	8.567155771	3.686261540	2.89x10^-3	3.68x10^-2	-1.748184189
EXOC4	7.851821667	7.563196086	8.028912888	7.284618811	7.125239069	7.667000000	8.592204500	8.429828500	8.350443301	8.291348917	8.009524417	8.420033779	0.762099149	7.967847661	3.683459815	2.91x10^-3	3.70x10^-2	-1.753335342
LILRA1	7.632264841	7.772746375	7.968080333	8.098187083	8.023786583	7.393802500	6.034698522	7.574042384	6.964244997	6.770962077	7.192136667	6.453004297	-0.983296462	7.323163055	-3.681988199	2.92x10^-3	3.70x10^-2	-1.756041125
CES7	6.686324700	5.625348750	8.687344333	7.892787833	7.473915083	5.158833254	3.614149833	3.677437000	4.623426083	3.986139750	5.885751804	5.725079000	-2.335428414	5.753044785	-3.680223642	2.93x10^-3	3.71x10^-2	-1.759285636
ATP11C	9.090783320	9.522806000	10.457935670	10.726935000	10.150590750	9.588654000	9.056516513	8.666301083	9.047068583	8.225061000	8.121937250	9.283362083	-1.189576370	9.328162604	-3.679926071	2.93x10^-3	3.71x10^-2	-1.759832794
C18orf34	7.327503083	6.377517143	7.680433500	7.590079309	6.065172583	5.644521500	4.837140900	5.831335778	5.753969667	5.618540500	3.388360633	3.945267667	-1.885101996	5.838320189	-3.679700028	2.93x10^-3	3.71x10^-2	-1.760248433
CARKD	10.393259000	11.133916510	10.401069680	10.597276250	10.733484220	10.716738170	9.665594005	9.649823673	9.878044833	9.243684250	9.754992093	10.539942250	-0.873943788	10.225652080	-3.678462315	2.94x10^-3	3.72x10^-2	-1.762524326
FDPS	13.526790000	13.100494170	14.031627500	13.594176240	13.913712930	13.301694170	14.520162170	14.134694170	14.825947500	14.439508330	15.277075000	14.011760630	0.956775467	14.056470230	3.677117425	2.94x10^-3	3.72x10^-2	-1.764997363
DKFZp667F0711	4.855013833	5.791047500	6.263199917	6.199935215	4.859352250	5.351302076	4.319806917	4.507270167	4.414549667	4.836472979	4.151363583	2.821142167	-1.378207552	4.864204689	-3.676513996	2.95x10^-3	3.72x10^-2	-1.766106993
DKFZp434H1419	5.959016183	4.085357833	1.027909096	2.172934242	4.441613250	4.904008012	7.275831901	6.827820187	6.086839503	6.936144083	6.615218250	5.125380285	2.712732599	5.121506069	3.676452942	2.95x10^-3	3.72x10^-2	-1.766219264
PAK1	7.057536000	6.533977667	6.932388000	6.434192209	6.235928917	6.651385825	8.049381794	7.888876333	7.736307648	8.157227544	7.474646333	6.629960486	1.015165253	7.148484063	3.674654285	2.96x10^-3	3.73x10^-2	-1.769526858
EGR1	15.936870830	14.555046670	13.816293330	14.853866670	13.241766690	13.390674020	12.978997500	11.217720000	13.555915000	11.677156670	13.008695830	11.003157500	-2.058812619	13.269680060	-3.672976677	2.97x10^-3	3.74x10^-2	-1.772611962
GEMIN6	11.805123900	11.350030830	11.658159170	11.957932500	11.901317500	11.929854260	13.015581670	13.981057100	12.694618330	12.191065000	12.450911430	12.590930830	1.053624368	12.293881880	3.672689491	2.97x10^-3	3.74x10^-2	-1.773140105
CYP2B7P1	7.307062213	6.703226833	6.816992418	6.471135988	8.114072154	6.581551689	4.559181188	2.611890500	5.949405833	4.622735833	6.487881000	5.333488451	-2.071576415	5.963218675	-3.671917430	2.97x10^-3	3.75x10^-2	-1.774559960
ZDHHC13	7.940977500	7.320767826	7.382910686	6.784440248	6.573970417	7.580676931	8.828078833	8.334650629	8.644634200	8.795882083	8.194186583	7.458381128	1.112011641	7.819963089	3.670557835	2.98x10^-3	3.75x10^-2	-1.777060374
TCEB1P3	10.330714420	10.640956750	11.050203330	10.817791080	10.837822500	10.638715000	10.948746300	11.598477060	11.514215830	12.302303330	11.863557360	11.388542690	0.883273250	11.161003810	3.670186223	2.98x10^-3	3.75x10^-2	-1.777743813
OR2A7	6.815333000	7.038635167	7.834674328	7.591118250	8.678070581	7.829344417	5.529359667	5.569700630	6.174761833	5.650991250	6.918507840	7.268899087	-1.445825906	6.908283004	-3.669945234	2.98x10^-3	3.75x10^-2	-1.778187023
RABIF	8.058441040	8.643955500	8.663239167	8.505871400	7.698269250	8.274867750	9.803443250	9.138169333	9.092031927	9.726807167	8.537648539	9.387974417	0.973571754	8.794226562	3.669890540	2.98x10^-3	3.75x10^-2	-1.778287613
C11orf73	11.748342950	11.457917540	12.969918760	12.842843330	11.749804570	12.222348160	13.006918400	13.244617500	13.298225000	13.737271730	13.268740830	12.886135000	1.075122192	12.702756980	3.669637149	2.99x10^-3	3.75x10^-2	-1.778753634
DECR1	14.586311670	15.120249980	15.745724170	15.006209280	14.960889690	14.720860210	13.487657500	13.086443840	14.363901880	14.211487500	14.452837500	14.161611670	-1.062717518	14.492015410	-3.669309149	2.99x10^-3	3.75x10^-2	-1.779356877
RP11-529I10.4	8.583441475	8.252173984	9.421637917	8.819794417	8.395095333	8.354800400	10.828140000	10.120087840	9.665962594	10.268871920	8.742000500	9.633488833	1.238601359	9.257124601	3.668987681	2.99x10^-3	3.75x10^-2	-1.779948109
SRD5A3	9.553132833	9.394093250	10.293769170	10.093204170	9.507276606	9.450630917	10.597276250	10.610357080	10.331172830	10.546053920	10.229976460	10.692312500	0.785840351	10.108271330	3.668528268	2.99x10^-3	3.75x10^-2	-1.780793052
ANKRD57	10.564744380	10.635086090	10.620686170	11.813993860	10.497087830	10.578609100	9.065846588	8.616502190	9.205798371	9.315046276	10.069314610	10.608118330	-1.304930174	10.132569480	-3.668216534	2.99x10^-3	3.75x10^-2	-1.781366391
FAM118B	7.951543833	7.313190167	7.990207000	7.753056667	6.624595500	7.261057993	8.592565917	8.460125441	8.729810000	8.975950673	7.952740583	8.248462917	1.011000729	7.987775558	3.667536124	3.00x10^-3	3.75x10^-2	-1.782617809
LOC729798	15.763967780	15.157796670	15.621394690	15.548478200	15.208272760	15.557663380	16.320476140	16.776284300	16.474262010	16.125758410	15.885992500	15.953466670	0.779777759	15.866151130	3.667460023	3.00x10^-3	3.75x10^-2	-1.782757775
hCG_21078	16.295434910	15.801830830	15.936870830	15.859337500	15.831213330	16.566785000	16.937309100	16.904734040	16.685385380	16.616331400	16.809265000	16.626527500	0.714680001	16.405918740	3.666940376	3.00x10^-3	3.75x10^-2	-1.783713529
PON1	12.601601670	12.477377500	13.939041000	14.118971080	13.478324170	12.288113330	8.031235694	7.128653917	11.068332500	11.937772500	11.492320310	11.353875830	-2.981872999	11.659634960	-3.666787162	3.00x10^-3	3.75x10^-2	-1.783995328
SUPT3H	5.691794918	2.623973167	4.699508417	3.597764720	0.415434658	2.433426333	6.413763679	6.734367128	5.646014000	5.386641500	5.435338750	5.732317103	2.647756658	4.567528698	3.665937362	3.01x10^-3	3.75x10^-2	-1.785558338
ALDH5A1	11.395837800	11.338292770	11.196456300	11.710359090	11.559808680	10.846872740	8.615728685	8.533750544	10.206918110	9.613571578	9.776959394	11.526633430	-1.629010938	10.526765760	-3.665794081	3.01x10^-3	3.75x10^-2	-1.785821872
FAM24B	7.064085917	5.877315839	5.984725317	6.138927088	6.653652417	7.331119321	8.375994000	8.613602083	7.705668917	7.308061250	7.078924631	7.552893833	1.264219803	7.140414218	3.664961761	3.01x10^-3	3.75x10^-2	-1.787352761
LOC100132673	14.708300470	13.757157500	14.474709550	14.109675100	14.124564170	14.095197810	15.621394690	15.960287500	15.314630480	15.203157500	14.902769110	14.384721770	1.019559409	14.721380470	3.664654482	3.01x10^-3	3.75x10^-2	-1.787917948
LOC100129488	9.044558250	9.500501739	8.685331417	8.128784500	10.106794920	8.881256917	4.374921583	6.648515521	6.668752716	6.296683250	7.492179583	9.049688430	-2.302747776	7.906497402	-3.664519704	3.01x10^-3	3.75x10^-2	-1.788165848
SNX27	9.828174117	9.427386824	8.482653933	8.752975578	8.975710151	8.761428158	10.886254500	9.910522973	9.383233593	10.215391500	10.447537150	9.988239750	1.100475117	9.588292352	3.664482901	3.01x10^-3	3.75x10^-2	-1.788233543
TM2D3	12.429159170	12.318689740	12.200133750	12.621606420	12.045846670	12.415125000	11.750508620	11.843346670	11.634220000	11.898555830	11.251312170	11.523042500	-0.688262493	11.994295540	-3.662539619	3.03x10^-3	3.77x10^-2	-1.791807960
VPS72	9.624233750	9.408063090	9.716766000	9.222512667	9.710468432	9.679670505	10.902774170	10.704070830	9.706348833	11.130849720	9.937534490	11.146885020	1.027791438	10.074181460	3.661297797	3.03x10^-3	3.77x10^-2	-1.794092203
ECD	10.540536760	10.929394170	10.756118330	11.075594820	10.644572500	10.974129170	11.392985830	12.261441000	11.154385000	12.103498990	11.517874020	11.528878330	0.839786238	11.239950740	3.660335322	3.04x10^-3	3.78x10^-2	-1.795862647
YWHAZ	11.232300830	11.037451670	10.634420000	10.517998170	10.502301980	11.047450000	12.534534170	11.784579180	11.785276970	12.660852260	12.214605830	10.803506120	1.135238649	11.396273100	3.659274903	3.04x10^-3	3.78x10^-2	-1.797813292
ZKSCAN3	5.848659500	5.571919902	5.627809583	5.003927250	5.159976000	6.045641667	6.586423808	7.746992184	6.689172882	6.413106104	5.819858242	7.881340500	1.313159970	6.199568969	3.658863303	3.05x10^-3	3.78x10^-2	-1.798570445
PRKCDBP	9.731421167	9.235490250	8.972999485	9.318221417	8.977587250	9.334374500	11.258101670	10.172483920	11.021094260	10.718015830	10.883760830	9.062379083	1.257623588	9.890494139	3.658160833	3.05x10^-3	3.78x10^-2	-1.799862675
LHFPL2	8.322819615	8.387532073	7.844067667	7.154879500	7.481728750	8.683679083	10.164811500	9.629821977	9.348297917	10.118810510	9.248752500	7.970173417	1.434326855	8.696281209	3.657027723	3.06x10^-3	3.79x10^-2	-1.801947126
TPM2	11.498448330	10.401069680	9.455299752	10.132326920	9.570103333	11.120724740	12.399553160	12.761490830	12.540010000	12.796038330	12.225928040	10.198862330	1.790651656	11.258321290	3.656686866	3.06x10^-3	3.79x10^-2	-1.802574170
SPON2	14.147619990	14.206379170	12.370559170	13.166491240	13.102543330	14.225525830	13.877945000	15.114873090	14.932996510	15.693762500	15.645653940	14.754798880	1.466818531	14.269929050	3.656636635	3.06x10^-3	3.79x10^-2	-1.802666576
MCM4	7.444317639	7.491748917	5.544675564	6.601749308	5.910989417	7.172762333	9.862305638	9.681530573	7.190972362	9.711229667	7.353417500	8.569432000	2.033774094	7.711260910	3.656411543	3.06x10^-3	3.79x10^-2	-1.803080661
OPN1LW	8.217438333	8.735013083	9.597562917	9.943840917	8.986614917	7.831754667	6.371881583	7.493976417	8.161541886	7.855203333	7.642256167	6.768308000	-1.503176241	8.133782685	-3.655292279	3.07x10^-3	3.79x10^-2	-1.805139709
CPN2	9.181281333	9.940852250	10.000361500	10.220912300	10.276167820	8.783831333	5.802558333	7.698817917	7.915992500	7.823305333	8.244917489	9.580645727	-1.889528205	8.789136986	-3.654947645	3.07x10^-3	3.79x10^-2	-1.805773724
EXOG	4.200287875	4.025705375	4.513050359	5.046522250	3.285597583	4.114452606	5.760385417	5.575661052	4.813091635	6.060817245	4.825638833	5.163872500	1.168975106	4.782090228	3.654272513	3.07x10^-3	3.80x10^-2	-1.807015757
LOC284230	14.808248330	14.109675100	13.926490830	14.047012500	14.360557380	14.793919170	15.561358540	15.596337160	15.096034940	14.705024520	15.851833750	14.950132500	0.952469682	14.817218730	3.653716171	3.08x10^-3	3.80x10^-2	-1.808039266
RPL31P10	16.554857500	16.004572890	16.155597320	16.315169170	16.242232500	16.474262010	17.209380850	17.172072010	16.917712130	16.554857500	17.159998330	16.904734040	0.695343912	16.638787190	3.653190062	3.08x10^-3	3.80x10^-2	-1.809007164
PYCR1	8.711737851	9.324080833	9.098760667	8.284919000	8.702654667	8.969453750	11.620402720	11.698186430	11.364410510	12.067497030	8.379022984	10.007841580	2.007625746	9.852414001	3.652777688	3.08x10^-3	3.80x10^-2	-1.809765828
YKT6	8.419698250	7.800056583	8.444332656	8.011078669	7.557513424	7.836917500	9.193192500	8.907059000	8.803070854	8.987394922	8.677175876	8.382143833	0.813406651	8.418302839	3.652228899	3.08x10^-3	3.80x10^-2	-1.810775469
RAG1AP1	8.315374000	7.921525250	8.278565917	7.761141333	8.321788500	8.034817833	9.103641236	8.224725147	8.692342000	9.856872167	9.304714876	9.354201589	0.983880697	8.597475821	3.651340568	3.09x10^-3	3.80x10^-2	-1.812409811
TSKU	10.563727770	12.131972500	12.112904150	12.645445830	11.659685830	11.559808680	7.682482120	7.088507166	9.841765250	9.972668000	9.659630853	11.632110830	-2.466063424	10.545892420	-3.650782632	3.09x10^-3	3.80x10^-2	-1.813436309
PSMC2	12.557928330	12.623790740	12.739292780	13.016705830	12.470204170	12.543182810	13.175849770	13.259037500	13.279062120	13.704838510	13.098065290	13.919351670	0.747516698	13.032275790	3.650616942	3.09x10^-3	3.80x10^-2	-1.813741151
RAD21	12.532067260	12.479209170	12.420074170	12.516520830	12.173990580	12.630287500	13.772371670	13.818878330	13.239755480	13.797040000	12.641023330	12.887319170	0.900706412	12.909044790	3.650257583	3.10x10^-3	3.81x10^-2	-1.814402311
NHP2L1	11.439493330	11.455139250	11.505687370	11.575190000	11.109114170	11.301173290	12.608524170	12.328470000	12.217696400	12.301372500	11.968522220	11.546905970	0.764282308	11.779774060	3.649187542	3.10x10^-3	3.81x10^-2	-1.816371037
CALCRL	6.947895154	4.363154825	6.602917750	4.635402310	3.357106700	5.367343833	6.897057917	6.555923750	9.199981361	8.032852000	6.760807917	7.811969083	2.330795242	6.377701050	3.648967887	3.10x10^-3	3.81x10^-2	-1.816775176
SLC18A2	4.182335167	4.388357383	3.899711500	4.323508417	4.116091833	3.047557500	2.506952500	2.784936750	3.456232408	2.508890000	3.078301773	3.444823842	-1.029570754	3.478141589	-3.648589486	3.11x10^-3	3.81x10^-2	-1.817471393
STK39	7.182771583	6.739066833	5.509225583	5.931676333	5.888225750	6.942659083	8.622263500	7.296912750	8.569075673	8.967156000	6.622753751	7.714632558	1.599861511	7.165534950	3.647701259	3.11x10^-3	3.81x10^-2	-1.819105655
NSUN5	9.874121352	9.849281378	9.920805750	9.670288070	9.851058850	9.869322535	10.472544500	10.292261170	10.211839000	10.911858850	10.729182500	10.394235830	0.662840653	10.170566650	3.647360294	3.11x10^-3	3.81x10^-2	-1.819733008
FAM9B	9.372399675	6.914366250	7.347556000	7.405845379	8.681214172	7.528142860	5.152064000	6.188272000	6.228554695	5.734810333	7.065088917	6.901784750	-1.663158273	7.043341586	-3.647086244	3.11x10^-3	3.81x10^-2	-1.820237245
CGNL1	12.184329170	11.477931050	11.970828950	11.950428330	12.519555000	11.547729170	10.393259000	9.774341413	11.578761390	10.608118330	11.199666670	11.174989170	-1.153610951	11.364994800	-3.646659689	3.12x10^-3	3.81x10^-2	-1.821022088
SFRS2B	9.709902457	9.560275502	9.467939500	9.443248667	9.229777833	9.279299234	9.173405083	8.718427500	8.814747733	8.443455530	8.792160667	8.713174583	-0.672512016	9.112151191	-3.646165478	3.12x10^-3	3.81x10^-2	-1.821931424
POLD1	9.474310111	9.684705917	8.487509272	8.824270250	9.559213087	9.813011886	11.105835000	12.018588330	9.740486583	10.519632840	10.749470000	10.067574040	1.393094380	10.003717280	3.646142357	3.12x10^-3	3.81x10^-2	-1.821973965
SLC22A25	6.678490500	5.796119583	7.330193167	5.908310500	6.662116083	5.169866500	0.067004467	4.213490625	3.579168791	5.070922667	3.954180542	4.666217750	-2.665685249	4.924673431	-3.646110280	3.12x10^-3	3.81x10^-2	-1.822032987
COQ4	8.384348091	8.497307563	8.882926250	8.690526554	8.329363083	8.018991566	7.343535141	6.969853500	7.539520250	7.670771462	7.973913250	8.087654583	-0.869702487	8.032392608	-3.644199918	3.13x10^-3	3.82x10^-2	-1.825548083
IDH2	10.138582330	11.334095370	11.773703330	11.112873790	10.989925830	10.840144170	8.954302597	8.571881250	9.712507750	11.034193520	9.897837500	9.225514907	-1.465514550	10.298796860	-3.643269747	3.14x10^-3	3.83x10^-2	-1.827259658
EPHA7	4.158904500	3.880299000	6.084568806	5.913033917	6.442665583	5.817194592	0.800102258	2.194654442	2.065750592	2.253919850	4.813957167	4.589119083	-2.596527168	4.084514149	-3.642486957	3.14x10^-3	3.83x10^-2	-1.828700064
BBOX1	10.975806670	11.727230000	13.775420280	13.297115000	13.327518330	10.323060170	5.145357917	0.141257917	9.328564944	6.441912592	11.533607340	7.540727840	-5.549120316	9.463131584	-3.641036008	3.15x10^-3	3.84x10^-2	-1.831369997
TBC1D7	9.712507750	10.323565610	10.211839000	10.481861120	10.306659920	10.669515410	10.863670000	11.116113330	11.039871820	11.078597680	10.878355830	11.912496670	0.863859420	10.716254510	3.638652849	3.16x10^-3	3.85x10^-2	-1.835755472
ITIH4	17.269173110	17.450782680	16.443365830	17.352013690	17.847829320	17.269173110	13.215638790	14.551130000	15.517980830	15.065920000	16.776284300	16.694060830	-1.968553831	16.287779370	-3.637828629	3.17x10^-3	3.86x10^-2	-1.837272240
UGT2B11	15.331407500	15.665416460	16.864709570	16.434905590	16.306540830	15.839000670	11.776923390	13.590170070	15.626994170	14.747769170	13.429135830	14.960889690	-2.051683052	15.047821910	-3.636738118	3.18x10^-3	3.86x10^-2	-1.839279083
RIMBP2	6.230172167	7.004371500	7.011741252	7.334373667	6.872446250	6.733186167	5.391147417	6.234553917	6.134353500	6.002491176	5.853959083	6.377056109	-0.865454967	6.431654350	-3.635306952	3.18x10^-3	3.87x10^-2	-1.841912885
REEP4	6.679230750	5.611918917	5.773558767	5.539660762	5.972118295	6.412508828	7.773150333	6.975497290	6.524848000	7.476850417	6.524457917	7.026428882	1.052039420	6.524185763	3.635163038	3.19x10^-3	3.87x10^-2	-1.842177737
GLYCTK	11.593041670	11.179726720	12.102111790	12.133800830	12.336943330	11.289842150	8.163280333	9.219001167	11.203581670	9.719822500	10.167366330	11.324140000	-1.806379083	10.869388210	-3.634800259	3.19x10^-3	3.87x10^-2	-1.842845378
CKMT1A	3.740301500	4.134928523	1.027909096	4.332699917	4.689994167	4.164620600	6.299417500	6.888127000	6.626095468	8.459356500	6.177363087	3.852645533	2.702091881	5.032788241	3.632532235	3.20x10^-3	3.88x10^-2	-1.847019439
PSMD1	12.238496670	12.346126140	11.991695830	12.490677700	12.041407460	12.108695830	13.480003970	13.563219170	12.763277190	13.488807600	12.655550000	12.517956860	0.875285859	12.640492870	3.632509033	3.20x10^-3	3.88x10^-2	-1.847062139
FKBPL	4.543662757	2.794716456	3.705596202	1.410600333	4.150763092	4.271951500	5.685716500	5.682479120	5.608195333	5.416717642	4.015059583	7.095733095	2.104435156	4.531765968	3.631479476	3.21x10^-3	3.89x10^-2	-1.848956987
ATG2A	7.536858804	8.317970417	6.980342478	7.455015280	7.455356615	6.578845349	6.283920333	6.099622007	5.758448110	6.832227910	6.612374583	6.314400280	-1.070565953	6.852115181	-3.630415658	3.21x10^-3	3.89x10^-2	-1.850914925
SPP2	14.388036670	15.507993950	15.859337500	14.548032070	14.906948580	15.970527130	8.609122156	12.948448330	13.986053330	12.781265830	13.695760000	12.458791250	-2.783572500	13.805026400	-3.630204094	3.21x10^-3	3.89x10^-2	-1.851304309
PHYHD1	8.927122197	9.609405664	10.257570830	9.408537401	10.003483120	9.200449417	6.087369083	6.306343953	8.123133010	7.164156785	9.358705500	8.700841417	-1.944336481	8.595593198	-3.629790110	3.22x10^-3	3.89x10^-2	-1.852066252
TBX15	10.646533430	10.074112570	12.133000000	11.021094260	12.315425000	11.078597680	5.584446667	8.723406917	10.517016670	7.592752621	10.442242330	7.503721333	-2.817529400	9.802695789	-3.628397773	3.23x10^-3	3.90x10^-2	-1.854628905
NRAS	8.253330214	8.392875511	8.218993083	7.795204852	7.645437917	8.148206667	9.075100969	9.703509523	8.643068167	9.271816917	8.211773667	9.626519667	1.012956778	8.582153096	3.628278917	3.23x10^-3	3.90x10^-2	-1.854847668
CADPS2	8.156226500	7.885277504	7.915992500	7.972000086	7.321670903	7.888024083	9.112423417	9.003496250	8.830963187	8.204753000	8.365198250	8.518578500	0.816036838	8.264550348	3.628007478	3.23x10^-3	3.90x10^-2	-1.855347270
CTBS	10.670830830	11.216725830	11.064194170	11.347755830	11.170706670	10.681527500	10.483777580	9.587455967	10.004774930	9.700491668	9.779269417	10.903501670	-0.948744934	10.550917670	-3.627434721	3.23x10^-3	3.90x10^-2	-1.856401479
MYC	10.912410940	11.956445600	11.953404420	12.041407460	11.524889090	11.704033330	11.051344160	10.933318330	10.733484220	11.146885020	10.035119830	10.454251330	-0.956364656	11.203916140	-3.627250927	3.23x10^-3	3.90x10^-2	-1.856739769
KLK13	4.983982025	4.326987583	4.923219917	5.655724167	5.467229250	4.537158583	2.892985592	4.671096417	3.572600472	3.523605833	3.767308333	4.281807000	-1.197482979	4.383642098	-3.626773845	3.24x10^-3	3.90x10^-2	-1.857617888
TRIP13	1.267907300	0.177961250	4.170101583	0.147304583	4.029431439	3.842627371	6.016840583	6.335018083	4.139683083	5.200251583	4.061658917	5.353105863	2.911870764	3.728490970	3.625219179	3.25x10^-3	3.91x10^-2	-1.860479467
RPL6	15.025112500	14.439508330	14.853866670	14.864347460	14.836946130	14.888944170	15.674963960	16.036450690	15.568652560	15.390884170	15.745724170	15.021210390	0.754860113	15.195550930	3.624602207	3.25x10^-3	3.91x10^-2	-1.861615109
SIGIRR	12.229235000	11.709352970	12.736941670	13.397209860	13.300230000	11.929071670	10.716133600	9.658197449	11.143756710	12.339904170	11.326649170	10.460361500	-1.609506430	11.745586980	-3.624238010	3.25x10^-3	3.91x10^-2	-1.862285483
LOC388630	8.009524417	8.405764500	8.932208917	8.235056150	9.337128256	8.598917027	8.191753506	6.326365833	6.477296500	7.252757009	5.563318834	8.061424333	-1.607613875	7.782626274	-3.623214563	3.26x10^-3	3.92x10^-2	-1.864169351
LOC100128079	8.912503917	8.895544583	9.666966133	9.660042083	11.000800500	10.206110170	6.957776000	7.519956157	8.038712667	8.083215712	8.993342703	9.077619311	-1.611890805	8.917715828	-3.622697060	3.26x10^-3	3.92x10^-2	-1.865121935
VPS54	9.642930994	9.294700833	9.210694500	9.412496417	9.241774083	9.513652167	10.610357080	11.058992850	9.847520833	10.175217500	10.032616080	9.815312740	0.870628015	9.821355507	3.621796543	3.27x10^-3	3.92x10^-2	-1.866779564
RIT1	8.299946750	8.130236083	9.003948500	8.148953667	7.570078000	8.587246966	9.449467496	9.610726000	9.500501739	9.723972419	8.611040500	8.932208917	1.014584518	8.797360586	3.621649428	3.27x10^-3	3.92x10^-2	-1.867050370
TEAD2	4.755556129	4.180143869	4.107600733	4.355241583	4.831469479	4.634750583	5.709636501	5.315251244	4.927559167	5.357094684	5.049898603	5.121879586	0.769426235	4.862173513	3.620810784	3.27x10^-3	3.92x10^-2	-1.868594134
PSMAL	11.401184800	10.202857200	12.123452500	11.859706670	11.786975130	9.050748093	6.777551872	8.641917731	10.321665830	8.045553661	8.291348917	9.960143786	-2.397790431	9.871925515	-3.618973195	3.28x10^-3	3.93x10^-2	-1.871976814
LOC729779	8.002183587	7.729090292	9.441646969	9.135123000	8.528006371	7.152037403	5.505424750	7.551302833	7.001431333	6.414953742	7.056117185	7.002623244	-1.576039089	7.543328393	-3.618041102	3.29x10^-3	3.94x10^-2	-1.873692674
ZNF251	6.420500851	5.763006833	5.794598500	5.408854735	4.597295250	5.871266167	6.742941348	7.698441385	6.564948268	7.361948917	6.217813167	6.557235251	1.214634333	6.249904223	3.617216547	3.29x10^-3	3.94x10^-2	-1.875210593
ID3	11.144200830	10.206506670	11.229079170	10.803506120	11.352489170	11.116113330	9.217546250	8.996670552	10.855956700	9.937839333	10.242560750	9.255974667	-1.224224507	10.363203630	-3.616252599	3.30x10^-3	3.95x10^-2	-1.876985144
RAB10	10.452050840	10.387422540	10.680940000	10.546534670	10.500346440	10.766107060	11.302764560	11.467567610	10.800696660	11.110374800	11.216725830	11.333350170	0.649679685	10.880406760	3.616044541	3.30x10^-3	3.95x10^-2	-1.877368166
LOC391769	15.750891670	15.849693330	15.640277500	15.416103600	15.490585000	15.542123280	16.589152100	15.942806190	16.175598330	16.985042440	16.111219210	16.510768330	0.770818706	16.000355080	3.615134162	3.31x10^-3	3.95x10^-2	-1.879044132
TMEM220	11.655701650	10.787956230	12.940178330	11.519720910	11.423628330	11.184961770	9.315801500	9.406232500	11.345265830	8.376640417	10.373321670	10.210190420	-1.747449149	10.711633300	-3.614807486	3.31x10^-3	3.95x10^-2	-1.879645535
TMBIM6	15.574216200	16.168664170	15.577419760	15.607899700	16.222036140	15.652472960	14.744203980	14.718911960	14.979745000	14.958175470	15.229901790	15.490585000	-0.780197620	15.410352680	-3.612538792	3.32x10^-3	3.97x10^-2	-1.883822226
ARMC6	10.030524480	10.161053800	10.932380350	10.719173510	11.023948210	10.332309060	8.853759214	9.054785498	9.413396284	9.359146918	10.310925900	9.910522973	-1.049475438	10.008493850	-3.612181654	3.33x10^-3	3.97x10^-2	-1.884479734
SPA17	8.756680750	8.443455530	6.953399349	8.160888000	8.024304898	8.961716417	11.331673190	9.377840583	8.723406917	9.182815312	10.161967330	10.785055830	1.710385702	9.071933675	3.611914552	3.33x10^-3	3.97x10^-2	-1.884971485
LOC100133869	6.088328167	5.102035336	5.487302917	5.259156250	5.002387667	5.745859011	7.914700327	6.367055500	6.332803667	8.240400667	6.791507417	5.853615166	1.469168899	6.182096008	3.610835579	3.33x10^-3	3.97x10^-2	-1.886957958
FOLH1	11.366134170	10.219086820	11.952982720	11.673787320	11.676219800	9.010763442	7.190270017	8.629155081	10.383198250	8.140332658	8.492257667	9.826400167	-2.206226738	9.880049009	-3.610108360	3.34x10^-3	3.97x10^-2	-1.888296844
PIPOX	11.424480000	11.408024170	12.381504940	11.883736090	11.982936670	10.892242370	8.002488917	8.958772667	10.995025830	9.457878072	10.193485310	11.240499530	-1.854128984	10.735089550	-3.609359900	3.34x10^-3	3.98x10^-2	-1.889674855
NACA	14.844839170	13.999001500	14.716710830	14.793919170	14.047012500	14.167545310	15.419674170	15.755335000	15.303131180	15.443729170	15.025112500	14.825947500	0.867316838	14.861829830	3.608196051	3.35x10^-3	3.98x10^-2	-1.891817678
UTP6	11.073178330	10.832884690	10.726935000	10.594269500	10.302997080	10.782545000	12.328470000	12.704502160	11.575190000	11.306261110	10.923123850	11.935372500	1.076685003	11.257144100	3.607403698	3.36x10^-3	3.99x10^-2	-1.893276543
CHST7	10.421190510	9.934667583	10.420363500	10.103819330	10.898039490	9.636996917	8.938612083	8.409165667	9.883186707	8.555561250	9.790360723	7.749334667	-1.348142705	9.561774869	-3.606939357	3.36x10^-3	3.99x10^-2	-1.894131488
CYP3A4	16.271357500	16.001107500	17.130553430	16.652505830	16.403683330	15.645653940	11.497150000	10.509402880	14.159980200	11.833882250	12.922450830	17.297777550	-3.314036302	14.693792110	-3.606857119	3.36x10^-3	3.99x10^-2	-1.894282906
N6AMT2	9.326865917	9.215600500	10.065624590	9.907143167	9.371393500	9.074306000	8.873476417	8.806209247	8.351891917	8.751768480	8.146926500	8.892343797	-0.856386220	9.065295836	-3.606115746	3.36x10^-3	3.99x10^-2	-1.895647935
CRTAC1	7.172762333	5.410553506	4.648582000	3.875010250	3.312709721	4.778176766	2.540876083	0.141257917	4.494962115	2.287669250	2.515146042	1.215248250	-2.667105820	3.532746186	-3.606048603	3.36x10^-3	3.99x10^-2	-1.895771562
SUCLG2	10.381952150	10.436395330	11.805967600	11.282491670	10.926370830	10.305248500	9.195825667	8.817542338	10.150590750	9.856350333	9.419818917	10.339936550	-1.226393589	10.243207550	-3.605692305	3.37x10^-3	3.99x10^-2	-1.896427591
FBL	13.800297710	13.395118330	13.315163280	13.455956450	13.370608330	13.568243330	15.981139170	15.303131180	14.464321670	14.619884170	14.087482500	13.768728190	1.219883237	14.094172860	3.605563689	3.37x10^-3	3.99x10^-2	-1.896664404
CAPRIN1	8.529944667	8.522276559	9.401375667	9.016037420	8.707838138	8.983984083	10.620686170	9.785409333	9.614933083	9.848750250	9.279702250	9.548002628	0.922671197	9.321578354	3.604911103	3.37x10^-3	3.99x10^-2	-1.897865980
HAT1	11.154385000	11.115399530	12.135680830	11.767215000	11.316830250	11.534457500	12.756607900	12.925451670	12.473522500	12.173990580	11.753662000	12.519555000	0.929803588	11.968896480	3.603214265	3.38x10^-3	4.00x10^-2	-1.900990345
CCNE2	4.955156333	5.255586583	5.384531780	5.238226881	0.000000000	2.262238133	6.673736667	7.425346000	7.549305333	7.029610917	6.165271440	6.577848718	3.054229894	5.376404899	3.602846915	3.38x10^-3	4.00x10^-2	-1.901666753
LOC100128266	6.637748320	6.594504792	7.831754667	6.970906417	6.252166000	7.024445610	8.287011177	9.234723000	8.202784833	9.089902583	6.794215000	8.391560250	1.448111840	7.609310221	3.601399218	3.39x10^-3	4.01x10^-2	-1.904332458
TOPBP1	7.200855417	7.695993333	6.186111167	6.863588657	7.144880333	7.161054402	8.268401948	9.208439623	7.704539750	8.266365858	7.600976905	8.018632583	1.135812226	7.609986665	3.600838214	3.40x10^-3	4.01x10^-2	-1.905365473
ACAT1	15.096034940	15.533313220	16.336328060	15.779599160	15.721276530	15.229901790	12.658172050	12.919145910	14.697622940	14.274462850	14.520162170	15.229901790	-1.566164332	14.832993450	-3.600710661	3.40x10^-3	4.01x10^-2	-1.905600346
AGXT2L1	11.274579810	12.731059440	13.706686080	13.360563220	13.740389270	13.496306770	6.177363087	8.746255830	11.620402720	9.040680767	10.641569060	12.449072720	-3.272373402	11.415410730	-3.598964244	3.41x10^-3	4.02x10^-2	-1.908816205
ZSCAN22	9.378278081	9.503059373	11.473323330	11.533607340	10.178325080	8.534250841	6.781680417	8.084482417	9.290857995	8.953050417	6.921909417	7.671139524	-2.149620645	9.025330353	-3.598672429	3.41x10^-3	4.02x10^-2	-1.909353562
KLHL12	8.993644516	8.737640750	8.821386167	9.342660167	8.744928968	9.052747583	10.417648080	9.669185093	9.521571024	9.361381417	9.558022592	9.943534750	0.796389135	9.347029259	3.597438377	3.42x10^-3	4.02x10^-2	-1.911626012
SNX16	6.755124250	6.203807866	6.613653833	6.615803164	6.587932917	6.274391583	6.821863750	7.261057993	7.291410556	7.145422123	7.981778557	7.271297333	0.787019450	6.901961994	3.597264385	3.42x10^-3	4.02x10^-2	-1.911946413
EIF4G2	13.689375830	13.442037500	12.932889820	13.361932510	12.927648330	13.543991670	14.616786810	14.101645830	14.065010000	13.988985000	13.813283330	13.948342870	0.772696364	13.702660790	3.597103124	3.42x10^-3	4.02x10^-2	-1.912243371
KIF22	7.293102703	7.450546583	7.007035314	7.022312886	7.106825489	7.533785223	8.679845249	8.768731491	7.535740572	9.949895917	7.800503075	8.341136063	1.277040695	7.874121714	3.596963298	3.42x10^-3	4.02x10^-2	-1.912500858
LOC729768	11.179437500	10.802642500	10.974543400	10.545620000	10.263591170	10.299780000	11.793107500	12.338242500	11.806745830	11.547729170	11.489165270	10.865983430	0.962559856	11.158882360	3.593851999	3.44x10^-3	4.04x10^-2	-1.918230390
CCL18	9.374245072	7.913997917	7.839100333	5.017045008	4.969242333	9.273337324	12.783534170	11.112873790	13.467075000	12.510857840	7.203296297	11.015974570	3.951107279	9.373381637	3.593779174	3.44x10^-3	4.04x10^-2	-1.918364503
FAM70A	3.221313593	0.177961250	1.027909096	0.147304583	0.000000000	2.405778089	4.973432167	4.545530458	4.782304127	4.350295500	1.095812083	3.253226799	2.670055754	2.498405645	3.593197371	3.45x10^-3	4.04x10^-2	-1.919435935
AQP3	11.798850140	10.902232820	10.274434260	10.923123850	10.647301920	10.614166140	10.146946690	8.531371784	9.962920327	10.154932300	9.790829267	8.469822777	-1.350547662	10.184744360	-3.591652007	3.46x10^-3	4.05x10^-2	-1.922281884
ACTA2	11.953404420	11.214052750	11.392723310	10.871646990	10.017059800	12.350630290	11.873603700	12.424109160	13.879809500	13.424033700	13.086443840	12.399553160	1.548005916	12.073922550	3.589896981	3.47x10^-3	4.06x10^-2	-1.925514021
GLDC	12.301837920	13.054166210	12.763277190	13.119002560	12.954553330	12.508350000	8.987394922	12.190271090	11.555030840	11.194187500	11.994197500	9.532510729	-1.874599103	11.846231650	-3.589795401	3.47x10^-3	4.06x10^-2	-1.925701097
CENPJ	7.162448160	6.300060831	5.858452417	6.007626800	6.657946265	6.694851750	8.315101861	8.639453917	7.446656162	6.912233417	7.021053577	7.731671828	1.230797423	7.062296415	3.589500087	3.47x10^-3	4.06x10^-2	-1.926244970
PIGM	9.237884583	9.255444448	9.017282417	9.109646920	9.104365917	9.287736931	9.989439577	10.235859080	9.932081806	9.614479791	9.349522250	10.384346290	0.748894596	9.543174167	3.586655065	3.49x10^-3	4.08x10^-2	-1.931484695
XCR1	9.579760583	10.059287630	11.181923330	11.390447540	11.836434700	10.945576540	7.373254495	8.456566750	9.394093250	9.241478667	10.170695750	9.624990333	-1.788725179	9.937875797	-3.586413321	3.49x10^-3	4.08x10^-2	-1.931929928
RPL23A	16.001107500	15.257157500	15.885992500	15.712556670	15.303131180	15.740825080	16.864709570	17.078890000	16.937309100	16.488785630	15.899503330	16.119017200	0.914574068	16.107415440	3.584830810	3.50x10^-3	4.09x10^-2	-1.934844564
YWHAQ	13.016705830	12.951638330	13.321291670	12.982820830	12.945416670	13.081599770	14.342068330	14.711054170	13.954754170	14.130512610	12.975477500	13.890457500	0.950808528	13.525316450	3.584768660	3.50x10^-3	4.09x10^-2	-1.934959030
STXBP6	8.508464000	7.277675083	7.610663563	8.450675017	8.343656917	7.899932083	10.009387300	10.344105290	9.650613500	7.955867750	8.995318113	9.488493667	1.392119825	8.711237690	3.582212313	3.52x10^-3	4.10x10^-2	-1.939667394
CCT8	12.471921670	12.028298330	12.502164170	12.379114920	12.035870830	11.959908890	12.636463330	13.288160830	13.292885770	13.252415830	12.674578330	12.766509170	0.755622411	12.607357670	3.582210238	3.52x10^-3	4.10x10^-2	-1.939671216
DHTKD1	11.993335000	11.879411670	12.247030340	12.418745000	12.704502160	11.773703330	9.418554590	9.151607536	11.066908330	9.903601829	10.861233330	12.334497270	-1.713387434	11.312760870	-3.581864774	3.52x10^-3	4.10x10^-2	-1.940307515
ACVR1B	9.433493566	9.689909167	11.218318800	11.361386040	11.540726850	9.538673113	7.237192115	8.210928677	9.534077569	9.411232112	9.182815312	8.149703159	-1.842759765	9.542371373	-3.581214813	3.52x10^-3	4.11x10^-2	-1.941504667
hCG_1745121	4.503731000	4.337841333	6.068097333	4.204496750	4.463789417	5.149734833	4.098479361	3.847818499	3.865016000	2.335872750	2.327453500	3.343172850	-1.484979618	4.045458636	-3.581061081	3.53x10^-3	4.11x10^-2	-1.941787824
TEKT1	1.616939283	0.177961250	4.191908000	4.209540281	1.039792508	3.184315778	0.067004467	0.141257917	0.249255292	0.102078833	0.005980223	0.132998375	-2.286980333	1.259919351	-3.579486771	3.54x10^-3	4.12x10^-2	-1.944687566
C12orf5	7.716846823	7.816406326	8.077262833	7.969409167	6.491391000	7.959554917	9.372708948	8.904905760	8.946436809	8.907964367	7.977572917	8.628284615	1.117833725	8.230728707	3.578842719	3.54x10^-3	4.12x10^-2	-1.945873870
AFF1	9.150414518	8.817972010	8.671477797	8.982154115	9.237313953	8.924094836	8.702188661	8.254004616	8.380154948	7.412429727	8.161853398	7.850494074	-0.837050301	8.545379388	-3.576254822	3.56x10^-3	4.14x10^-2	-1.950640720
AP2A1	7.562163655	7.847343732	8.773580547	8.898202183	7.762862188	7.848663081	5.767879805	6.377517143	7.168150157	7.077299267	7.326509236	7.465441162	-1.251669769	7.489634346	-3.575437616	3.56x10^-3	4.14x10^-2	-1.952146031
BMPR1A	7.406724917	6.511908583	6.912604850	6.617568300	6.180990068	7.356497917	8.379022984	8.385361190	7.849209000	8.443808417	6.798633261	8.119714491	1.164909118	7.413503665	3.575267909	3.56x10^-3	4.14x10^-2	-1.952458635
NCAPH2	8.799725000	8.742309833	8.589777416	8.721368750	8.859062000	8.681562250	9.320146583	9.166892787	9.190390417	9.741515110	10.177399830	9.321102917	0.753940400	9.109271075	3.573155434	3.58x10^-3	4.15x10^-2	-1.956349939
NR3C2	8.837528018	7.599438333	9.012580333	8.786052250	9.499725333	8.836944583	7.440560250	2.923131459	7.536088833	5.680681250	6.332485750	7.499936750	-2.526564093	7.498762762	-3.572274406	3.58x10^-3	4.16x10^-2	-1.957972874
NAP1L1	11.622071670	10.699518010	10.628062500	10.493713000	10.483094880	11.573878430	13.223817610	12.513704210	12.191065000	11.900090000	11.879411670	11.230805000	1.239759168	11.536602660	3.571274595	3.59x10^-3	4.16x10^-2	-1.959814643
SMAD2	10.096724330	9.844267250	10.167366330	9.947781537	9.672002667	10.225087520	10.960567970	10.708986670	10.631791670	11.469753330	10.146367680	11.551877110	0.919352463	10.451881170	3.570841368	3.59x10^-3	4.16x10^-2	-1.960612703
TAF8	5.249242000	5.795806667	5.527317944	5.180015083	4.808006815	6.156677500	6.539556857	6.795720833	5.626264527	6.513142917	6.531754167	7.465833218	1.125867751	6.015778211	3.570671646	3.60x10^-3	4.16x10^-2	-1.960925355
MANBAL	8.168022750	8.059937000	8.470157417	8.411086667	8.435954579	8.294470408	8.974742518	8.982991745	8.798454917	9.021660917	8.892705250	8.736849833	0.594629393	8.603919500	3.569842397	3.60x10^-3	4.17x10^-2	-1.962452957
THY1	11.367901670	11.319667500	10.862111670	11.161939170	11.020173330	11.411320830	12.043354670	11.736053710	12.911569170	12.720867580	13.037206670	11.291536170	1.099578965	11.740308510	3.569228240	3.61x10^-3	4.17x10^-2	-1.963584337
LOC649839	14.685900000	13.870056800	13.874624660	13.761923860	14.042479200	14.415166620	15.533313220	15.376494170	14.950132500	14.514578330	15.553156330	14.479461670	0.959497513	14.588107280	3.568784491	3.61x10^-3	4.17x10^-2	-1.964401803
C1S	17.616495800	17.385194280	16.644134170	17.012093980	17.237363330	17.094937500	16.626527500	14.784152500	16.418977810	16.242232500	16.066396960	16.271357500	-1.096762383	16.616655320	-3.568697984	3.61x10^-3	4.17x10^-2	-1.964561164
DDX10	9.773984333	9.845108500	9.561545972	9.853030708	9.257717053	9.520402597	10.251127000	10.278316920	10.264886170	10.214189830	10.568719330	10.111372000	0.646137015	9.958366701	3.568046116	3.61x10^-3	4.17x10^-2	-1.965762031
DUXAP10	3.473336317	4.004256250	3.464671370	3.286790833	1.266730596	1.593040157	6.390392500	7.980312599	5.695802443	4.818021946	2.791165097	8.806601583	3.232245107	4.464260141	3.568040542	3.61x10^-3	4.17x10^-2	-1.965772300
RFWD2	11.392723310	11.440039170	10.874070000	11.196456300	11.201067140	11.536315000	12.191065000	12.046181250	11.979184170	11.962217910	11.501135000	12.126401670	0.694252346	11.620571330	3.566918389	3.62x10^-3	4.17x10^-2	-1.967839546
C18orf1	9.171732720	8.942967083	10.268871920	10.338253170	9.767987083	8.955049750	8.139322500	8.044465667	9.039458855	8.508154417	8.596659667	6.911821645	-1.367496495	8.890395372	-3.566913151	3.62x10^-3	4.17x10^-2	-1.967849196
C10orf33	7.857585250	8.958441635	10.178325080	9.691616000	9.078363500	8.868323667	6.701783833	7.378972833	7.365279833	8.568009217	8.021723416	7.975919083	-1.436827820	8.387028613	-3.566447519	3.62x10^-3	4.17x10^-2	-1.968706998
CCT6B	7.746992184	7.755616483	8.929906348	7.811969083	8.130989399	7.367968967	5.943662167	6.873515083	7.875044250	6.148842917	5.516667163	6.933789904	-1.408653497	7.252913662	-3.565869837	3.63x10^-3	4.18x10^-2	-1.969771230
SMYD2	11.943209900	11.875888330	11.788861670	12.022277500	11.554244790	11.967302500	13.418153330	13.160990830	12.066363330	13.497940830	12.060279660	13.864009170	1.152658744	12.434960150	3.564847035	3.64x10^-3	4.18x10^-2	-1.971655498
FAM82A1	10.585285580	10.988131670	11.959908890	11.727230000	11.091157500	10.852370830	9.275281417	10.267612150	9.994777717	9.816668333	9.576840083	11.088970000	-1.197322462	10.602019510	-3.563912276	3.64x10^-3	4.19x10^-2	-1.973377590
SULF1	8.733595843	7.196363833	6.975497290	7.626810667	7.705285917	7.810174286	11.731834170	12.122508330	11.756047500	12.462778330	9.729240833	6.599869167	3.059091749	9.204167181	3.563697606	3.64x10^-3	4.19x10^-2	-1.973773077
MTA3	8.935228917	8.450675017	8.001272788	8.135232250	7.988229689	8.081684316	9.271816917	9.611740612	8.471211971	9.421899072	9.247806425	8.910590083	0.890457017	8.710615671	3.560842291	3.66x10^-3	4.20x10^-2	-1.979033510
LOC646119	15.490585000	14.648635800	15.449490000	15.114873090	14.899029870	15.285263930	16.222036140	16.148221670	16.142203550	16.066396960	15.356938170	15.785611740	0.805588422	15.550773830	3.560778433	3.66x10^-3	4.20x10^-2	-1.979151159
KIAA1881	6.824678833	7.833809250	6.971976841	7.592752621	7.650126333	5.859181914	4.508007167	5.701710182	5.327584167	5.872844000	6.898376000	5.479782750	-1.490703588	6.376735838	-3.560432046	3.67x10^-3	4.20x10^-2	-1.979789331
GOLGA8E	8.979908583	8.017309176	8.179328667	9.662499750	8.847370000	8.006747366	6.916749311	7.375165665	7.279553385	6.548462917	6.700841120	8.565809946	-1.384430200	7.923312157	-3.559937078	3.67x10^-3	4.21x10^-2	-1.980701248
TRIM11	9.984013667	10.044079750	9.046540000	9.463255792	9.333754548	9.605643059	11.066908330	11.005121330	10.302997080	10.995982170	9.797802738	10.282905920	0.995738460	10.077417030	3.557319759	3.69x10^-3	4.22x10^-2	-1.985523419
LOC157860	6.193324146	6.453004297	7.865673917	7.984347917	7.207989584	7.651828413	4.306434866	5.157541915	6.288183667	5.722242344	5.242883417	6.898714315	-1.623361292	6.414347400	-3.556992855	3.69x10^-3	4.22x10^-2	-1.986125721
MTNR1B	4.141840583	4.463789417	4.744509083	4.813957167	4.919673535	1.577471708	2.308153750	1.816351075	3.043121430	2.772275976	0.005980223	0.132998375	-2.430393444	2.895010194	-3.556092098	3.70x10^-3	4.23x10^-2	-1.987785324
NARS	12.214605830	12.418745000	11.671995000	12.038639170	11.880248330	12.332612500	13.407098120	12.528612500	12.493688020	13.094122500	12.905315830	12.852132500	0.787353939	12.486484610	3.555092206	3.70x10^-3	4.23x10^-2	-1.989627598
ICA1L	2.796278250	2.479375295	1.027909096	1.873488458	0.243923333	2.029875517	4.220561833	3.469938340	3.682756583	2.791165097	2.608717000	3.001797105	1.554014335	2.518815492	3.553898111	3.71x10^-3	4.24x10^-2	-1.991827714
FLJ11235	10.625776830	10.403763860	10.575716330	10.469942270	10.992869170	9.794646917	8.842724314	9.063362083	9.943840917	8.718427500	9.849281378	10.036210480	-1.068144784	9.943046838	-3.552756157	3.72x10^-3	4.25x10^-2	-1.993931786
PFKFB1	8.818735515	8.585333583	9.678289457	8.963452500	8.573642766	8.021994917	4.454403294	4.894567599	6.828734833	5.990161167	7.946820000	8.619074333	-2.317947918	7.614600830	-3.552086689	3.72x10^-3	4.25x10^-2	-1.995165306
PABPC1	14.358253330	13.990608330	13.700778690	13.395118330	13.978459170	13.816293330	15.314630480	15.072200100	14.757395900	15.350637500	15.183721670	13.755465000	1.032423244	14.389463490	3.551876646	3.72x10^-3	4.25x10^-2	-1.995552320
QPCT	7.170507167	6.808948447	8.194564415	6.939419000	7.426240317	7.376168333	7.992646563	9.286041083	8.580281417	8.599770500	7.693314488	10.007841580	1.374007993	8.006311943	3.549534040	3.74x10^-3	4.27x10^-2	-1.999868743
PEBP1	17.847829320	17.682496670	17.321425240	17.818158490	17.616495800	17.682496670	16.211703330	16.616331400	16.972379490	16.904734040	16.972379490	17.483762880	-0.801268590	17.260849400	-3.549223736	3.74x10^-3	4.27x10^-2	-2.000440511
TMSB4Y	8.698440250	7.010900250	11.638900830	11.692025010	11.861364370	10.806948330	4.959583620	6.107285181	8.644274365	8.472600750	6.297062917	7.748982167	-3.246465008	8.661530670	-3.548841460	3.75x10^-3	4.27x10^-2	-2.001144894
DACH1	6.970906417	5.041045558	6.921909417	6.497781314	5.762496750	7.193499377	5.365842917	1.635339148	5.189401253	4.804435024	3.163047583	0.132998375	-3.016095755	4.889891928	-3.548733997	3.75x10^-3	4.27x10^-2	-2.001342908
[truncated: 3,381 more rows]
